# Supplementary material for: Substrate-controlled product divergence in the reaction of α-fluoro-β-ketoamides with arynes
Source: Royal Society of Chemistry journal article supplement (doi:10.1039/d2cc04657a), 2022-01-01

## ***Electronic Supplementary Information***

# **Substrate-controlled product divergence in the reaction of $\alpha$ -fluoro- $\beta$ -ketoamides with arynes**

Sanoop P Chandrasekharan,<sup>†</sup> Narendra Kumar Vaishanv,<sup>†</sup> Ruchir Kant,<sup>§</sup> Kishor Mohanan<sup>†,‡,\*</sup>

<sup>†</sup>Medicinal & Process Chemistry Division and <sup>§</sup>Molecular and Structural Biology Division, CSIR-Central Drug Research Institute, BS-10/1, Sector 10, Jankipuram Extension, Sitapur Road, P.O. Box 173, Lucknow 226031, India

<sup>‡</sup>Academy of Scientific and Innovative Research, Ghaziabad-201002, India

E-mail: [kishor.mohanan@cdri.res.in](mailto:kishor.mohanan@cdri.res.in)

### **Contents**

|    |                                                                                                                                     |     |
|----|-------------------------------------------------------------------------------------------------------------------------------------|-----|
| 1. | General experimental information                                                                                                    | S1  |
| 2. | General procedure for the synthesis and characterization data for $\alpha$ -fluoro- $\alpha$ -arylacetomides <b>3a-3ab</b>          | S2  |
| 3. | General procedure for the synthesis and the characterization data for $\alpha$ -fluoro- $\alpha$ -acetylarylacetomides <b>6a-6m</b> | S14 |
| 4. | Procedure and characterization data for compound <b>7</b>                                                                           | S21 |
| 5. | X-ray data of compound <b>6f</b>                                                                                                    | S22 |
| 6. | Copies of <sup>1</sup> H, <sup>13</sup> C, and <sup>19</sup> F NMR spectra for all compounds                                        | S24 |

## General experimental information

All reactions were performed under an air atmosphere in oven-dried round-bottom flasks. The reactions were monitored by TLC visualized by UV (254 nm) and/or with iodine. Column chromatography was performed on 100-200 mesh silica gel using ethyl acetate-hexane gradient system. NMR data were recorded at Bruker AV 400 MHz in CDCl<sub>3</sub> using as internal standards the residual CHCl<sub>3</sub> signal for <sup>1</sup>H NMR ( $\delta$  = 7.26 ppm) and the deuterated solvent signal for <sup>13</sup>C NMR ( $\delta$  = 77.16 ppm). Coupling constants are given in Hertz (Hz), and the classical abbreviations are used to describe the signal multiplicities. Melting points were measured with a Büchi B-540 apparatus and were uncorrected. High-resolution mass spectra were obtained using Q-TOF mass spectrometer. All commercially available reagents were used as received. The primary and secondary  $\alpha$ -fluoro- $\beta$ -ketoamides (**1a-1v** & **5a-5h**) were synthesized from the corresponding primary and secondary amines<sup>1</sup> following the literature procedure.<sup>2</sup> 2-(Trimethylsilyl)phenyltrifluoromethanesulfonate (**2a**) and other aryne precursors were synthesized following the literature procedure (**2b-2i**).<sup>3</sup>

- 
1. S. W. Youn and Kim, Y. H. Pd(II)/Ag(I)-promoted one-pot synthesis of cyclic ureas from (hetero)aromatic amines and isocyanates. *Org. Lett.*, 2016, **18**, 6140–6143.
  2. (a) B. Miriyala and J. S. Williamson, An efficient and rapid synthesis of  $\beta$ -carboxamide derivatives using 2,2-dimethyl-2H,4H-1,3-dioxin-4-ones by microwave irradiation. *Tetrahedron Lett.*, 2003, **44**, 7957–7959. (b) J. Bi, Z. Zhang, Q. Liu and G. Zhang, Catalyst-Free and Highly Selective Electrophilic Mono-Fluorination of Acetoacetamides: Facile and Efficient Preparation of 2-Fluoroacetoacetamides in PEG-400. *Green Chem.*, 2012, **14**, 1159-1162.
  3. (a) X. Yang and G. C. Tsui, Copper-mediated trifluoromethylation–allylation of arynes. *Org. Lett.* 2018, **20**, 1179–1182. (b) K. Nogi, T. Fujihara, J. Terao and Y. Tsuji, Y. Cobalt- and Nickel-catalyzed carboxylation of alkenyl and sterically hindered aryl triflates utilizing CO<sub>2</sub>. *J. Org. Chem.* **2015**, **80**, 11618–11623.

### General procedure for the synthesis of $\alpha$ -Fluoro- $\alpha$ -arylacetomides **3**

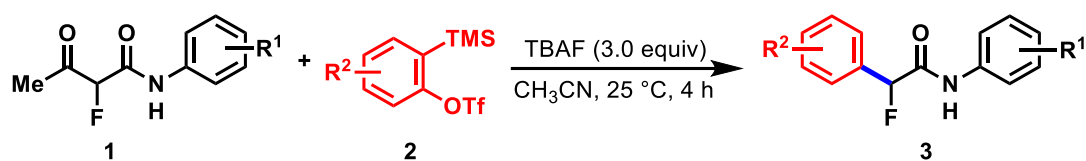

An oven-dried round bottom flask charged with 2-fluoro-3-oxo-*N*-phenylbutanamide **1** (0.20 mmol) was sealed, evacuated, and backfilled with nitrogen. Subsequently, freshly distilled CH<sub>3</sub>CN (2.0 mL), 2-(trimethylsilyl)phenyl trifluoromethanesulfonate **2** (0.30 mmol), and TBAF (0.60 mmol) were added, and the reaction mixture was stirred at 25 °C for 4 h. After the completion of the reaction, as indicated by TLC, the solvent was evaporated, and the crude reaction mixture was extracted using ethyl acetate (15 × 3 mL) and water (15 mL). The organic layer was washed with brine, dried over anhydrous Na<sub>2</sub>SO<sub>4</sub>, and evaporated under reduced pressure. The residue was purified using column chromatography (100-200 mesh silica gel) using ethyl acetate/hexane as the eluent to afford product **3**.

### Gram scale synthesis of $\alpha$ -Fluoro- $\alpha$ -arylacetamide **3g**

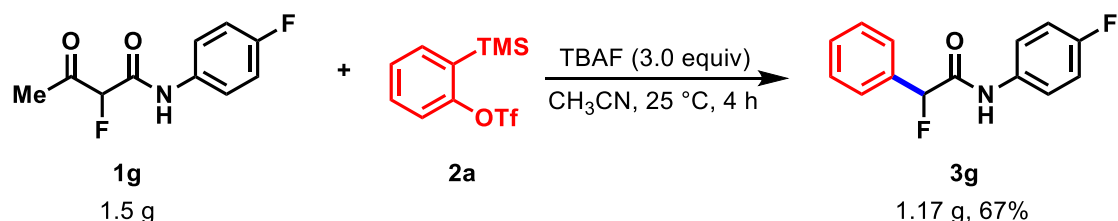

An oven-dried round bottom flask charged with 2-fluoro-3-oxo-*N*-phenylbutanamide **1g** (1.5 g, 7.05 mmol) was sealed, evacuated, and backfilled with nitrogen. Subsequently, freshly distilled CH<sub>3</sub>CN (10.0 mL), 2-(trimethylsilyl)phenyl trifluoromethanesulfonate **2a** (3.2 g, 10.6 mmol), and TBAF (21.1 mmol) were added, and the reaction mixture was stirred at 25 °C for 4 h. After the completion of the reaction, as indicated by TLC, the solvent was evaporated, and the crude reaction mixture was extracted using ethyl acetate (150 × 3 mL) and water (150 mL). The organic layer was washed with brine, dried over anhydrous Na<sub>2</sub>SO<sub>4</sub>, and evaporated under reduced pressure. The residue was purified using column chromatography (100-200 mesh silica gel) using ethyl acetate/hexane as the eluent to afford the product **3g** as white solid (1.17 g, 67%).

### Compound **3a**: 2-Fluoro-*N*,2-diphenylacetamide

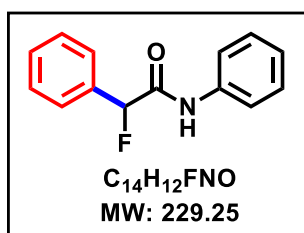

Following the general procedure, the treatment of 2-fluoro-3-oxo-*N*-phenylbutanamide **1a** (39 mg, 0.20 mmol) with 2-(trimethylsilyl)phenyl trifluoromethanesulfonate **2a** (90 mg, 0.30 mmol) in the presence of TBAF (0.60 mL, 0.60 mmol) in CH<sub>3</sub>CN (2 mL) at 25 °C for 4 h followed by column chromatography afforded the product **3a** as white solid (33 mg, 72%).  $R_f$ (Ethyl acetate/Hexane: 10/90) = 0.35.

**Mp** 104-106 °C. <sup>13</sup>C NMR (100 MHz, δ ppm/CDCl<sub>3</sub>): 166.5 (d, *J*<sub>C-F</sub> = 20.5 Hz, C), 136.7 (C), 134.5 (d, *J*<sub>C-F</sub> = 19.0 Hz, C), 129.7 (d, *J*<sub>C-F</sub> = 2.4 Hz, CH), 129.2 (CH), 129.2 (CH), 128.9 (CH), 128.9 (CH), 126.8 (d, *J*<sub>C-F</sub> = 6.5 Hz, CH), 126.8 (d, *J*<sub>C-F</sub> = 6.5 Hz, CH), 125.2 (CH), 120.2 (CH), 120.2 (CH), 92.0 (d, *J*<sub>C-F</sub> = 188.3 Hz, CH). <sup>1</sup>H NMR (400 MHz, δ ppm/CDCl<sub>3</sub>): 8.16 (s, 1H), 7.62-7.60 (m, 1H), 7.59-7.58 (m, 1H), 7.55-7.50 (m, 2H), 7.46-7.40 (m, 3H), 7.38-7.33 (m, 2H), 7.19-7.14 (m, 1H), 5.90 (d, *J* = 48.4 Hz, 1H). <sup>19</sup>F NMR (376 MHz, δ ppm/CDCl<sub>3</sub>): -175.2 (s). HRMS (ESI) *m/z*: [M+H]<sup>+</sup> Calcd for C<sub>14</sub>H<sub>13</sub>FNO 230.0976; found 230.0980.

### Compound 3b: 2-Fluoro-*N*-(4-methoxyphenyl)-2-phenylacetamide

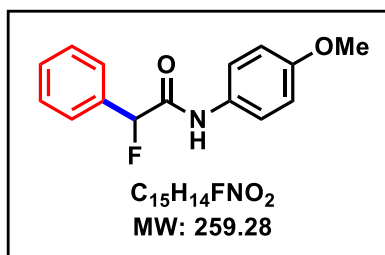

Following the general procedure, treatment of 2-fluoro-*N*-(4-methoxyphenyl)-3-oxobutanamide **1b** (45 mg, 0.20 mmol) with 2-(trimethylsilyl)phenyl trifluoromethanesulfonate **2a** (90 mg, 0.30 mmol) in the presence of TBAF (0.60 mL, 0.60 mmol) in CH<sub>3</sub>CN (2 mL) at 25 °C for 4 h followed by column chromatography afforded the product **3b** as white solid (36 mg, 70%). *R<sub>f</sub>* (Ethyl acetate/Hexane: 20/80) = 0.37. **Mp** 104-106 °C. <sup>13</sup>C NMR (100 MHz, δ ppm/CDCl<sub>3</sub>): 167.2 (d, *J*<sub>C-F</sub> = 16.7 Hz, C), 157.9 (C), 135.3 (d, *J*<sub>C-F</sub> = 15.3 Hz, C), 130.4 (C), 130.2 (d, *J*<sub>C-F</sub> = 2.2 Hz, CH), 129.4 (CH), 129.4 (CH), 127.3 (d, *J*<sub>C-F</sub> = 5.5 Hz, CH), 127.3 (d, *J*<sub>C-F</sub> = 5.5 Hz, CH), 122.4 (CH), 122.4 (CH), 114.8 (CH), 114.8 (CH), 92.0 (d, *J*<sub>C-F</sub> = 151.9 Hz, CH), 55.4 (CH<sub>3</sub>). <sup>1</sup>H NMR (400 MHz, δ ppm/CDCl<sub>3</sub>): 8.10 (s, 1H), 7.53-7.47 (m, 4H), 7.50-7.40 (m, 3H), 6.90-6.86 (m, 2H), 5.88 (d, *J* = 48.4 Hz, 1H), 3.80 (s, 3H). <sup>19</sup>F NMR (376 MHz, δ ppm/CDCl<sub>3</sub>): -175.3 (s). HRMS (ESI) *m/z*: [M+H]<sup>+</sup> Calcd for C<sub>15</sub>H<sub>15</sub>FNO<sub>2</sub> 260.1081; found 260.1078.

### Compound 3c: 2-Fluoro-2-phenyl-*N*-(*p*-tolyl)acetamide

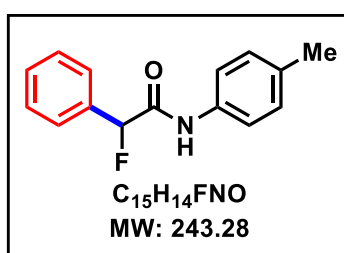

Following the general procedure, treatment of 2-fluoro-3-oxo-*N*-(*p*-tolyl)butanamide **1c** (42 mg, 0.20 mmol) with 2-(trimethylsilyl)phenyl trifluoromethanesulfonate **2a** (90 mg, 0.30 mmol) in the presence of TBAF (0.60 mL, 0.60 mmol) in CH<sub>3</sub>CN (2 mL) at 25 °C for 4 h followed by column chromatography afforded the product **3c** as brown solid (33 mg, 68%). *R<sub>f</sub>* (Ethyl acetate/Hexane: 10/90) = 0.37. **Mp** 126-128 °C. <sup>13</sup>C NMR (100 MHz, δ ppm/CDCl<sub>3</sub>): 166.4 (d, *J*<sub>C-F</sub> = 20.6 Hz, C), 134.9 (C), 134.7 (d, *J*<sub>C-F</sub> = 19.1 Hz, C), 134.2 (C), 129.7 (CH), 129.7 (CH), 129.7 (d, *J*<sub>C-F</sub> = 2.7 Hz, CH), 128.9 (CH), 128.9 (CH), 126.8 (d, *J*<sub>C-F</sub> = 6.5 Hz, CH), 126.8 (d, *J*<sub>C-F</sub> = 6.5 Hz, CH), 120.2 (CH), 120.2 (CH), 92.0 (d, *J*<sub>C-F</sub> = 188.2 Hz, CH), 21.0 (CH<sub>3</sub>). <sup>1</sup>H NMR (400 MHz, δ ppm/CDCl<sub>3</sub>): 8.16 (s, 1H), 7.54-7.51 (m, 2H), 7.50-7.45 (m, 2H), 7.45-7.40 (m, 3H), 7.15 (d, *J* = 8.4 Hz, 2H), 5.86 (d, *J* = 48.4 Hz, 1H), 2.33 (s, 3H). <sup>19</sup>F NMR (376 MHz, δ ppm/CDCl<sub>3</sub>): -175.2 (s). HRMS (ESI) *m/z*: [M+H]<sup>+</sup> Calcd for C<sub>15</sub>H<sub>15</sub>FNO 244.1132; found 244.1128.



### Compound 3d: 2-Fluoro-*N*-(4-iodophenyl)-2-phenylacetamide

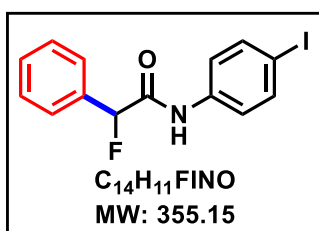

Following the general procedure, treatment of 2-fluoro-*N*-(4-iodophenyl)-3-oxobutanamide **1d** (64 mg, 0.20 mmol) with 2-(trimethylsilyl)phenyl trifluoromethanesulfonate **2a** (90 mg, 0.30 mmol) in the presence of TBAF (0.60 mL, 0.60 mmol) in CH<sub>3</sub>CN (2 mL) at 25 °C for 4 h followed by column chromatography afforded the product **3d** as white solid (49 mg, 69%). *R<sub>f</sub>* (Ethyl acetate/Hexane:

10/90) = 0.37. **Mp** 144-146 °C. <sup>13</sup>C NMR (100 MHz, δ ppm/CDCl<sub>3</sub>): 166.6 (d, *J*<sub>C-F</sub> = 16.7 Hz, C), 138.2 (CH), 138.2 (CH), 136.6 (C), 134.3 (d, *J*<sub>C-F</sub> = 15.4 Hz, C), 129.8 (d, *J*<sub>C-F</sub> = 1.0 Hz, CH), 129.0 (CH), 129.0 (CH), 126.7 (d, *J*<sub>C-F</sub> = 5.2 Hz, CH), 126.7 (d, *J*<sub>C-F</sub> = 5.2 Hz, CH), 122.0 (CH), 122.0 (CH), 92.0 (d, *J*<sub>C-F</sub> = 150.6 Hz, CH), 88.6 (C). <sup>1</sup>H NMR (400 MHz, δ ppm/CDCl<sub>3</sub>): 8.17 (s, 1H), 7.66-7.63 (m, 2H), 7.52-7.47 (m, 2H), 7.44-7.40 (m, 3H), 7.40-7.36 (m, 2H), 5.88 (d, *J* = 48.4 Hz, 1H). <sup>19</sup>F NMR (376 MHz, δ ppm/CDCl<sub>3</sub>): -175.8 (s). **HRMS** (ESI) *m/z*: [M+H]<sup>+</sup> Calcd for C<sub>14</sub>H<sub>12</sub>FINO 355.9942; found 355.9943.

### Compound 3e: *N*-(4-chlorophenyl)-2-fluoro-2-phenylacetamide

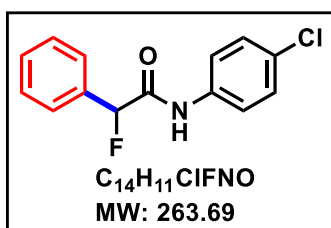

Following the general procedure, treatment of *N*-(4-chlorophenyl)-2-fluoro-3-oxobutanamide **1e** (46 mg, 0.20 mmol) with 2-(trimethylsilyl)phenyl trifluoromethanesulfonate **2a** (90 mg, 0.30 mmol) in the presence of TBAF (0.60 mL, 0.60 mmol) in CH<sub>3</sub>CN (2 mL) at 25 °C for 4 h followed by column chromatography afforded

the product **3e** as white solid (32 mg, 61%). *R<sub>f</sub>* (Ethyl acetate/Hexane: 20/80) = 0.50. **Mp** 133-135 °C. <sup>13</sup>C NMR (100 MHz, δ ppm/CDCl<sub>3</sub>): 166.6 (d, *J*<sub>C-F</sub> = 20.8 Hz, C), 135.3 (C), 134.4 (d, *J*<sub>C-F</sub> = 19.1 Hz, C), 130.3 (C), 129.8 (CH), 129.3 (CH), 129.3 (CH), 129.0 (CH), 129.0 (CH), 126.7 (d, *J*<sub>C-F</sub> = 6.4 Hz, CH), 126.7 (d, *J*<sub>C-F</sub> = 6.4 Hz, CH), 121.4 (CH), 121.4 (CH), 92.0 (d, *J*<sub>C-F</sub> = 188.4 Hz, CH). <sup>1</sup>H NMR (400 MHz, δ ppm/CDCl<sub>3</sub>): 8.16 (s, 1H), 7.57-7.53 (m, 2H), 7.52-7.48 (m, 2H), 7.45-7.40 (m, 3H), 7.33-7.29 (m, 2H), 5.90 (d, *J* = 48.8 Hz, 1H). <sup>19</sup>F NMR (376 MHz, δ ppm/CDCl<sub>3</sub>): -175.9 (s). **HRMS** (ESI) *m/z*: [M+H]<sup>+</sup> Calcd for C<sub>14</sub>H<sub>12</sub>ClFNO 264.0586; found 264.0588.

### Compound 3f: *N*-(4-bromophenyl)-2-fluoro-2-phenylacetamide

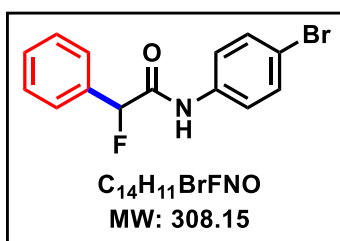

Following the general procedure, the treatment of *N*-(4-bromophenyl)-2-fluoro-3-oxobutanamide **1f** (55 mg, 0.20 mmol) with 2-(trimethylsilyl)phenyl trifluoromethanesulfonate **2a** (90 mg, 0.30 mmol) in the presence of TBAF (0.60 mL, 0.60 mmol) in CH<sub>3</sub>CN (2 mL) at 25 °C for 4 h followed by column chromatography afforded the product **3f** as white solid (37 mg, 60%). *R<sub>f</sub>*

(Ethyl acetate/Hexane: 20/80) = 0.50. **Mp** 160-162 °C. <sup>13</sup>C NMR (100 MHz, δ ppm/CDCl<sub>3</sub>): 166.6 (d, *J*<sub>C-F</sub> = 20.8 Hz, C), 135.8 (C), 134.3 (d, *J*<sub>C-F</sub> = 19.1 Hz, C), 132.3 (CH), 132.3 (CH), 129.8 (CH), 129.0 (CH), 129.0 (CH), 126.7 (d, *J*<sub>C-F</sub> = 6.4 Hz, CH), 126.7 (d, *J*<sub>C-F</sub> = 6.4 Hz, CH), 121.7 (CH), 121.7 (CH), 118.0 (C), 92.0 (d, *J*<sub>C-F</sub> = 188.4 Hz, CH). <sup>1</sup>H NMR (400 MHz, δ ppm/CDCl<sub>3</sub>): 8.19 (s,

1H), 7.54-7.48 (m, 4H), 7.47-7.46 (m, 2H), 7.45-7.40 (m, 3H), 5.89 (d,  $J = 48.4$  Hz, 1H).  $^{19}\text{F}$  NMR (376 MHz,  $\delta$  ppm/ $\text{CDCl}_3$ ): -175.8 (s). HRMS (ESI)  $m/z$ :  $[\text{M}+\text{H}]^+$  Calcd for  $\text{C}_{14}\text{H}_{12}\text{BrFNO}$  308.0081; found 308.0084.

### Compound 3g: 2-Fluoro-*N*-(4-fluorophenyl)-2-phenylacetamide

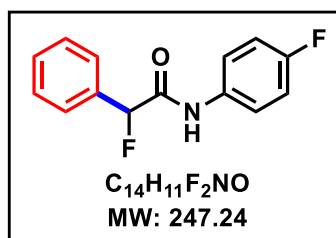

Following the general procedure, the treatment of 2-fluoro-*N*-(4-fluorophenyl)-3-oxobutanamide **1g** (43 mg, 0.20 mmol) with 2-(trimethylsilyl)phenyl trifluoromethanesulfonate **2a** (90 mg, 0.30 mmol) in the presence of TBAF (0.60 mL, 0.60 mmol) in  $\text{CH}_3\text{CN}$  (2 mL) at 25 °C for 4 h followed by column chromatography afforded the product **3g** as white solid (39 mg, 79%).  $R_f$  (Ethyl acetate/Hexane: 20/80) = 0.47. **Mp** 134-136 °C.  $^{13}\text{C}$  NMR (100 MHz,  $\delta$  ppm/ $\text{CDCl}_3$ ): 166.6 (d,  $J_{\text{C-F}} = 16.5$  Hz, C), 160.0 (d,  $J_{\text{C-F}} = 194.3$  Hz, C), 134.5 (d,  $J_{\text{C-F}} = 14.9$  Hz, C), 132.8 (C), 129.8 (CH), 129.0 (CH), 129.0 (CH), 126.7 (d,  $J_{\text{C-F}} = 5.2$  Hz, CH), 126.7 (d,  $J_{\text{C-F}} = 5.2$  Hz, CH), 122.0 (d,  $J_{\text{C-F}} = 6.4$  Hz, CH), 122.0 (d,  $J_{\text{C-F}} = 6.4$  Hz, CH), 116.0 (d,  $J_{\text{C-F}} = 18.0$  Hz, CH), 116.0 (d,  $J_{\text{C-F}} = 18.0$  Hz, CH), 92.0 (d,  $J_{\text{C-F}} = 150.4$  Hz, CH).  $^1\text{H}$  NMR (400 MHz,  $\delta$  ppm/ $\text{CDCl}_3$ ): 8.18 (s, 1H), 7.58-7.53 (m, 2H), 7.53-7.48 (m, 2H), 7.45-7.40 (m, 3H), 7.06-7.0 (m, 2H), 5.89 (d,  $J = 48.4$  Hz, 1H).  $^{19}\text{F}$  NMR (376 MHz,  $\delta$  ppm/ $\text{CDCl}_3$ ): -116.9 (s), -175.8 (s). HRMS (ESI)  $m/z$ :  $[\text{M}+\text{H}]^+$  Calcd for  $\text{C}_{14}\text{H}_{12}\text{F}_2\text{NO}$  248.0881; found 248.0883.

### Compound 3h: *N*-(4-cyanophenyl)-2-fluoro-2-phenylacetamide

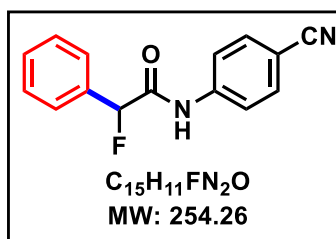

Following the general procedure, the treatment of *N*-(4-cyanophenyl)-2-fluoro-3-oxobutanamide **1h** (44 mg, 0.20 mmol) with 2-(trimethylsilyl)phenyl trifluoromethanesulfonate **2a** (90 mg, 0.30 mmol) in the presence of TBAF (0.60 mL, 0.60 mmol) in  $\text{CH}_3\text{CN}$  (2 mL) at 25 °C for 4 h followed by column chromatography afforded the product **3h** as white solid (34 mg, 67%).  $R_f$  (Ethyl acetate/Hexane: 20/80) = 0.50. **Mp** 175-177 °C.  $^{13}\text{C}$  NMR (100 MHz,  $\delta$  ppm/ $\text{CDCl}_3$ ): 169.0 (d,  $J_{\text{C-F}} = 21.2$  Hz, C), 140.7 (C), 134.0 (d,  $J_{\text{C-F}} = 19.2$  Hz, C), 133.5 (CH), 133.5 (CH), 130.0 (d,  $J_{\text{C-F}} = 2.2$  Hz, CH), 129.0 (CH), 129.0 (CH), 126.6 (d,  $J_{\text{C-F}} = 6.6$  Hz, CH), 126.6 (d,  $J_{\text{C-F}} = 6.6$  Hz, CH), 120.1 (CH), 120.1 (CH), 118.7 (C), 108.3 (C), 92.0 (d,  $J_{\text{C-F}} = 188.6$  Hz, CH).  $^1\text{H}$  NMR (400 MHz,  $\delta$  ppm/ $\text{CDCl}_3$ ): 8.38 (s, 1H), 7.76-7.72 (m, 2H), 7.65-7.61 (m, 2H), 7.51-7.48 (m, 2H), 7.45-7.41 (m, 3H), 5.92 (d,  $J = 48.4$  Hz, 1H).  $^{19}\text{F}$  NMR (376 MHz,  $\delta$  ppm/ $\text{CDCl}_3$ ): -176.3 (s). HRMS (ESI)  $m/z$ :  $[\text{M}+\text{H}]^+$  Calcd for  $\text{C}_{15}\text{H}_{12}\text{FN}_2\text{O}$  255.0928; found 255.0936.

### Compound 3i: *N*-(3-bromophenyl)-2-fluoro-2-phenylacetamide

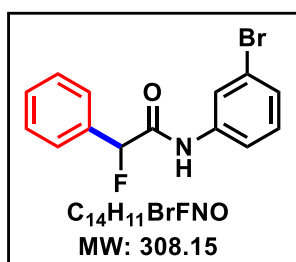

Following the general procedure, the treatment of *N*-(3-bromophenyl)-2-fluoro-3-oxobutanamide **1i** (55 mg, 0.20 mmol) with 2-(trimethylsilyl)phenyl trifluoromethanesulfonate **2a** (90 mg, 0.30 mmol) in the presence of TBAF (0.60 mL, 0.60 mmol) in CH<sub>3</sub>CN (2 mL) at 25 °C for 4 h followed by column chromatography afforded the product **3i** as white solid (45 mg, 73%). *R<sub>f</sub>*(Ethyl acetate/Hexane:

10/90) = 0.40. **Mp** 77-79 °C. <sup>13</sup>C NMR (100 MHz, δ ppm/CDCl<sub>3</sub>): 166.7 (d, *J*<sub>C-F</sub> = 20.8 Hz, C), 138.0 (C), 134.3 (d, *J*<sub>C-F</sub> = 19.1 Hz, C), 130.5 (CH), 129.9 (CH), 129.0 (CH), 129.0 (CH), 128.3 (CH), 126.7 (d, *J*<sub>C-F</sub> = 6.5 Hz, CH), 126.7 (d, *J*<sub>C-F</sub> = 6.5 Hz, CH), 123.1 (CH), 123.0 (C), 118.6 (CH), 92.0 (d, *J*<sub>C-F</sub> = 188.4 Hz, CH). <sup>1</sup>H NMR (400 MHz, δ ppm/CDCl<sub>3</sub>): 8.10 (s, 1H), 7.87 (t, *J* = 2.0 Hz, 1H), 7.53-7.47 (m, 3H), 7.46-7.41 (m, 3H), 7.31-7.28 (m, 1H), 7.20 (t, *J* = 8.0 Hz, 1H), 5.90 (d, *J* = 48.4 Hz, 1H). <sup>19</sup>F NMR (376 MHz, δ ppm/CDCl<sub>3</sub>): -176.2 (s). **HRMS** (ESI) *m/z*: [M+H]<sup>+</sup> Calcd for C<sub>14</sub>H<sub>12</sub>BrFNO 308.0081; found 308.0084.

### Compound 3j: *N*-(3-chlorophenyl)-2-fluoro-2-phenylacetamide

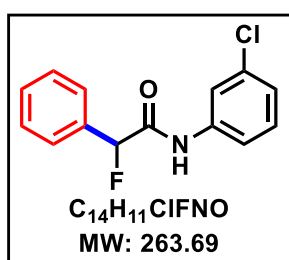

Following the general procedure, the treatment of *N*-(3-chlorophenyl)-2-fluoro-3-oxobutanamide **1j** (46 mg, 0.20 mmol) with 2-(trimethylsilyl)phenyl trifluoromethanesulfonate **2a** (90 mg, 0.30 mmol) in the presence of TBAF (0.60 mL, 0.60 mmol) in CH<sub>3</sub>CN (2 mL) at 25 °C for 4 h followed by column chromatography afforded product **3j** as white solid (34 mg, 65%). *R<sub>f</sub>*(Ethyl acetate/Hexane: 10/90) =

0.37. **Mp** 74-76 °C. <sup>13</sup>C NMR (100 MHz, δ ppm/CDCl<sub>3</sub>): 166.7 (d, *J*<sub>C-F</sub> = 20.9 Hz, C), 137.9 (C), 135.0 (C), 134.3 (d, *J*<sub>C-F</sub> = 19.2 Hz, C), 130.2 (CH), 129.8 (d, *J*<sub>C-F</sub> = 2.3 Hz, CH), 129.0 (CH), 129.0 (CH), 126.7 (d, *J*<sub>C-F</sub> = 6.6 Hz, CH), 126.7 (d, *J*<sub>C-F</sub> = 6.6 Hz, CH), 125.3 (CH), 120.3 (CH), 118.1 (CH), 92.0 (d, *J*<sub>C-F</sub> = 188.4 Hz, CH). <sup>1</sup>H NMR (400 MHz, δ ppm/CDCl<sub>3</sub>): 8.21 (s, 1H), 7.73 (t, *J* = 2.0 Hz, 1H), 7.51-7.48 (m, 2H), 7.45-7.40 (m, 4H), 7.26 (t, *J* = 8.0 Hz, 1H), 7.15-7.12 (m, 1H), 5.89 (d, *J* = 48.4 Hz, 1H). <sup>19</sup>F NMR (376 MHz, δ ppm/CDCl<sub>3</sub>): -175.9 (s). **HRMS** (ESI) *m/z*: [M+H]<sup>+</sup> Calcd for C<sub>14</sub>H<sub>12</sub>ClFNO 264.0586; found 264.0586.

### Compound 3k: 2-Fluoro-2-phenyl-*N*-(3-(trifluoromethyl)phenyl)acetamide

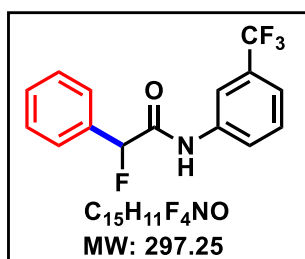

Following the general procedure, the treatment of 2-fluoro-3-oxo-*N*-(3-(trifluoromethyl)phenyl)butanamide **1k** (53 mg, 0.20 mmol) with 2-(trimethylsilyl)phenyl trifluoromethanesulfonate **2a** (90 mg, 0.30 mmol) in the presence of TBAF (0.60 mL, 0.60 mmol) in CH<sub>3</sub>CN (2 mL) at 25 °C for 4 h followed by column chromatography afforded the product **3k** as yellow liquid (36 mg, 60%). *R<sub>f</sub>* (Ethyl

acetate/Hexane: 10/90) = 0.45. <sup>13</sup>C NMR (100 MHz, δ ppm/CDCl<sub>3</sub>): 167.0 (d, *J*<sub>C-F</sub> = 16.8 Hz, C), 137.3 (C), 134.2 (d, *J*<sub>C-F</sub> = 15.2 Hz, C), 131.7 (q, *J*<sub>C-F</sub> = 25.7 Hz, C), 129.9 (CH), 129.8 (CH), 129.0 (CH), 129.0 (CH), 126.7 (d, *J*<sub>C-F</sub> = 5.2 Hz, CH), 126.7 (d, *J*<sub>C-F</sub> = 5.2 Hz, CH), 123.8 (q, *J*<sub>C-F</sub> = 216.8

Hz, C), 123.2 (CH), 121.8 (q,  $J_{C-F}$  = 2.9 Hz, CH), 117.0 (d,  $J_{C-F}$  = 2.8 Hz, CH), 92.0 (d,  $J_{C-F}$  = 150.5 Hz, CH).  $^1\text{H NMR}$  (400 MHz,  $\delta$  ppm/ $\text{CDCl}_3$ ): 8.27 (s, 1H), 7.90 (s, 1H), 7.80 (d,  $J$  = 8.0 Hz, 1H), 7.53-7.50 (m, 2H), 7.49-7.40 (m, 5H), 5.92 (d,  $J$  = 48.0 Hz, 1H).  $^{19}\text{F NMR}$  (376 MHz,  $\delta$  ppm/ $\text{CDCl}_3$ ): -62.8 (s), -176.6 (s). **HRMS** (ESI)  $m/z$ :  $[\text{M}+\text{H}]^+$  Calcd for  $\text{C}_{15}\text{H}_{12}\text{F}_4\text{NO}$  298.0850; found 298.0851.

### Compound 3l: 2-Fluoro-*N*-(3-nitrophenyl)-2-phenylacetamide

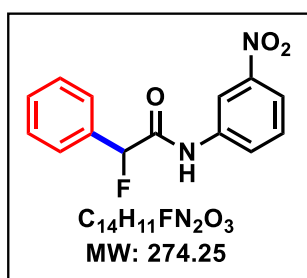

Following the general procedure, the treatment of 2-fluoro-*N*-(3-nitrophenyl)-3-oxobutanamide **1l** (48 mg, 0.20 mmol) with 2-(trimethylsilyl)phenyl trifluoromethanesulfonate **2a** (90 mg, 0.30 mmol) in the presence of TBAF (0.60 mL, 0.60 mmol) in  $\text{CH}_3\text{CN}$  (2 mL) at 25 °C for 4 h followed by column chromatography afforded the product **3l** as white solid (35 mg, 63%).  $R_f$  (Ethyl acetate/Hexane: 20/80) = 0.32. **Mp** 117-119 °C.  $^{13}\text{C NMR}$  (100 MHz,  $\delta$  ppm/ $\text{CDCl}_3$ ): 167.1 (d,  $J_{C-F}$  = 21.3 Hz, C), 148.7 (C), 137.9 (C), 134.0 (d,  $J_{C-F}$  = 19.2 Hz, C), 130.1 (CH), 130.0 (d,  $J_{C-F}$  = 2.3 Hz, CH), 129.0 (CH), 129.0 (CH), 126.6 (d,  $J_{C-F}$  = 6.6 Hz, CH), 126.6 (d,  $J_{C-F}$  = 6.6 Hz, CH), 125.8 (CH), 119.8 (CH), 115.1 (CH), 92.0 (d,  $J_{C-F}$  = 188.5 Hz, CH).  $^1\text{H NMR}$  (400 MHz,  $\delta$  ppm/ $\text{CDCl}_3$ ): 8.50 (s, 1H), 8.38 (s, 1H), 8.14-7.95 (m, 2H), 7.67-7.40 (m, 6H), 5.94 (d,  $J$  = 48.4 Hz, 1H).  $^{19}\text{F NMR}$  (376 MHz,  $\delta$  ppm/ $\text{CDCl}_3$ ): -176.8 (s). **HRMS** (ESI)  $m/z$ :  $[\text{M}-\text{H}]^-$  Calcd for  $\text{C}_{14}\text{H}_{10}\text{FN}_2\text{O}_3$  273.0681; found 273.0675

### Compound 3m: *N*-(2-bromophenyl)-2-fluoro-2-phenylacetamide

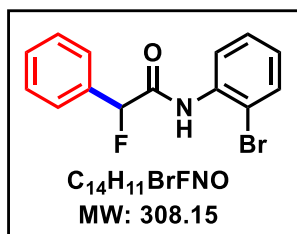

Following the general procedure, the treatment of *N*-(2-bromophenyl)-2-fluoro-3-oxobutanamide **1m** (55 mg, 0.20 mmol) with 2-(trimethylsilyl)phenyl trifluoromethanesulfonate **2a** (90 mg, 0.30 mmol) in the presence of TBAF (0.60 mL, 0.60 mmol) in  $\text{CH}_3\text{CN}$  (2 mL) at 25 °C for 4 h followed by column chromatography afforded the product **3m** as yellow solid (36 mg, 58%).  $R_f$  (Ethyl acetate/Hexane: 5/95) = 0.37. **Mp** 66-68 °C.  $^{13}\text{C NMR}$  (100 MHz,  $\delta$  ppm/ $\text{CDCl}_3$ ): 166.7 (d,  $J_{C-F}$  = 21.1 Hz, C), 134.8 (C), 134.5 (d,  $J_{C-F}$  = 19.3 Hz, C), 132.6 (CH), 129.8 (CH), 129.0 (CH), 129.0 (CH), 128.6 (CH), 126.8 (d,  $J_{C-F}$  = 6.5 Hz, CH), 126.8 (d,  $J_{C-F}$  = 6.5 Hz, CH), 126.1 (CH), 122.0 (CH), 114.0 (C), 92.1 (d,  $J_{C-F}$  = 189.0 Hz, CH).  $^1\text{H NMR}$  (400 MHz,  $\delta$  ppm/ $\text{CDCl}_3$ ): 8.78 (s, 1H), 8.36 (dd,  $J$  = 8.4 Hz, 1.2 Hz, 1H), 7.59-7.53 (m, 3H), 7.46-7.40 (m, 3H), 7.32 (t,  $J$  = 7.2 Hz, 1H), 7.03 (dd,  $J$  = 7.6 Hz, 1.2 Hz, 1H), 5.92 (d,  $J$  = 48.0 Hz, 1H).  $^{19}\text{F NMR}$  (376 MHz,  $\delta$  ppm/ $\text{CDCl}_3$ ): -176.3 (s). **HRMS** (ESI)  $m/z$ :  $[\text{M}+\text{H}]^+$  Calcd for  $\text{C}_{14}\text{H}_{12}\text{BrFNO}$  308.0081; found 308.0070.

### Compound 3n: Methyl 2-(2-fluoro-2-phenylacetamido)benzoate

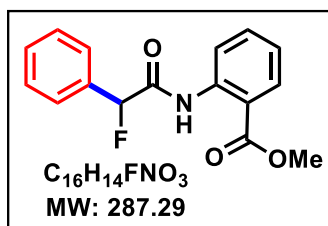

Following the general procedure, the treatment of methyl 2-(2-fluoro-3-oxobutanamido)benzoate **1n** (51 mg, 0.20 mmol) with 2-(trimethylsilyl)phenyl trifluoromethanesulfonate **2a** (90 mg, 0.30 mmol) in the presence of TBAF (0.60 mL, 0.60 mmol) in  $CH_3CN$  (2 mL) at 25 °C for 4 h followed by column chromatography afforded the product **3n** as brown solid (38 mg, 67%).  $R_f$  (Ethyl acetate/Hexane: 10/90) = 0.40. **Mp** 83-85 °C.  $^{13}C$  NMR (100 MHz,  $\delta$  ppm/ $CDCl_3$ ): 168.5 (C), 167.6 (d,  $J_{C-F}$  = 21.3 Hz, C), 140.4 (C), 134.9 (d,  $J_{C-F}$  = 19.6 Hz, C), 134.8 (CH), 131.1 (CH), 129.5 (d,  $J_{C-F}$  = 2.1 Hz, CH), 128.8 (CH), 128.8 (CH), 126.6 (d,  $J_{C-F}$  = 6.7 Hz, CH), 126.6 (d,  $J_{C-F}$  = 6.7 Hz, CH), 123.5 (CH), 120.6 (CH), 116.0 (C), 92.0 (d,  $J_{C-F}$  = 190.2 Hz, CH), 52.7 ( $CH_3$ ).  $^1H$  NMR (400 MHz,  $\delta$  ppm/ $CDCl_3$ ): 12.05 (s, 1H), 8.72 (dd,  $J$  = 8.4 Hz, 0.8 Hz, 1H), 8.07 (dd,  $J$  = 8.0 Hz, 1.6 Hz, 1H), 7.58-7.52 (m, 3H), 7.44-7.37 (m, 3H), 7.16-7.12 (m, 1H), 5.90 (d,  $J$  = 48.0 Hz, 1H), 3.98 (s, 3H).  $^{19}F$  NMR (376 MHz,  $\delta$  ppm/ $CDCl_3$ ): -178.1 (s). HRMS (ESI)  $m/z$ :  $[M+H]^+$  Calcd for  $C_{16}H_{15}FNO_3$  288.1030; found 288.1022.

### Compound 3o: 2-Fluoro-N-(2-nitrophenyl)-2-phenylacetamide

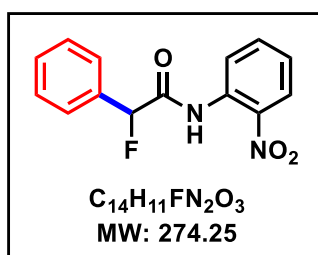

Following the general procedure, the treatment of 2-fluoro-N-(2-nitrophenyl)-3-oxobutanamide **1o** (48 mg, 0.20 mmol) with 2-(trimethylsilyl)phenyl trifluoromethanesulfonate **2a** (90 mg, 0.30 mmol) in the presence of TBAF (0.60 mL, 0.60 mmol) in  $CH_3CN$  (2 mL) at 25 °C for 4 h followed by column chromatography afforded the product **3o** as white solid (40 mg, 71%).  $R_f$  (Ethyl acetate/Hexane: 10/90) = 0.35. **Mp** 93-95 °C.  $^{13}C$  NMR (100 MHz,  $\delta$  ppm/ $CDCl_3$ ): 167.8 (d,  $J_{C-F}$  = 21.7 Hz, C), 137.0 (C), 136.1 (CH), 134.3 (d,  $J_{C-F}$  = 19.7 Hz, C), 133.8 (C), 129.9 (d,  $J_{C-F}$  = 2.0 Hz, CH), 129.0 (CH), 129.0 (CH), 126.5 (d,  $J_{C-F}$  = 6.8 Hz, CH), 126.5 (d,  $J_{C-F}$  = 6.8 Hz, CH), 126.1 (CH), 124.3 (CH), 122.3 (CH), 91.9 (d,  $J_{C-F}$  = 190.4 Hz, CH).  $^1H$  NMR (400 MHz,  $\delta$  ppm/ $CDCl_3$ ): 11.34 (s, 1H), 8.78 (dd,  $J$  = 8.8 Hz, 1.2 Hz, 1H), 8.27 (dd,  $J$  = 8.4 Hz, 1.6 Hz, 1H), 7.69-7.64 (m, 1H), 7.56-7.53 (m, 2H), 7.46-7.41 (m, 3H), 7.27-7.23 (m, 1H), 5.93 (d,  $J$  = 48.0 Hz, 1H).  $^{19}F$  NMR (376 MHz,  $\delta$  ppm/ $CDCl_3$ ): -178.8 (s). HRMS (ESI)  $m/z$ :  $[M-H]^-$  Calcd for  $C_{14}H_{10}FN_2O_3$  273.0681; found 273.0677.

### Compound 3p: N-(benzo[d][1,3]dioxol-5-yl)-2-fluoro-2-phenylacetamide

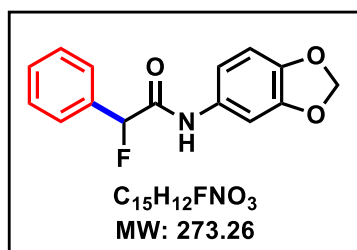

Following the general procedure, the treatment of N-(benzo[d][1,3]dioxol-5-yl)-2-fluoro-3-oxobutanamide **1p** (48 mg, 0.20 mmol) with 2-(trimethylsilyl)phenyl trifluoromethanesulfonate **2a** (90 mg, 0.30 mmol) in the presence of TBAF (0.60 mL, 0.60 mmol) in  $CH_3CN$  (2 mL) at 25 °C for 4 h followed by column chromatography afforded the product **3p** as grey solid (35 mg, 64%).  $R_f$  (Ethyl acetate/Hexane: 20/80) = 0.40. **Mp** 104-106 °C.  $^{13}C$  NMR

(100 MHz,  $\delta$  ppm/ $\text{CDCl}_3$ ): 166.4 (d,  $J_{\text{C-F}} = 20.8$  Hz, C), 148.0 (C), 144.9 (C), 134.6 (d,  $J_{\text{C-F}} = 19.1$  Hz, C), 130.9 (C), 129.7 (CH), 128.9 (CH), 128.9 (CH), 126.8 (d,  $J_{\text{C-F}} = 6.4$  Hz, CH), 126.8 (d,  $J_{\text{C-F}} = 6.4$  Hz, CH), 113.5 (CH), 108.3 (CH), 102.9 (CH), 101.5 ( $\text{CH}_2$ ), 91.9 (d,  $J_{\text{C-F}} = 188.2$  Hz, CH).  **$^1\text{H}$  NMR** (400 MHz,  $\delta$  ppm/ $\text{CDCl}_3$ ): 8.10 (s, 1H), 7.52-7.48 (m, 2H), 7.45-7.41 (m, 3H), 7.29 (d,  $J = 2.0$  Hz, 1H), 6.88 (dd,  $J = 8.4$  Hz, 2.0 Hz, 1H), 6.76 (d,  $J = 8.4$  Hz, 1H), 5.95 (s, 2H), 5.87 (d,  $J = 48.8$  Hz, 1H).  **$^{19}\text{F}$  NMR** (376 MHz,  $\delta$  ppm/ $\text{CDCl}_3$ ): -175.5 (s). **HRMS** (ESI)  $m/z$ :  $[\text{M}+\text{H}]^+$  Calcd for  $\text{C}_{15}\text{H}_{13}\text{FNO}_3$  274.0874; found 274.0868.

### Compound 3q: *N*-(2,4-difluorophenyl)-2-fluoro-2-phenylacetamide

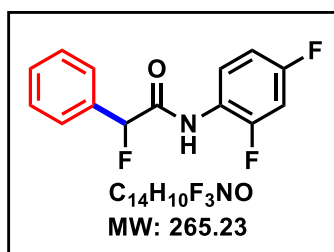

Following the general procedure, the treatment of *N*-(2,4-difluorophenyl)-2-fluoro-3-oxobutanamide **1q** (46 mg, 0.20 mmol) with 2-(trimethylsilyl)phenyl trifluoromethanesulfonate **2a** (90 mg, 0.30 mmol) in the presence of TBAF (0.60 mL, 0.60 mmol) in  $\text{CH}_3\text{CN}$  (2 mL) at 25 °C for 4 h followed by column chromatography afforded the product **3q** as yellow solid (33 mg, 63%).

$R_f$  (Ethyl acetate/Hexane: 15/85) = 0.50. **Mp** 77-79 °C.  **$^{13}\text{C}$  NMR** (100 MHz,  $\delta$  ppm/ $\text{CDCl}_3$ ): 166.7 (d,  $J_{\text{C-F}} = 17.0$  Hz, C), 159.2 (dd,  $J_{\text{C-F}} = 196.4$  Hz, 9.1 Hz, C), 153.0 (dd,  $J_{\text{C-F}} = 196.4$  Hz, 9.4 Hz, C), 134.3 (d,  $J_{\text{C-F}} = 15.3$  Hz, C), 129.8 (d,  $J_{\text{C-F}} = 1.7$  Hz, CH), 129.0 (CH), 129.0 (CH), 126.7 (d,  $J_{\text{C-F}} = 5.3$  Hz, CH), 126.7 (d,  $J_{\text{C-F}} = 5.3$  Hz, CH), 123.1 (dd,  $J_{\text{C-F}} = 7.2$  Hz, 1.0 Hz, CH), 121.6 (dd,  $J_{\text{C-F}} = 7.9$  Hz, 2.9 Hz, C), 111.5 (dd,  $J_{\text{C-F}} = 17.4$  Hz, 3.0 Hz, CH), 103.9 (dd,  $J_{\text{C-F}} = 21.3$  Hz, 18.4 Hz, CH), 92.0 (d,  $J_{\text{C-F}} = 150.6$  Hz, CH).  **$^1\text{H}$  NMR** (400 MHz,  $\delta$  ppm/ $\text{CDCl}_3$ ): 8.32 (s, 1H), 8.29-8.23 (m, 1H), 7.54-7.50 (m, 2H), 7.47-7.41 (m, 3H), 6.94-6.85 (m, 2H), 5.92 (d,  $J = 48.4$  Hz, 1H).  **$^{19}\text{F}$  NMR** (376 MHz,  $\delta$  ppm/ $\text{CDCl}_3$ ): -113.7 (d,  $J_{\text{F-F}} = 4.9$  Hz), -125.6 (d,  $J_{\text{F-F}} = 5.3$  Hz), -176.5 (s). **HRMS** (ESI)  $m/z$ :  $[\text{M}+\text{H}]^+$  Calcd for  $\text{C}_{14}\text{H}_{11}\text{F}_3\text{NO}$  266.0787; found 266.0777.

### Compound 3r: *N*-(2,4-dinitrophenyl)-2-fluoro-2-phenylacetamide

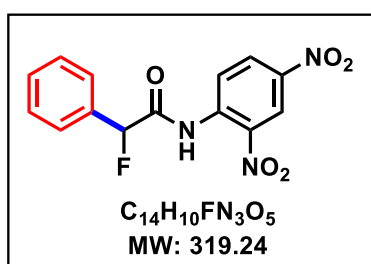

Following the general procedure, the treatment of *N*-(2,4-dinitrophenyl)-2-fluoro-3-oxobutanamide **1r** (57 mg, 0.20 mmol) with 2-(trimethylsilyl)phenyl trifluoromethanesulfonate **2a** (90 mg, 0.30 mmol) in the presence of TBAF (0.60 mL, 0.60 mmol) in  $\text{CH}_3\text{CN}$  (2 mL) at 25 °C for 4 h followed by column chromatography afforded the product **3r** as yellow

solid (31 mg, 49%).  $R_f$  (Ethyl acetate/Hexane: 15/85) = 0.47. **Mp** 111-113 °C.  **$^{13}\text{C}$  NMR** (100 MHz,  $\delta$  ppm/ $\text{CDCl}_3$ ): 168.3 (d,  $J_{\text{C-F}} = 22.1$  Hz, C), 142.6 (C), 138.7 (C), 135.9 (C), 133.5 (d,  $J_{\text{C-F}} = 19.8$  Hz, C), 130.3 (CH), 130.2 (d,  $J_{\text{C-F}} = 1.9$  Hz, CH), 129.2 (CH), 129.2 (CH), 126.3 (d,  $J_{\text{C-F}} = 7.0$  Hz, CH), 126.3 (d,  $J_{\text{C-F}} = 7.0$  Hz, CH), 122.6 (CH), 122.2 (CH), 91.8 (d,  $J_{\text{C-F}} = 190.6$  Hz, CH).  **$^1\text{H}$  NMR** (400 MHz,  $\delta$  ppm/ $\text{CDCl}_3$ ): 11.62 (s, 1H), 9.17 (d,  $J = 2.8$  Hz, 1H), 9.09 (d,  $J = 9.6$  Hz, 1H), 8.49 (dd,  $J = 9.6$  Hz, 2.8 Hz, 1H), 7.54-7.52 (m, 2H), 7.49-7.44 (m, 3H), 5.99 (d,  $J = 48.0$  Hz, 1H).  **$^{19}\text{F}$  NMR** (376 MHz,  $\delta$  ppm/ $\text{CDCl}_3$ ): -179.9 (s). **HRMS** (ESI)  $m/z$ :  $[\text{M}+\text{H}]^+$  Calcd for  $\text{C}_{14}\text{H}_{11}\text{FN}_3\text{O}_5$  320.0677; found 320.0679.



### Compound 3s: 2-Fluoro-*N*-mesityl-2-phenylacetamide

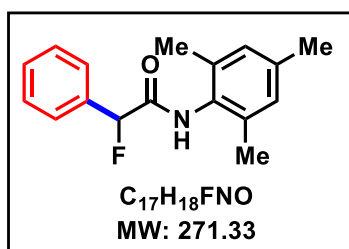

Following the general procedure, the treatment of 2-fluoro-*N*-mesityl-3-oxobutanamide **1s** (47 mg, 0.20 mmol) with 2-(trimethylsilyl)phenyl trifluoromethanesulfonate **2a** (90 mg, 0.30 mmol) in the presence of TBAF (0.60 mL, 0.60 mmol) in  $CH_3CN$  (2 mL) at 25 °C for 4 h followed by column chromatography afforded the product **3s** as white solid (36 mg, 66%).  $R_f$  (Ethyl acetate/Hexane: 20/80) = 0.45. **Mp** 128-130 °C.  $^{13}C$  NMR (100 MHz,  $\delta$  ppm/ $CDCl_3$ ): 167.1 (d,  $J_{C-F}$  = 21.4 Hz, C), 137.4 (C), 135.2 (C), 135.2 (C), 135.0 (d,  $J_{C-F}$  = 19.2 Hz, C), 129.7 (C), 129.5 (d,  $J_{C-F}$  = 2.2 Hz, CH), 129.1 (CH), 129.1 (CH), 128.8 (CH), 128.8 (CH), 126.5 (d,  $J_{C-F}$  = 6.6 Hz, CH), 126.5 (d,  $J_{C-F}$  = 6.6 Hz, CH), 93.5 (d,  $J_{C-F}$  = 187.0 Hz, CH), 21.0 (CH<sub>3</sub>), 18.3 (CH<sub>3</sub>), 18.3 (CH<sub>3</sub>).  $^1H$  NMR (400 MHz,  $\delta$  ppm/ $CDCl_3$ ): 7.71 (s, 1H), 7.58-7.55 (m, 2H), 7.46-7.41 (m, 3H), 6.90 (s, 2H), 5.96 (d,  $J$  = 48.4 Hz, 1H), 2.28 (s, 3H), 2.14 (s, 6H).  $^{19}F$  NMR (376 MHz,  $\delta$  ppm/ $CDCl_3$ ): -176.8 (s). **HRMS** (ESI)  $m/z$ :  $[M+H]^+$  Calcd for  $C_{17}H_{19}FNO$  272.1445; found: 272.1440.

### Compound 3t: 2-Fluoro-2-phenyl-*N*-(pyridin-2-yl)acetamide

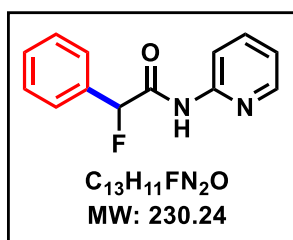

Following the general procedure, the treatment of 2-fluoro-3-oxo-*N*-(pyridin-2-yl)butanamide **1t** (39 mg, 0.20 mmol) with 2-(trimethylsilyl)phenyl trifluoromethanesulfonate **2a** (90 mg, 0.30 mmol) in the presence of TBAF (0.60 mL, 0.60 mmol) in  $CH_3CN$  (2 mL) at 25 °C for 4 h followed by column chromatography afforded the product **3t** as brown solid (25 mg, 54%).  $R_f$  (Ethyl acetate/Hexane: 10/90) = 0.22.

**Mp** 104-106 °C.  $^{13}C$  NMR (100 MHz,  $\delta$  ppm/ $CDCl_3$ ): 167.2 (d,  $J_{C-F}$  = 21.8 Hz, C), 150.4 (C), 148.1 (CH), 138.6 (CH), 134.4 (d,  $J_{C-F}$  = 19.4 Hz, C), 129.7 (d,  $J_{C-F}$  = 2.2 Hz, CH), 128.9 (CH), 128.9 (CH), 126.6 (d,  $J_{C-F}$  = 6.6 Hz, CH), 126.6 (d,  $J_{C-F}$  = 6.6 Hz, CH), 120.7 (CH), 114.3 (CH), 91.7 (d,  $J_{C-F}$  = 189.3 Hz, CH).  $^1H$  NMR (400 MHz,  $\delta$  ppm/ $CDCl_3$ ): 8.9 (s, 1H), 8.32 (s, 1H), 8.22 (d,  $J$  = 8.0 Hz, 1H), 7.73-7.68 (m, 1H), 7.53-7.50 (m, 2H), 7.40-7.39 (m, 3H), 7.10-7.06 (m, 1H), 5.90 (d,  $J$  = 48.0 Hz, 1H).  $^{19}F$  NMR (376 MHz,  $\delta$  ppm/ $CDCl_3$ ): -177.4 (s). **HRMS** (ESI)  $m/z$ :  $[M+H]^+$  Calcd for  $C_{13}H_{12}FN_2O$  231.0928; found 231.0925.

### Compound 3u: 2-Fluoro-2-phenyl-*N*-(pyrazin-2-yl)acetamide

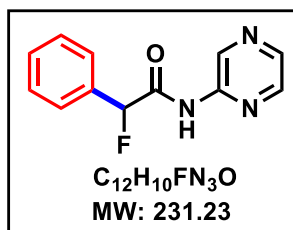

Following the general procedure, the treatment of 2-fluoro-3-oxo-*N*-(pyrazin-2-yl)butanamide **1u** (39 mg, 0.20 mmol) with 2-(trimethylsilyl)phenyl trifluoromethanesulfonate **2a** (90 mg, 0.30 mmol) in the presence of TBAF (0.60 mL, 0.60 mmol) in  $CH_3CN$  (2 mL) at 25 °C for 4 h followed by column chromatography afforded the product **3u** as yellow solid (21 mg, 46%).  $R_f$  (Ethyl acetate/Hexane: 30/70) =

0.32. **Mp** 116-118 °C.  $^{13}C$  NMR (100 MHz,  $\delta$  ppm/ $CDCl_3$ ): 167.2 (d,  $J_{C-F}$  = 22.2 Hz, C), 147.2 (C), 142.4 (CH), 141.2 (CH), 137.2 (CH), 134.0 (d,  $J_{C-F}$  = 19.4 Hz, C), 130.0 (d,  $J_{C-F}$  = 2.1 Hz, CH), 129.0 (CH), 129.0 (CH), 126.6 (d,  $J_{C-F}$  = 6.7 Hz, CH), 126.6 (d,  $J_{C-F}$  = 6.7 Hz, CH), 91.7 (d,  $J_{C-F}$  = 189.3 Hz,

CH).  $^1\text{H NMR}$  (400 MHz,  $\delta$  ppm/ $\text{CDCl}_3$ ): 9.55 (s, 1H), 8.84 (s, 1H), 8.40 (d,  $J = 2.0$  Hz, 1H), 8.30 (s, 1H), 7.52-7.49 (m, 2H), 7.45-7.41 (m, 3H), 5.95 (d,  $J = 48.0$  Hz, 1H).  $^{19}\text{F NMR}$  (376 MHz,  $\delta$  ppm/ $\text{CDCl}_3$ ): -177.5 (s). **HRMS** (ESI)  $m/z$ :  $[\text{M}+\text{H}]^+$  Calcd for  $\text{C}_{12}\text{H}_{11}\text{FN}_3\text{O}$  232.0881; found 232.0881.

### Compound 3v: 2-Fluoro-2-phenyl-*N*-(quinolin-8-yl)acetamide

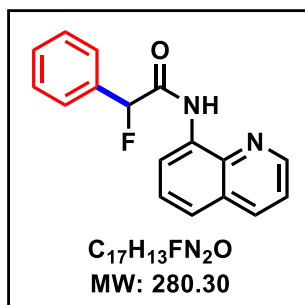

Following the general procedure, the treatment of 2-fluoro-3-oxo-*N*-(quinolin-8-yl)butanamide **1v** (49 mg, 0.20 mmol) with 2-(trimethylsilyl)phenyl trifluoromethanesulfonate **2a** (90 mg, 0.30 mmol) in the presence of TBAF (0.60 mL, 0.60 mmol) in  $\text{CH}_3\text{CN}$  (2 mL) at 25 °C for 4 h followed by column chromatography afforded the product **3v** as white solid (32 mg, 58%).  $R_f$  (Ethyl acetate/Hexane: 10/90) = 0.35. **Mp** 91-33 °C.  $^{13}\text{C NMR}$  (100 MHz,  $\delta$  ppm/ $\text{CDCl}_3$ ): 167.0 (d,  $J_{\text{C-F}} = 17.0$  Hz, C), 148.8 (CH), 138.9 (C), 136.4 (CH), 135.1 (d,  $J_{\text{C-F}} = 15.5$  Hz, C), 133.6 (C), 129.6 (CH), 128.9 (CH), 128.9 (CH), 128.1 (C), 127.2 (CH), 126.8 (d,  $J_{\text{C-F}} = 5.1$  Hz, CH), 126.8 (d,  $J_{\text{C-F}} = 5.1$  Hz, CH), 122.6 (CH), 122.0 (CH), 117.0 (CH), 92.2 (d,  $J_{\text{C-F}} = 151.3$  Hz, CH).  $^1\text{H NMR}$  (400 MHz,  $\delta$  ppm/ $\text{CDCl}_3$ ): 10.88 (s, 1H), 8.88 (dd,  $J = 4.4$  Hz, 1.6 Hz, 1H), 8.80 (dd,  $J = 6.8$  Hz, 2.4 Hz, 1H), 8.16 (dd,  $J = 8.0$  Hz, 1.6 Hz, 1H), 7.65-7.60 (m, 2H), 7.57-7.51 (m, 2H), 7.49-7.46 (m, 1H), 7.45-7.38 (m, 3H), 6.01 (d,  $J = 48.4$  Hz, 1H).  $^{19}\text{F NMR}$  (376 MHz,  $\delta$  ppm/ $\text{CDCl}_3$ ): -176.4 (s). **HRMS** (ESI)  $m/z$ :  $[\text{M}+\text{H}]^+$  Calcd for  $\text{C}_{17}\text{H}_{14}\text{FN}_2\text{O}$  281.1085; found 281.1080.

### Compound 3w and 3w': 2-Fluoro-2-(4-methoxyphenyl)-*N*-phenylacetamide and 2-fluoro-2-(3-methoxyphenyl)-*N*-phenylacetamide

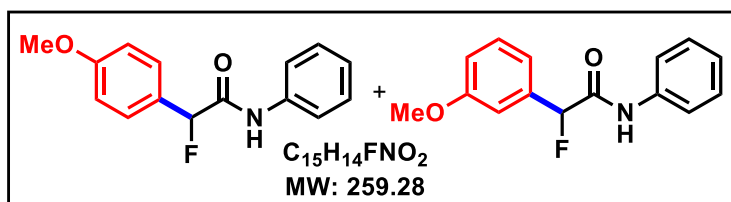

Following the general procedure, the treatment of 2-fluoro-3-oxo-*N*-phenylbutanamide **1a** (39 mg, 0.20 mmol) with 4-methoxy-2-(trimethylsilyl)phenyl trifluoromethanesulfonate **2b** (98 mg, 0.30 mmol) in the presence of TBAF (0.60 mL, 0.60 mmol) in  $\text{CH}_3\text{CN}$  (2 mL) at 25 °C for 4 h followed by column chromatography afforded the product **3w** and **3w'** as a 1:1 mixture of regioisomers as white solid (32 mg, 61%). Compound **3w**:  $R_f$  (Ethyl acetate/Hexane: 20/80) = 0.40. **Mp** 75-77 °C.  $^{13}\text{C NMR}$  (100 MHz,  $\delta$  ppm/ $\text{CDCl}_3$ ): 166.4 (d,  $J_{\text{C-F}} = 20.4$  Hz, C), 160.0 (C), 136.7 (C), 136.0 (d,  $J_{\text{C-F}} = 19.2$  Hz, C), 130.0 (CH), 129.3 (CH), 129.3 (CH), 125.2 (CH), 120.2 (CH), 120.2 (CH), 118.9 (d,  $J_{\text{C-F}} = 6.8$  Hz, CH), 115.4 (d,  $J_{\text{C-F}} = 1.8$  Hz, CH), 112.3 (d,  $J_{\text{C-F}} = 7.0$  Hz, CH), 91.9 (d,  $J_{\text{C-F}} = 189.1$  Hz, CH), 55.5 ( $\text{CH}_3$ ).  $^1\text{H NMR}$  (400 MHz,  $\delta$  ppm/ $\text{CDCl}_3$ ): 8.14 (s, 1H), 7.61-7.59 (m, 1H), 7.58-7.56 (m, 1H), 7.37-7.31 (m, 3H), 7.16 (t,  $J = 7.6$  Hz, 1H), 7.11 (d,  $J = 7.6$  Hz, 1H), 7.05 (s, 1H), 6.95-6.93 (m, 1H), 5.86 (d,  $J = 48.4$  Hz, 1H), 3.82 (s, 3H).  $^{19}\text{F NMR}$  (376 MHz,  $\delta$  ppm/ $\text{CDCl}_3$ ): -176.2 (s). **HRMS** (ESI)  $m/z$ :  $[\text{M}+\text{H}]^+$  Calcd for  $\text{C}_{15}\text{H}_{15}\text{FNO}_2$  260.1081; found 260.1085. Compound **3w'**:  $R_f$  (Ethyl acetate/Hexane: 20/80) = 0.37. **Mp** 94-96 °C.  $^{13}\text{C NMR}$  (100 MHz,  $\delta$  ppm/ $\text{CDCl}_3$ ): 166.8 (d,  $J_{\text{C-F}} = 21.3$  Hz, C), 160.8 (d,  $J_{\text{C-F}} = 2.6$  Hz, C), 136.8 (C), 129.3 (CH), 129.3 (CH), 128.8 (d,  $J_{\text{C-F}} = 5.4$  Hz, CH), 128.8 (d,  $J_{\text{C-F}} = 5.4$



Hz, CH), 126.7 (d,  $J_{C-F}$  = 19.6 Hz, C), 125.2 (CH), 120.1 (CH), 120.1 (CH), 114.4 (CH), 114.4 (CH), 92.0 (d,  $J_{C-F}$  = 187.0 Hz, CH), 55.5 (CH<sub>3</sub>). **<sup>1</sup>H NMR** (400 MHz,  $\delta$  ppm/CDCl<sub>3</sub>): 8.19 (s, 1H), 7.62-7.59 (m, 2H), 7.45-7.41 (m, 2H), 7.38-7.34 (m, 2H), 7.19-7.14 (m, 1H), 6.95-6.91 (m, 2H), 5.84 (d,  $J$  = 49.2 Hz, 1H), 3.82 (s, 3H). **<sup>19</sup>F NMR** (376 MHz,  $\delta$  ppm/CDCl<sub>3</sub>): -169.4 (s). **HRMS** (ESI)  $m/z$ : [M+H]<sup>+</sup> Calcd for C<sub>15</sub>H<sub>15</sub>FNO<sub>2</sub> 260.1081; found 260.1086.

### Compound 3x and 3x': 2-Fluoro-*N*-phenyl-2-(*p*-tolyl)acetamide and 2-fluoro-*N*-phenyl-2-(*m*-tolyl)acetamide

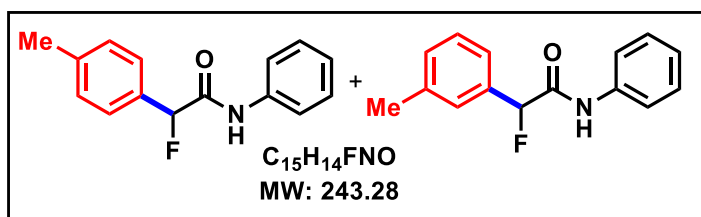

Following the general procedure, the treatment of 2-fluoro-3-oxo-*N*-phenylbutanamide **1a** (39 mg, 0.20 mmol) with 4-methyl-2-(trimethylsilyl)phenyl trifluoromethanesul-

fonate **2c** (94 mg, 0.30 mmol) in the presence of TBAF (0.60 mL, 0.60 mmol) in CH<sub>3</sub>CN (2 mL) at 25 °C for 4 h followed by column chromatography afforded the product **3x** and **3x'** as a 1:1 mixture of regioisomers as white solid (33 mg, 68%). Compound **3x**:  $R_f$  (Ethyl acetate/Hexane: 20/80) = 0.50. **Mp** 74-76 °C. **<sup>13</sup>C NMR** (100 MHz,  $\delta$  ppm/CDCl<sub>3</sub>): 166.7 (d,  $J_{C-F}$  = 20.4 Hz, C), 139.8 (C), 136.8 (C), 134.5 (d,  $J_{C-F}$  = 19.1 Hz, C), 129.6 (CH), 129.6 (CH), 129.2 (CH), 129.2 (CH), 128.8 (CH), 128.8 (CH), 125.1 (CH), 120.1 (CH), 120.1 (CH), 92.1 (d,  $J_{C-F}$  = 188.2 Hz, CH), 21.5 (CH<sub>3</sub>). **<sup>1</sup>H NMR** (400 MHz,  $\delta$  ppm/CDCl<sub>3</sub>): 8.20 (s, 1H), 7.61 (s, 1H), 7.59 (s, 1H), 7.41-7.30 (m, 5H), 7.23 (d, 6.8 Hz, 1H), 7.16 (t,  $J$  = 7.6 Hz, 1H), 5.86 (d,  $J$  = 48.8 Hz, 1H), 2.38 (s, 3H). **<sup>19</sup>F NMR** (376 MHz,  $\delta$  ppm/CDCl<sub>3</sub>): -174.5 (s). Compound **3x'**: **<sup>13</sup>C NMR** (100 MHz,  $\delta$  ppm/CDCl<sub>3</sub>): 166.6 (d,  $J_{C-F}$  = 20.6 Hz, C), 138.7 (C), 136.8 (C), 134.5 (d,  $J_{C-F}$  = 19.1 Hz, C), 130.5 (CH), 129.2 (CH), 129.2 (CH), 127.5 (d, 6.2 Hz, CH), 127.0 (d, 6.0 Hz, CH), 125.1 (CH), 123.9 (d, 6.4 Hz, CH), 120.1 (CH), 120.1 (CH), 92.0 (d,  $J_{C-F}$  = 187.8 Hz, CH), 21.4 (CH<sub>3</sub>). **<sup>1</sup>H NMR** (400 MHz,  $\delta$  ppm/CDCl<sub>3</sub>): 8.2 (s, 1H), 7.61 (s, 1H), 7.59 (s, 1H), 7.41-7.30 (m, 5H), 7.23 (d, 6.8 Hz, 1H), 7.16 (t,  $J$  = 7.6 Hz, 1H), 5.86 (d,  $J$  = 48.8 Hz, 1H), 2.38 (s, 3H). **<sup>19</sup>F NMR** (376 MHz,  $\delta$  ppm/CDCl<sub>3</sub>): -172.9 (s). **HRMS** (ESI)  $m/z$ : [M+H]<sup>+</sup> Calcd for C<sub>15</sub>H<sub>15</sub>FNO 244.1132; found 244.1134

### Compound 3y: 2-Fluoro-*N*-phenyl-2-(*m*-tolyl)acetamide

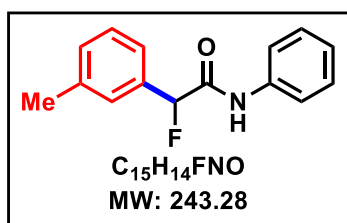

Following the general procedure, the treatment of 2-fluoro-3-oxo-*N*-phenylbutanamide **1a** (39 mg, 0.20 mmol) with 3-methyl-2-(trimethylsilyl)phenyl trifluoromethanesulfonate **2d** (94 mg, 0.30 mmol) in the presence of TBAF (0.60 mL, 0.60 mmol) in CH<sub>3</sub>CN (2 mL) at 25 °C for 4 h followed by column chromatography afforded the product **3y** as white solid (34 mg, 70%).  $R_f$

(Ethyl acetate/Hexane: 20/80) = 0.50. **Mp** 102-104 °C. **<sup>13</sup>C NMR** (100 MHz,  $\delta$  ppm/CDCl<sub>3</sub>): 166.6 (d,  $J_{C-F}$  = 20.7 Hz, C), 138.7 (C), 136.8 (C), 134.5 (d,  $J_{C-F}$  = 18.8 Hz, C), 130.5 (d,  $J_{C-F}$  = 2.4 Hz, CH), 129.4 (CH), 129.4 (CH), 128.8 (CH), 127.5 (d,  $J_{C-F}$  = 6.3 Hz, CH), 125.1 (CH), 123.9 (d,  $J_{C-F}$  = 6.5 Hz, CH), 120.1 (CH), 120.1 (CH), 92.1 (d,  $J_{C-F}$  = 188.0 Hz, CH), 21.5 (CH<sub>3</sub>). **<sup>1</sup>H NMR** (400 MHz,  $\delta$  ppm/CDCl<sub>3</sub>): 8.21 (s, 1H), 7.62 (s, 1H), 7.60 (s, 1H), 7.38-7.31 (m, 5H), 7.24-7.21 (m,

1H), 7.17 (t,  $J = 7.6$  Hz, 1H), 5.86 (d,  $J = 48.4$  Hz, 1H), 2.38 (s, 3H).  $^{19}\text{F}$  NMR (376 MHz,  $\delta$  ppm/ $\text{CDCl}_3$ ): -174.5 (s). HRMS (ESI)  $m/z$ :  $[\text{M}+\text{H}]^+$  Calcd for  $\text{C}_{15}\text{H}_{15}\text{FNO}$  244.1132; found 244.1135.

### Compound 3z: 2-(3,4-Dimethoxyphenyl)-2-fluoro-*N*-phenylacetamide

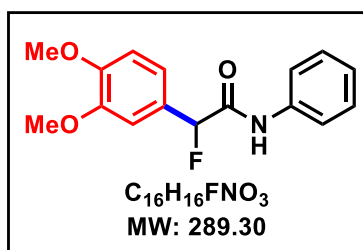

Following the general procedure, the treatment of 2-fluoro-3-oxo-*N*-phenylbutanamide **1a** (39 mg, 0.20 mmol) with 4,5-dimethoxy-2-(trimethylsilyl)phenyl trifluoromethanesulfonate **2e** (107 mg, 0.30 mmol) in the presence of TBAF (0.60 mL, 0.60 mmol) in  $\text{CH}_3\text{CN}$  (2 mL) at 25 °C for 4 h followed by column chromatography afforded the product **3z** as white solid (35 mg, 61%).

$R_f$  (Ethyl acetate/Hexane: 20/80) = 0.22. **Mp** 115-117 °C.  $^{13}\text{C}$  NMR (100 MHz,  $\delta$  ppm/ $\text{CDCl}_3$ ): 166.7 (d,  $J_{\text{C-F}} = 21.4$  Hz, C), 150.3 (d,  $J_{\text{C-F}} = 2.6$  Hz, C), 149.3 (C), 136.8 (C), 129.2 (CH), 129.2 (CH), 127.0 (d,  $J_{\text{C-F}} = 19.6$  Hz, C), 125.1 (CH), 120.1 (CH), 120.1 (CH), 120.0 (d,  $J_{\text{C-F}} = 6.8$  Hz, CH), 111.3 (CH), 110.1 (d,  $J_{\text{C-F}} = 5.5$  Hz, CH), 92.0 (d,  $J_{\text{C-F}} = 187.7$  Hz, CH), 56.0 ( $\text{CH}_3$ ), 56.0 ( $\text{CH}_3$ ).  $^1\text{H}$  NMR (400 MHz,  $\delta$  ppm/ $\text{CDCl}_3$ ): 8.20 (s, 1H), 7.61 (s, 1H), 7.59 (s, 1H), 7.35 (t,  $J = 8.0$  Hz, 2H), 7.16 (t,  $J = 7.2$  Hz, 1H), 7.06 (d,  $J = 8.0$  Hz, 1H), 7.0 (s, 1H), 6.88 (d,  $J = 8.4$  Hz, 1H), 5.83 (d,  $J = 48.4$  Hz, 1H), 3.88 (s, 6H).  $^{19}\text{F}$  NMR (376 MHz,  $\delta$  ppm/ $\text{CDCl}_3$ ): -171.0 (s). HRMS (ESI)  $m/z$ :  $[\text{M}+\text{H}]^+$  Calcd for  $\text{C}_{16}\text{H}_{17}\text{FNO}_3$  290.1187; found 290.1180.

### Compound 3aa: 2-fluoro-2-(3-morpholinophenyl)-*N*-phenylacetamide

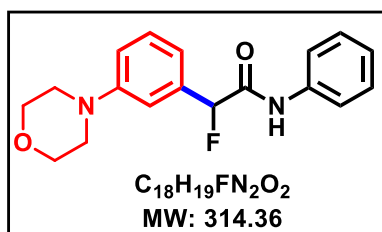

Following the general procedure, the treatment of 2-fluoro-3-oxo-*N*-phenylbutanamide **1a** (39 mg, 0.20 mmol) with 3-morpholino-2-(trimethylsilyl)phenyl trifluoromethanesulfonate **2f** (115 mg, 0.30 mmol) in the presence of TBAF (0.60 mL, 0.60 mmol) in  $\text{CH}_3\text{CN}$  (2 mL) at 25 °C for 4 h followed by column chromatography afforded the product **3aa** as white solid (34 mg, 54%).

$R_f$  (Ethyl acetate/Hexane: 20/80) = 0.20. **Mp** 138-140 °C.  $^{13}\text{C}$  NMR (100 MHz,  $\delta$  ppm/ $\text{CDCl}_3$ ): 166.6 (d,  $J_{\text{C-F}} = 20.6$  Hz, C), 151.7 (C), 136.8 (C), 135.6 (d,  $J_{\text{C-F}} = 19.1$  Hz, C), 129.8 (CH), 129.3 (CH), 129.3 (CH), 125.2 (CH), 120.1 (CH), 120.1 (CH), 117.8 (d,  $J_{\text{C-F}} = 7.0$  Hz, CH), 116.8 (d,  $J_{\text{C-F}} = 2.2$  Hz, C), 113.8 (d,  $J_{\text{C-F}} = 6.9$  Hz, CH), 92.2 (d,  $J_{\text{C-F}} = 188.8$  Hz, CH), 67.0 ( $\text{CH}_2$ ), 67.0 ( $\text{CH}_2$ ), 49.2 ( $\text{CH}_2$ ), 49.2 ( $\text{CH}_2$ ).  $^1\text{H}$  NMR (400 MHz,  $\delta$  ppm/ $\text{CDCl}_3$ ): 8.13 (s, 1H), 7.60 (d,  $J = 7.6$  Hz, 2H), 7.40-7.30 (m, 3H), 7.16 (t,  $J = 7.2$  Hz, 1H), 7.05-7.0 (m, 2H), 6.96-6.91 (m, 1H), 5.85 (d,  $J = 48.4$  Hz, 1H), 3.85 (t,  $J = 4.4$  Hz, 4H), 3.18 (t,  $J = 3.6$  Hz, 4H).  $^{19}\text{F}$  NMR (376 MHz,  $\delta$  ppm/ $\text{CDCl}_3$ ): -176.2 (s). HRMS (ESI)  $m/z$ :  $[\text{M}+\text{H}]^+$  Calcd for  $\text{C}_{18}\text{H}_{20}\text{FN}_2\text{O}_2$  315.1503; found 315.1501.

### Compound 3ab: 2-fluoro-2-(naphthalen-2-yl)-*N*-phenylacetamide

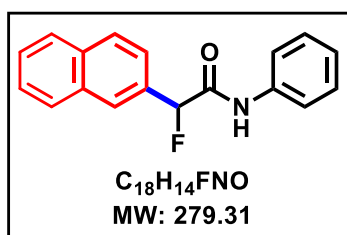

Following the general procedure, the treatment of 2-fluoro-3-oxo-*N*-phenylbutanamide **1a** (39 mg, 0.20 mmol) with 1-(trimethylsilyl)-2-naphthyl trifluoromethanesulfonate **2g** (104 mg, 0.30 mmol) in the presence of TBAF (0.60 mL, 0.60 mmol) in CH<sub>3</sub>CN (2 mL) at 25 °C for 4 h followed by column chromatography afforded the product **3ab** as white solid (37 mg, 67% yield). *R<sub>f</sub>*(Ethyl acetate/Hexane: 20/80) = 0.40.

**Mp** 143-145 °C. <sup>13</sup>C NMR (100 MHz, δ ppm/CDCl<sub>3</sub>): 166.5 (d, *J*<sub>C-F</sub> = 20.7 Hz, C), 136.8 (C), 133.8 (d, *J*<sub>C-F</sub> = 1.8 Hz, C), 133.1 (C), 131.8 (d, *J*<sub>C-F</sub> = 18.9 Hz, C), 129.3 (CH), 129.3 (CH), 128.9 (CH), 128.5 (CH), 127.9 (CH), 127.1 (CH), 126.8 (d, *J*<sub>C-F</sub> = 8.0 Hz, CH), 126.8 (CH), 125.2 (CH), 123.6 (d, *J*<sub>C-F</sub> = 5.4 Hz, CH), 120.2 (CH), 120.2 (CH), 92.2 (d, *J*<sub>C-F</sub> = 188.5 Hz, CH). <sup>1</sup>H NMR (400 MHz, δ ppm/CDCl<sub>3</sub>): 8.26 (s, 1H), 8.0 (s, 1H), 7.91-7.83 (m, 3H), 7.65 (m, 3H), 7.55-7.50 (m, 2H), 7.36 (t, *J* = 8.0 Hz, 2H), 7.17 (t, *J* = 7.6 Hz, 1H), 6.07 (d, *J* = 48.4 Hz, 1H). <sup>19</sup>F NMR (376 MHz, δ ppm/CDCl<sub>3</sub>): -174.9 (s). **HRMS** (ESI) *m/z*: [M+H]<sup>+</sup> Calcd for C<sub>18</sub>H<sub>15</sub>FNO 280.1132; found 280.1142.

### General procedure for the insertion reaction of *N*-methyl- $\alpha$ -fluoro- $\beta$ -ketoamides **5**

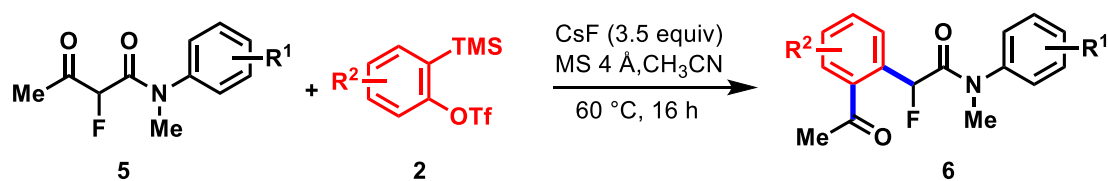

An oven-dried round bottom flask charged with 2-fluoro-*N*-methyl-3-oxo-*N*-phenylbutanamide **5** (0.20 mmol) and MS 4 Å (100 mg) was sealed, evacuated, and backfilled with nitrogen. Subsequently, freshly distilled CH<sub>3</sub>CN (2.0 mL), 2-(trimethylsilyl)phenyl trifluoromethanesulfonate **2** (0.50 mmol), and CsF (0.70 mmol) were added, and the reaction mixture was stirred at 60 °C for 16 h. After the completion of the reaction, as indicated by TLC, the solvent was evaporated, and the crude reaction mixture was extracted using ethyl acetate (3 × 15 mL) and water (15 mL). The organic layer was washed with brine, dried over anhydrous Na<sub>2</sub>SO<sub>4</sub>, and evaporated under reduced pressure. The residue was purified using column chromatography (100-200 mesh silica gel) using ethyl acetate/hexane as the eluent to afford the product **6**.

### Compound 6a: 2-(2-Acetylphenyl)-2-fluoro-N-methyl-N-phenylacetamide

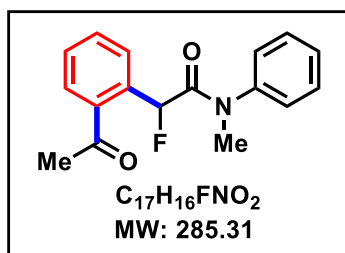

Following the general procedure, the treatment of 2-fluoro-N-methyl-3-oxo-N-phenylbutanamide **5a** (42 mg, 0.20 mmol) with 2-(trimethylsilyl)phenyl trifluoromethanesulfonate **2a** (149 mg, 0.50 mmol) in the presence of CsF (106 mg, 0.70 mmol) and MS 4 Å (100 mg) in CH<sub>3</sub>CN (2 mL) at 60 °C for 16 h followed by column chromatography afforded the product **6a** as white solid (41 mg, 72%). **R<sub>f</sub>** (Ethyl acetate/Hexane: 30/70) = 0.27. **Mp** 117-119 °C. **<sup>13</sup>C NMR** (100 MHz, δ ppm/CDCl<sub>3</sub>): 200.0 (C), 167.0 (d, *J*<sub>C-F</sub> = 21.6 Hz, C), 143.1 (C), 137.3 (d, *J*<sub>C-F</sub> = 19.0 Hz, C), 134.5 (C), 133.0 (CH), 130.3 (CH), 129.5 (CH), 129.5 (CH), 128.3 (CH), 128.3 (CH), 128.2 (CH), 128.1 (CH), 126.8 (d, *J*<sub>C-F</sub> = 18.1 Hz, CH), 87.5 (d, *J*<sub>C-F</sub> = 173.1 Hz, CH), 37.8 (CH<sub>3</sub>), 28.0 (CH<sub>3</sub>). **<sup>1</sup>H NMR** (400 MHz, δ ppm/CDCl<sub>3</sub>): 7.85 (d, *J* = 7.6 Hz, 1H), 7.76 (d, 7.6 Hz, 1H), 7.62-7.57 (m, 3H), 7.48-7.42 (m, 3H), 7.39-7.35 (m, 1H), 6.33 (d, *J* = 47.6 Hz, 1H), 3.34 (s, 3H), 2.55 (s, 3H). **<sup>19</sup>F NMR** (376 MHz, δ ppm/CDCl<sub>3</sub>): -179.9 (s). **HRMS** (ESI) *m/z*: [M+H]<sup>+</sup> Calcd for C<sub>17</sub>H<sub>17</sub>FNO<sub>2</sub> 286.1238; found 286.1239.

### Compound 6b: 2-(2-Acetylphenyl)-2-fluoro-N-(4-methoxyphenyl)-N-methylacetamide

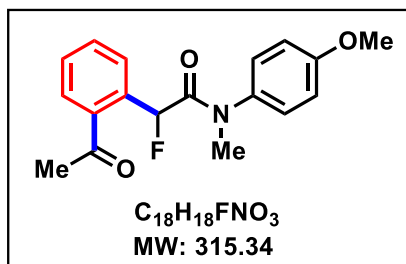

Following the general procedure, the treatment of 2-fluoro-N-(4-methoxyphenyl)-N-methyl-3-oxobutanamide **5b** (48 mg, 0.20 mmol) with 2-(trimethylsilyl)phenyl trifluoromethanesulfonate **2a** (149 mg, 0.50 mmol) in the presence of CsF (106 mg, 0.70 mmol) and MS 4 Å (100 mg) in CH<sub>3</sub>CN (2 mL) at 60 °C for 16 h followed by column chromatography afforded the product **6b** as white solid (38 mg, 60%). **R<sub>f</sub>**(Ethyl acetate/Hexane: 30/70) = 0.22. **<sup>13</sup>C NMR** (100 MHz, δ ppm/CDCl<sub>3</sub>): 200.0 (C), 167.3 (d, *J*<sub>C-F</sub> = 21.4 Hz, C), 159.2 (C), 137.4 (d, *J*<sub>C-F</sub> = 19.0 Hz, C), 135.8 (C), 134.6 (d, *J*<sub>C-F</sub> = 2.9 Hz, C), 132.9 (d, *J*<sub>C-F</sub> = 2.1 Hz, CH), 130.2 (CH), 129.4 (CH), 129.4 (CH), 128.0 (CH), 126.8 (d, *J*<sub>C-F</sub> = 18.0 Hz, CH), 114.6 (CH), 114.6 (CH), 87.6 (d, *J*<sub>C-F</sub> = 172.9 Hz, CH), 55.5 (CH<sub>3</sub>), 38.0 (CH<sub>3</sub>), 28.1 (CH<sub>3</sub>). **<sup>1</sup>H NMR** (400 MHz, δ ppm/CDCl<sub>3</sub>): 7.83 (d, *J* = 7.6 Hz, 1H), 7.75 (d, *J* = 8.0 Hz, 1H), 7.60 (t, *J* = 7.6 Hz, 1H), 7.50 (s, 1H), 7.47 (s, 1H), 7.42 (t, *J* = 7.6 Hz, 1H), 6.96 (s, 1H), 6.94 (s, 1H), 6.32 (d, *J* = 47.6 Hz, 1H), 3.82 (s, 3H), 3.29 (d, *J* = 2.0 Hz, 3H), 2.53 (s, 3H). **<sup>19</sup>F NMR** (376 MHz, δ ppm/CDCl<sub>3</sub>): -180.0 (s). **HRMS** (ESI) *m/z*: [M+H]<sup>+</sup> Calcd for C<sub>18</sub>H<sub>19</sub>FNO<sub>3</sub> 316.1343; found 316.1346.

### Compound 6c: 2-(2-Acetylphenyl)-*N*-(4-ethylphenyl)-2-fluoro-*N*-methylacetamide

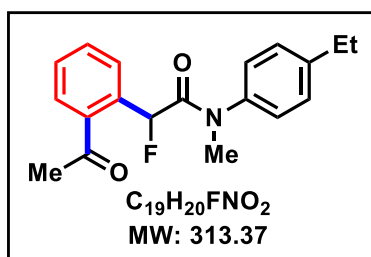

Following the general procedure, the treatment of *N*-(4-ethylphenyl)-2-fluoro-*N*-methyl-3-oxobutanamide **5c** (47 mg, 0.20 mmol) with 2-(trimethylsilyl)phenyl trifluoromethanesulfonate **2a** (149 mg, 0.50 mmol) in the presence of CsF (106 mg, 0.70 mmol) and MS 4 Å (100 mg) in CH<sub>3</sub>CN (2 mL) at 60 °C for 16 h followed by column chromatography afforded the product **6c** as yellow liquid (40 mg, 63%).  $R_f$  (Ethyl acetate/Hexane: 30/70) = 0.27.  $^{13}C$  NMR (100 MHz,  $\delta$  ppm/CDCl<sub>3</sub>): 200.0 (C), 167.1 (d,  $J_{C-F}$  = 21.5 Hz, C), 144.2 (C), 140.6 (C), 137.4 (d,  $J_{C-F}$  = 18.9 Hz, C), 134.6 (d,  $J_{C-F}$  = 2.9 Hz, C), 132.9 (d,  $J_{C-F}$  = 2.1 Hz, CH), 130.2 (CH), 128.9 (CH), 128.9 (CH), 128.1 (CH), 128.0 (CH), 128.0 (CH), 126.8 (d,  $J_{C-F}$  = 18.2 Hz, CH), 87.5 (d,  $J_{C-F}$  = 173.0 Hz, CH), 37.8 (CH<sub>3</sub>), 28.5 (CH<sub>3</sub>), 28.1 (CH<sub>2</sub>), 15.4 (CH<sub>3</sub>).  $^1H$  NMR (400 MHz,  $\delta$  ppm/CDCl<sub>3</sub>): 7.84 (d,  $J$  = 8.0 Hz, 1H), 7.76 (d,  $J$  = 7.6 Hz, 1H), 7.60 (t,  $J$  = 8.0 Hz, 1H), 7.48 (d,  $J$  = 8.0 Hz, 2H), 7.43 (t,  $J$  = 7.2 Hz, 1H), 7.28 (d,  $J$  = 8.0 Hz, 2H), 6.34 (d,  $J$  = 47.6 Hz, 1H), 3.32 (d,  $J$  = 1.6 Hz, 3H), 2.7 (q,  $J$  = 7.6 Hz, 2H), 2.54 (s, 3H), 1.27 (t,  $J$  = 7.6 Hz, 3H).  $^{19}F$  NMR (376 MHz,  $\delta$  ppm/CDCl<sub>3</sub>): -179.8 (s). HRMS (ESI)  $m/z$ : [M+H]<sup>+</sup> Calcd for C<sub>19</sub>H<sub>21</sub>FNO<sub>2</sub> 314.1551; found 314.1551.

### Compound 6d: 2-(2-Acetylphenyl)-2-fluoro-*N*-methyl-*N*-(*p*-tolyl)acetamide

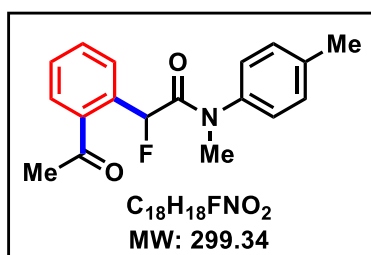

Following the general procedure, the treatment of 2-fluoro-*N*-methyl-3-oxo-*N*-(*p*-tolyl)butanamide **5d** (45 mg, 0.20 mmol) with 2-(trimethylsilyl)phenyl trifluoromethanesulfonate **2a** (149 mg, 0.50 mmol) in the presence of CsF (106 mg, 0.70 mmol) and MS 4 Å (100 mg) in CH<sub>3</sub>CN (2 mL) at 60 °C for 16 h followed by column chromatography afforded the product **6d** as white solid (41 mg, 69%).  $R_f$  (Ethyl acetate/Hexane: 30/70) = 0.27.  $Mp$  111-113 °C.  $^{13}C$  NMR (100 MHz,  $\delta$  ppm/CDCl<sub>3</sub>): 200.0 (C), 167.1 (d,  $J_{C-F}$  = 21.5 Hz, C), 140.5 (C), 138.0 (C), 137.4 (d,  $J_{C-F}$  = 19.1 Hz, C), 134.6 (d,  $J_{C-F}$  = 2.9 Hz, C), 133.0 (d,  $J_{C-F}$  = 2.1 Hz, CH), 130.2 (CH), 130.1 (CH), 130.1 (CH), 128.1 (CH), 128.0 (CH), 128.0 (CH), 126.8 (d,  $J_{C-F}$  = 18.1 Hz, CH), 87.8 (d,  $J_{C-F}$  = 173.0 Hz, CH), 38.0 (CH<sub>3</sub>), 28.1 (CH<sub>3</sub>), 21.2 (CH<sub>3</sub>).  $^1H$  NMR (400 MHz,  $\delta$  ppm/CDCl<sub>3</sub>): 7.84 (d,  $J$  = 7.6 Hz, 1H), 7.76 (d,  $J$  = 7.6 Hz, 1H), 7.60 (t,  $J$  = 7.6 Hz, 1H), 7.47-7.41 (m, 3H), 7.25 (d,  $J$  = 7.6 Hz, 2H), 6.34 (d,  $J$  = 47.2 Hz, 1H), 3.31 (s, 3H), 2.53 (s, 3H), 2.39 (s, 3H).  $^{19}F$  NMR (376 MHz,  $\delta$  ppm/CDCl<sub>3</sub>): -180.0 (s). HRMS (ESI)  $m/z$ : [M+H]<sup>+</sup> Calcd for C<sub>18</sub>H<sub>19</sub>FNO<sub>2</sub> 300.1394; found 300.1395.

### Compound 6e: 2-(2-Acetylphenyl)-*N*-(4-bromophenyl)-2-fluoro-*N*-methylacetamide

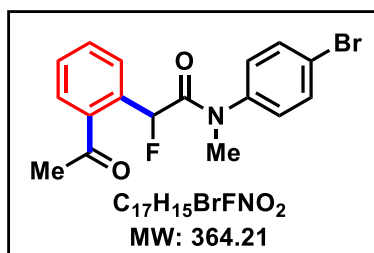

Following the general procedure, the treatment of *N*-(4-bromophenyl)-2-fluoro-*N*-methyl-3-oxobutanamide **5e** (58 mg, 0.20 mmol) with 2-(trimethylsilyl)phenyl trifluoromethanesulfonate **2a** (149 mg, 0.50 mmol) in the presence of CsF (106 mg, 0.70 mmol) and MS 4 Å (100 mg) in CH<sub>3</sub>CN (2 mL) at 60 °C for 16 h followed by column chromatography afforded the product **6e** as white solid (44 mg, 61%). **R<sub>f</sub>** (Ethyl acetate/Hexane: 30/70) = 0.27. **Mp** 120-122 °C. **<sup>13</sup>C NMR** (100 MHz, δ ppm/CDCl<sub>3</sub>): 200.1 (C), 166.9 (d, *J*<sub>C-F</sub> = 21.1 Hz, C), 142.2 (C), 137.3 (d, *J*<sub>C-F</sub> = 18.7 Hz, C), 134.3 (d, *J*<sub>C-F</sub> = 2.9 Hz, C), 133.1 (d, *J*<sub>C-F</sub> = 2.2 Hz, CH), 132.8 (CH), 132.8 (CH), 130.5 (CH), 130.1 (CH), 130.1 (CH), 128.3 (CH), 126.7 (d, *J*<sub>C-F</sub> = 18.8 Hz, CH), 122.1 (C), 88.7 (d, *J*<sub>C-F</sub> = 172.9 Hz, CH), 37.8 (CH<sub>3</sub>), 28.0 (CH<sub>3</sub>). **<sup>1</sup>H NMR** (400 MHz, δ ppm/CDCl<sub>3</sub>): 7.88 (d, *J* = 7.6 Hz, 1H), 7.75 (d, *J* = 7.6 Hz, 1H), 7.64-7.58 (m, 3H), 7.50-7.43 (m, 3H), 6.28 (d, *J* = 47.2 Hz, 1H), 3.30 (s, 3H), 2.58 (s, 3H). **<sup>19</sup>F NMR** (376 MHz, δ ppm/CDCl<sub>3</sub>): -180.3 (s). **HRMS** (ESI) *m/z*: [M+H]<sup>+</sup> Calcd for C<sub>17</sub>H<sub>16</sub>BrFNO<sub>2</sub> 364.0343; found 364.0347.

### Compound 6f: 2-(2-Acetylphenyl)-*N*-(4-cyanophenyl)-2-fluoro-*N*-methylacetamide

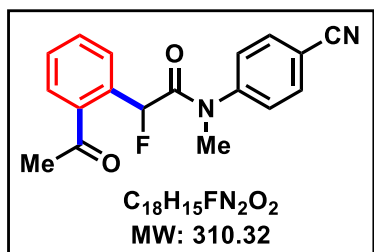

Following the general procedure, the treatment of *N*-(4-cyanophenyl)-2-fluoro-*N*-methyl-3-oxobutanamide **5f** (47 mg, 0.20 mmol) with 2-(trimethylsilyl)phenyl trifluoromethanesulfonate **2a** (149 mg, 0.50 mmol) in the presence of CsF (106 mg, 0.70 mmol) and MS 4 Å (100 mg) in CH<sub>3</sub>CN (2 mL) at 60 °C for 16 h followed by column chromatography afforded the product **6f** as white solid (37 mg, 59%). **R<sub>f</sub>** (Ethyl acetate/Hexane: 30/70) = 0.20. **Mp** 145-147 °C. **<sup>13</sup>C NMR** (100 MHz, δ ppm/CDCl<sub>3</sub>): 200.3 (C), 166.6 (d, *J*<sub>C-F</sub> = 23.1 Hz, C), 147.4 (C), 137.1 (d, *J*<sub>C-F</sub> = 18.8 Hz, C), 134.0 (d, *J*<sub>C-F</sub> = 2.7 Hz, C), 133.5 (CH), 133.5 (CH), 133.3 (d, *J*<sub>C-F</sub> = 2.4 Hz, CH), 130.7 (CH), 129.1 (CH), 128.7 (CH), 128.4 (CH), 126.5 (d, *J*<sub>C-F</sub> = 19.1 Hz, CH), 118.3 (C), 111.8 (C), 87.8 (d, *J*<sub>C-F</sub> = 174.4 Hz, CH), 38.7 (CH<sub>3</sub>), 28.0 (CH<sub>3</sub>). **<sup>1</sup>H NMR** (400 MHz, δ ppm/CDCl<sub>3</sub>): 7.91 (d, *J* = 7.6 Hz, 1H), 7.80-7.72 (m, 5H), 7.65 (t, *J* = 7.6 Hz, 1H), 7.48 (t, *J* = 7.6 Hz, 1H), 6.28 (d, *J* = 41.6 Hz, 1H), 3.39 (s, 3H), 2.57 (s, 3H). **<sup>19</sup>F NMR** (376 MHz, δ ppm/CDCl<sub>3</sub>): -180.3 (s). **HRMS** (ESI) *m/z*: [M+H]<sup>+</sup> Calcd for C<sub>18</sub>H<sub>16</sub>FN<sub>2</sub>O<sub>2</sub> 311.1190; found 311.1193.

### Compound 6g: 2-(2-Acetylphenyl)-*N*-(3,4-dichlorophenyl)-2-fluoro-*N*-methylacetamide

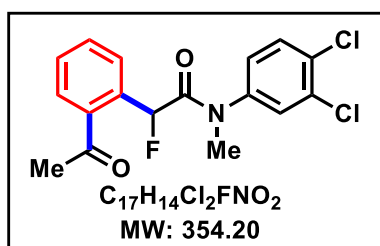

Following the general procedure, the treatment of *N*-(3,4-dichlorophenyl)-2-fluoro-*N*-methyl-3-oxobutanamide **5g** (56 mg, 0.20 mmol) with 2-(trimethylsilyl)phenyl trifluoromethanesulfonate **2a** (149 mg, 0.50 mmol) in the presence of CsF (106 mg, 0.70 mmol) and MS 4 Å (100 mg) in CH<sub>3</sub>CN (2 mL) at 60 °C for 16 h followed by column chromatography af-

forded the product **6g** as white solid (45 mg, 64%).  $R_f$  (Ethyl acetate/Hexane: 30/70) = 0.32. **Mp** 126-128 °C.  $^{13}\text{C NMR}$  (100 MHz,  $\delta$  ppm/CDCl<sub>3</sub>): 200.0 (C), 166.7 (d,  $J_{\text{C-F}}$  = 20.3 Hz, C), 142.6 (C), 137.0 (d,  $J_{\text{C-F}}$  = 19.0 Hz, C), 134.2 (d,  $J_{\text{C-F}}$  = 2.6 Hz, C), 133.3 (C), 133.2 (d,  $J_{\text{C-F}}$  = 2.2 Hz, CH), 132.5 (C), 131.2 (CH), 130.5 (CH), 130.5 (CH), 128.4 (CH), 127.9 (CH), 126.6 (d,  $J_{\text{C-F}}$  = 18.8 Hz, CH), 87.7 (d,  $J_{\text{C-F}}$  = 173.0 Hz, CH), 37.8 (CH<sub>3</sub>), 27.9 (CH<sub>3</sub>).  $^1\text{H NMR}$  (400 MHz,  $\delta$  ppm/CDCl<sub>3</sub>): 7.90 (d,  $J$  = 7.2 Hz, 1H), 7.77-7.71 (m, 2H), 7.63 (t,  $J$  = 7.6 Hz, 1H), 7.55-7.44 (m, 3H), 6.29 (d,  $J$  = 47.6 Hz, 1H), 3.30 (s, 3H), 2.56 (s, 3H).  $^{19}\text{F NMR}$  (376 MHz,  $\delta$  ppm/CDCl<sub>3</sub>): -180.6 (s). **HRMS** (ESI)  $m/z$ : [M+H]<sup>+</sup> Calcd for C<sub>17</sub>H<sub>15</sub>Cl<sub>2</sub>FNO<sub>2</sub> 354.0458; found 354.0461.

### Compound 6h: 2-(2-Acetylphenyl)-*N*-(benzo[*d*][1,3]dioxol-5-yl)-2-fluoro-*N*-methylacetamide

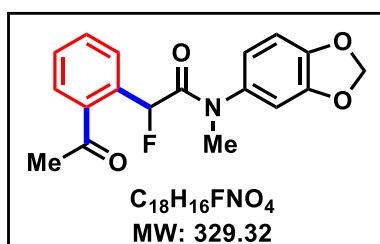

Following the general procedure, the treatment of *N*-(benzo[*d*][1,3]dioxol-5-yl)-2-fluoro-*N*-methyl-3-oxobutanamide **5h** (51 mg, 0.20 mmol) with 2-(trimethylsilyl)phenyl trifluoromethanesulfonate **2a** (149 mg, 0.50 mmol) in the presence of CsF (106 mg, 0.70 mmol) and MS 4 Å (100 mg) in CH<sub>3</sub>CN (2 mL) at 60 °C for 16 h followed by column chroma-

tography afforded the product **6h** as white solid (43 mg, 65%).  $R_f$  (Ethyl acetate/Hexane: 30/70) = 0.22. **Mp** 110-112 °C.  $^{13}\text{C NMR}$  (100 MHz,  $\delta$  ppm/CDCl<sub>3</sub>): 201.0 (C), 168.3 (d,  $J_{\text{C-F}}$  = 21.3 Hz, C), 149.1 (C), 148.4 (C), 138.4 (d,  $J_{\text{C-F}}$  = 19.0 Hz, C), 137.9 (C), 135.5 (d,  $J_{\text{C-F}}$  = 2.8 Hz, C), 134.0 (CH), 131.3 (CH), 129.1 (CH), 127.8 (d,  $J_{\text{C-F}}$  = 16.5 Hz, CH), 123.0 (CH), 110.3 (CH), 109.4 (CH), 102.8 (CH<sub>2</sub>), 88.6 (d,  $J_{\text{C-F}}$  = 173.0 Hz, CH), 39.0 (CH<sub>3</sub>), 29.0 (CH<sub>3</sub>).  $^1\text{H NMR}$  (400 MHz,  $\delta$  ppm/CDCl<sub>3</sub>): 7.86 (d,  $J$  = 7.6 Hz, 1H), 7.76 (d,  $J$  = 7.6 Hz, 1H), 7.61 (t,  $J$  = 7.6 Hz, 1H), 7.44 (t,  $J$  = 7.6 Hz, 1H), 7.07 (m, 2H), 6.84 (d,  $J$  = 8.4 Hz, 1H), 6.38 (d,  $J$  = 47.2 Hz, 1H), 6.01 (s, 2H), 3.28 (s, 3H), 2.55 (s, 3H).  $^{19}\text{F NMR}$  (376 MHz,  $\delta$  ppm/CDCl<sub>3</sub>): -180.2 (s). **HRMS** (ESI)  $m/z$ : [M+H]<sup>+</sup> Calcd for C<sub>18</sub>H<sub>17</sub>FNO<sub>4</sub> 330.1136; found 330.1139.



### Compound 6i: 2-(3-Acetylnaphthalen-2-yl)-2-fluoro-N-methyl-N-phenylacetamide

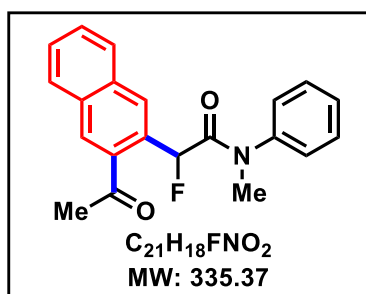

Following the general procedure, the treatment of 2-fluoro-N-methyl-3-oxo-N-phenylbutanamide **5a** (42 mg, 0.20 mmol) with 3-(trimethylsilyl)naphthalen-2-yl trifluoromethanesulfonate **2h** (174 mg, 0.50 mmol) in the presence of CsF (106 mg, 0.70 mmol) and MS 4 Å (100 mg) in CH<sub>3</sub>CN (2 mL) at 60 °C for 16 h followed by column chromatography afforded the product **6i** as brown solid (39 mg, 58%).  $R_f$  (Ethyl acetate/Hexane:

30/70) = 0.32. **Mp** 149-152 °C.  $^{13}C$  NMR (100 MHz,  $\delta$  ppm/CDCl<sub>3</sub>): 199.9 (C), 167.4 (d,  $J_{C-F}$  = 21.4 Hz, C), 143.2 (C), 134.9 (d,  $J_{C-F}$  = 2.1 Hz, C), 132.9 (d,  $J_{C-F}$  = 18.3 Hz, C), 132.7 (d,  $J_{C-F}$  = 2.7 Hz, C), 132.5 (CH), 131.9 (C), 129.5 (CH), 129.5 (CH), 129.0 (CH), 128.9 (CH), 128.4 (CH), 128.3 (CH), 128.3 (CH), 128.1 (CH), 127.3 (CH), 126.4 (d,  $J_{C-F}$  = 18.5 Hz, CH), 87.7 (d,  $J_{C-F}$  = 173.7 Hz, CH), 37.9 (CH<sub>3</sub>), 27.9 (CH<sub>3</sub>).  $^1H$  NMR (400 MHz,  $\delta$  ppm/CDCl<sub>3</sub>): 8.38 (s, 1H), 8.16 (s, 1H), 7.91 (d,  $J$  = 8.4 Hz, 1H), 7.88 (d,  $J$  = 8.0 Hz, 1H), 7.64-7.58 (m, 3H), 7.55 (t,  $J$  = 8.4 Hz, 1H), 7.48 (t,  $J$  = 7.2 Hz, 2H), 7.39 (t,  $J$  = 7.1 Hz, 1H), 6.49 (d,  $J$  = 47.2 Hz, 1H), 3.36 (s, 3H), 2.67 (s, 3H).  $^{19}F$  NMR (376 MHz,  $\delta$  ppm/CDCl<sub>3</sub>): -179.3 (s). **HRMS** (ESI)  $m/z$ : [M+H]<sup>+</sup> Calcd for C<sub>21</sub>H<sub>19</sub>FNO<sub>2</sub> 336.1394; found 336.1389.

### Compound 6j and 6j': 2-(2-Acetyl-4-methoxyphenyl)-2-fluoro-N-methyl-N-phenylacetamide and 2-(2-acetyl-5-methoxyphenyl)-2-fluoro-N-methyl-N-phenylacetamide

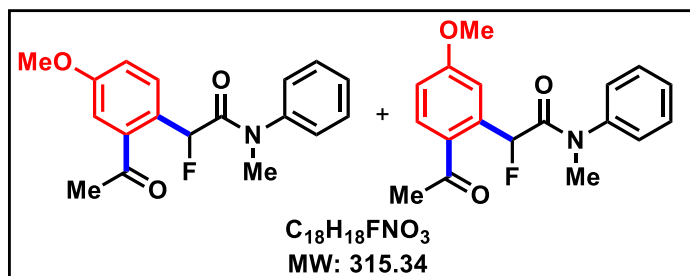

Following the general procedure, the treatment of 2-fluoro-N-methyl-3-oxo-N-phenylbutanamide **5a** (42 mg, 0.20 mmol) with 4-methoxy-2-(trimethylsilyl)phenyl trifluoromethanesulfonate **2b** (164 mg, 0.50 mmol) in the presence of CsF (106 mg, 0.70 mmol)

and MS 4 Å (100 mg) in CH<sub>3</sub>CN (2 mL) at 60 °C for 16 h followed by column chromatography afforded the product **6j** and **6j'** as a separable 1:1 mixture of regioisomers as white solid (39 mg, 61%).  $R_f$  (Ethyl acetate/Hexane: 30/70) = 0.25. Compound **6j**: **Mp** 102-104 °C.  $^{13}C$  NMR (100 MHz,  $\delta$  ppm/CDCl<sub>3</sub>): 199.8 (C), 167.4 (d,  $J_{C-F}$  = 17.4 Hz, C), 159.3 (C), 143.0 (C), 136.2 (C), 129.5 (CH), 129.5 (CH), 128.7 (CH), 128.6 (C), 128.2 (CH), 128.2 (CH), 128.1 (CH), 117.0 (CH), 116.8 (CH), 87.0 (d,  $J_{C-F}$  = 137.8 Hz, CH), 55.7 (CH<sub>3</sub>), 37.9 (CH<sub>3</sub>), 28.2 (CH<sub>3</sub>).  $^1H$  NMR (400 MHz,  $\delta$  ppm/CDCl<sub>3</sub>): 7.67 (d, 8.8 Hz, 1H), 7.49-7.47 (m, 2H), 7.43 (t, 7.6 Hz, 2H), 7.37-7.33 (m, 1H), 7.30 (s, 1H), 7.12-7.10 (m, 1H), 6.26 (d,  $J$  = 48.4 Hz, 1H), 3.85 (s, 3H), 3.32 (s, 3H), 2.48 (s, 3H).  $^{19}F$  NMR (376 MHz,  $\delta$  ppm/CDCl<sub>3</sub>): -177.7 (s). **HRMS** (ESI)  $m/z$ : [M+H]<sup>+</sup> Calcd for C<sub>18</sub>H<sub>19</sub>FNO<sub>3</sub> 316.1343; found 316.1338. Compound **6j'**:  $R_f$  (Ethyl acetate/Hexane: 30/70) = 0.22. **Mp** 110-112 °C.  $^{13}C$  NMR (100 MHz,  $\delta$  ppm/CDCl<sub>3</sub>): 198.2 (C), 166.8 (d,  $J_{C-F}$  = 21.3 Hz, C), 163.3 (d,  $J_{C-F}$  = 2.6 Hz, C), 143.3 (C), 140.6 (d,  $J_{C-F}$  = 18.1 Hz, C), 133.1 (CH), 129.5 (CH), 129.5 (CH), 128.3 (CH), 128.3 (CH), 128.1 (CH), 127.3 (d,  $J_{C-F}$  = 2.3 Hz, C), 113.1 (CH), 112.1 (d,  $J_{C-F}$  = 20.8 Hz, CH),



87.9 (d,  $J_{C-F} = 174.0$  Hz, CH), 55.6 (CH<sub>3</sub>), 37.8 (CH<sub>3</sub>), 27.7 (CH<sub>3</sub>). **<sup>1</sup>H NMR** (400 MHz,  $\delta$  ppm/CDCl<sub>3</sub>): 7.83 (d, 8.8 Hz, 1H), 7.64-7.62 (m, 2H), 7.48-7.44 (m, 2H), 7.39-7.35 (m, 1H), 7.27 (s, 1H), 6.90-6.86 (m, 1H), 6.33 (d,  $J = 47.6$  Hz, 1H), 3.90 (s, 3H), 3.33 (s, 3H), 2.50 (s, 3H). **<sup>19</sup>F NMR** (376 MHz,  $\delta$  ppm/CDCl<sub>3</sub>): -179.7 (s). **HRMS** (ESI)  $m/z$ : [M+H]<sup>+</sup> Calcd for C<sub>18</sub>H<sub>19</sub>FNO<sub>3</sub> 316.1343; found 316.1338.

**Compound 6k and 6k': 2-(2-acetyl-4-methylphenyl)-2-fluoro-N-methyl-N-phenylacetamide and 2-(2-acetyl-5-methylphenyl)-2-fluoro-N-methyl-N-phenylacetamide**

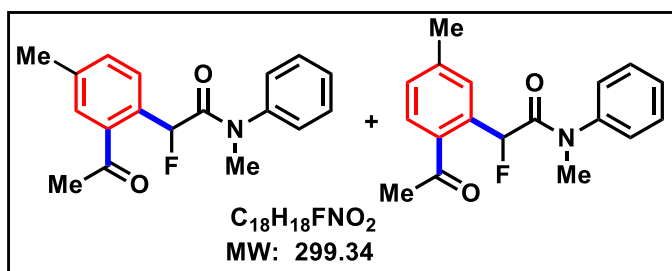

Following the general procedure, the treatment of 2-fluoro-*N*-methyl-3-oxo-*N*-phenylbutanamide **5a** (42 mg, 0.20 mmol) with 4-methyl-2-(trimethylsilyl)phenyl trifluoromethanesulfonate **2c** (156 mg, 0.50 mmol) in the presence of CsF (106 mg, 0.70 mmol) in

CH<sub>3</sub>CN (2 mL) at 60 °C for 16 h followed by column chromatography afforded the product **6k** and **6k'** as an inseparable mixture of regioisomers in 1:1 ratio as white solid (39 mg, 65%).  $R_f$  (Ethyl acetate/Hexane: 30/70) = 0.34.  $M_p$  117-119 °C. **<sup>13</sup>C NMR** (100 MHz,  $\delta$  ppm/CDCl<sub>3</sub>, representative peaks of **6k**): 200.1 (C), 167.2 (d,  $J_{C-F} = 21.8$  Hz, C), 143.9 (C), 143.1 (C), 137.4 (d,  $J_{C-F} = 18.5$  Hz, C), 134.6 (d,  $J_{C-F} = 2.9$  Hz, C), 133.6 (CH), 130.7 (CH), 129.5 (CH), 129.5 (CH), 128.3 (CH), 128.3 (CH), 128.1 (CH), 127.5 (d,  $J_{C-F} = 18.0$  Hz, CH), 87.7 (d,  $J_{C-F} = 172.8$  Hz, CH), 37.8 (CH<sub>3</sub>), 28.1 (CH<sub>3</sub>), 21.9 (CH<sub>3</sub>). **<sup>1</sup>H NMR** (400 MHz,  $\delta$  ppm/CDCl<sub>3</sub>): 7.75 (d,  $J = 8.0$  Hz, 1H), 7.65-7.60 (m, 3H), 7.59-7.53 (m, 4H), 6.32 (d, 47.6 Hz, 1H), 3.33 (s, 3H), 2.52 (s, 3H), 2.42 (s, 3H). **<sup>19</sup>F NMR** (376 MHz,  $\delta$  ppm/CDCl<sub>3</sub>): -179.6 (s). **<sup>13</sup>C NMR** (100 MHz,  $\delta$  ppm/CDCl<sub>3</sub>, representative peaks of **6k'**): 199.5 (C), 167.1 (d,  $J_{C-F} = 21.5$  Hz, C), 143.2 (C), 138.0 (C), 134.7 (d,  $J_{C-F} = 19.4$  Hz, C), 131.9 (d,  $J_{C-F} = 2.5$  Hz, C), 131.0 (CH), 128.7 (CH), 129.4 (CH), 129.4 (CH), 128.3 (CH), 128.3 (CH), 128.1 (CH), 126.9 (d,  $J_{C-F} = 17.2$  Hz, CH), 87.5 (d,  $J_{C-F} = 172.4$  Hz, CH), 37.8 (CH<sub>3</sub>), 27.9 (CH<sub>3</sub>), 21.2 (CH<sub>3</sub>). **<sup>1</sup>H NMR** (400 MHz,  $\delta$  ppm/CDCl<sub>3</sub>): 7.48-7.42 (m, 4H), 7.41-7.34 (m, 3H), 7.22 (d,  $J = 8.0$  Hz, 1H), 6.29 (d, 47.2 Hz, 1H), 3.33 (s, 3H), 2.51 (s, 3H), 2.41 (s, 3H). **<sup>19</sup>F NMR** (376 MHz,  $\delta$  ppm/CDCl<sub>3</sub>): -179.9 (s). **HRMS** (ESI)  $m/z$ : [M+H]<sup>+</sup> Calcd for C<sub>18</sub>H<sub>19</sub>FNO<sub>2</sub> 300.1394; found 300.1399.

**Compound 6l: 2-(2-acetyl-3-methoxyphenyl)-2-fluoro-N-methyl-N-phenylacetamide**

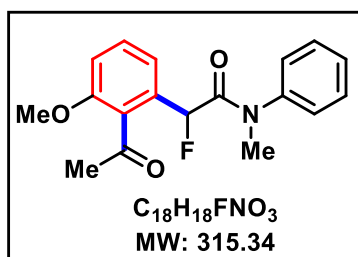

Following the general procedure, the treatment of 2-fluoro-*N*-methyl-3-oxo-*N*-phenylbutanamide **5a** (42 mg, 0.20 mmol) with 3-methoxy-2-(trimethylsilyl)phenyl trifluoromethanesulfonate **2i** (164 mg, 0.50 mmol) in the presence of CsF (106 mg, 0.70 mmol) in CH<sub>3</sub>CN (2 mL) at 60 °C for 16 h followed by column chromatography afforded the product **6l** as colourless liquid (35

mg, 56%).  $R_f$  (Ethyl acetate/Hexane: 40/60) = 0.37. **<sup>13</sup>C NMR** (100 MHz,  $\delta$  ppm/CDCl<sub>3</sub>): 203.6 (C), 167.1 (d,  $J_{C-F} = 22.3$  Hz, C), 157.3 (C), 142.5 (C), 134.9 (d,  $J_{C-F} = 20.0$  Hz, C), 131.4 (CH), 129.8

(CH), 129.8 (CH), 129.0 (C), 128.4 (CH), 128.0 (CH), 128.0 (CH), 119.5 (d,  $J_{C-F}$  = 11.9 Hz, CH), 111.9 (CH), 86.2 (d,  $J_{C-F}$  = 174.7 Hz, CH), 55.9 (CH<sub>3</sub>), 38.1 (CH<sub>3</sub>), 32.3 (CH<sub>3</sub>). **<sup>1</sup>H NMR** (400 MHz,  $\delta$  ppm/CDCl<sub>3</sub>): 7.42-7.33 (m, 4H), 7.29-7.27 (m, 2H), 7.18 (d,  $J$  = 8.0 Hz, 1H), 6.95 (d,  $J$  = 8.0 Hz, 1H), 5.91 (d,  $J$  = 47.2 Hz, 1H), 3.80 (s, 3H), 3.32 (s, 3H), 2.38 (s, 3H). **<sup>19</sup>F NMR** (376 MHz,  $\delta$  ppm/CDCl<sub>3</sub>): -175.2 (s). **HRMS** (ESI)  $m/z$ : [M+H]<sup>+</sup> Calcd for C<sub>18</sub>H<sub>19</sub>FNO<sub>3</sub> 316.1343; found 316.1346.

### Compound 6m: 2-(2-acetyl-3-morpholinophenyl)-2-fluoro-*N*-methyl-*N*-phenylacetamide

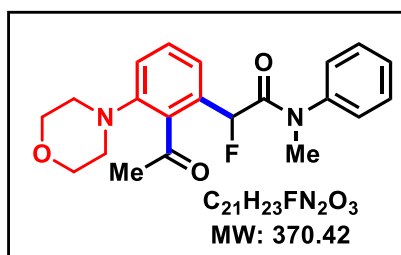

Following the general procedure, the treatment of 2-fluoro-*N*-methyl-3-oxo-*N*-phenylbutanamide **5a** (42 mg, 0.20 mmol) with 3-morpholino-2-(trimethylsilyl)phenyl trifluoromethanesulfonate **2f** (192 mg, 0.50 mmol) in the presence of CsF (106 mg, 0.70 mmol) in CH<sub>3</sub>CN (2 mL) at 60 °C for 16 h followed by column chromatography afforded the product

**6m** as white solid (39 mg, 52%).  $R_f$  (Ethyl acetate/Hexane: 30/70) = 0.20. **Mp** 178-180 °C. **<sup>13</sup>C NMR** (100 MHz,  $\delta$  ppm/CDCl<sub>3</sub>): 206.3 (C), 167.1 (d,  $J_{C-F}$  = 22.8 Hz, C), 150.1 (C), 142.1 (C), 137.0 (C), 132.8 (d,  $J_{C-F}$  = 21.2 Hz, C), 130.5 (CH), 129.8 (CH), 129.8 (CH), 128.5 (CH), 127.8 (CH), 123.1 (d,  $J_{C-F}$  = 9.0 Hz, CH), 123.1 (d,  $J_{C-F}$  = 9.0 Hz, CH), 120.7 (CH), 85.6 (d,  $J_{C-F}$  = 175.4 Hz, CH), 67.2 (CH<sub>2</sub>), 67.2 (CH<sub>2</sub>), 55.5 (CH<sub>2</sub>), 55.5 (CH<sub>2</sub>), 38.1 (CH<sub>3</sub>), 31.7 (CH<sub>3</sub>). **<sup>1</sup>H NMR** (400 MHz,  $\delta$  ppm/CDCl<sub>3</sub>): 7.42-7.29 (m, 5H), 7.17-7.10 (m, 3H), 5.82 (d,  $J$  = 47.6 Hz, 1H), 3.74 (t,  $J$  = 4.0 Hz, 4H), 3.31 (s, 3H), 2.87 (t,  $J$  = 4.0 Hz, 4H), 2.40 (s, 3H). **<sup>19</sup>F NMR** (376 MHz,  $\delta$  ppm/CDCl<sub>3</sub>): -173.8 (s). **HRMS** (ESI)  $m/z$ : [M+H]<sup>+</sup> Calcd for C<sub>21</sub>H<sub>24</sub>FN<sub>2</sub>O<sub>3</sub> 371.1765; found 371.1783.

### Procedure for the synthesis of 2-fluoro-3-oxo-*N*,2-diphenylbutanamide **7**

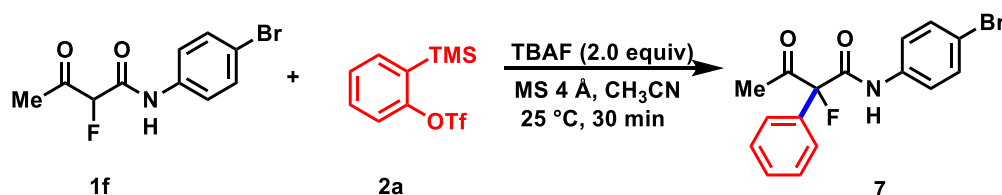

An oven-dried round bottom flask charged with *N*-(4-bromophenyl)-2-fluoro-3-oxobutanamide **1f** (0.20 mmol) and MS 4 Å (100 mg) was sealed, evacuated, and backfilled with nitrogen. Subsequently, Freshly distilled CH<sub>3</sub>CN (2.0 mL), 2-(trimethylsilyl)phenyl trifluoromethanesulfonate **2a** (0.30 mmol), and TBAF (0.40 mmol) were added, and the reaction mixture was stirred at 25 °C for 30 min. After the completion of the reaction, as indicated by TLC, the solvent was evaporated off, and the crude reaction mixture was purified using flash column chromatography (100-200 mesh silica gel) using ethyl acetate/hexane as the eluent to afford the product **7** as white solid.  $R_f$  (Ethyl acetate/Hexane: 20/80) = 0.37. **Mp** 126-128 °C. **<sup>13</sup>C NMR** (100 MHz,  $\delta$  ppm/CDCl<sub>3</sub>): 200.4 (d,  $J_{C-F}$  = 21.4 Hz, C), 163.0 (d,  $J_{C-F}$  = 17.4 Hz, C), 135.7 (C), 133.2 (d,  $J_{C-F}$  = 17.2 Hz, C), 132.3 (CH), 132.3 (CH), 130.0 (d,  $J_{C-F}$  = 1.4 Hz, CH), 129.1 (CH), 129.1 (CH), 125.5 (d,  $J_{C-F}$  = 6.5 Hz, CH), 125.5 (d,  $J_{C-F}$  = 6.5 Hz, CH), 121.8 (CH), 121.8 (CH), 118.2

(C), 99.8 (d,  $J_{C-F} = 158.8$  Hz, C), 26.4 (CH<sub>3</sub>). **<sup>1</sup>H NMR** (400 MHz,  $\delta$  ppm/CDCl<sub>3</sub>): 8.14 (s, 1H), 7.65-7.61 (m, 2H), 7.50-7.45 (m, 4H), 7.45-7.39 (m, 3H), 2.39 (d,  $J = 3.6$  Hz, 3H). **<sup>19</sup>F NMR** (376 MHz,  $\delta$  ppm/CDCl<sub>3</sub>): -115.9 (s). **HRMS** (ESI)  $m/z$ : [M+H]<sup>+</sup> Calcd for C<sub>16</sub>H<sub>14</sub>BrFNO<sub>2</sub> 350.0186; found 350.0188.

#### X-Ray Data Collection and Structure Refinement Details for compound **6f**:

A good quality single crystal of size 0.26 x 0.17 x 0.11 mm, was selected under a polarizing microscope and was mounted on a glass fiber for data collection. Single crystal X-ray data for compound **6f** were collected on the Bruker APEX-II CCD area-detector at 272(2) K. Data collection was performed using  $\omega$ -scans of at 272(2) K by Bruker APEX2. Cell determination, and data reduction was performed using the Bruker SAINT software. Structure solution and refinement were performed by using SHELX-97. Refinement of coordinates and anisotropic thermal parameters of non-hydrogen atoms were carried out by the full-matrix least-squares method. The hydrogen atoms attached to carbon atoms were generated with idealized geometries and isotropically refined using a riding model.

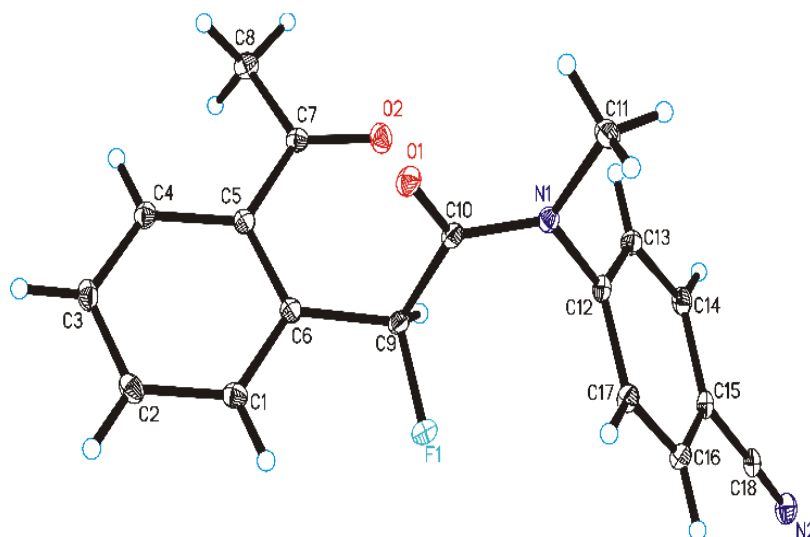

**Figure 1** ORTEP diagram drawn with 30% ellipsoid probability for non-H atoms of the crystal structure of compound **6f** determined at 273K.

**Crystallization:** The compound **6f** (5mg) was dissolved in a 1 mL mixture of *n*-hexane/DCM (1:1) and placed in a cabinet to evaporate slowly. After two days, **6f** was obtained as white crystals.

**Table 1** Crystal data and structure refinement details for **6f**.

| <b>Compound</b>                                                 | <b>6f</b>                                                       |
|-----------------------------------------------------------------|-----------------------------------------------------------------|
| Empirical formula                                               | C <sub>18</sub> H <sub>15</sub> F N <sub>2</sub> O <sub>2</sub> |
| Formula weight                                                  | 310.32                                                          |
| Crystal System                                                  | Monoclinic                                                      |
| Space group                                                     | <i>P</i> 2 <sub>1</sub> / <i>c</i>                              |
| <i>a</i> (Å)                                                    | 7.912(2)                                                        |
| <i>b</i> (Å)                                                    | 13.614(3)                                                       |
| <i>c</i> (Å)                                                    | 14.075(4)                                                       |
| $\alpha$ (°)                                                    | 90.00                                                           |
| $\beta$ (°)                                                     | 101.443(8)                                                      |
| $\gamma$ (°)                                                    | 90.00                                                           |
| <i>V</i> (Å <sup>3</sup> )                                      | 1485.9(7)                                                       |
| <i>Z</i>                                                        | 4                                                               |
| <i>D</i> <sub>c</sub> (g/cm <sup>3</sup> )                      | 1.387                                                           |
| <i>F</i> <sub>000</sub>                                         | 648                                                             |
| $\mu$ (mm <sup>-1</sup> )                                       | 0.100                                                           |
| $\theta_{\max}$ (°)                                             | 28.32                                                           |
| Total reflections                                               | 22134                                                           |
| Unique reflections                                              | 3677                                                            |
| Reflections [ <i>I</i> > 2σ( <i>I</i> )]                        | 3093                                                            |
| Parameters                                                      | 210                                                             |
| <i>R</i> <sub>int</sub>                                         | 0.0504                                                          |
| Goodness-of-fit                                                 | 1.059                                                           |
| <i>R</i> [ <i>F</i> <sup>2</sup> > 2σ( <i>F</i> <sup>2</sup> )] | 0.0441                                                          |
| <i>wR</i> ( <i>F</i> <sup>2</sup> , all data)                   | 0.1033                                                          |
| CCDC No.                                                        | 2024815                                                         |

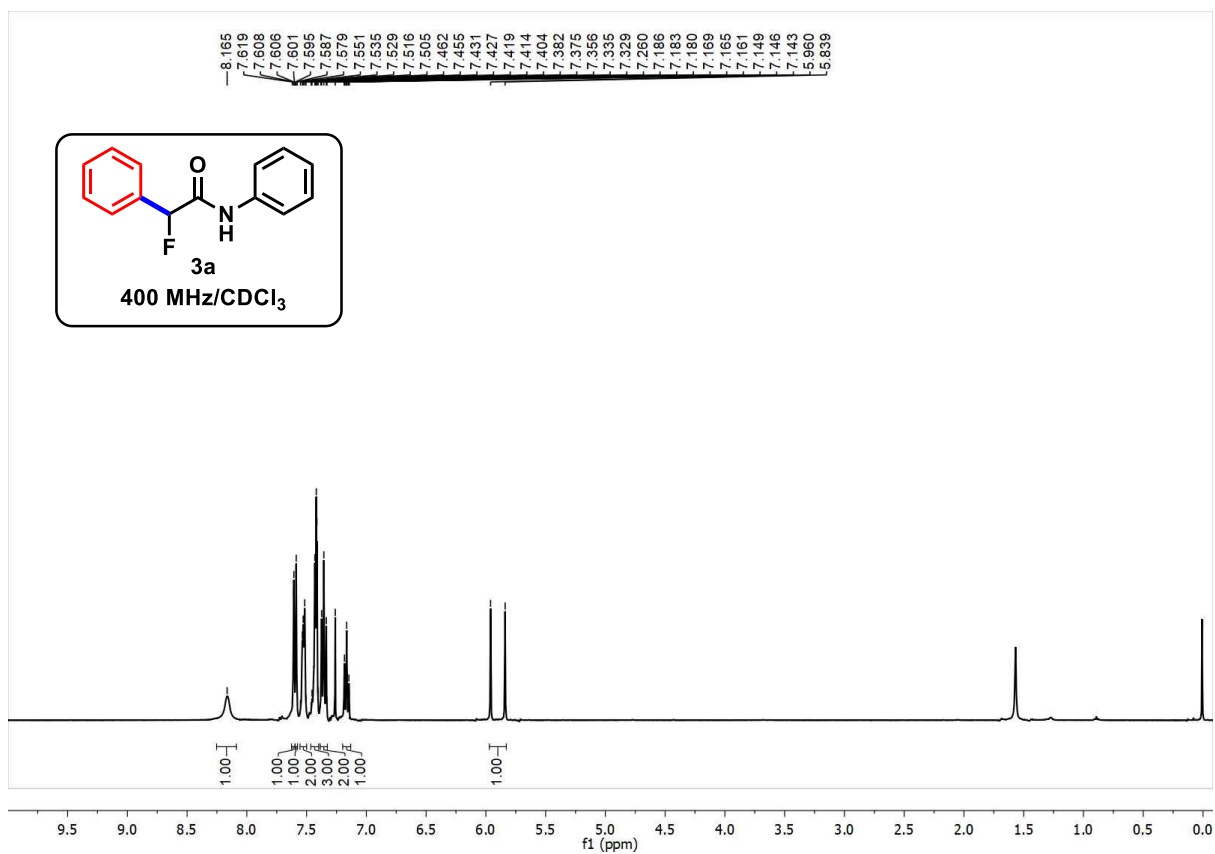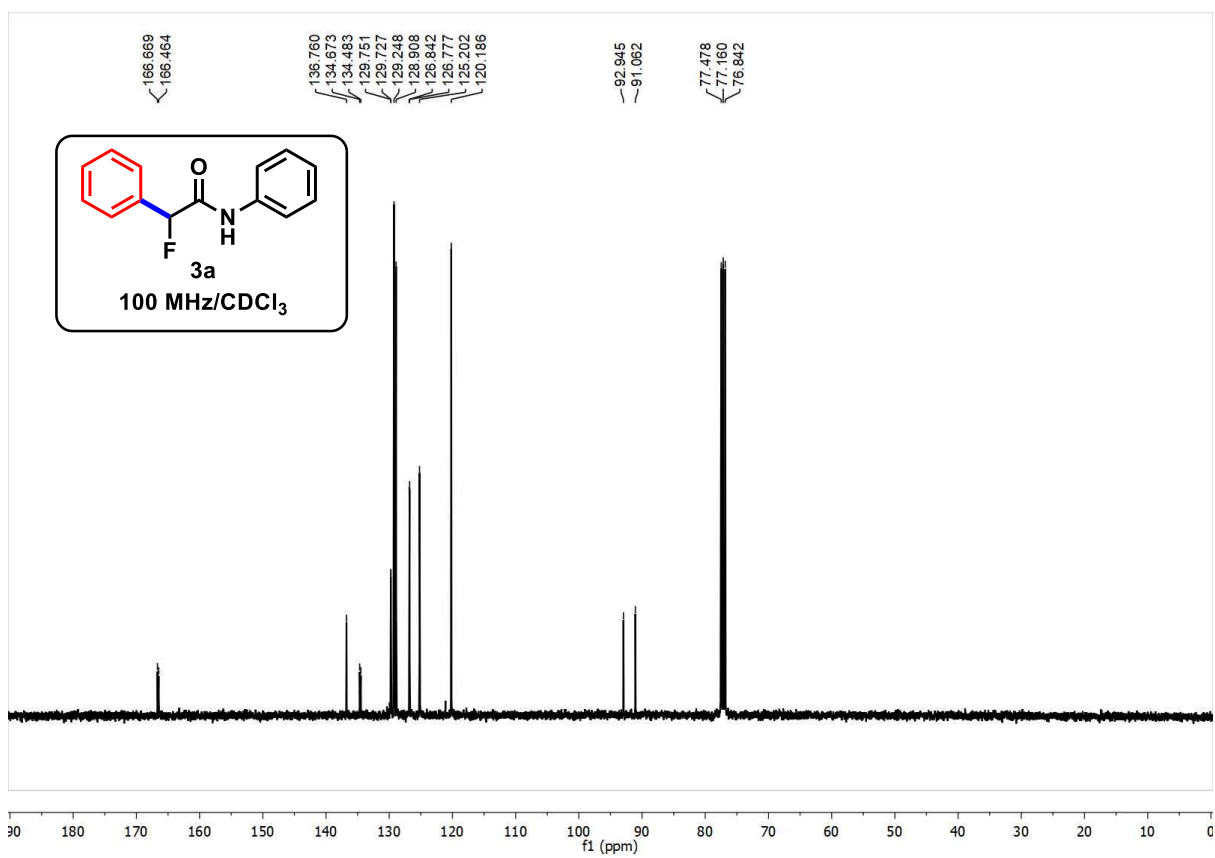

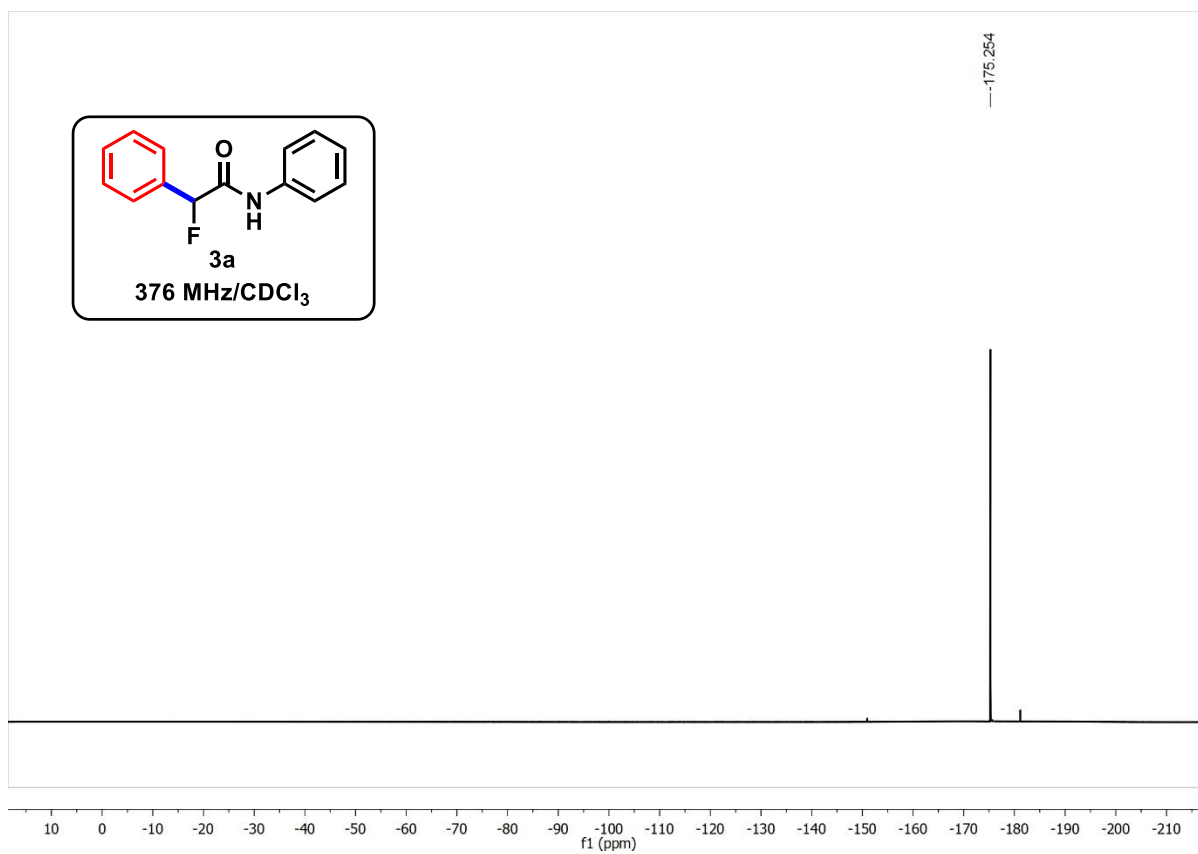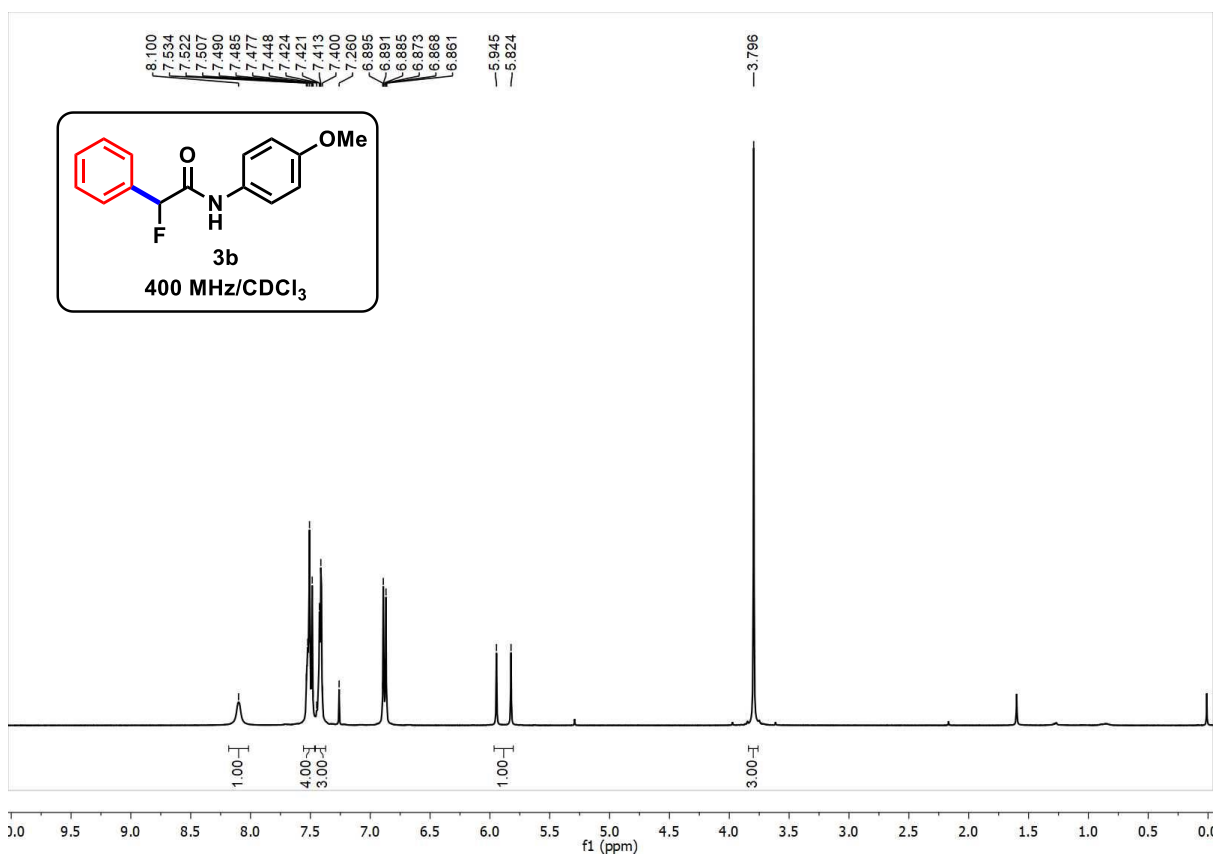

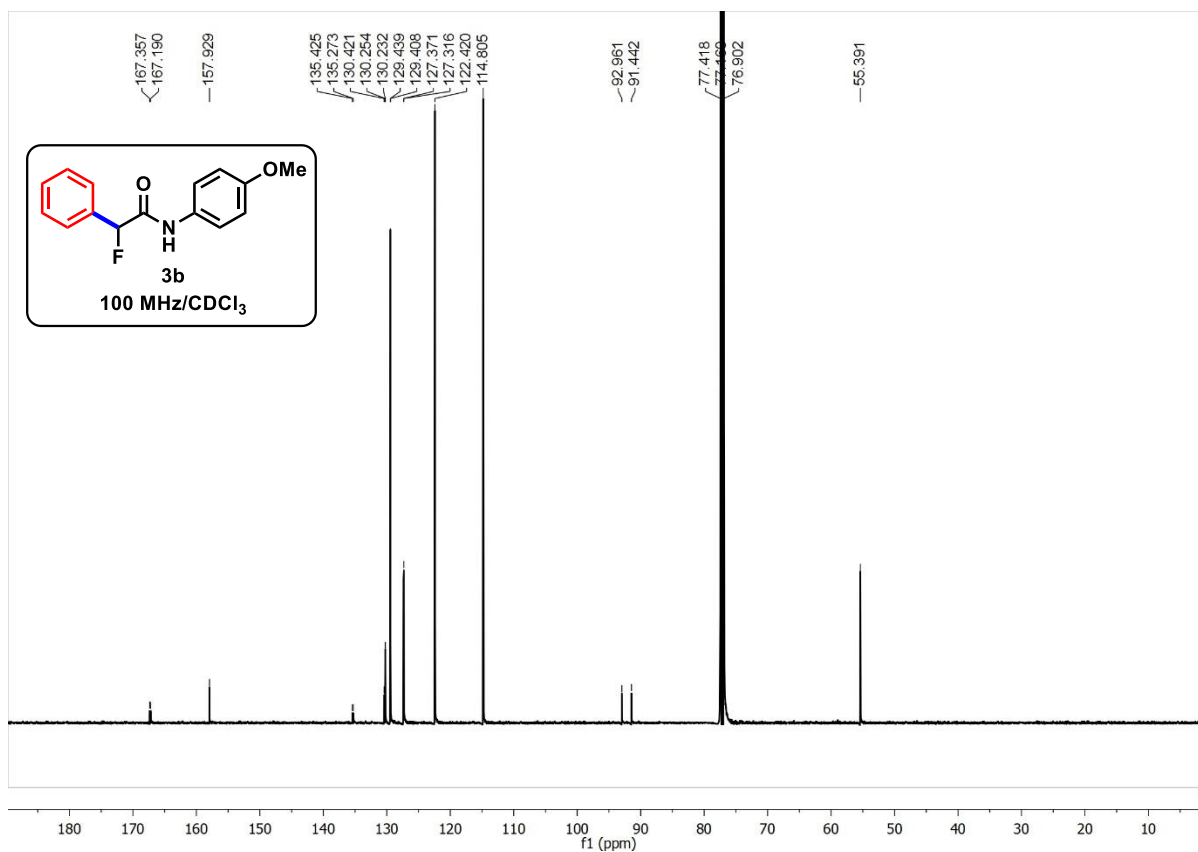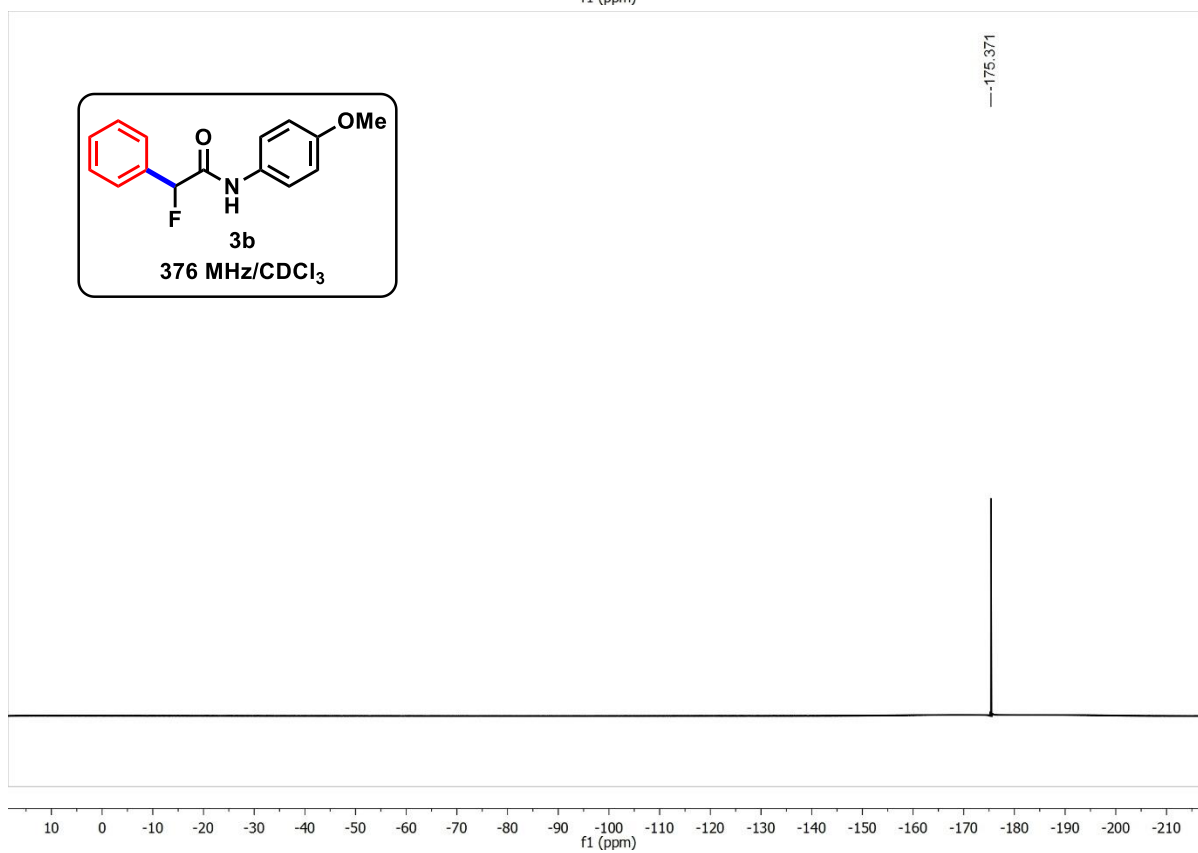

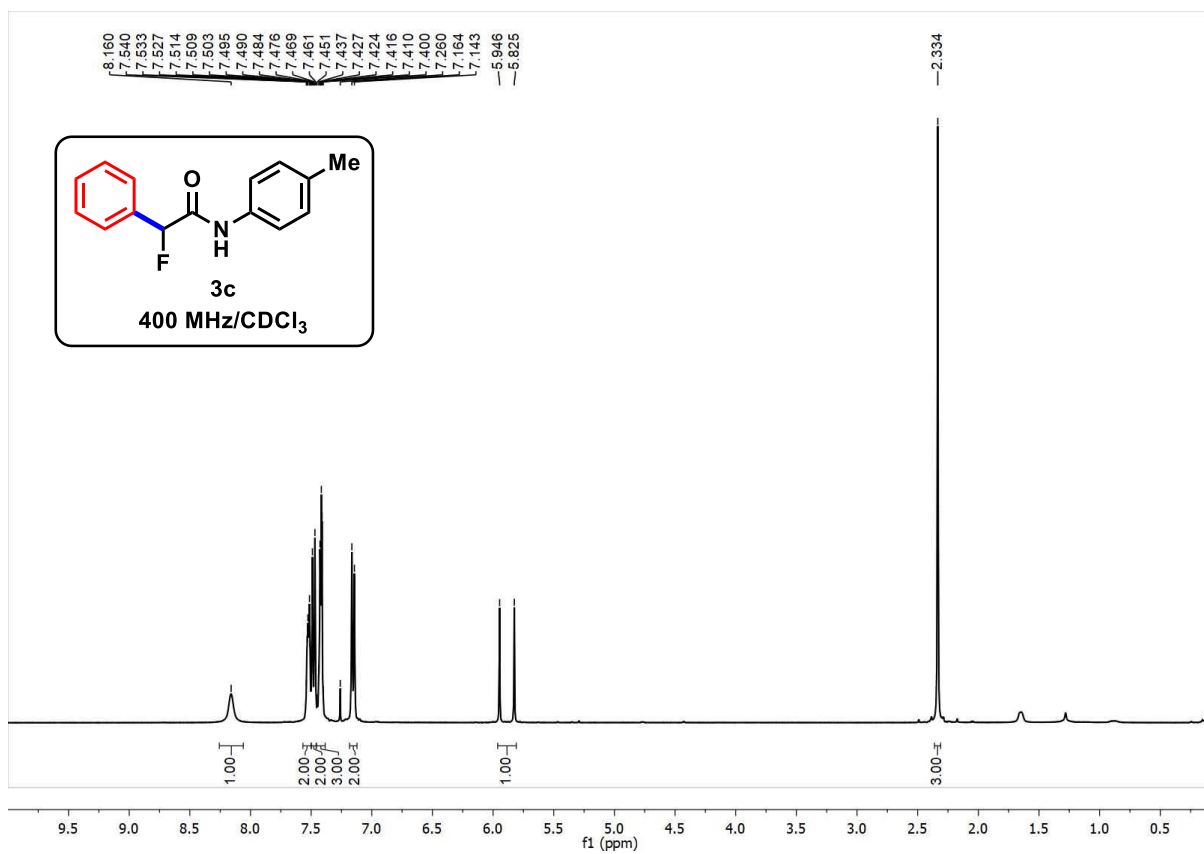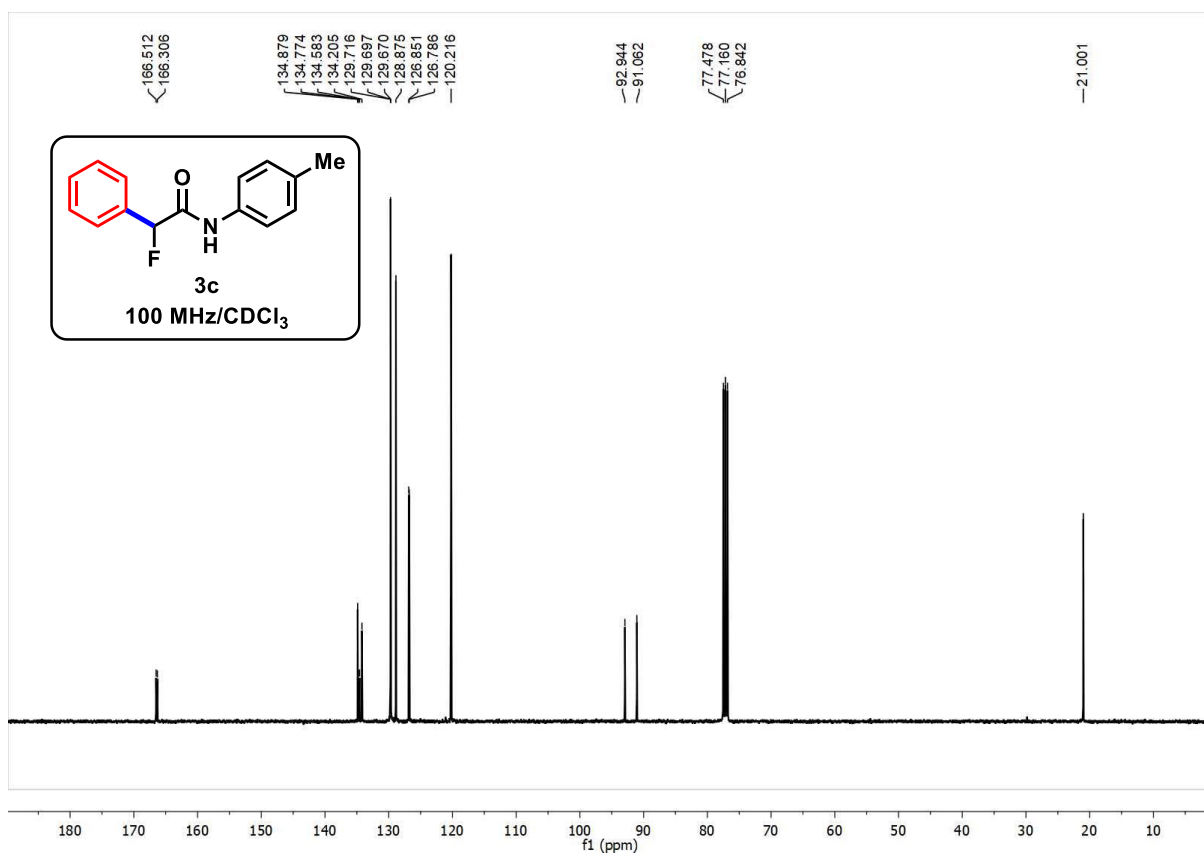



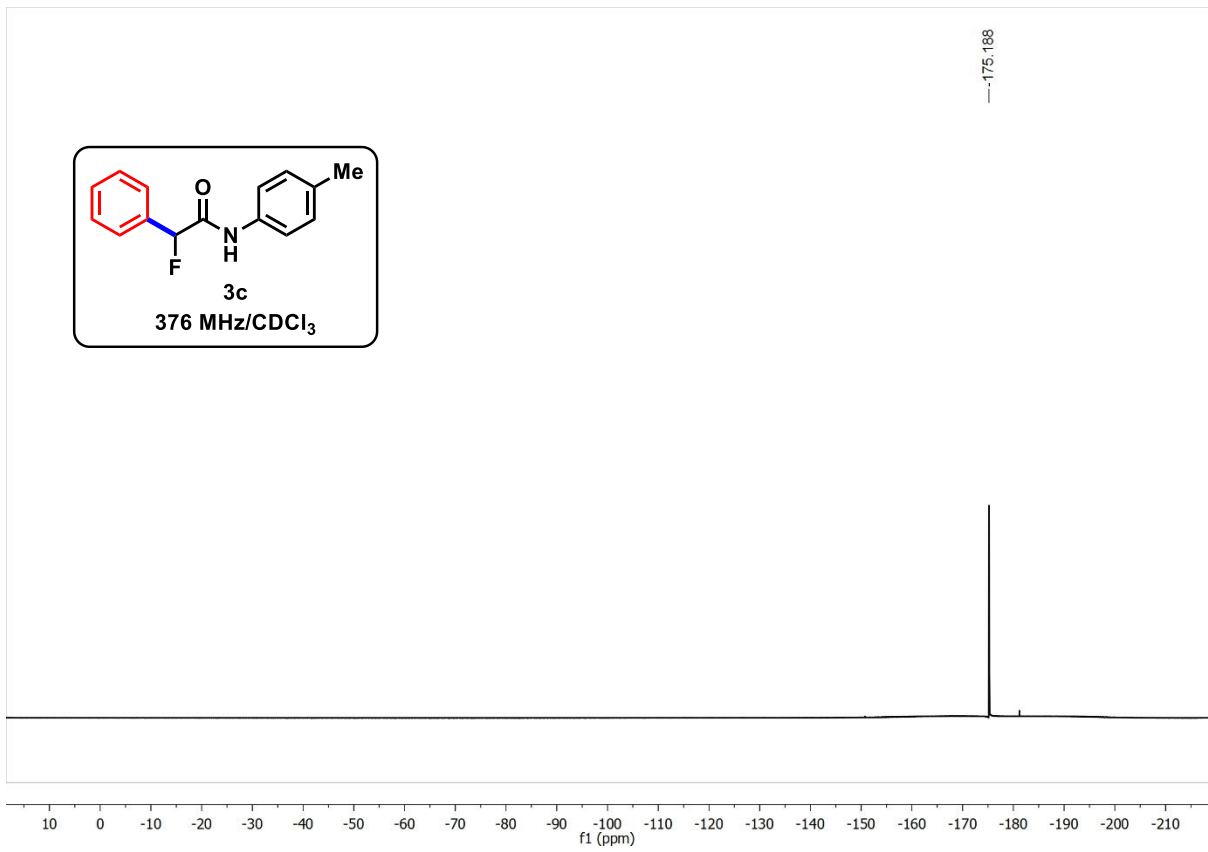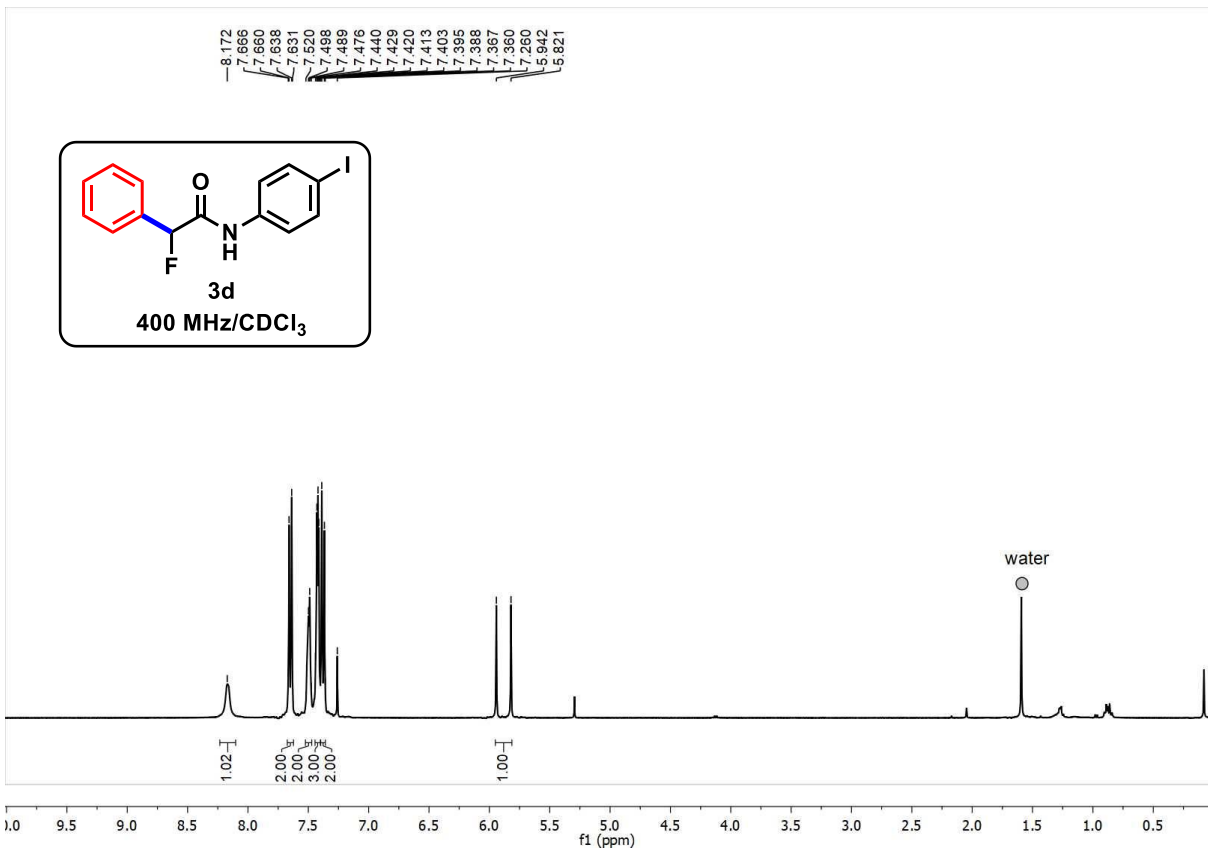

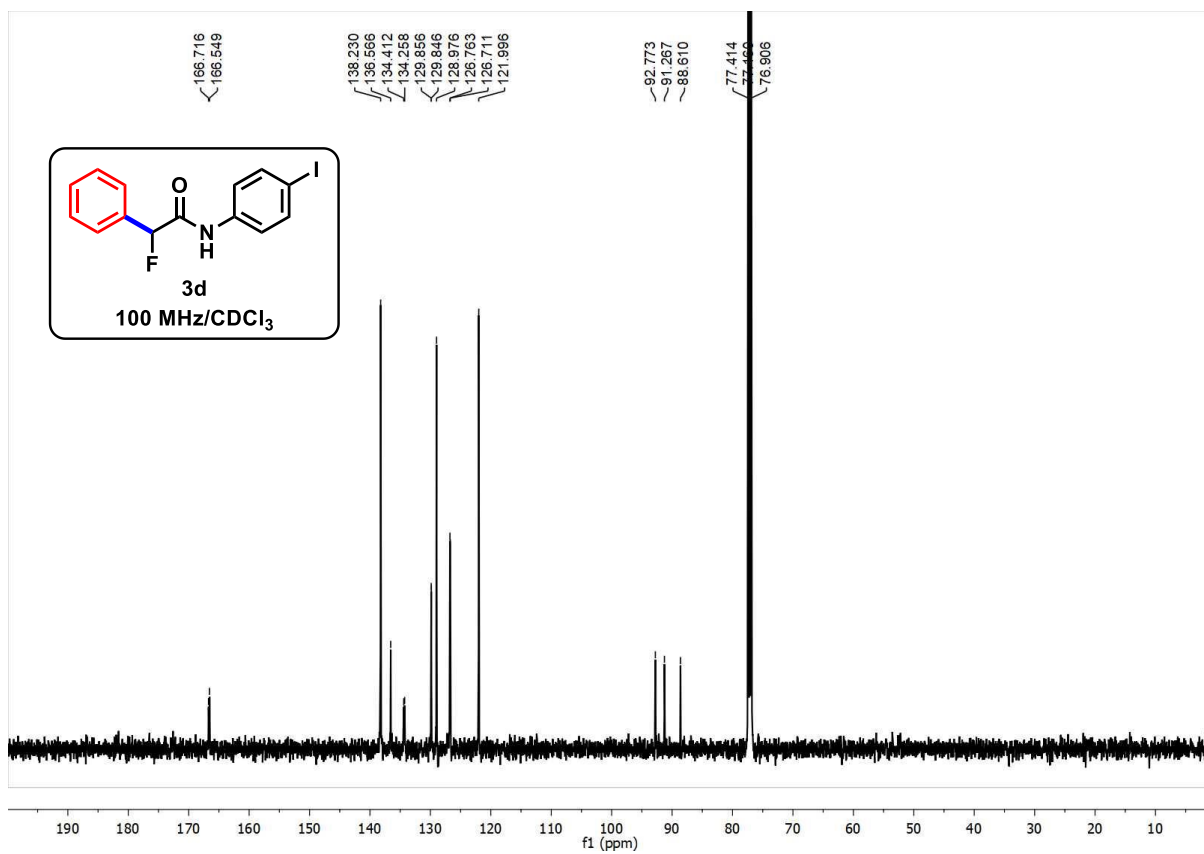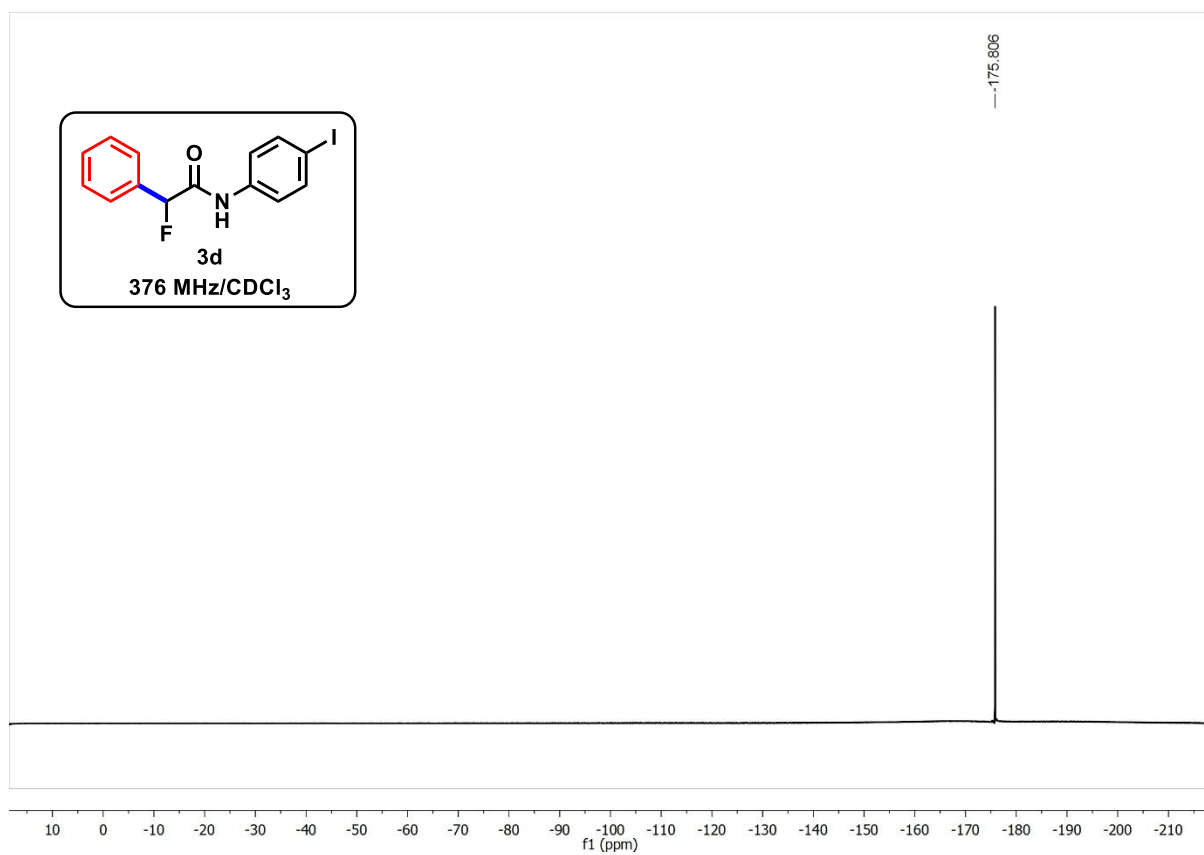

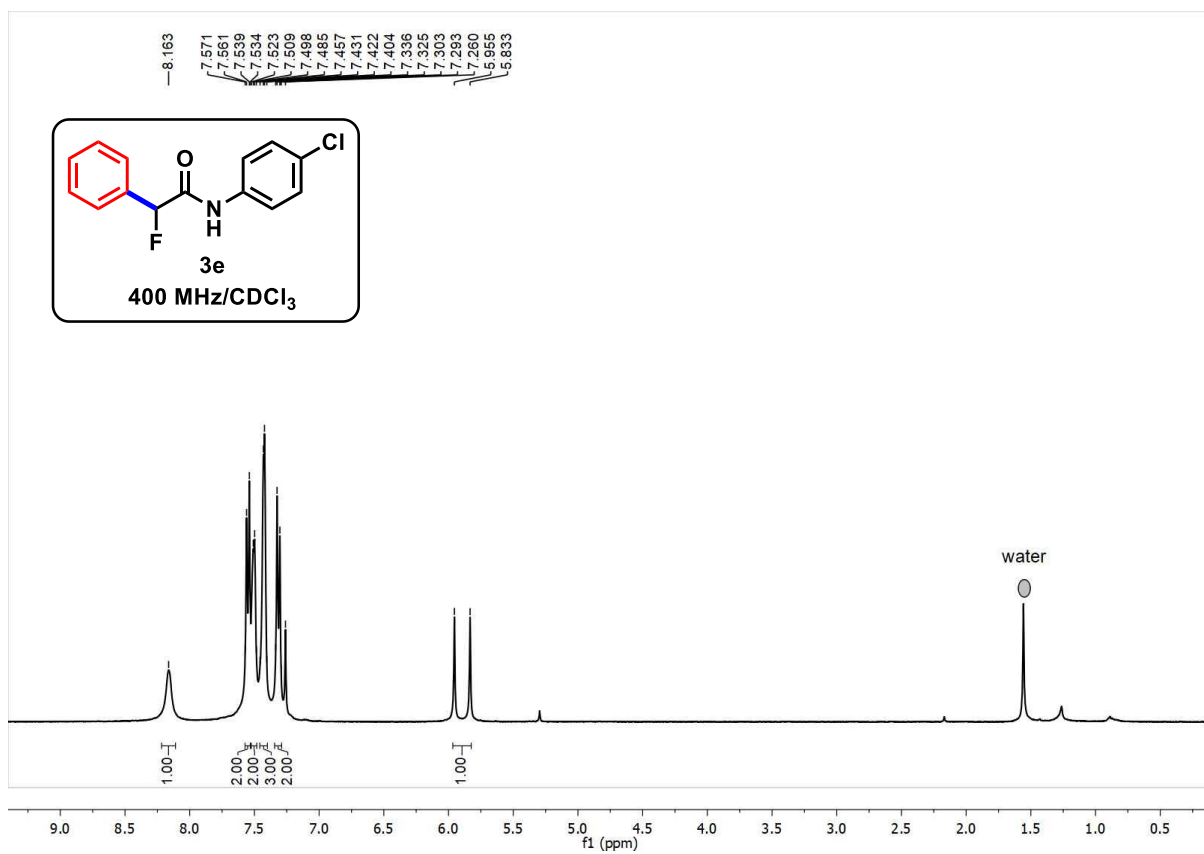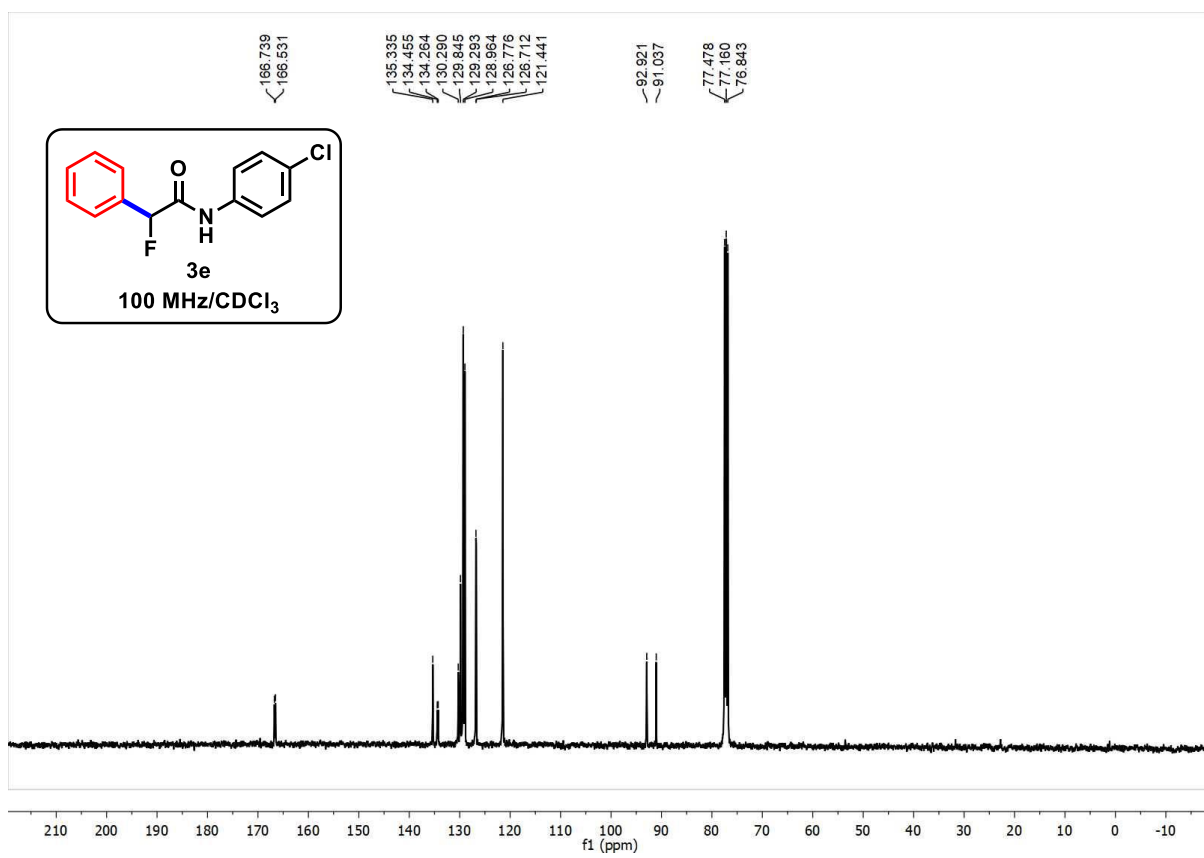

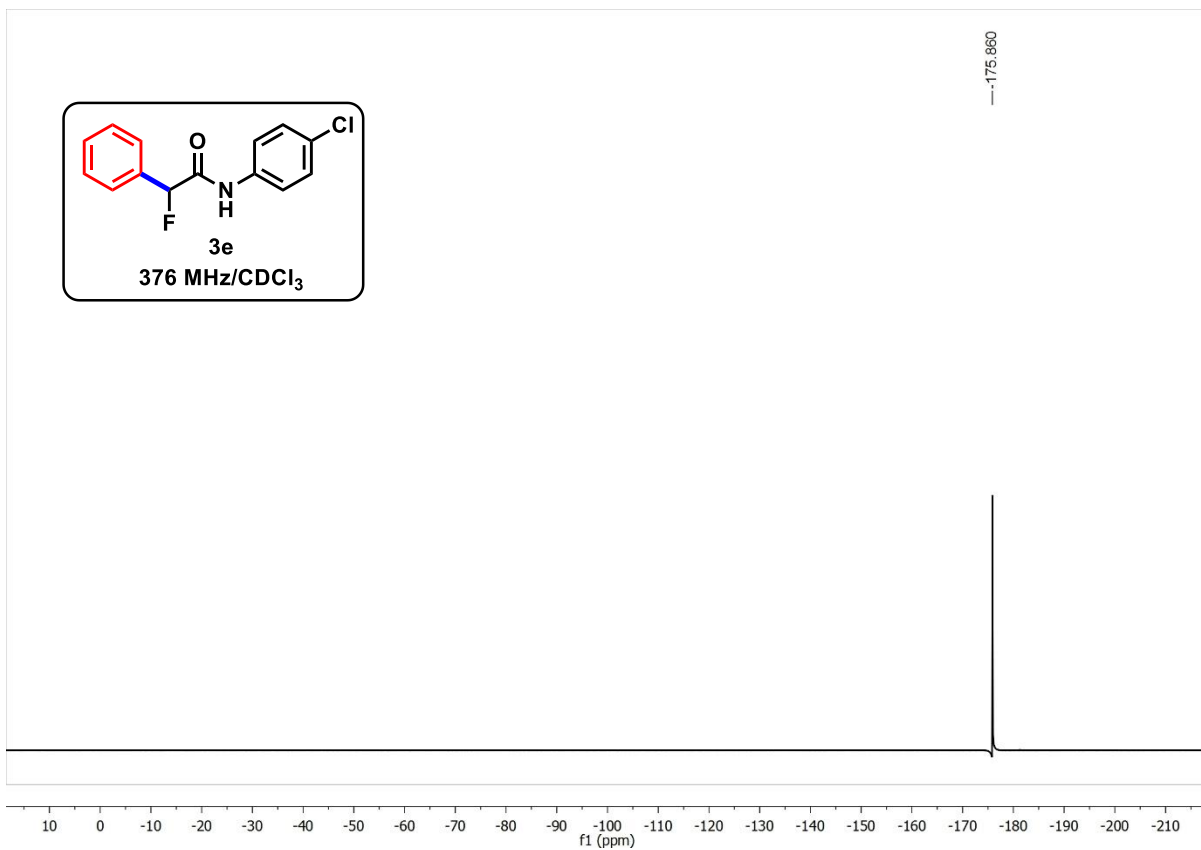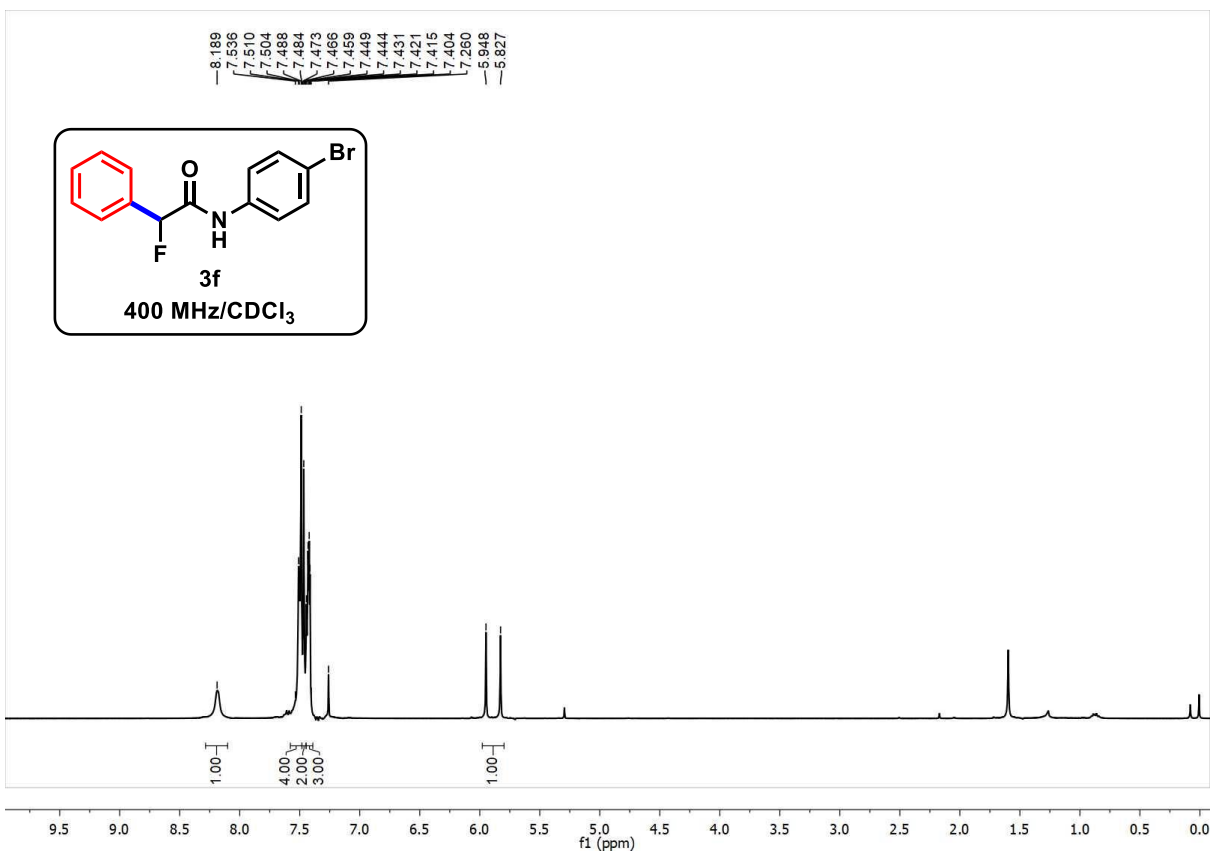



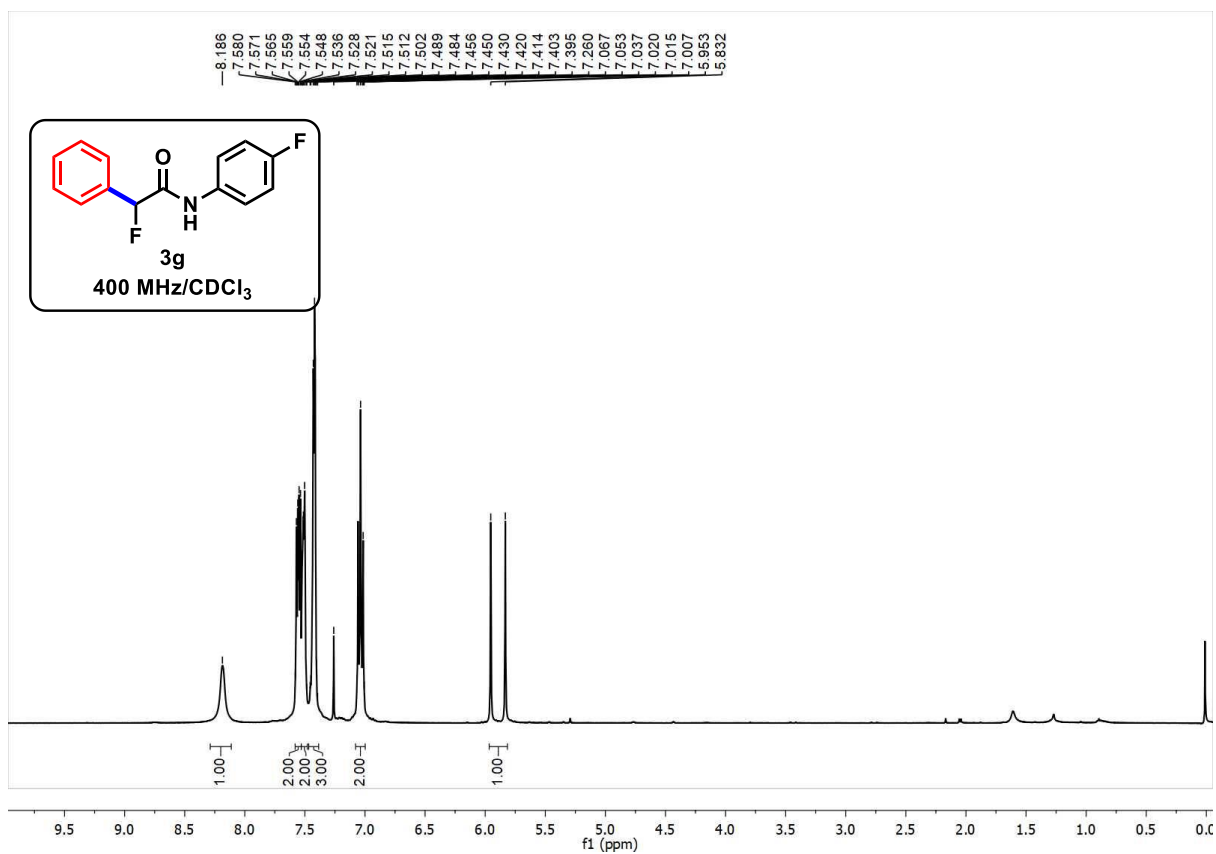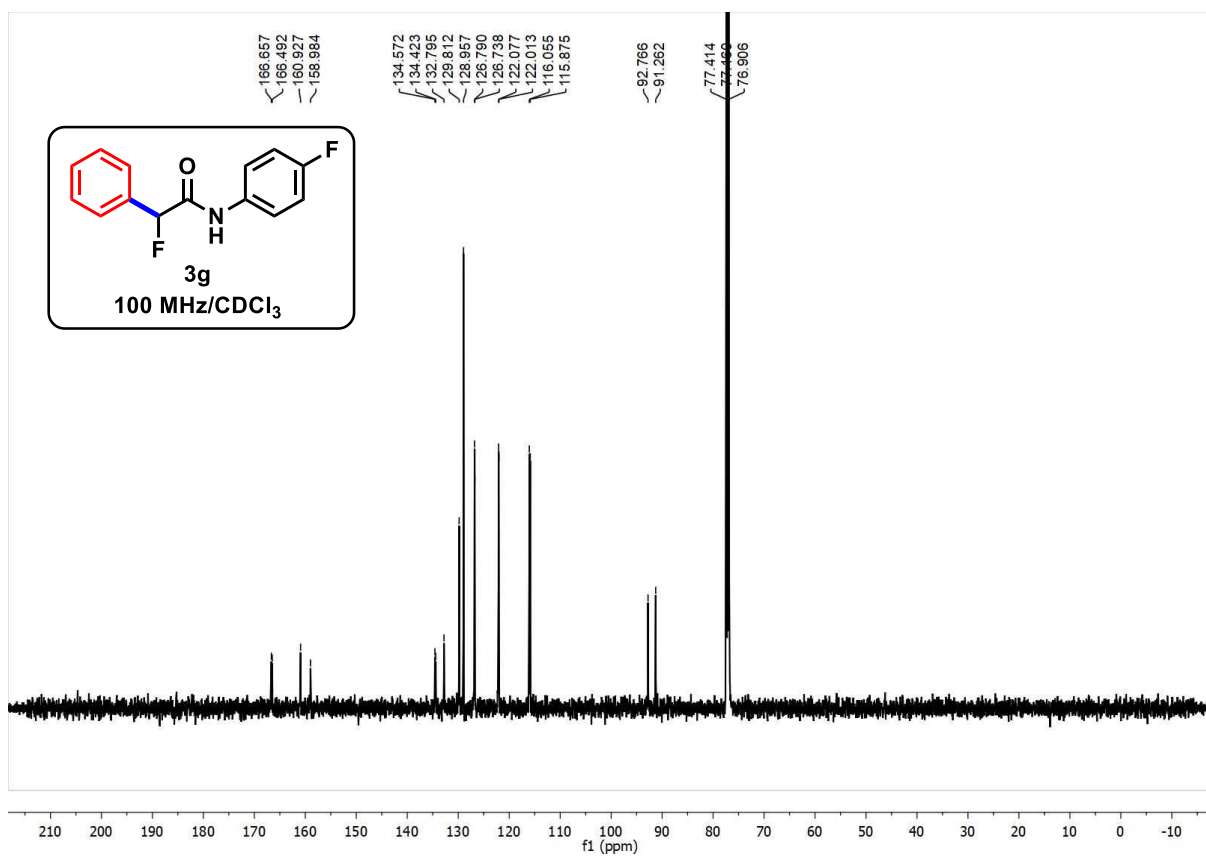

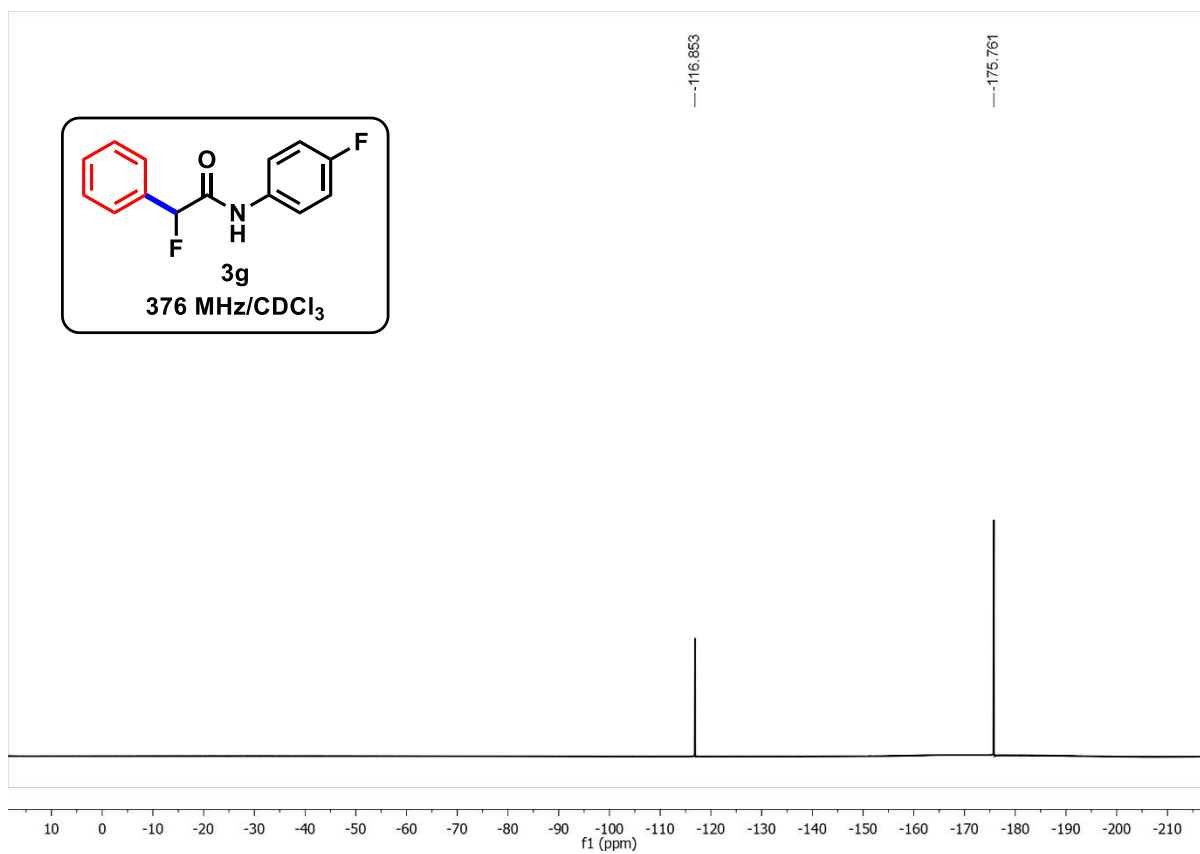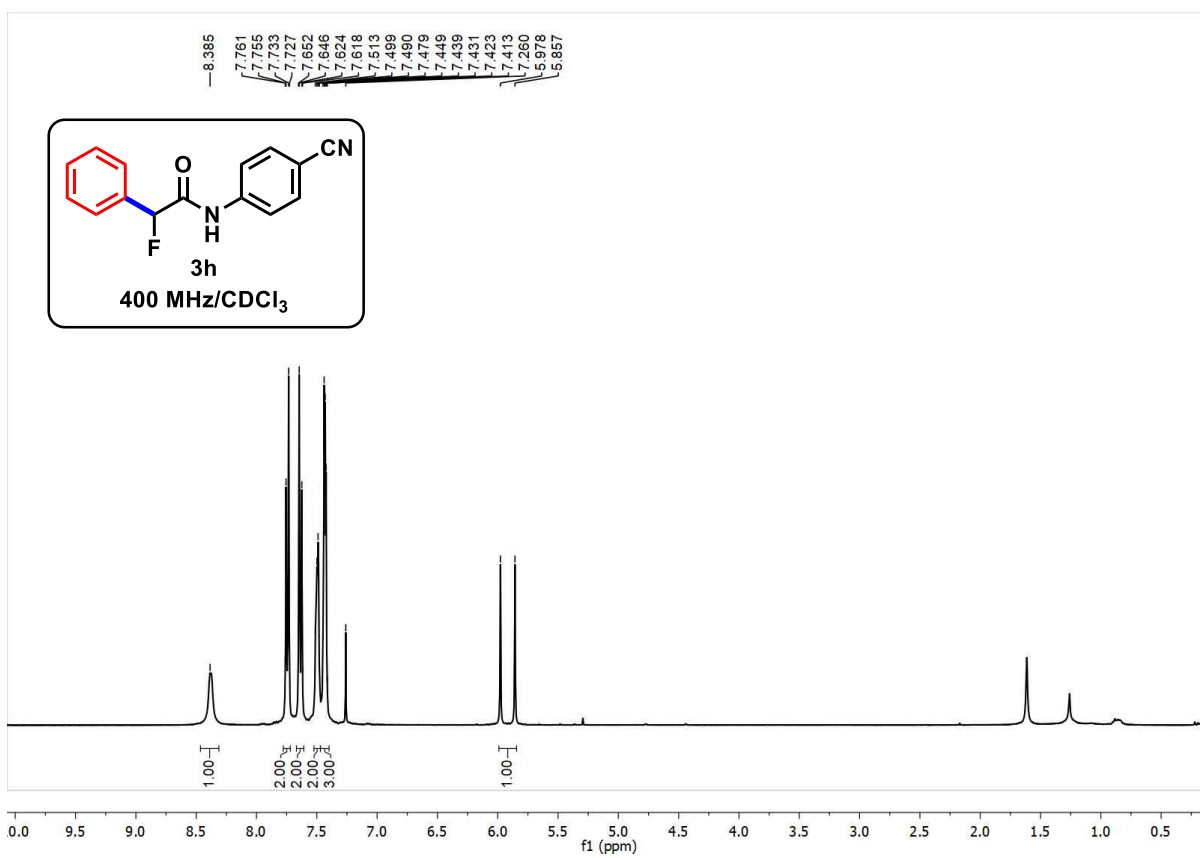

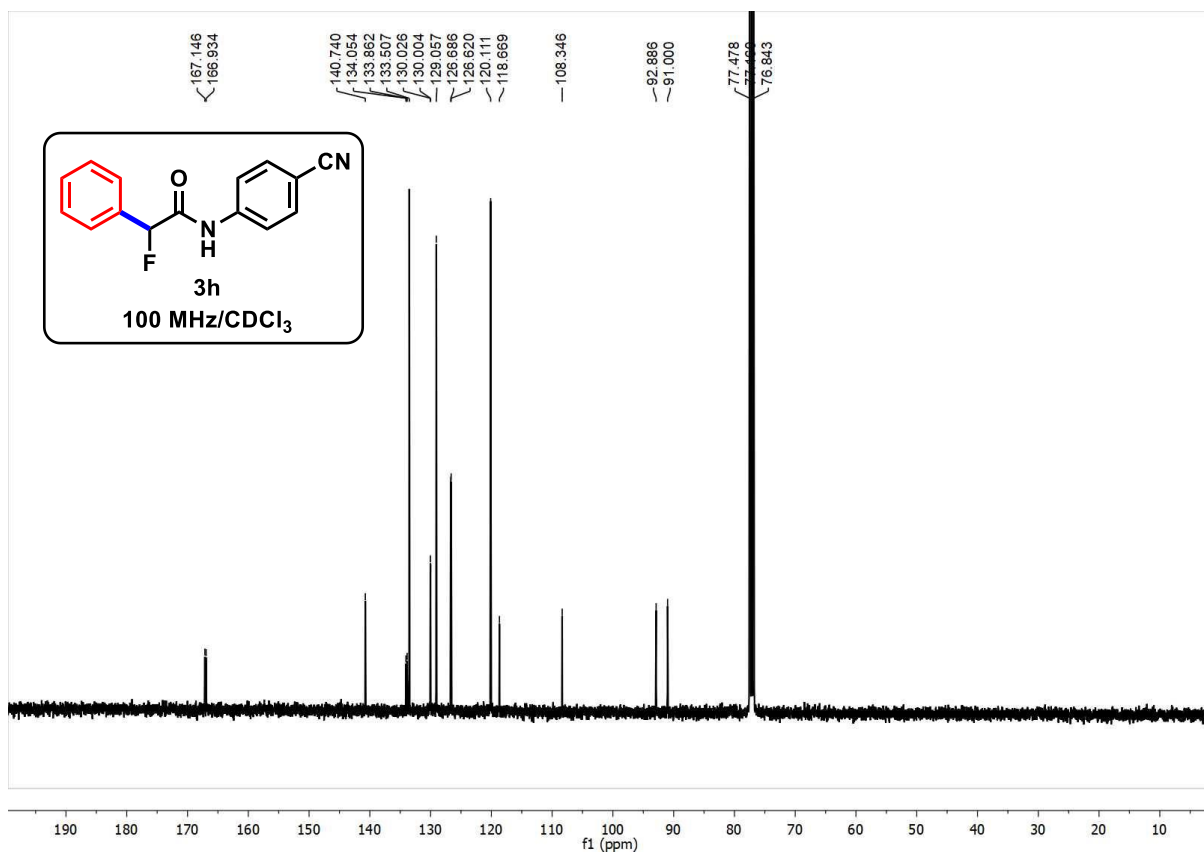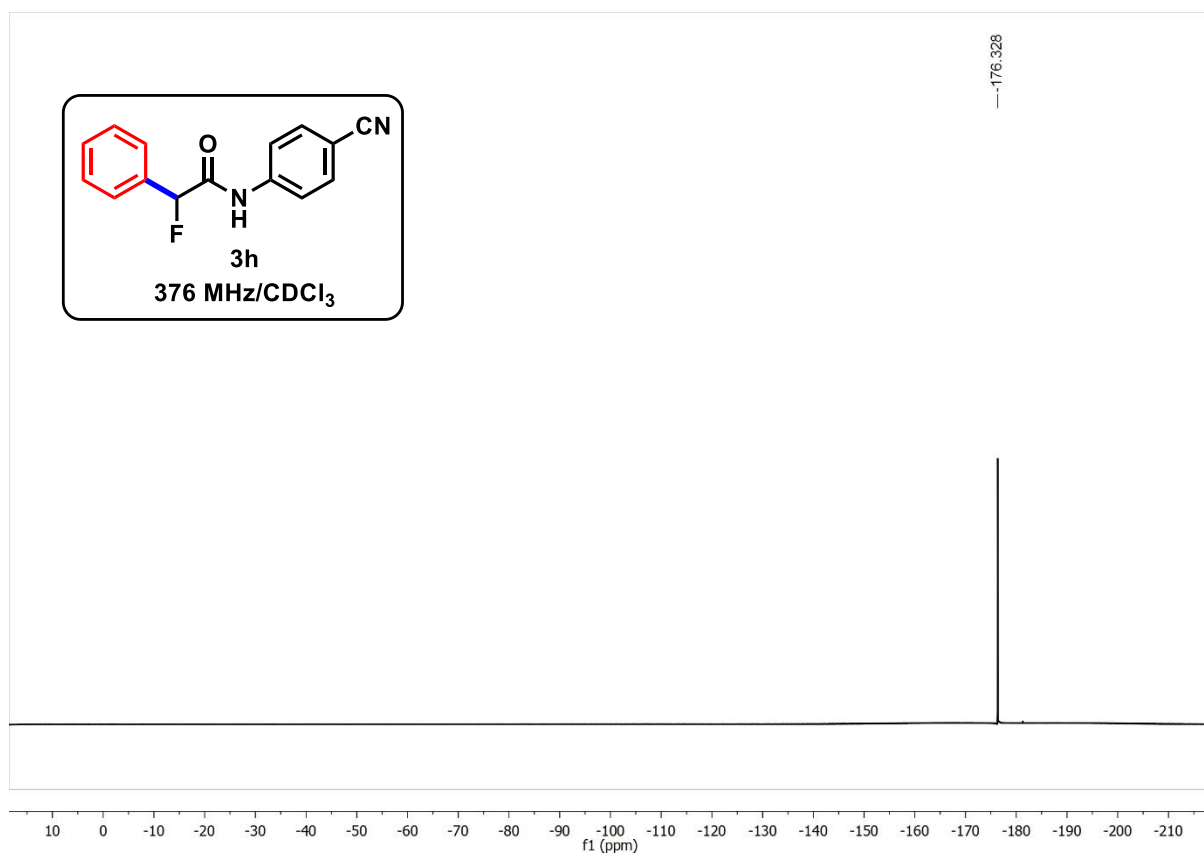



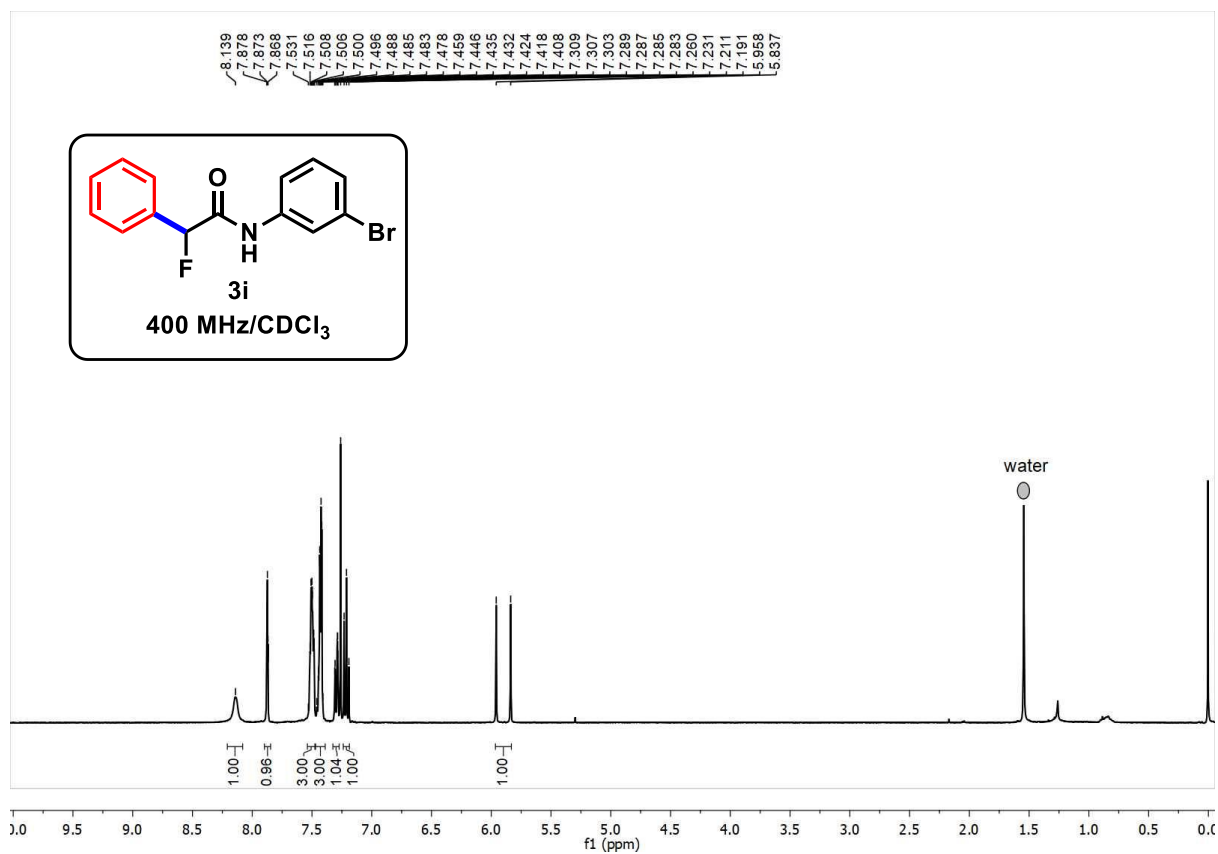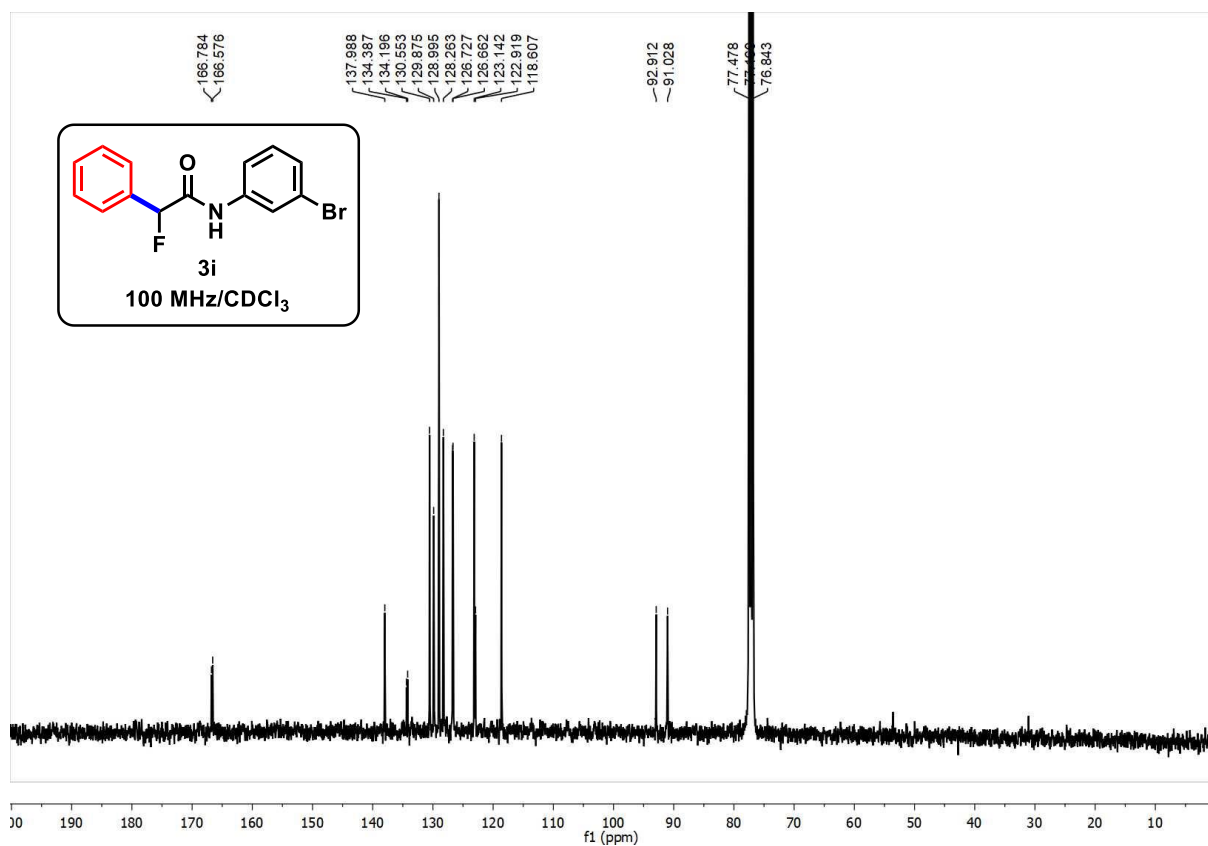

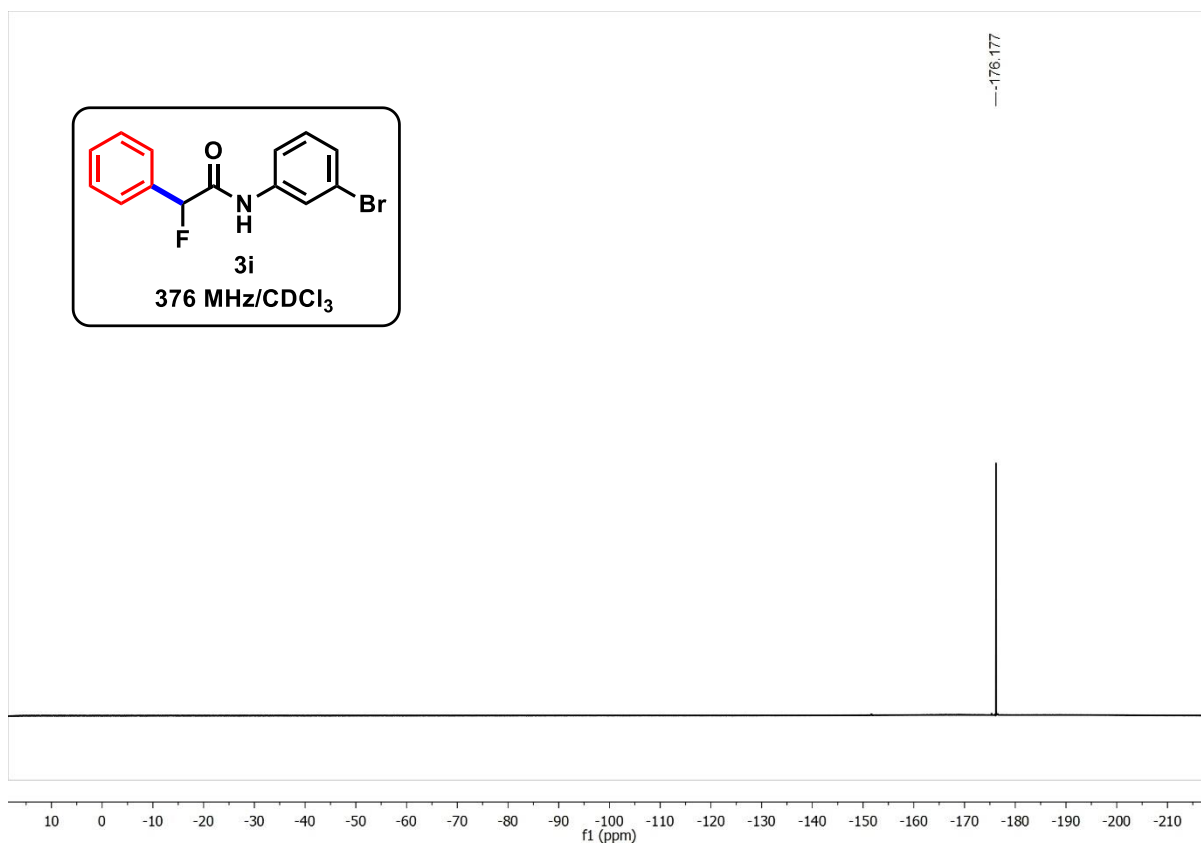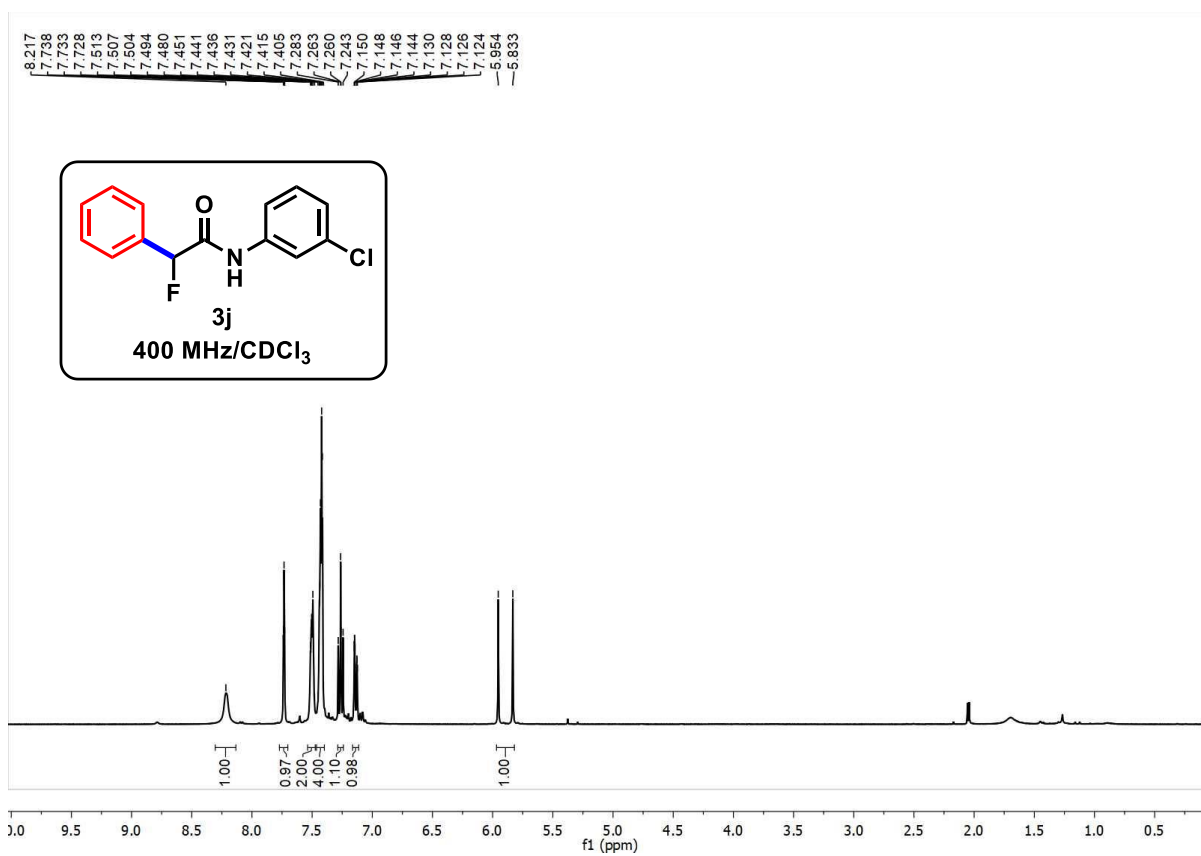

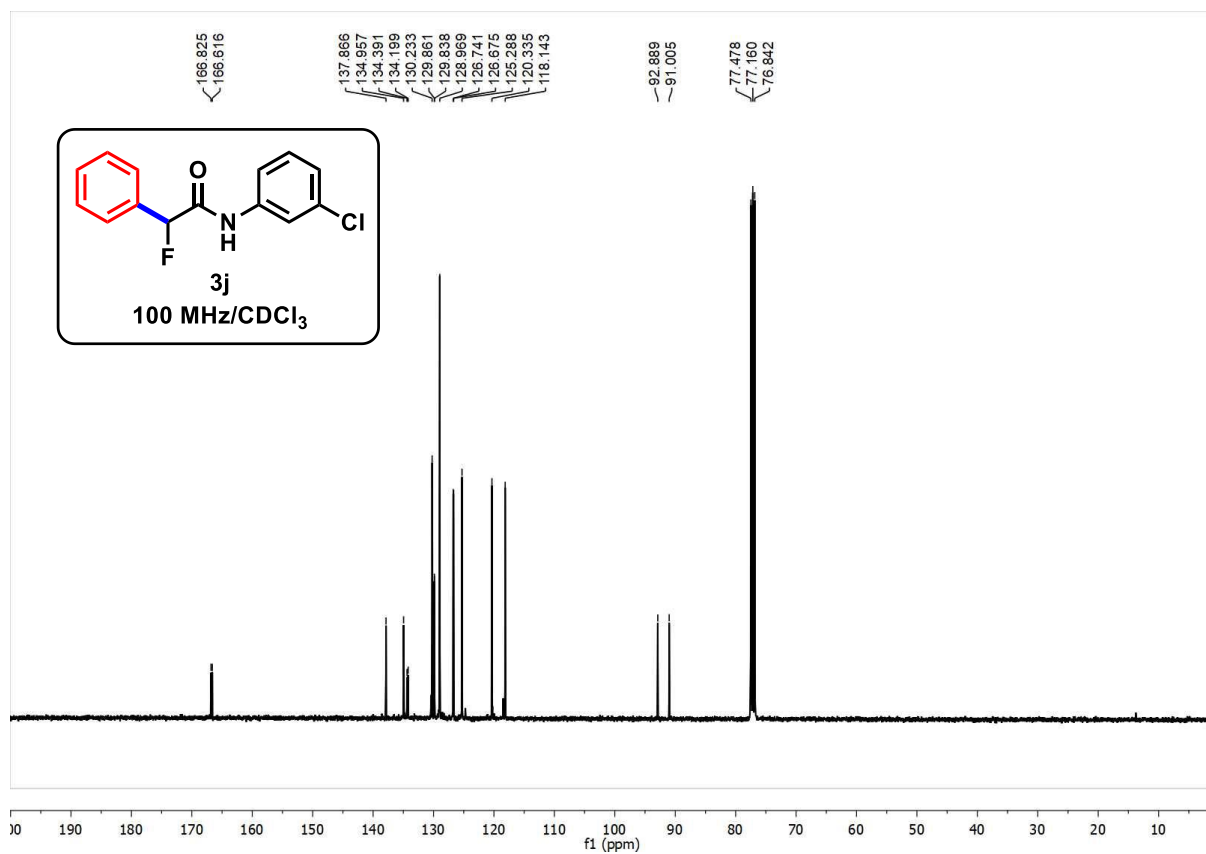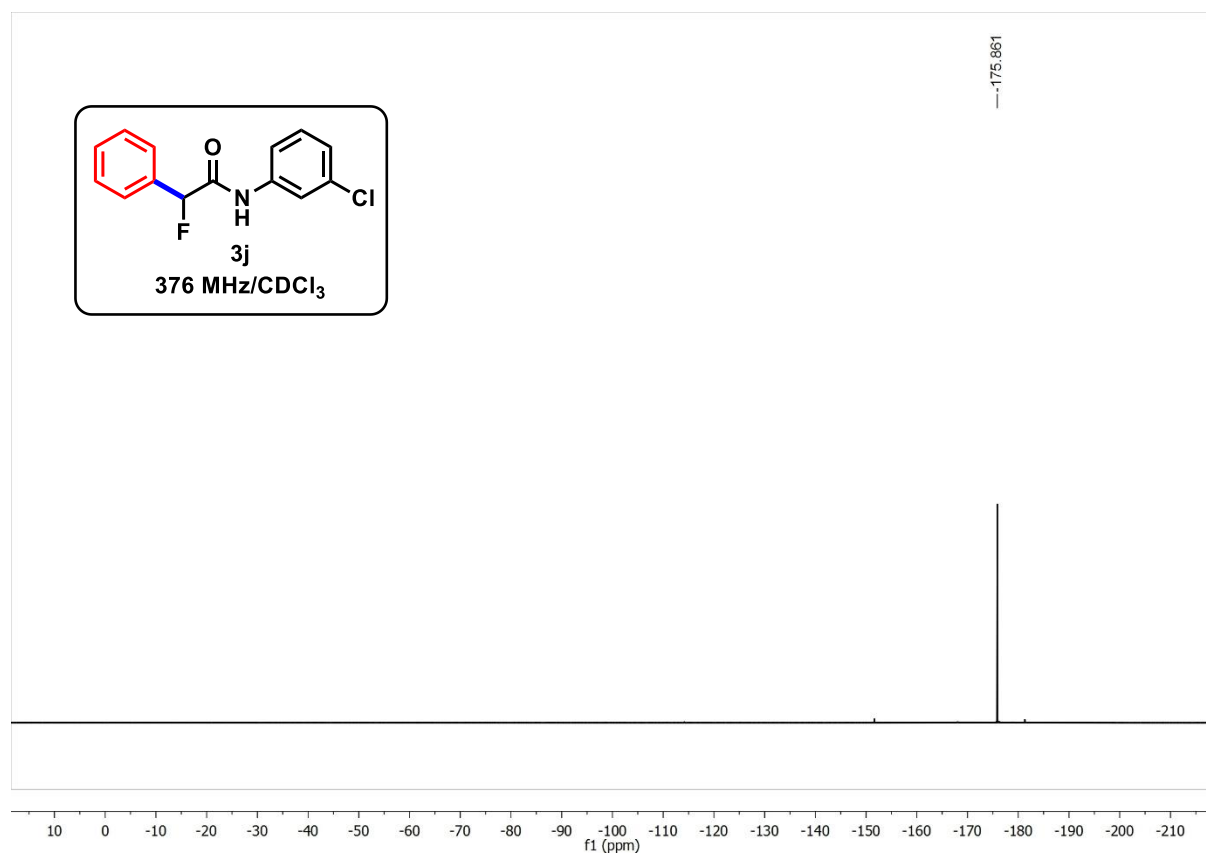

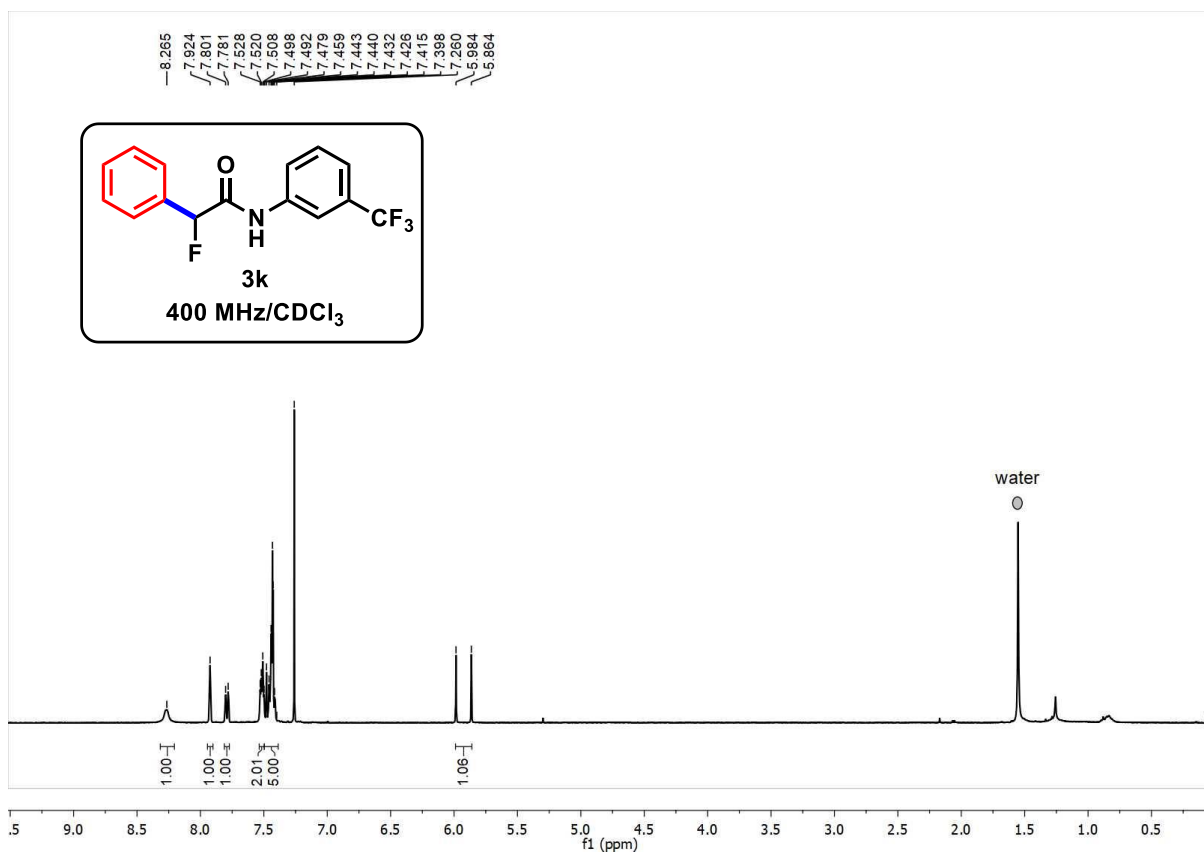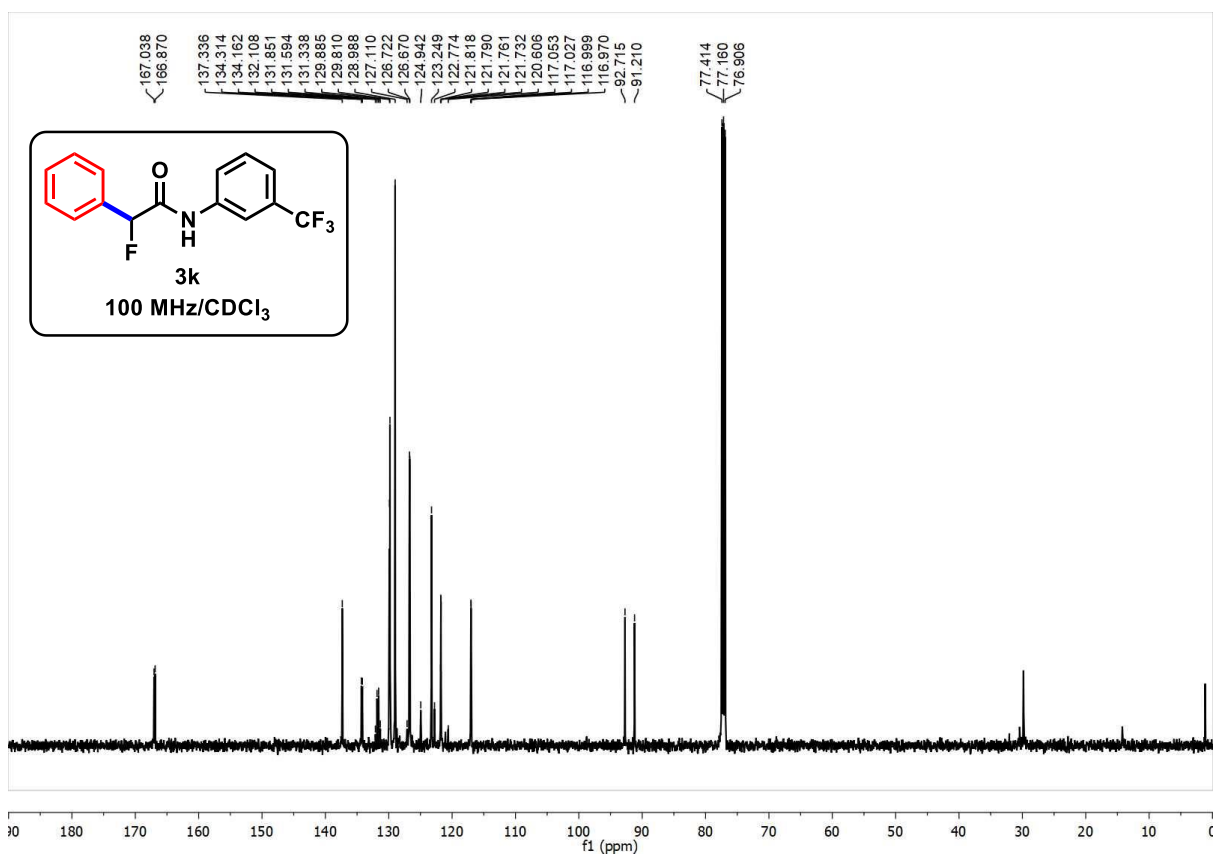

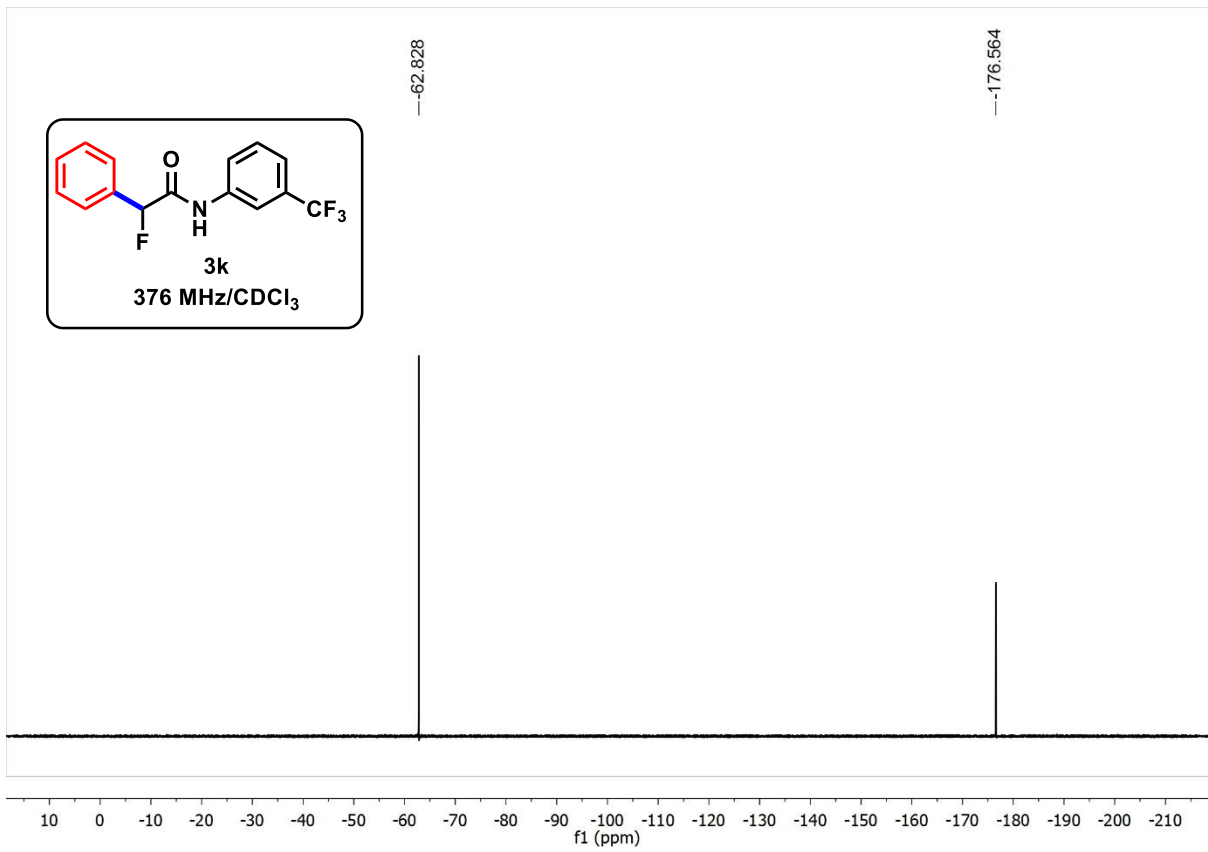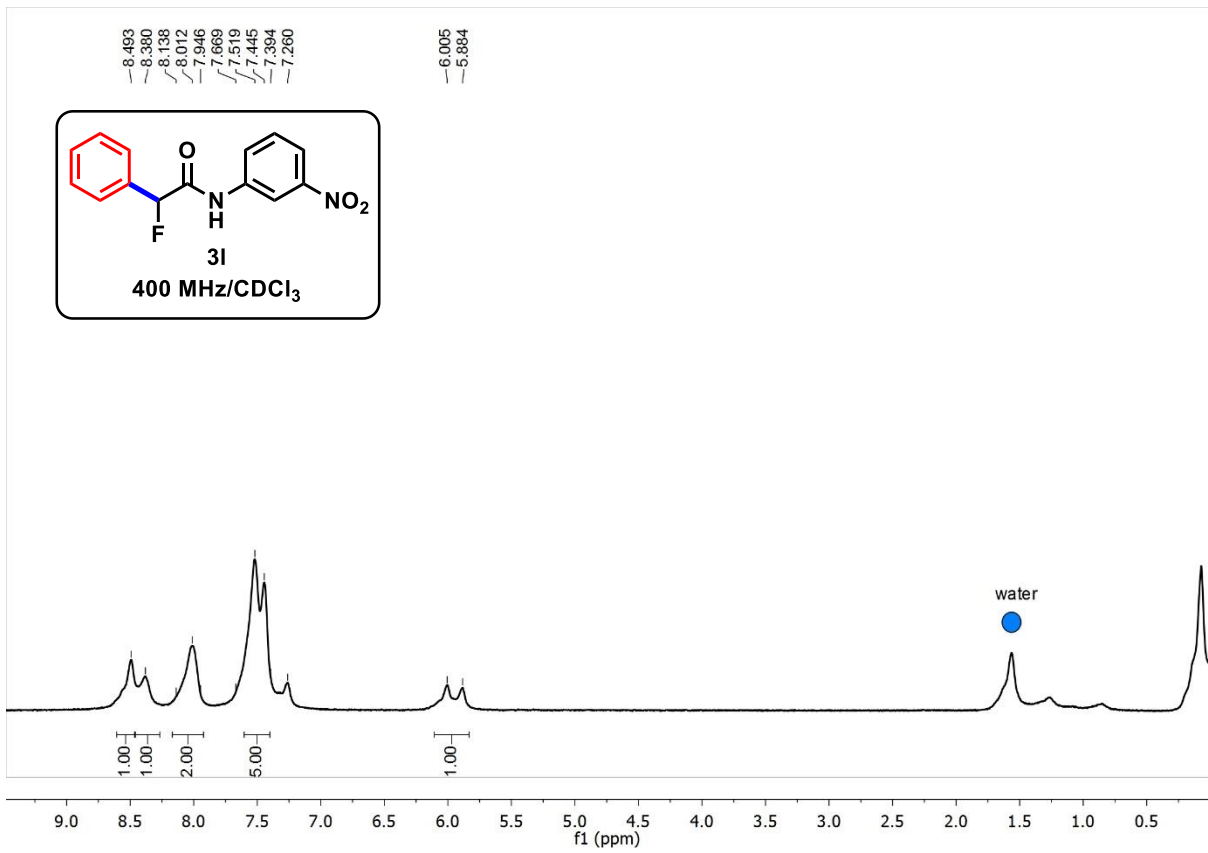

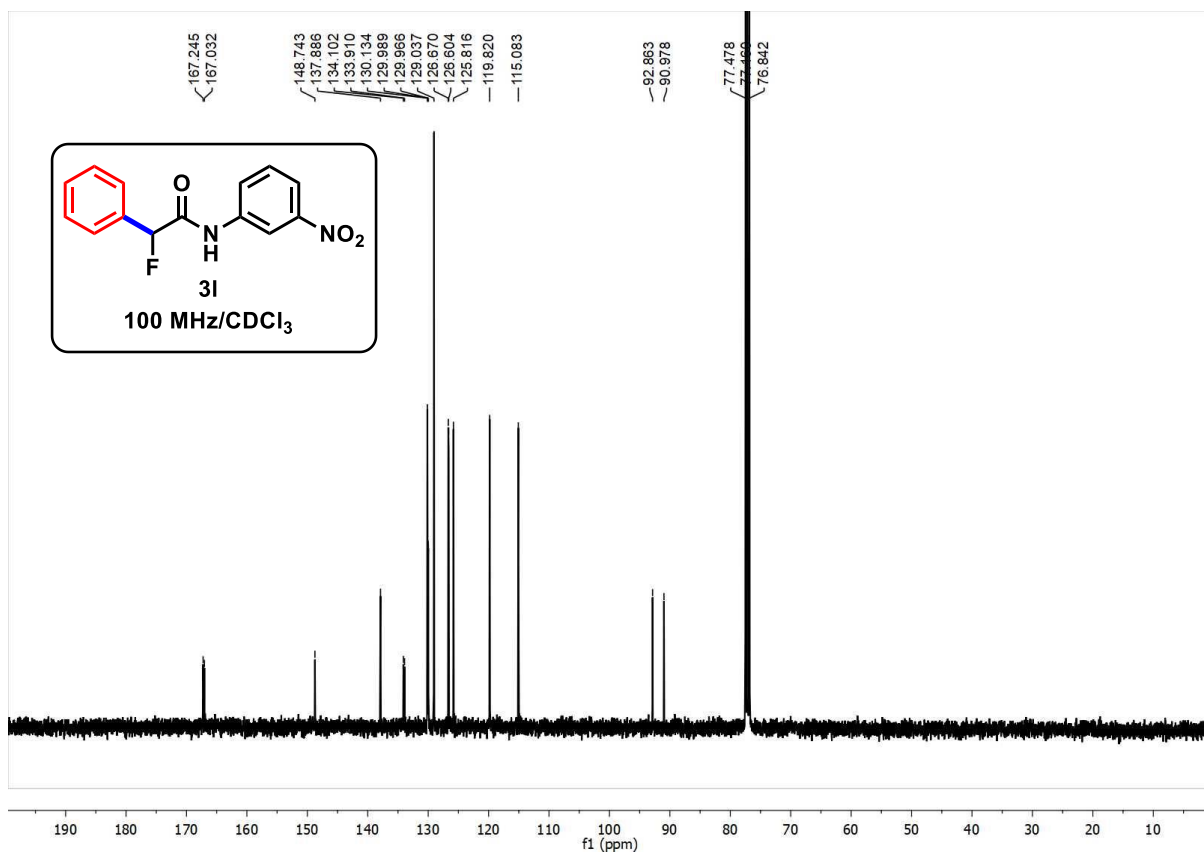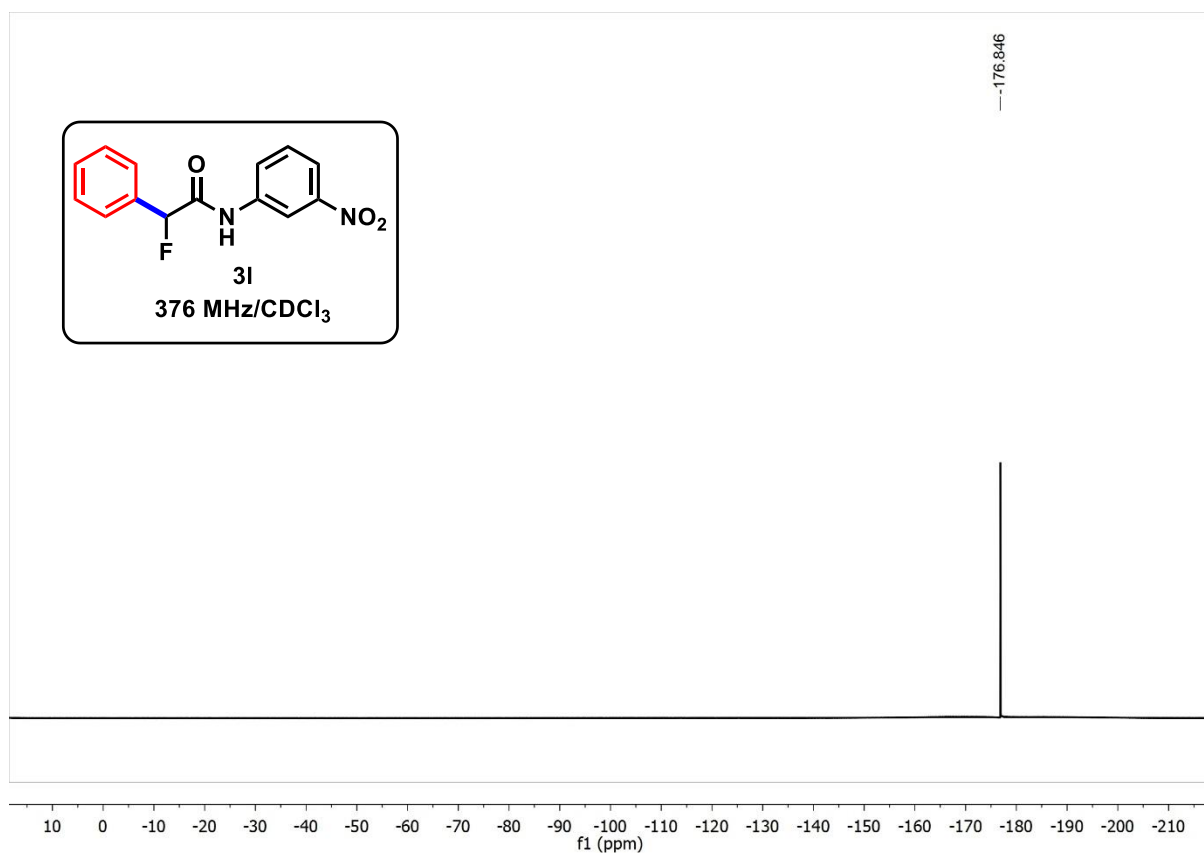

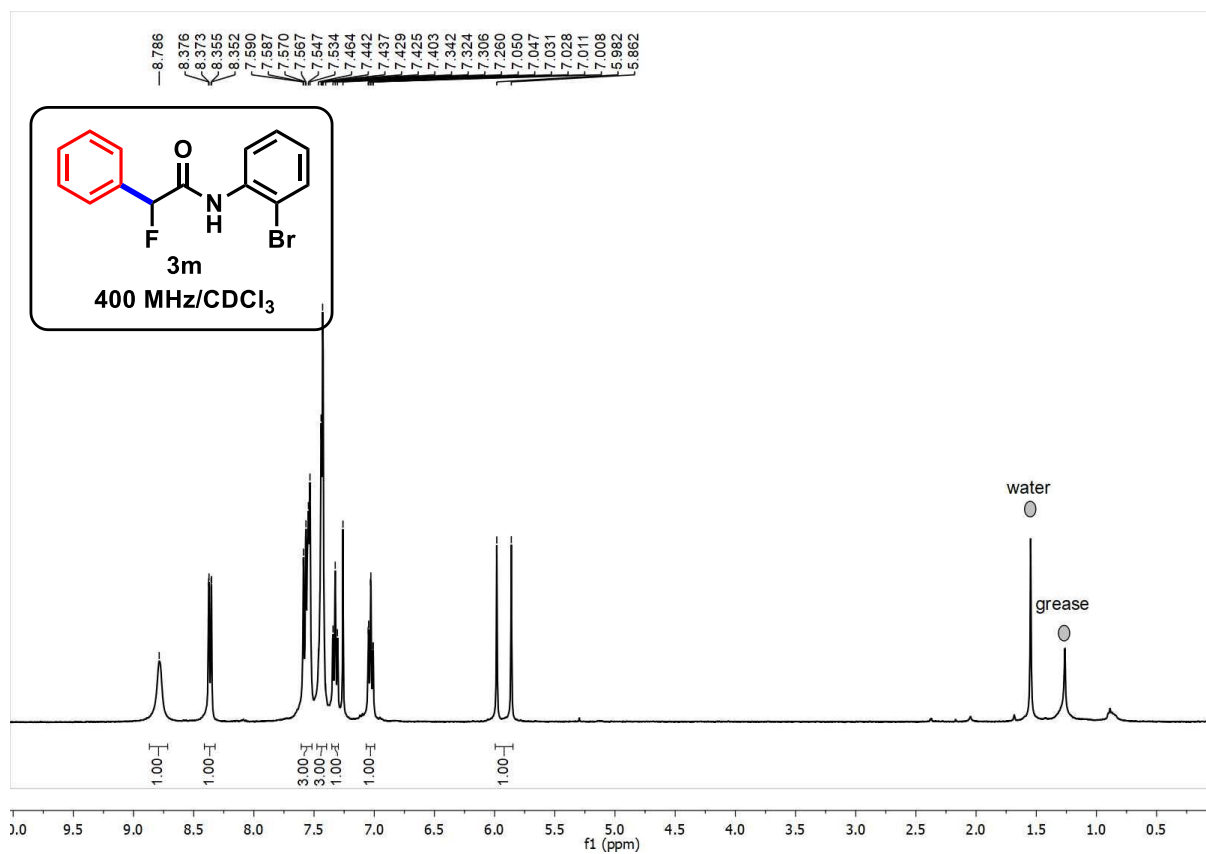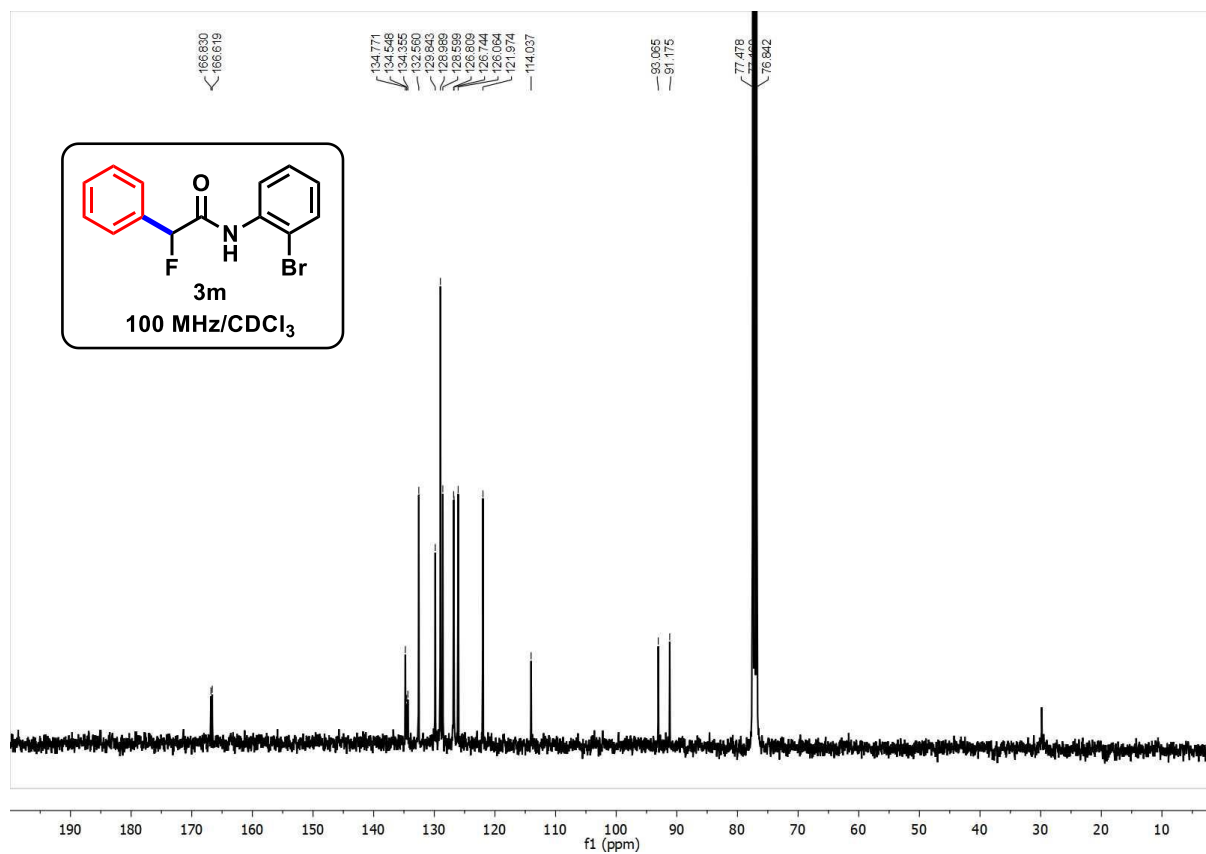

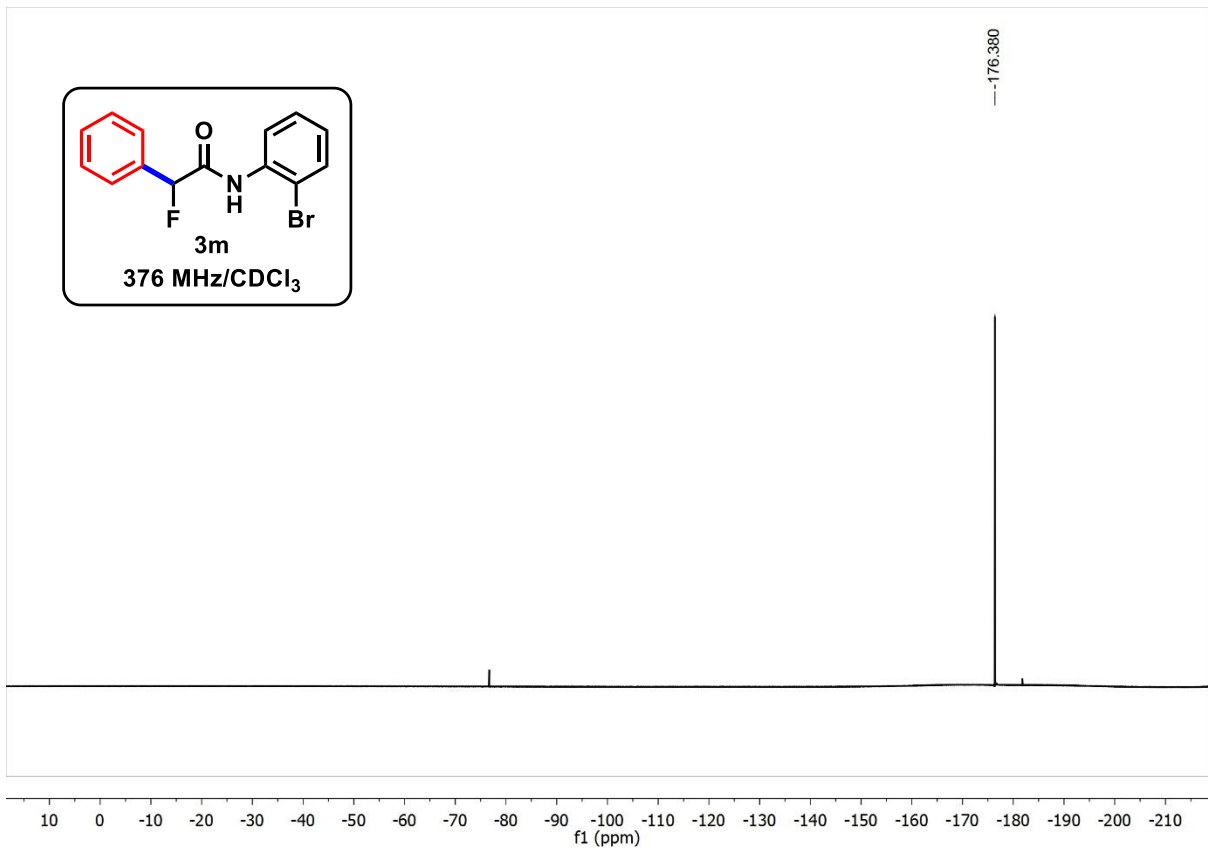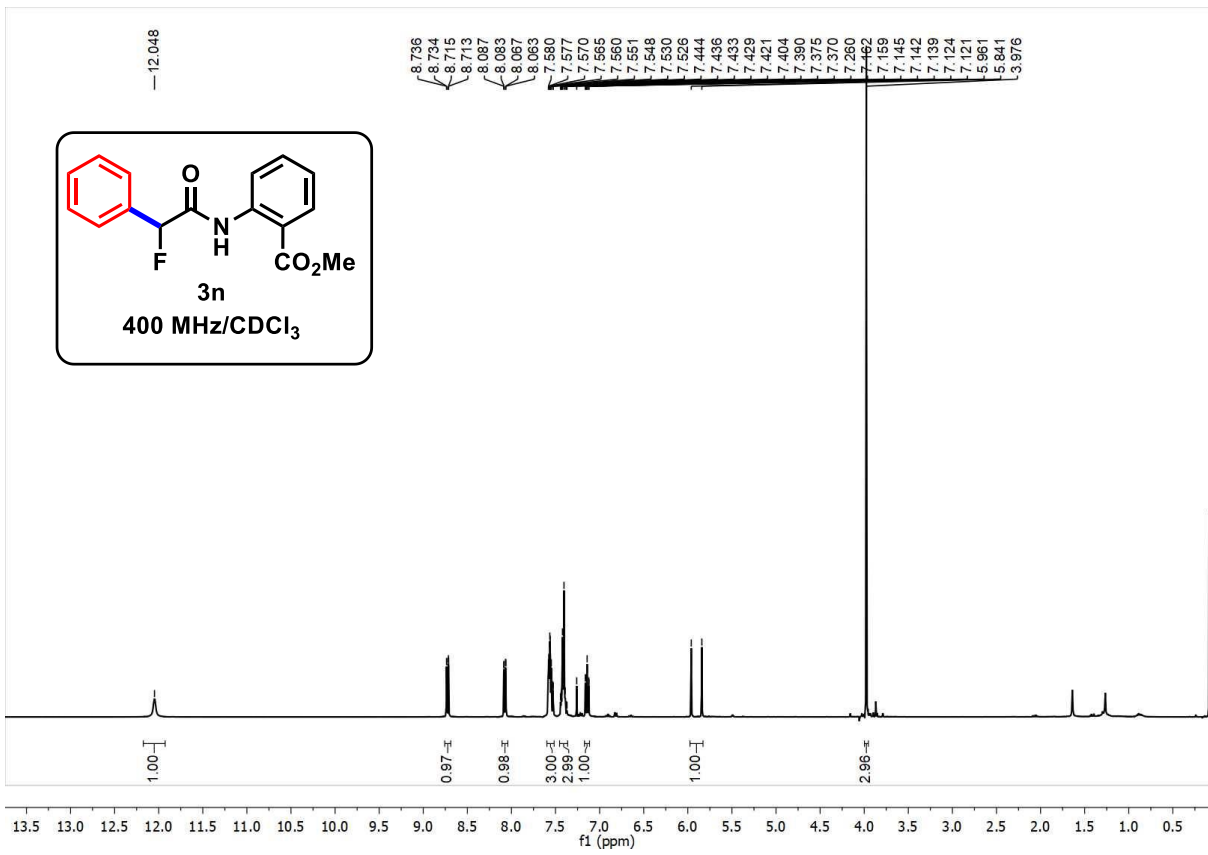



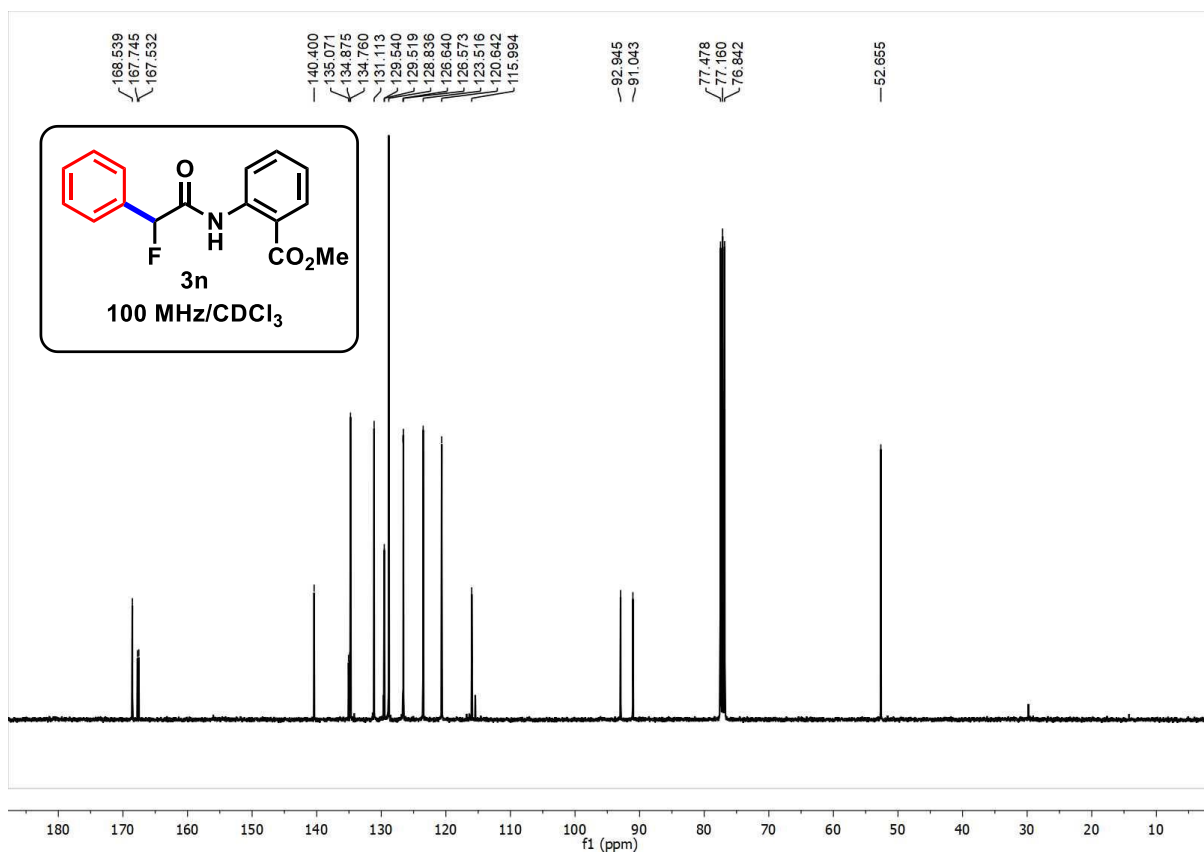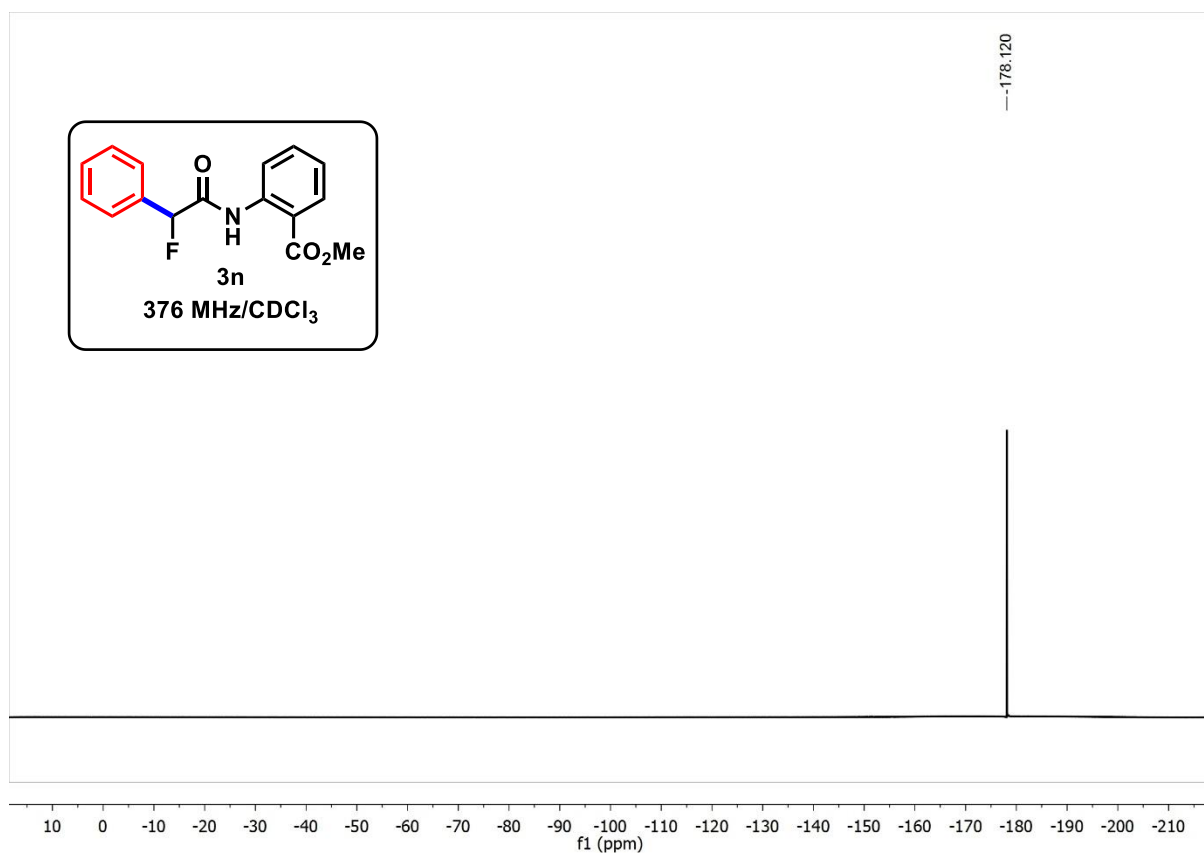

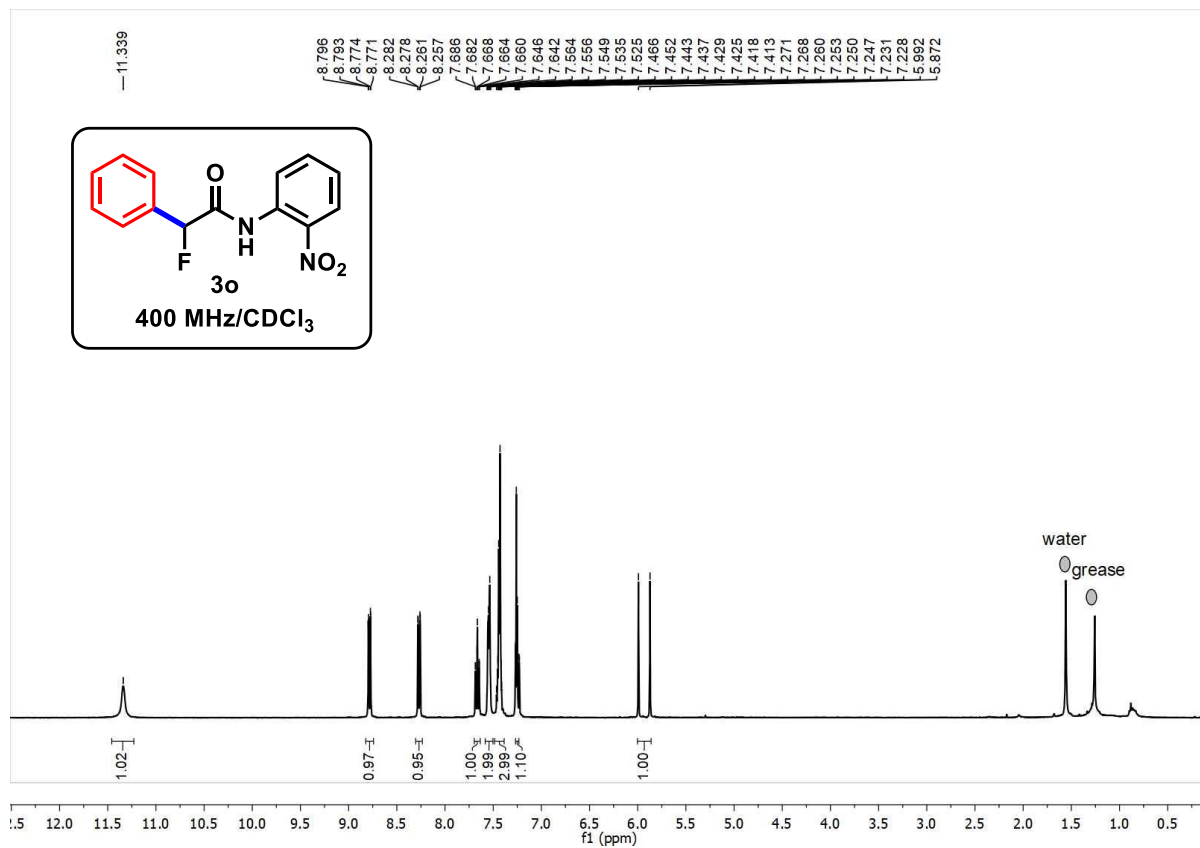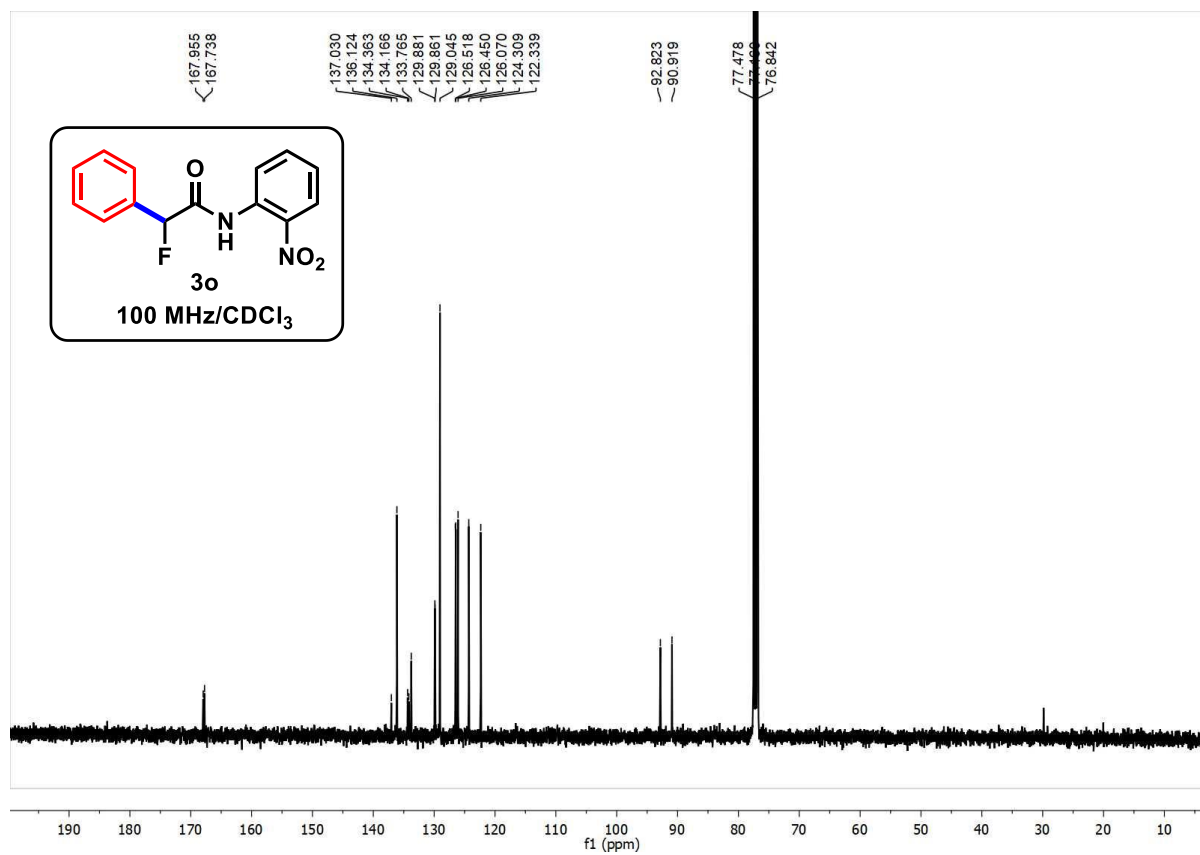

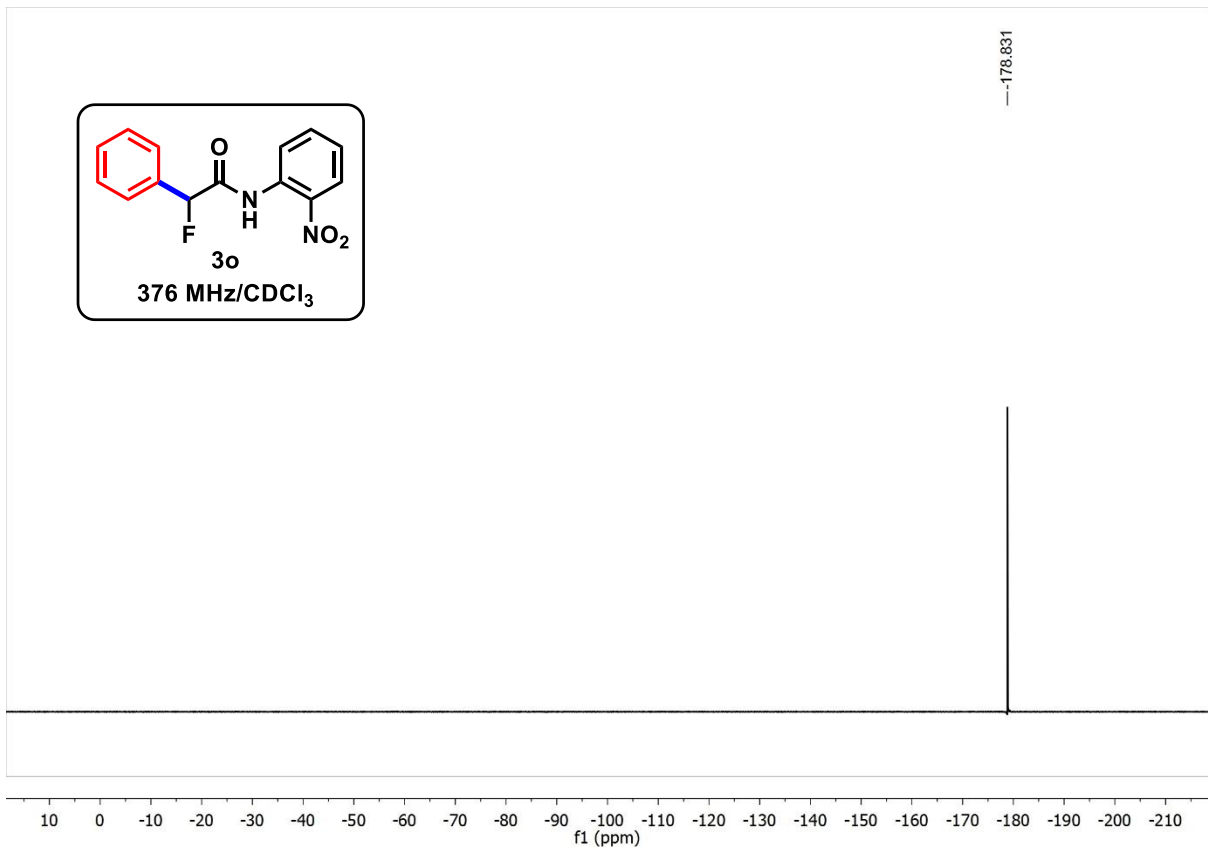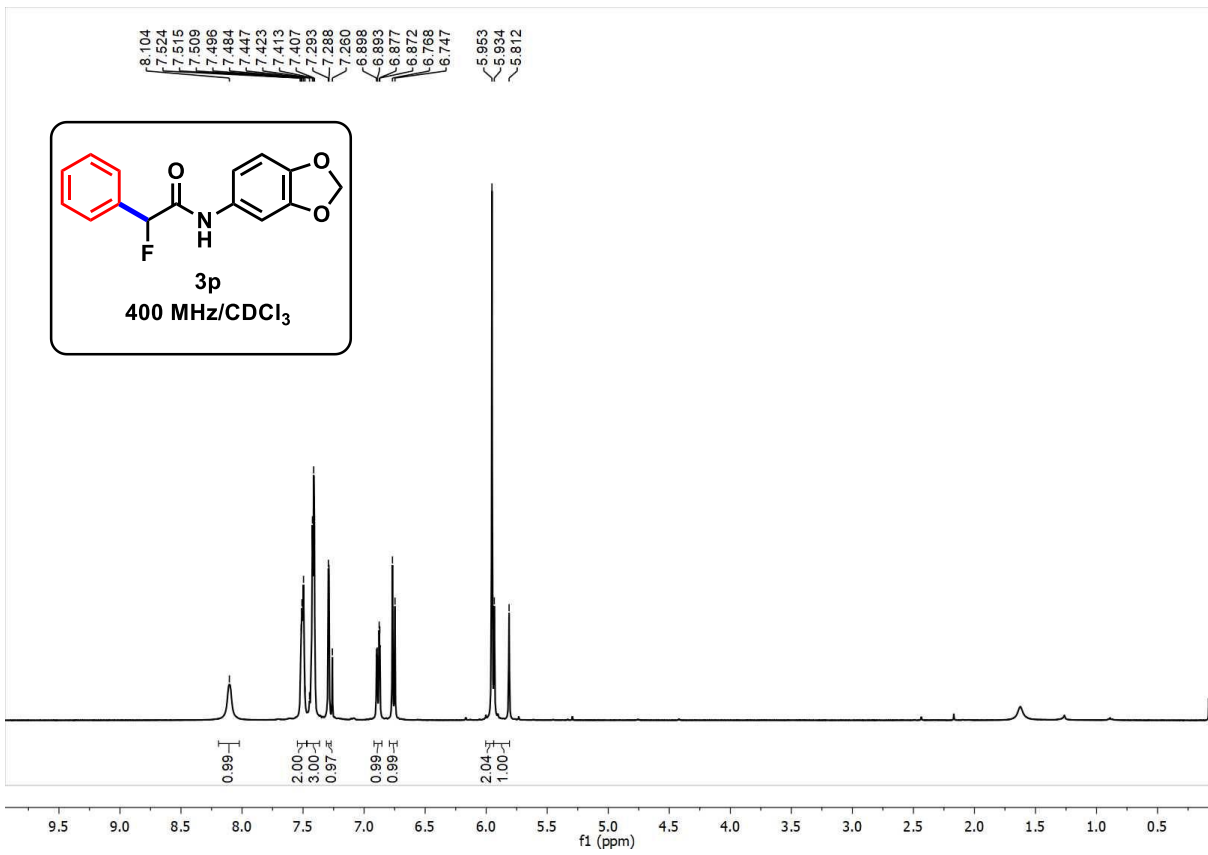

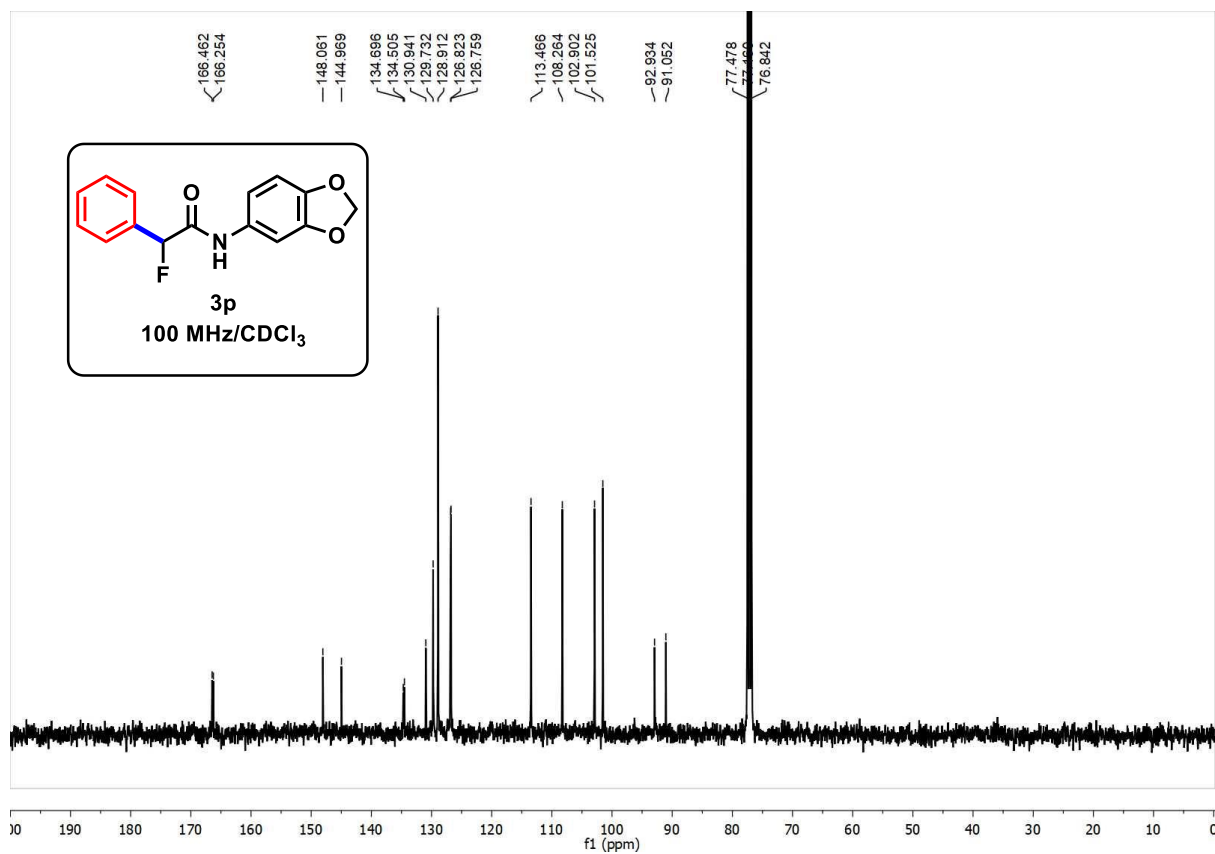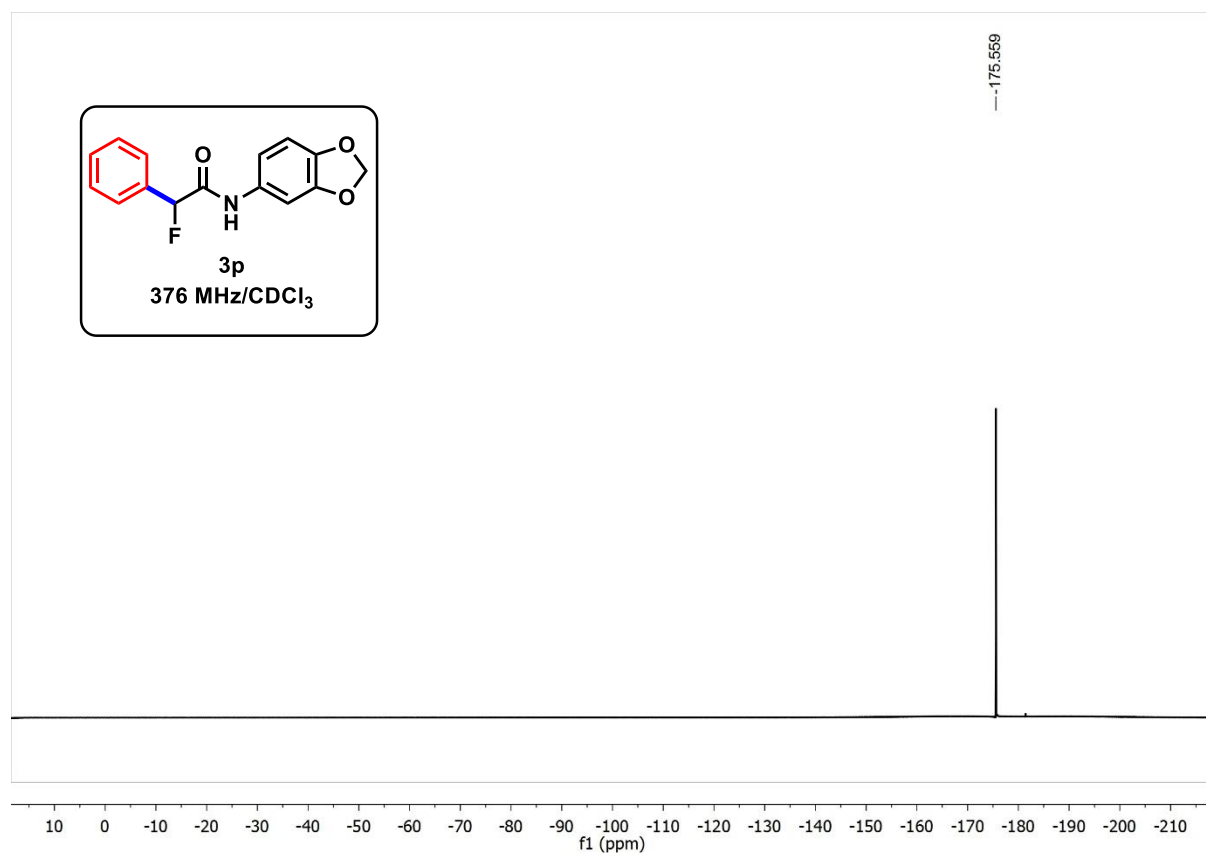

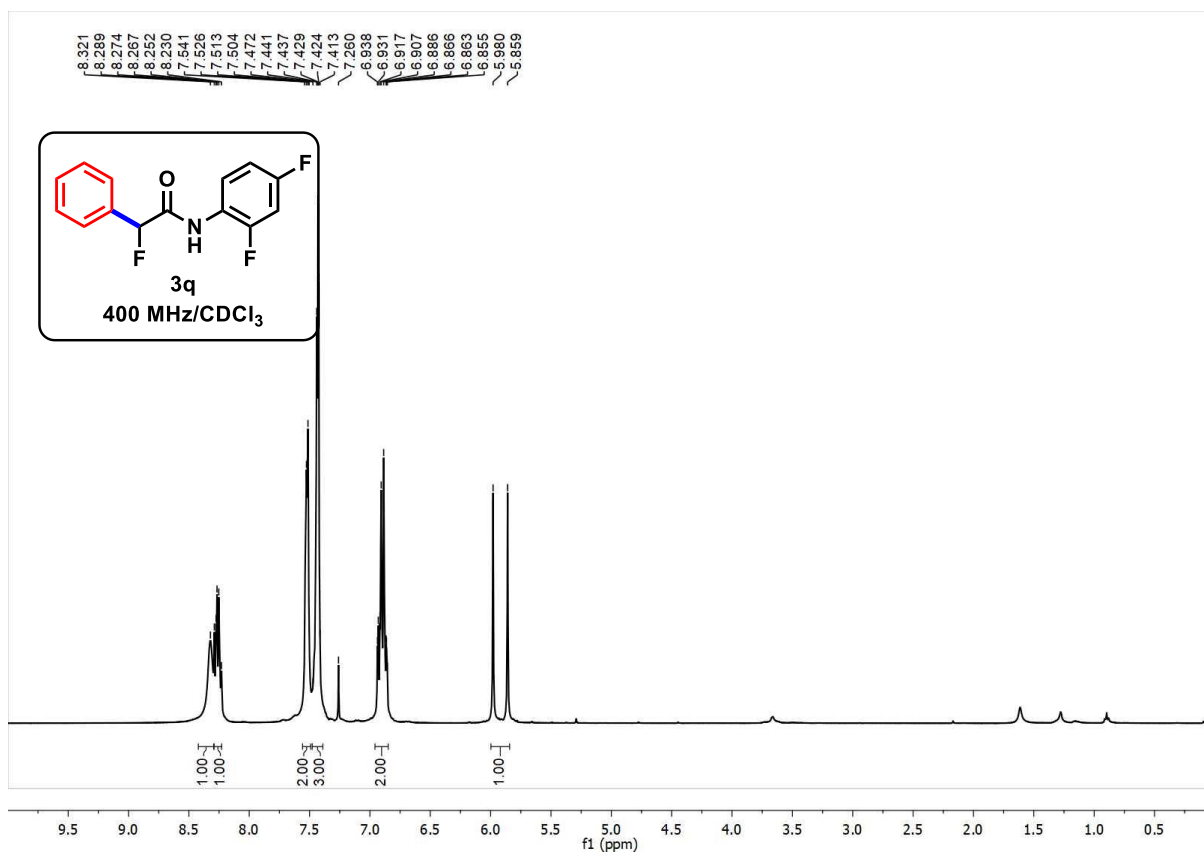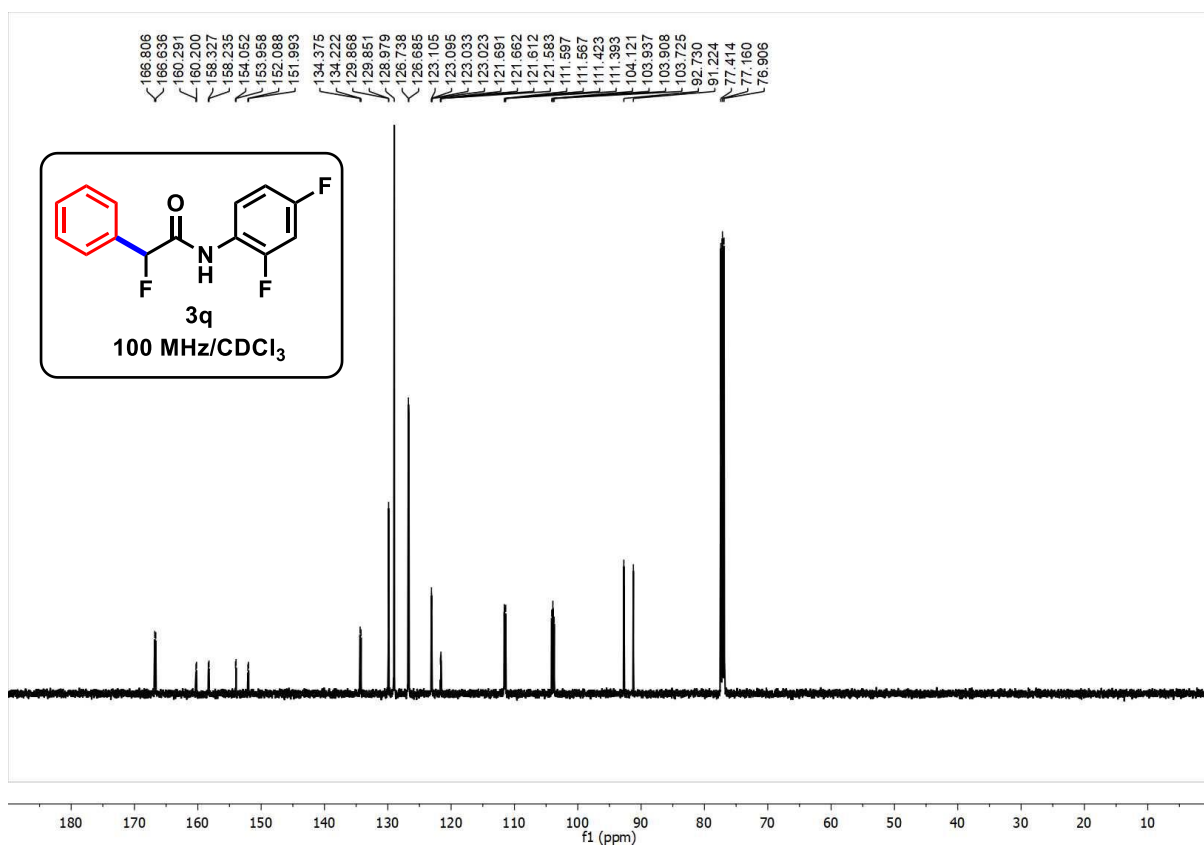

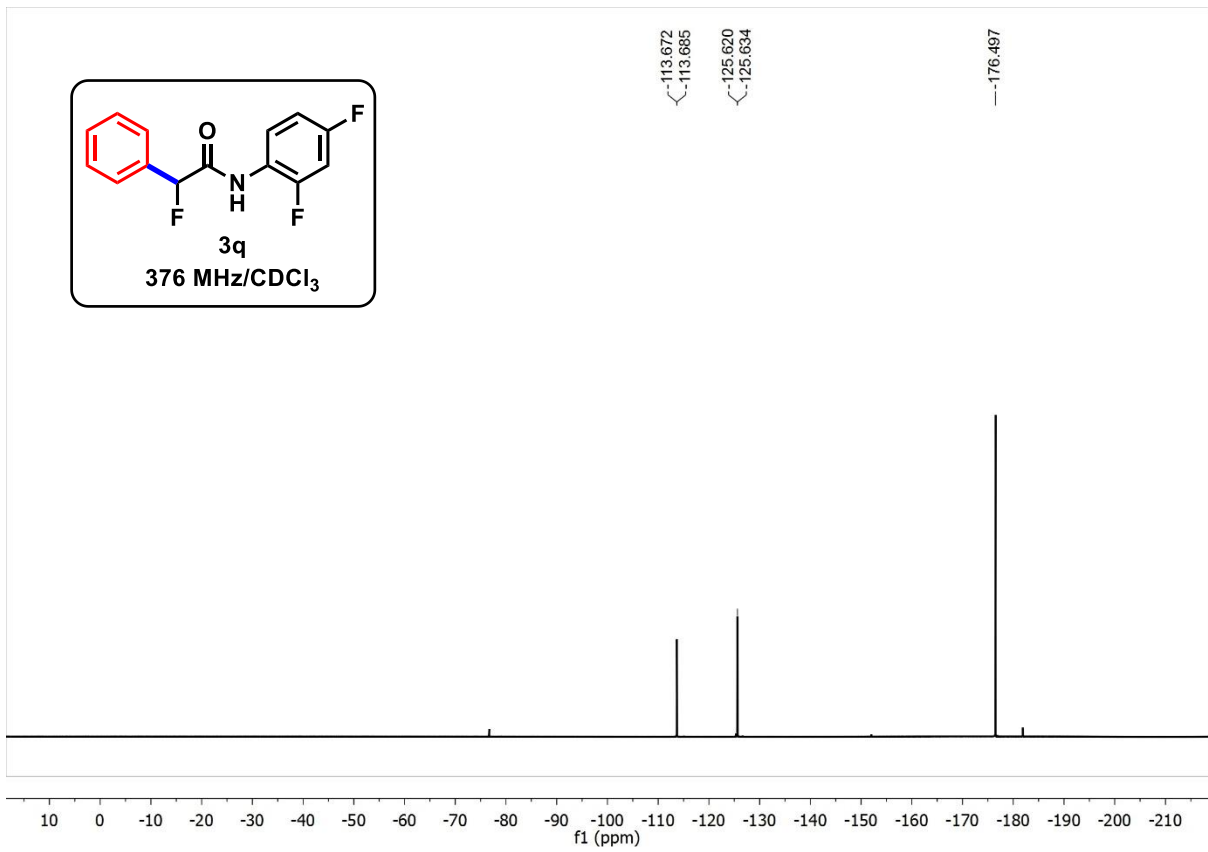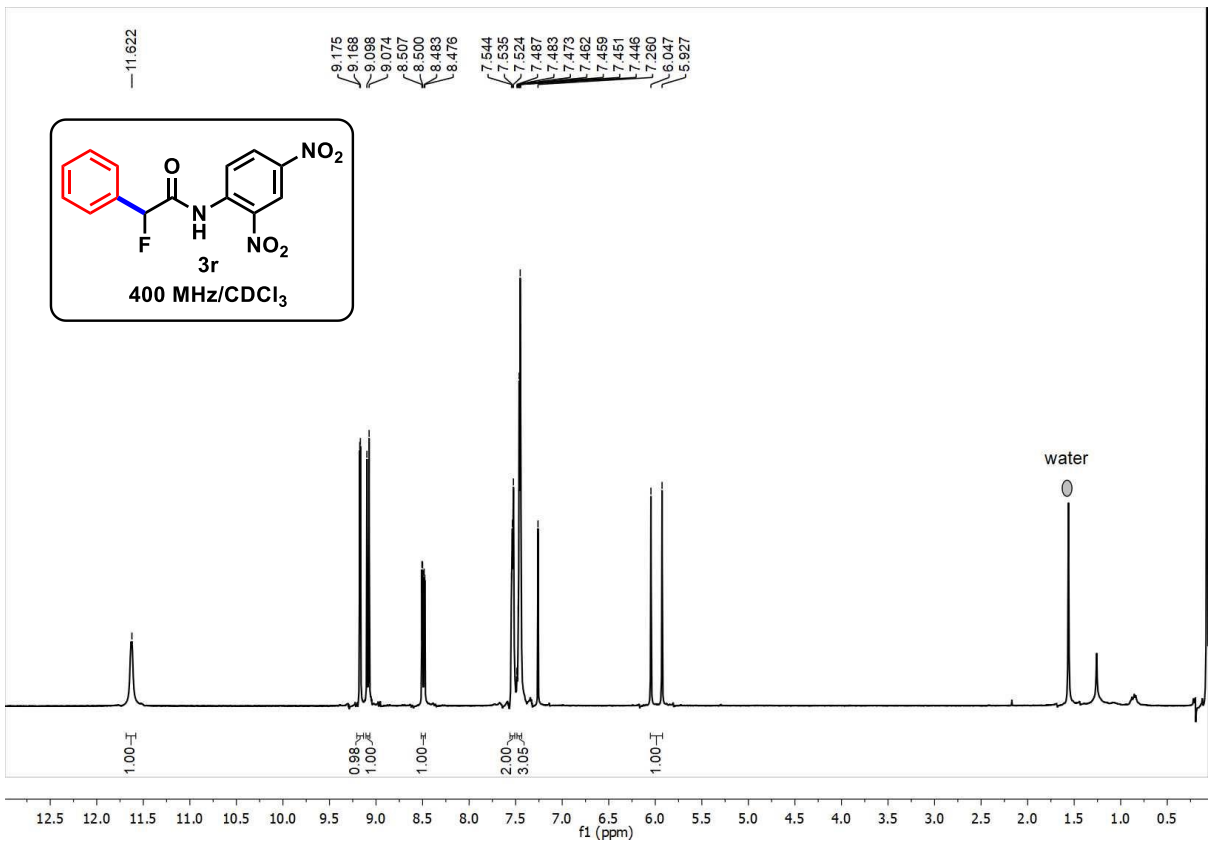

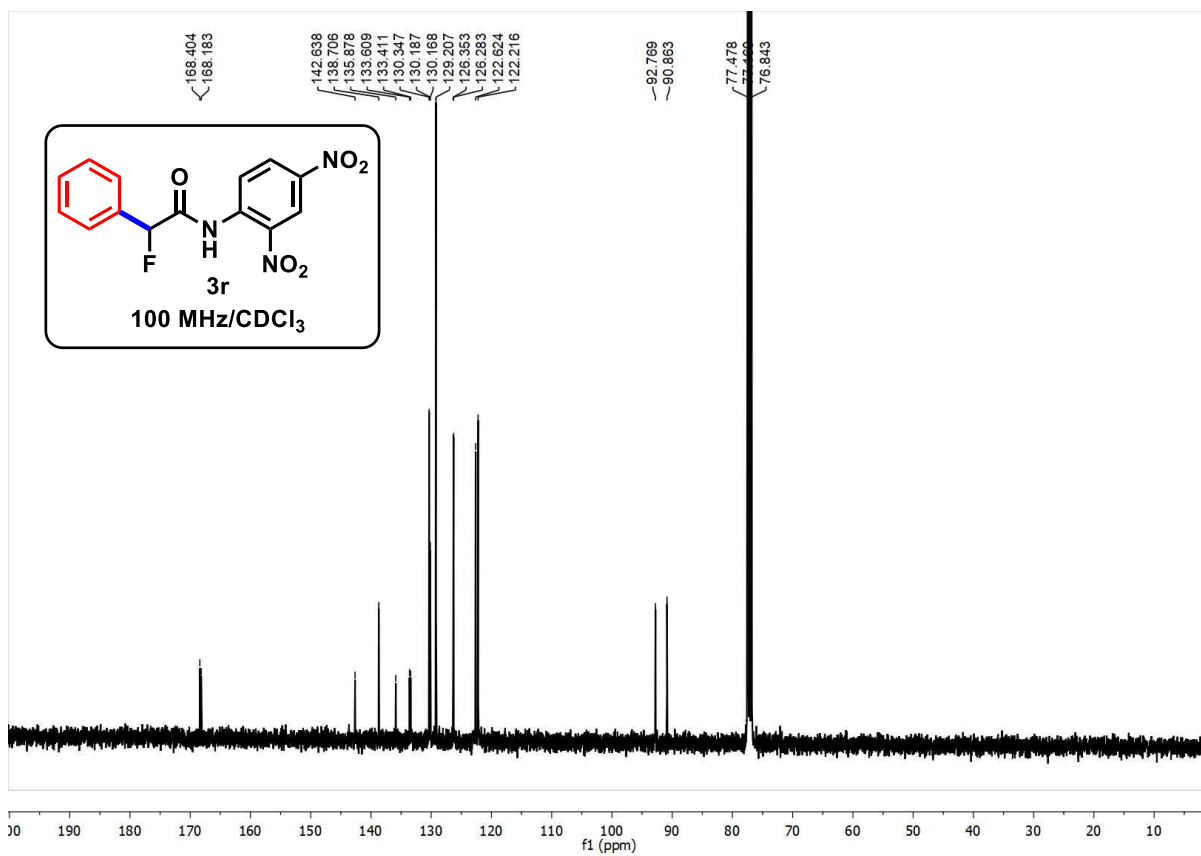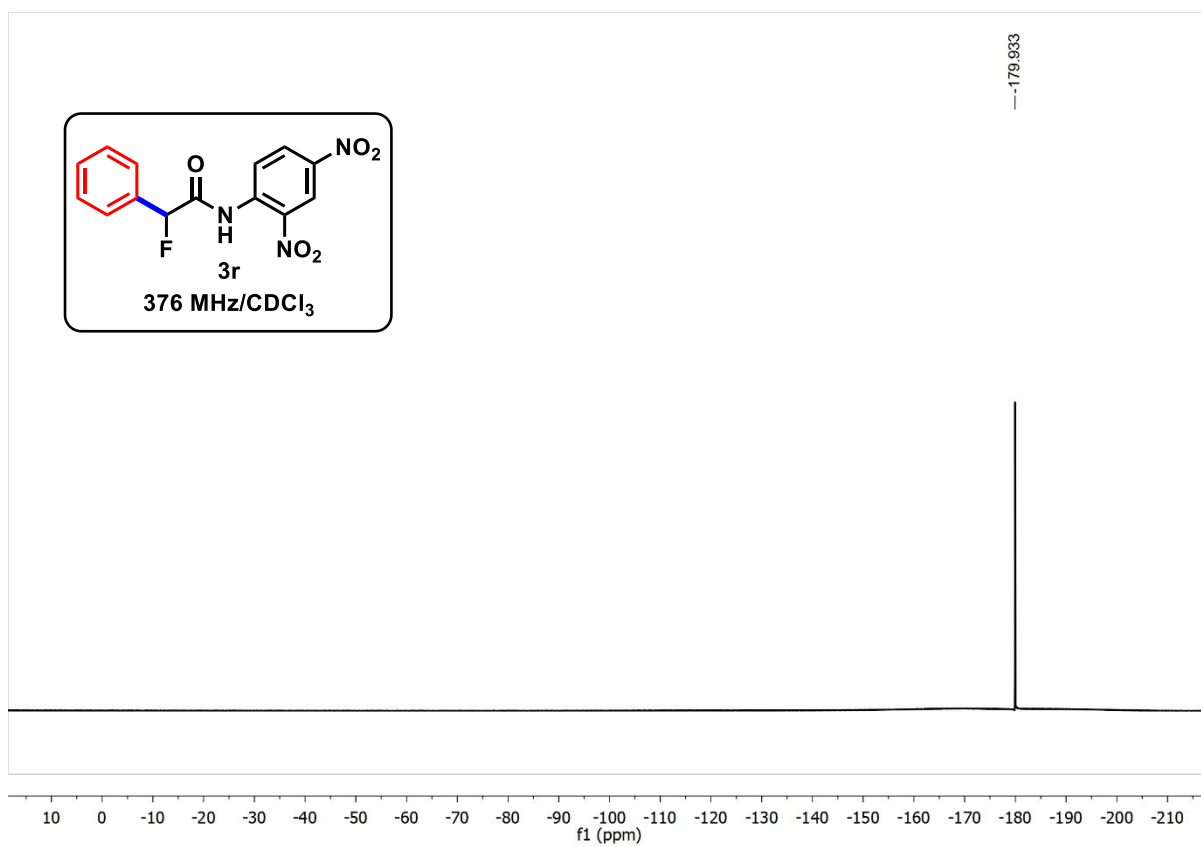

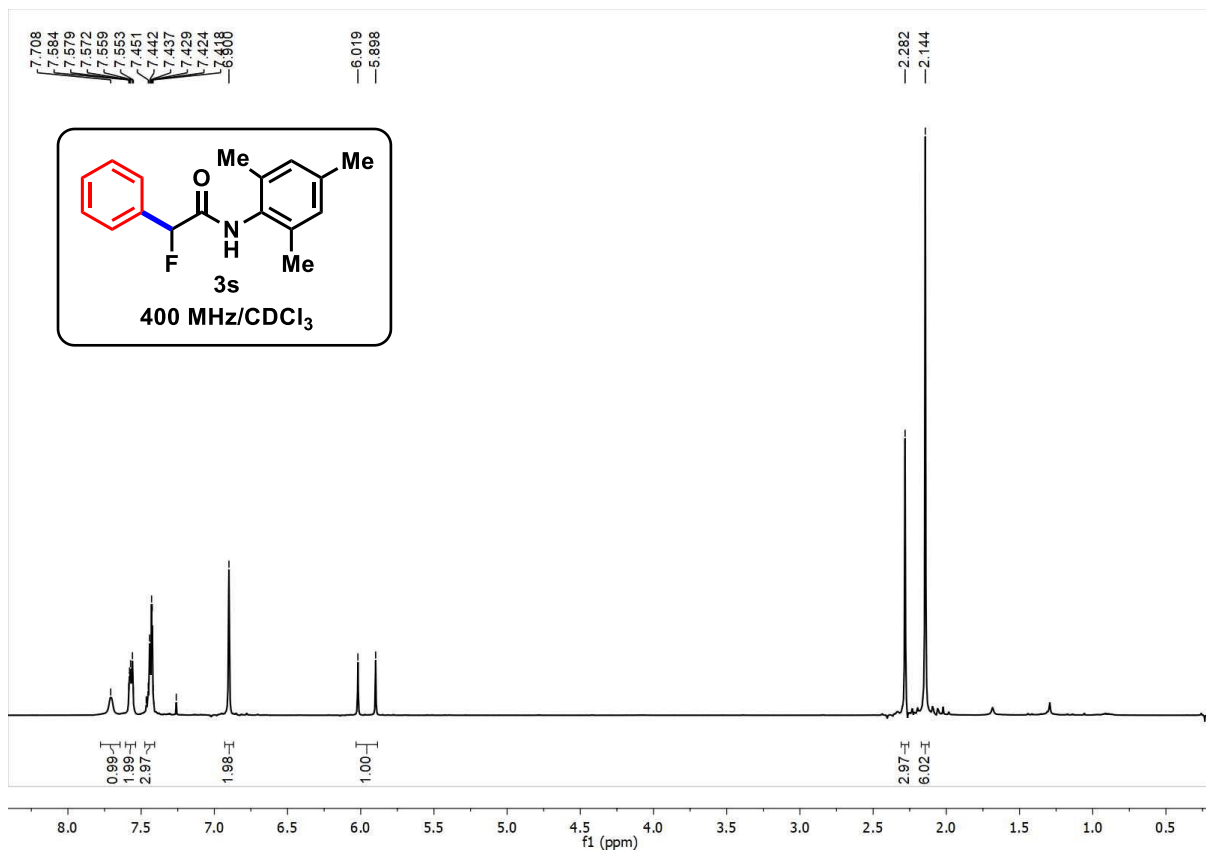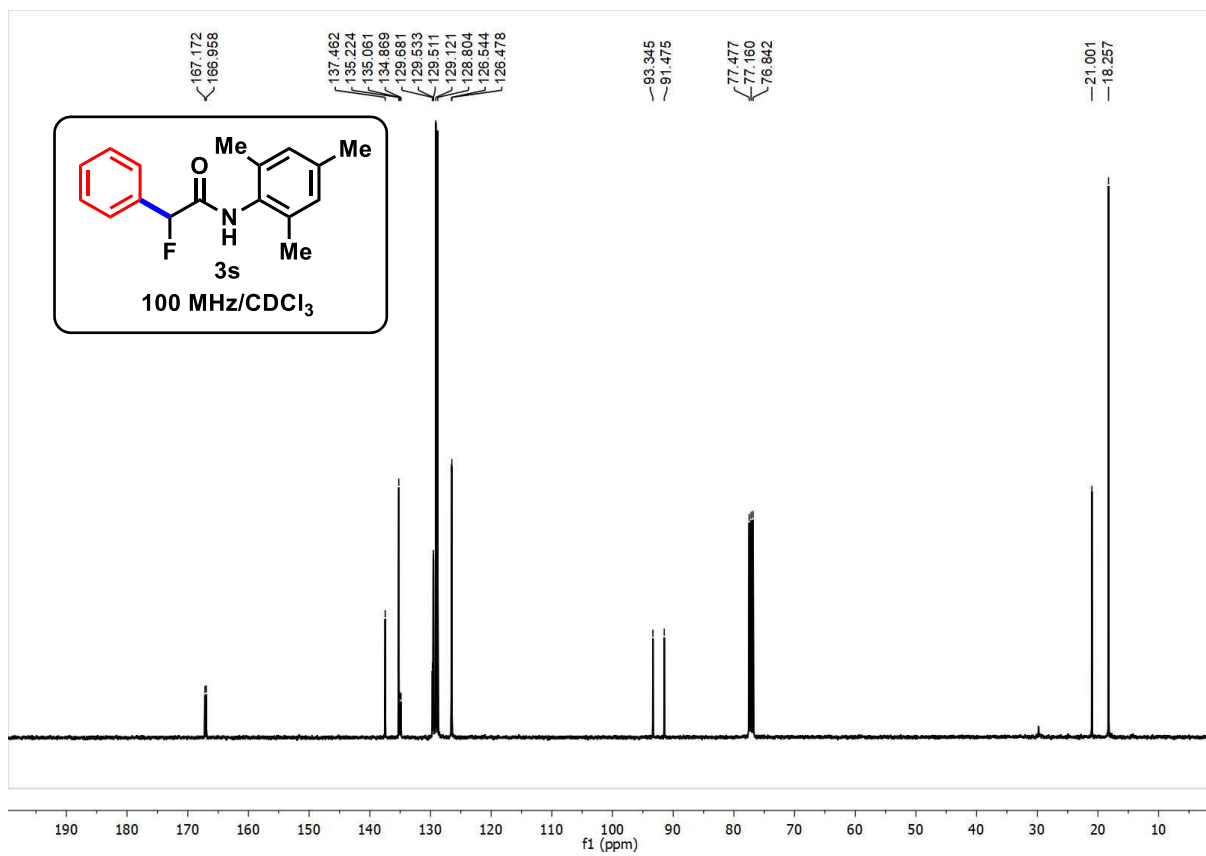



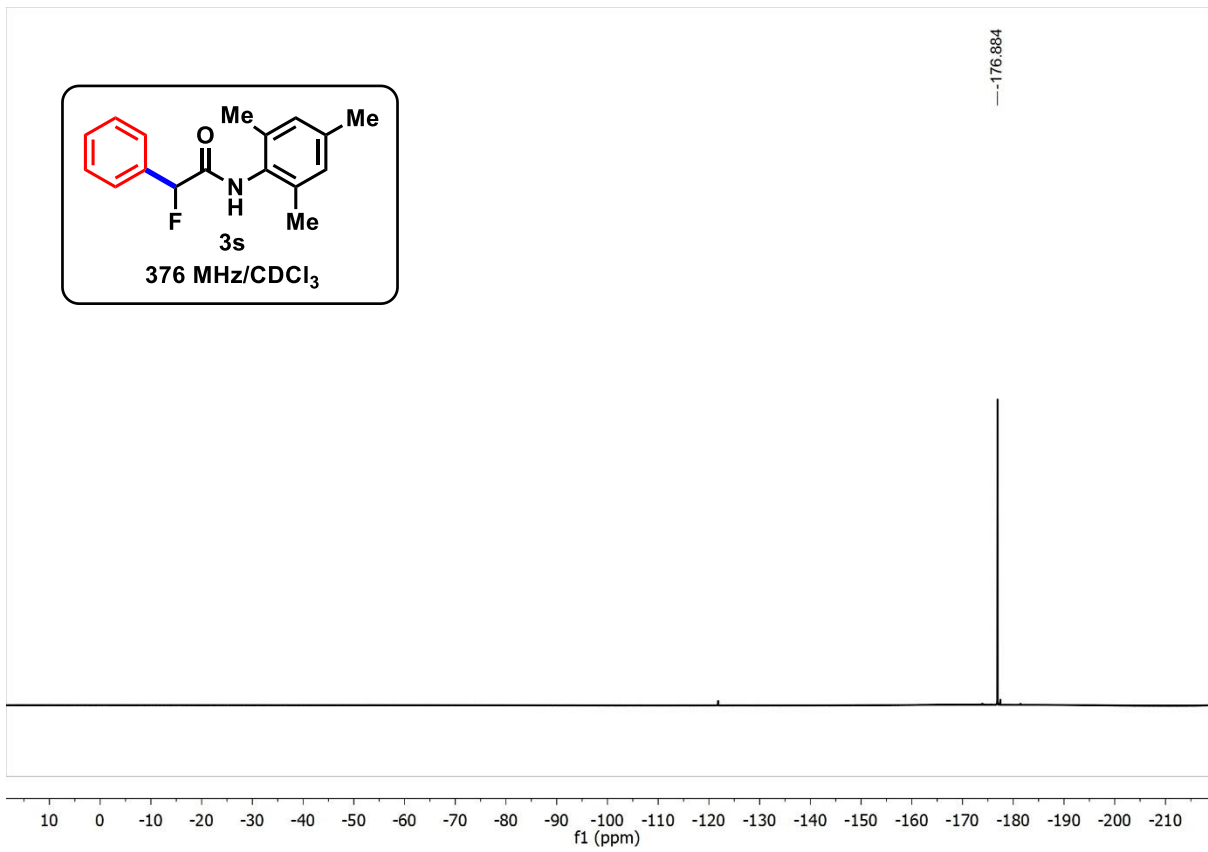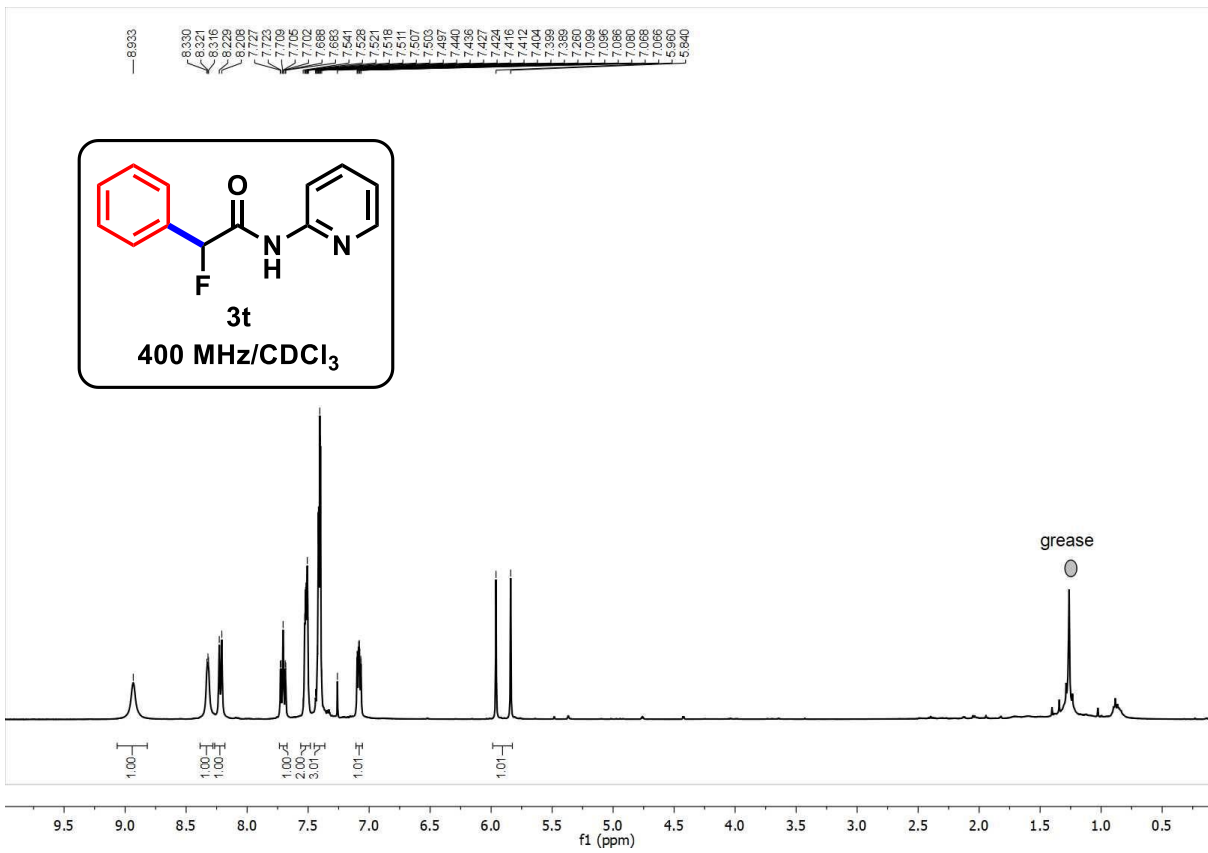

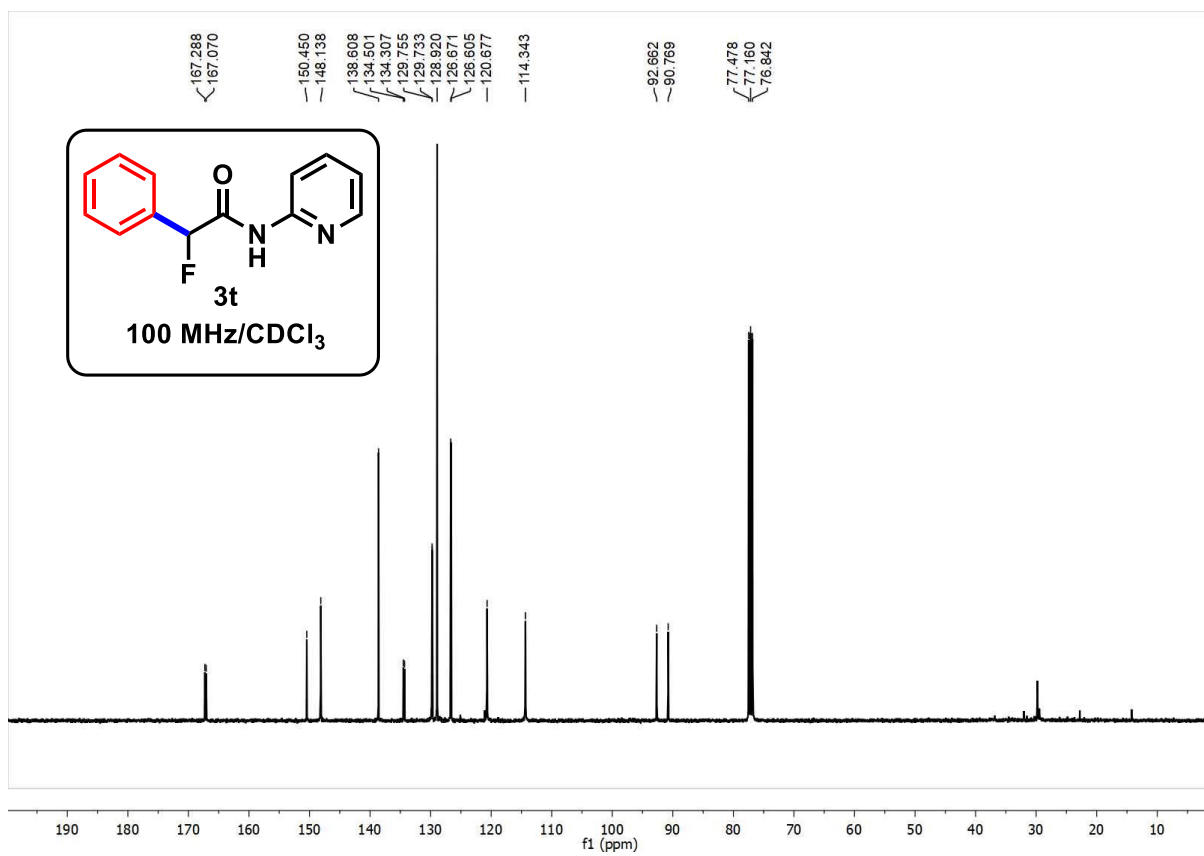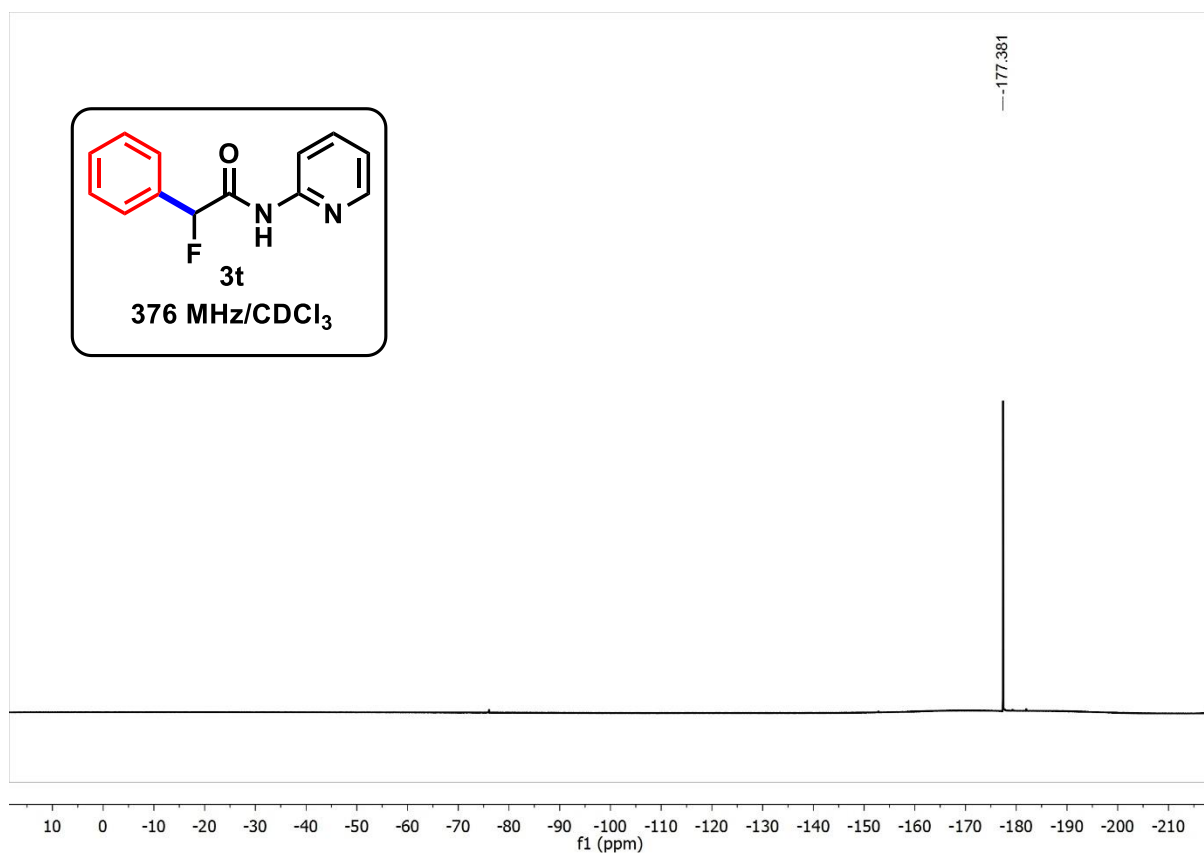

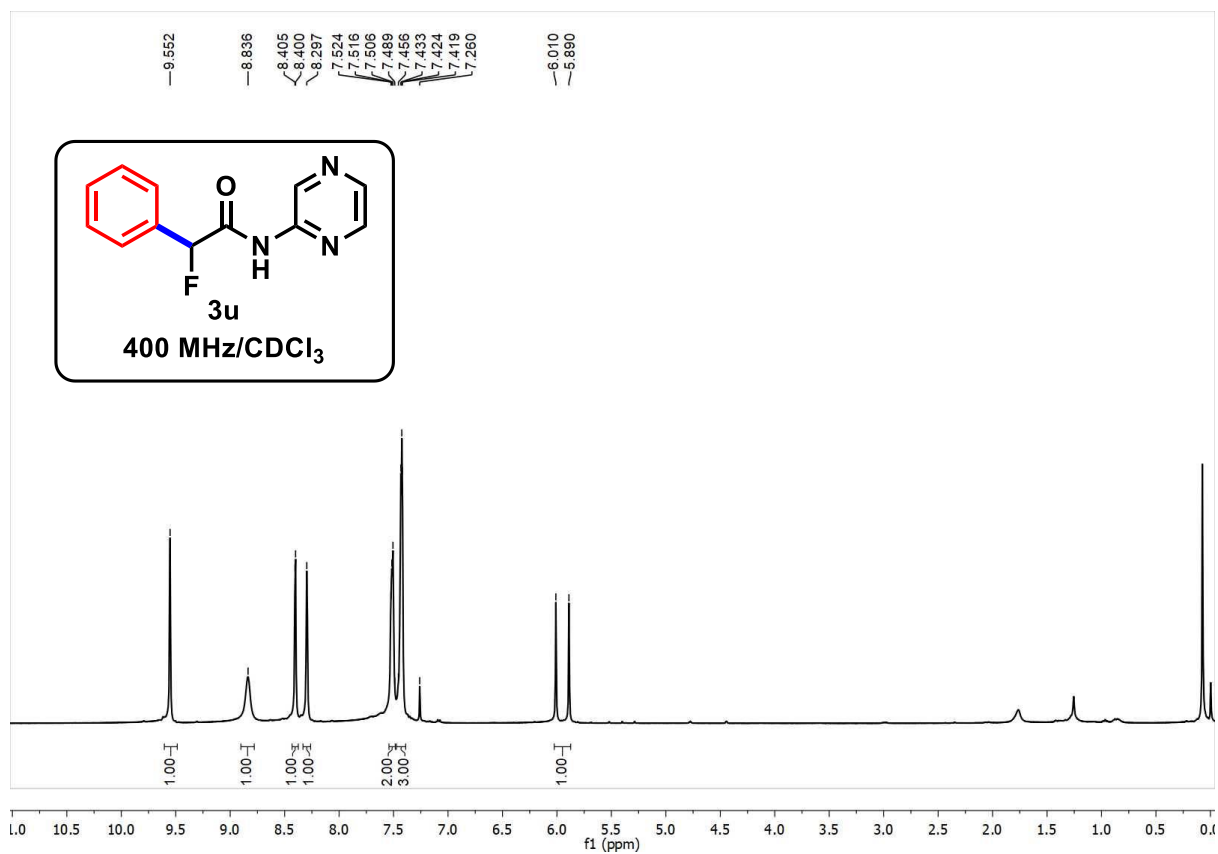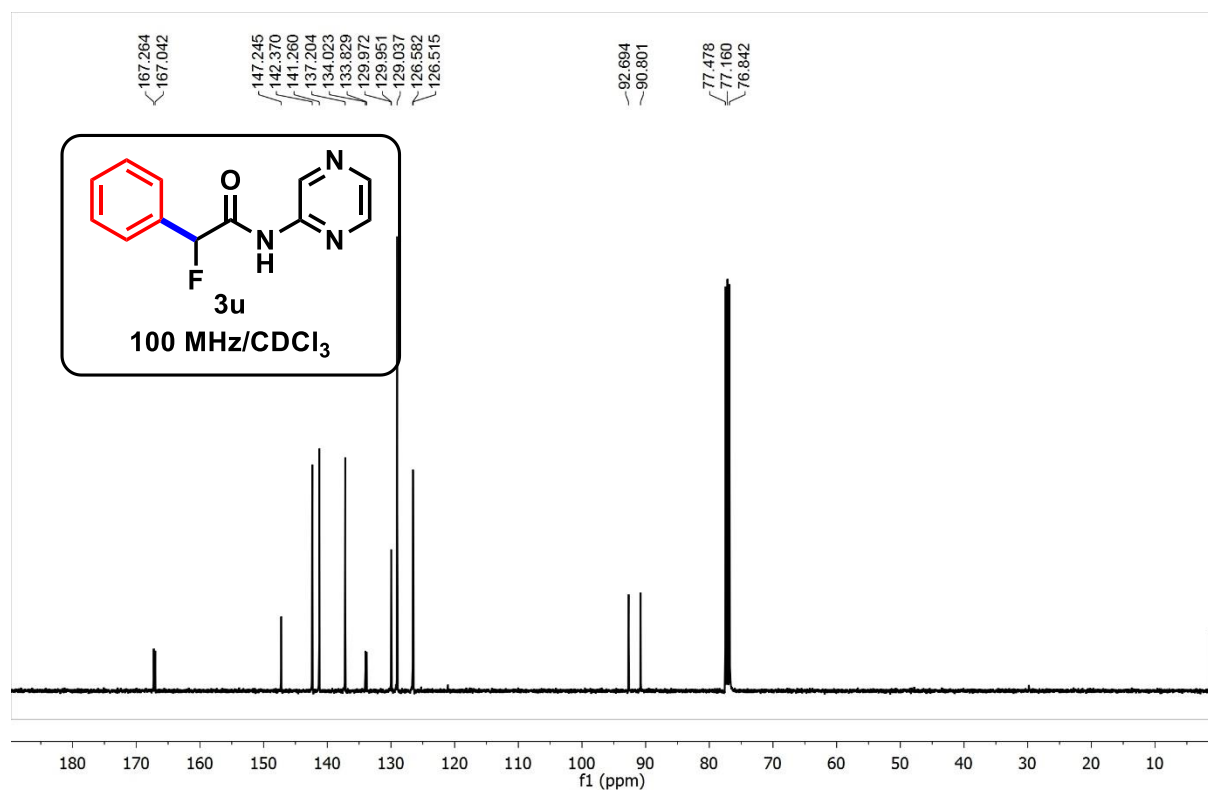

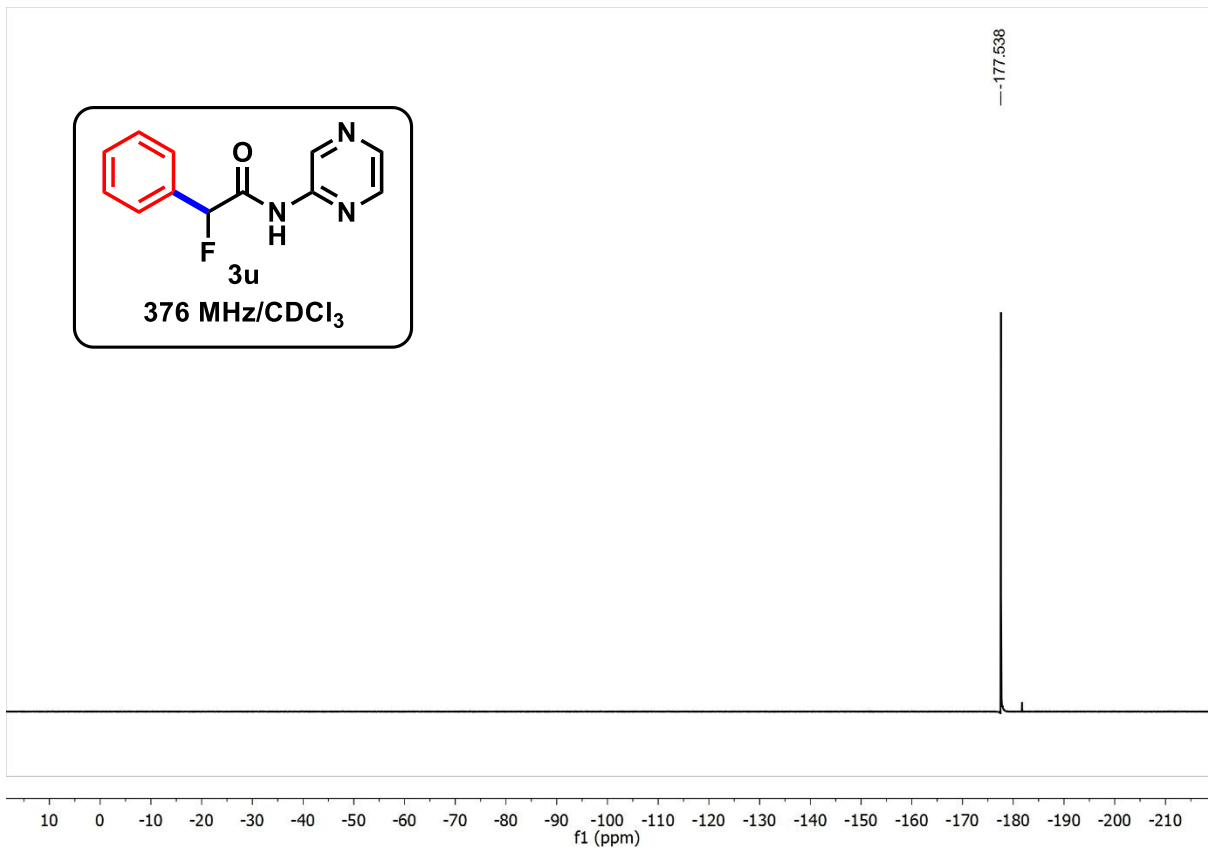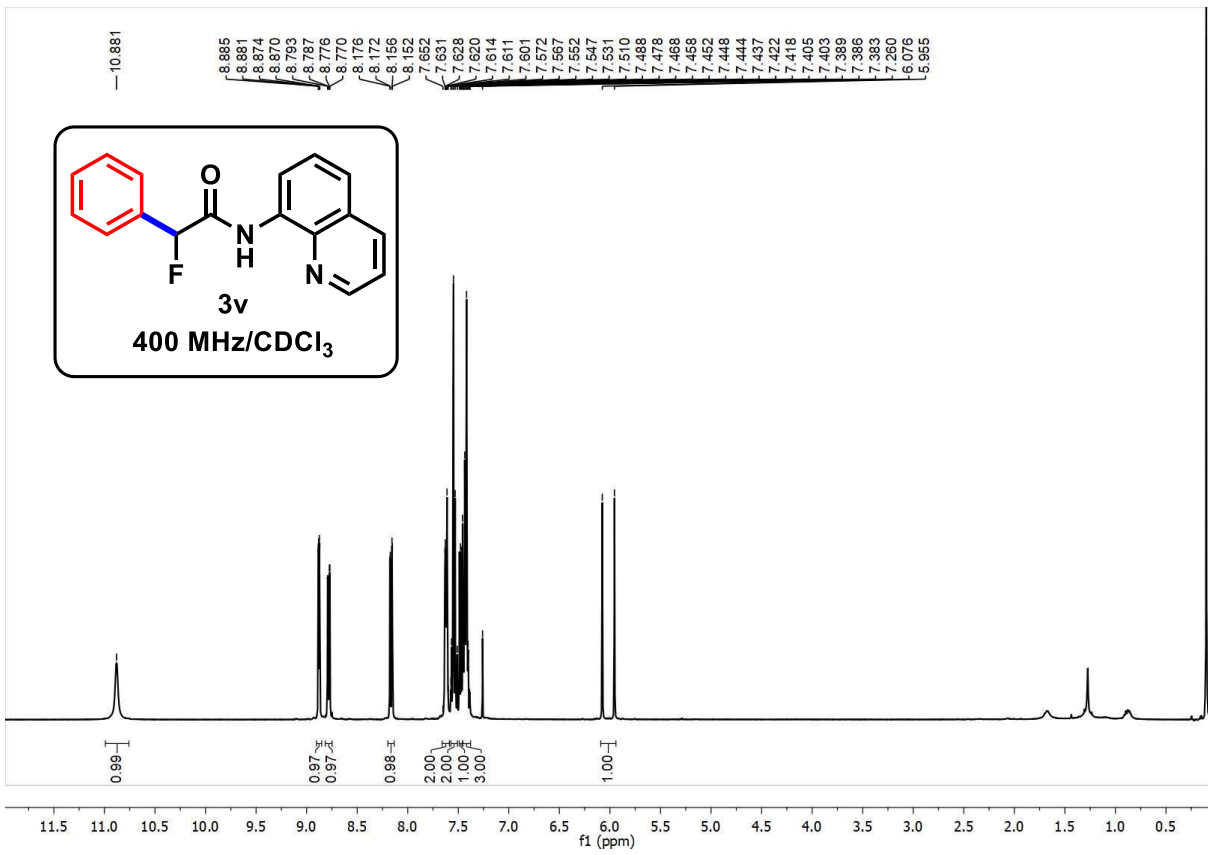

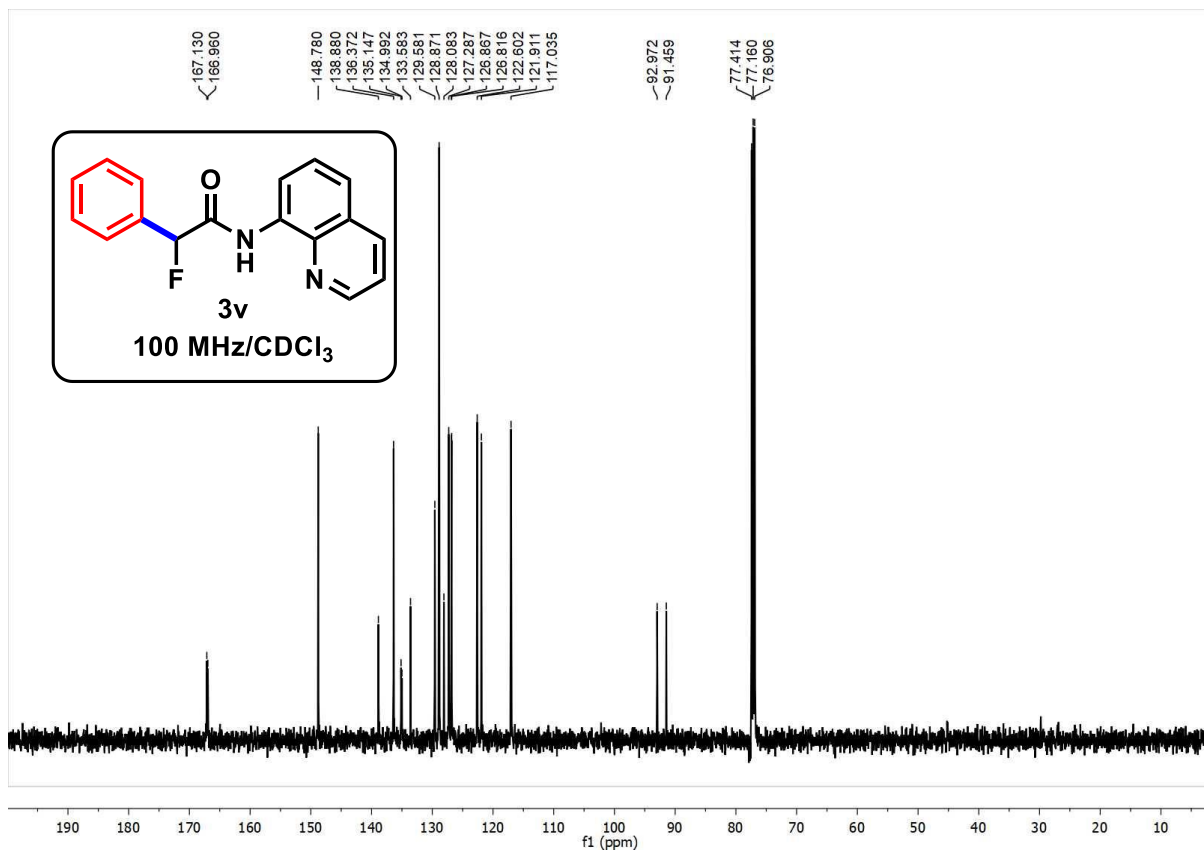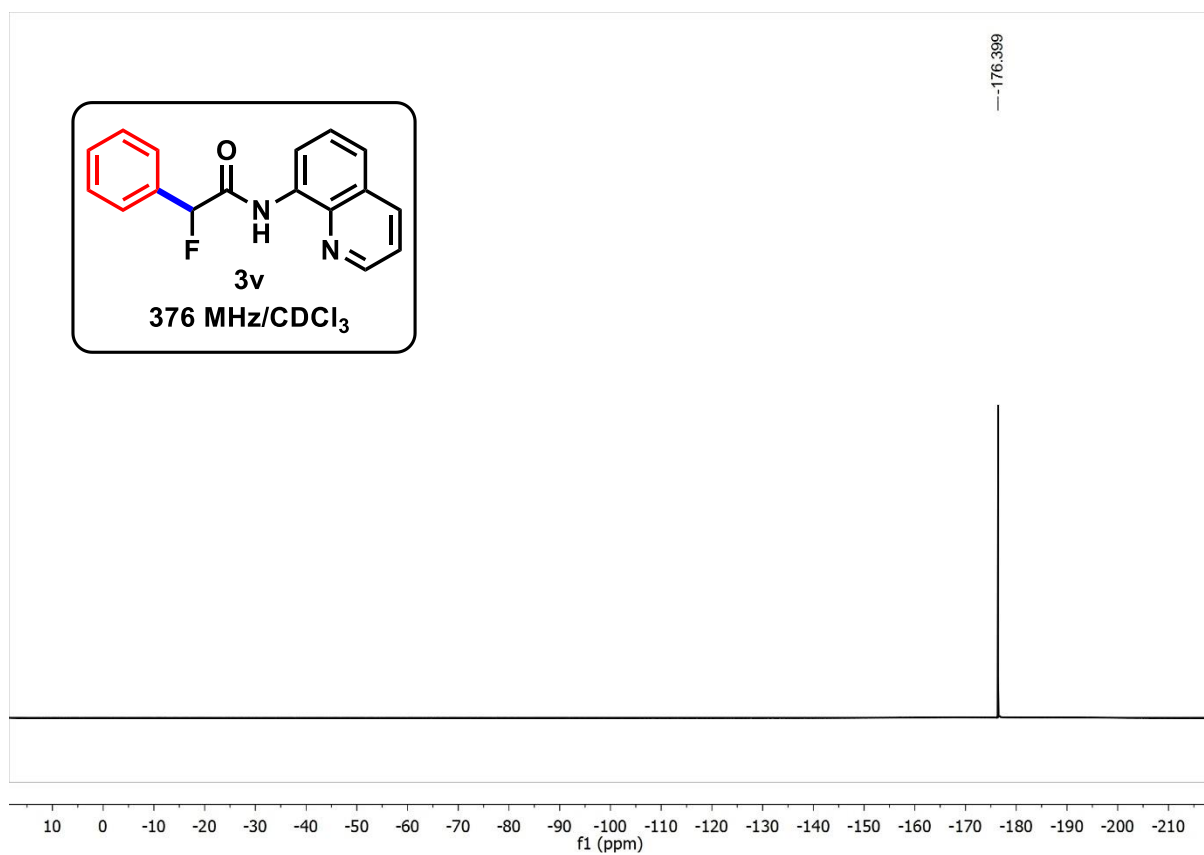

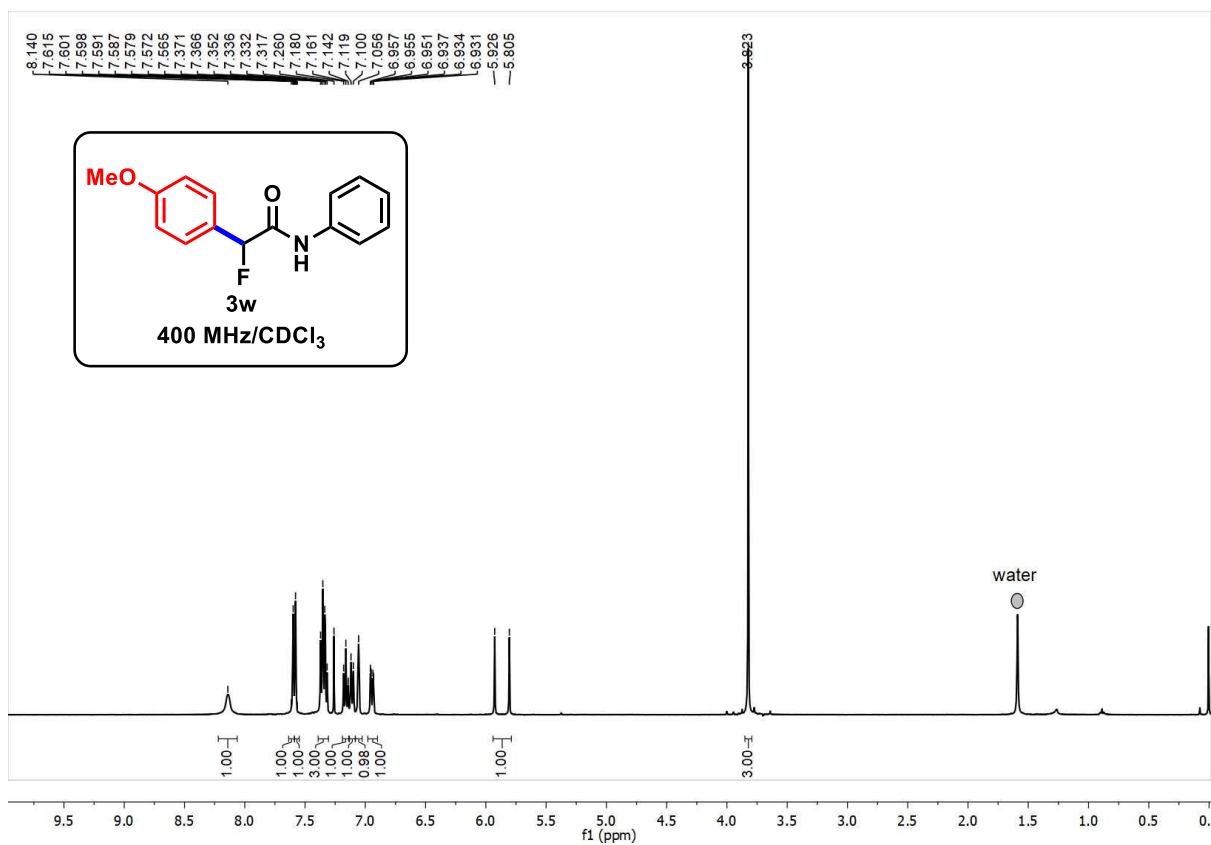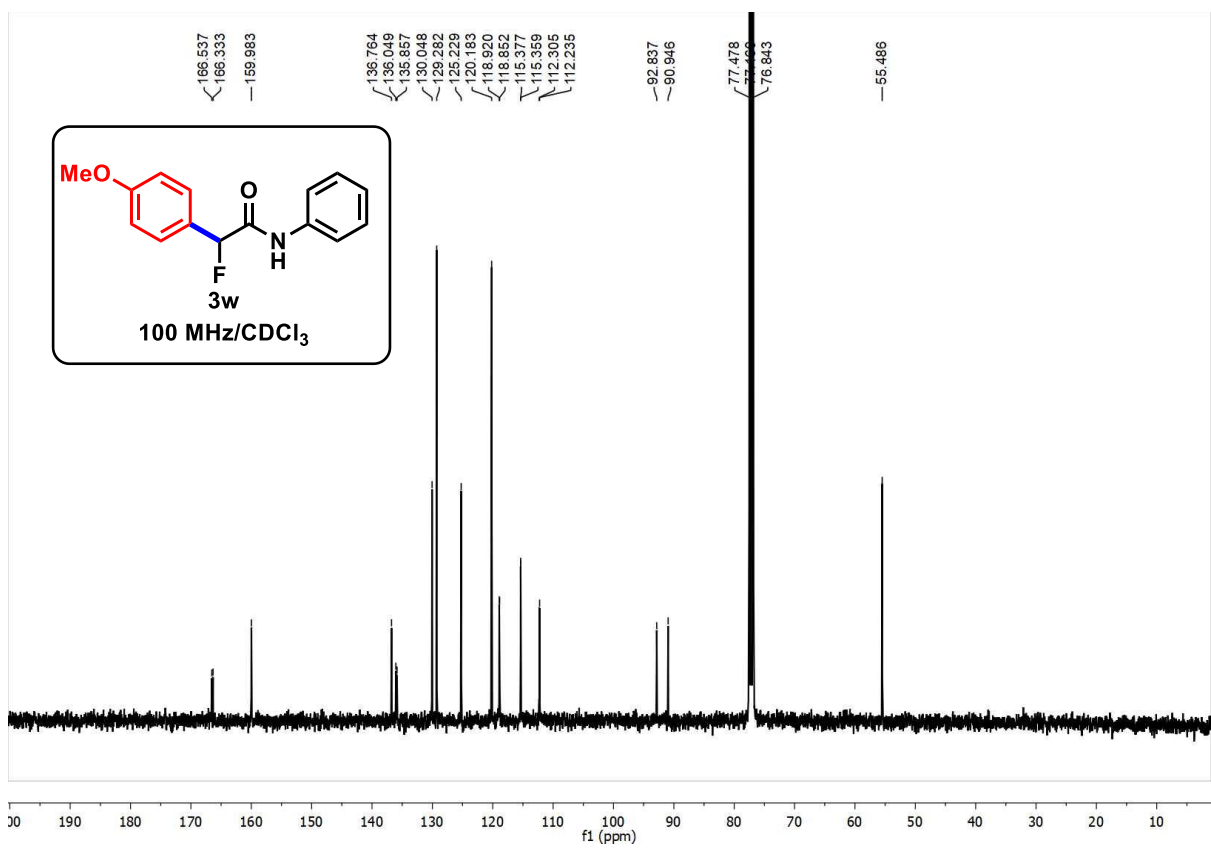

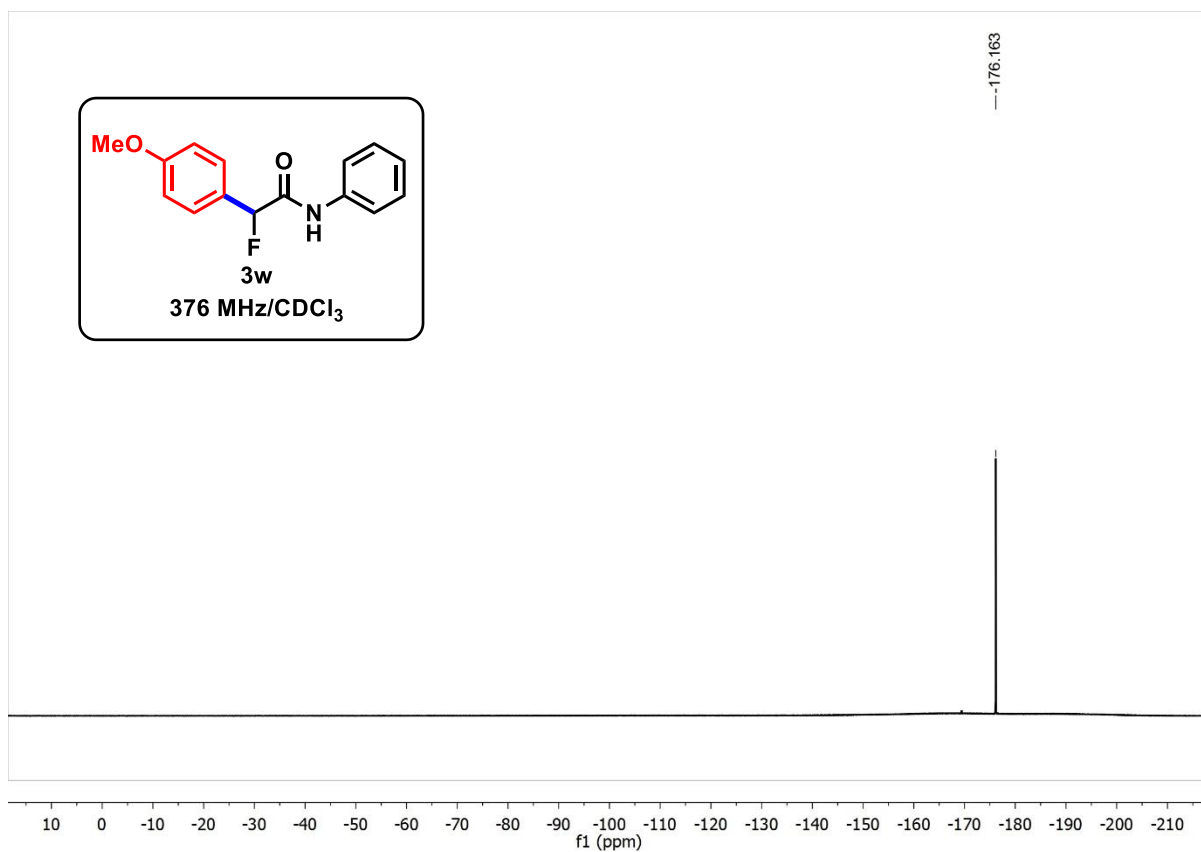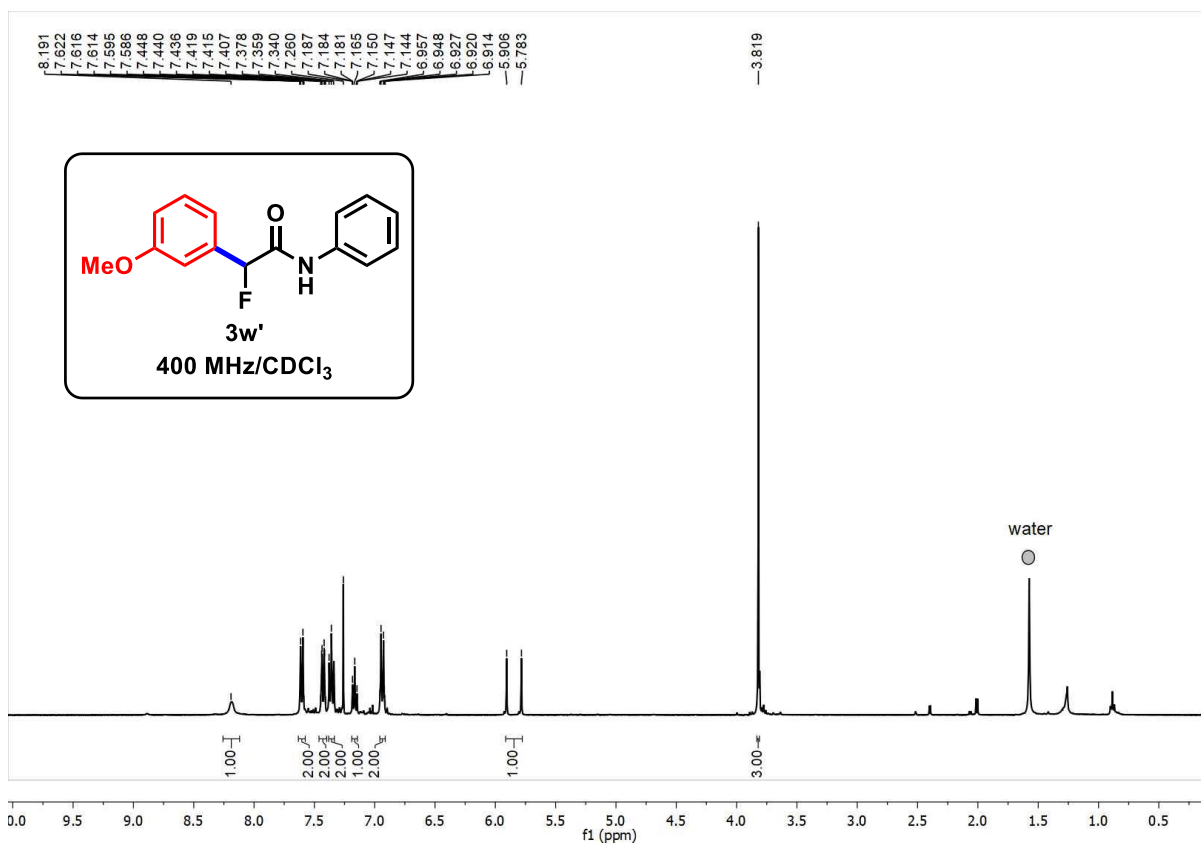

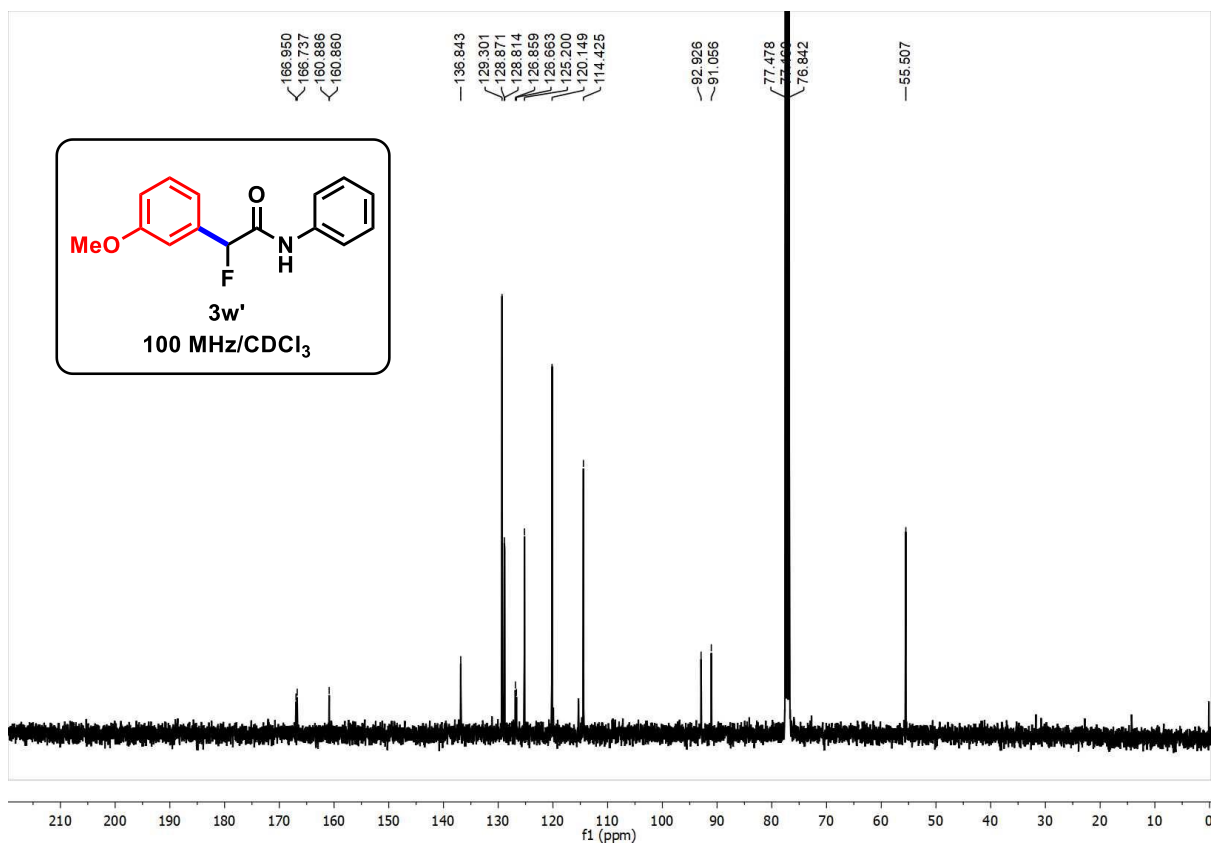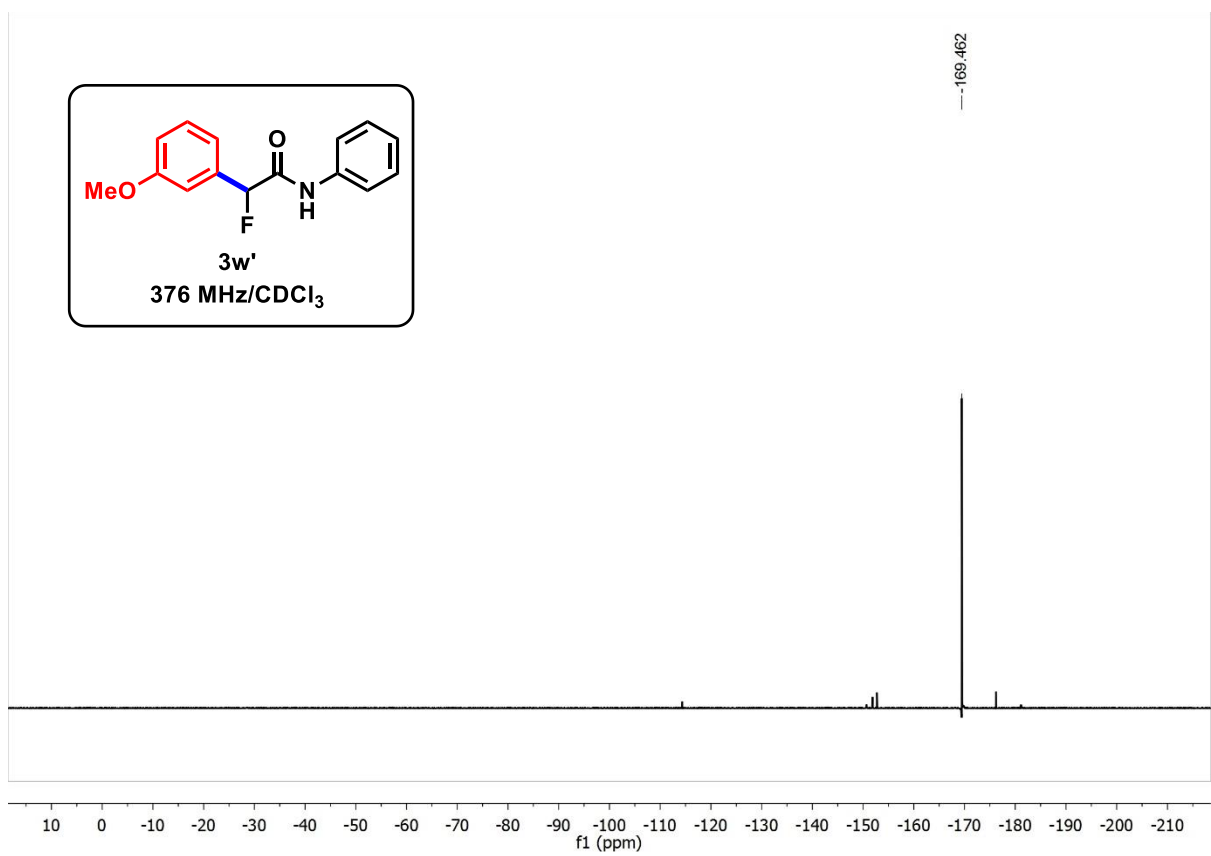



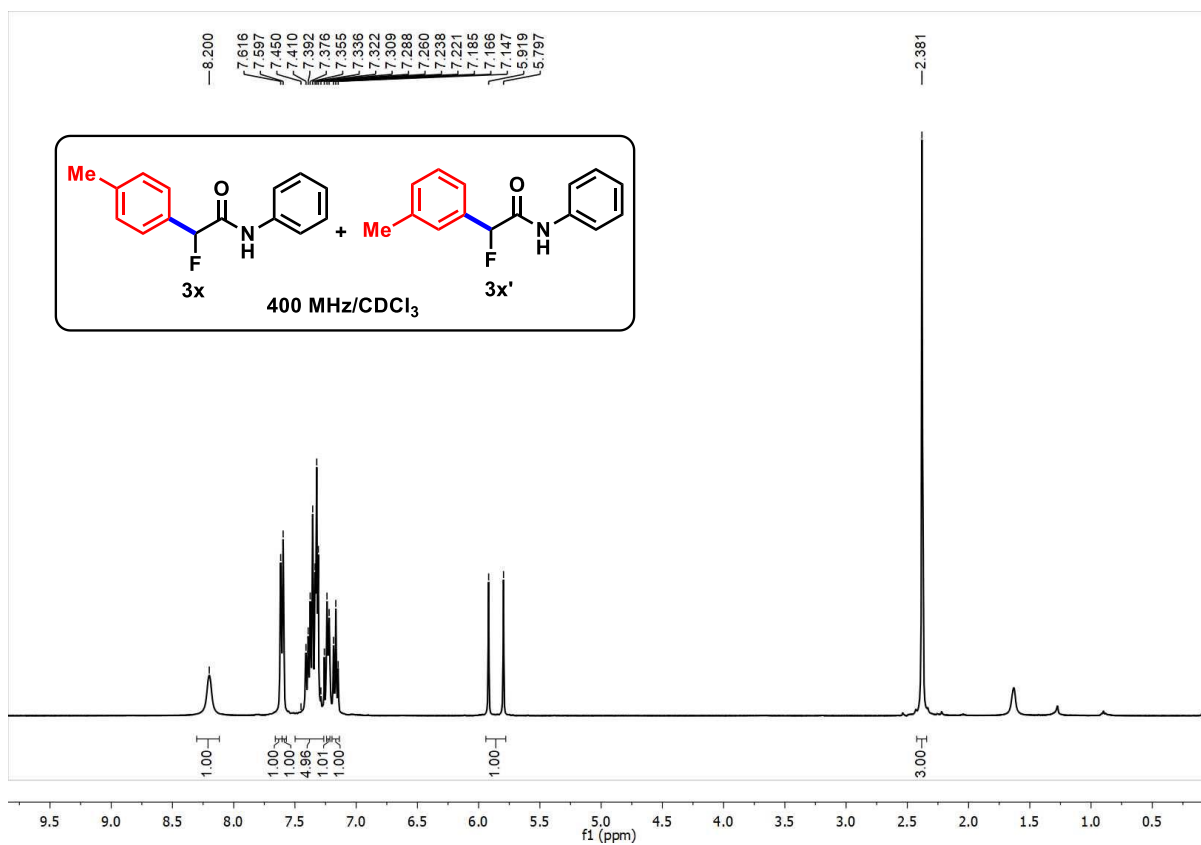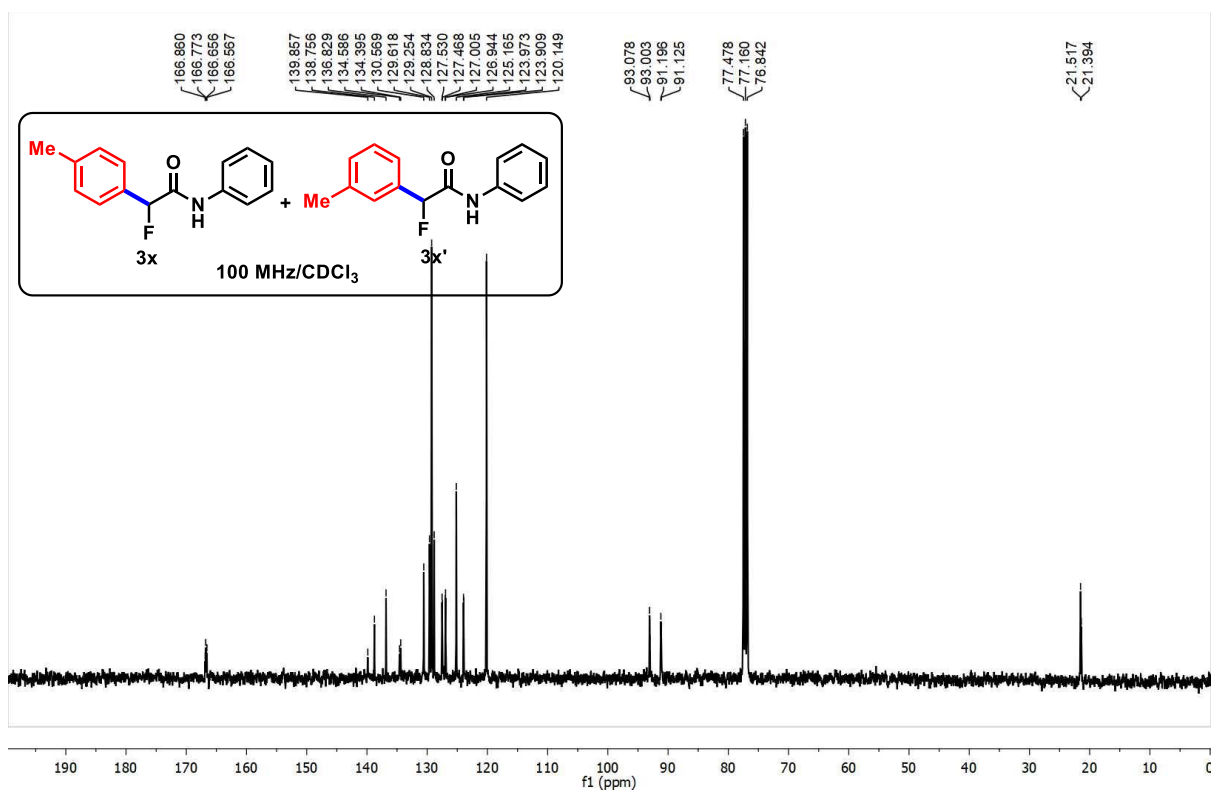

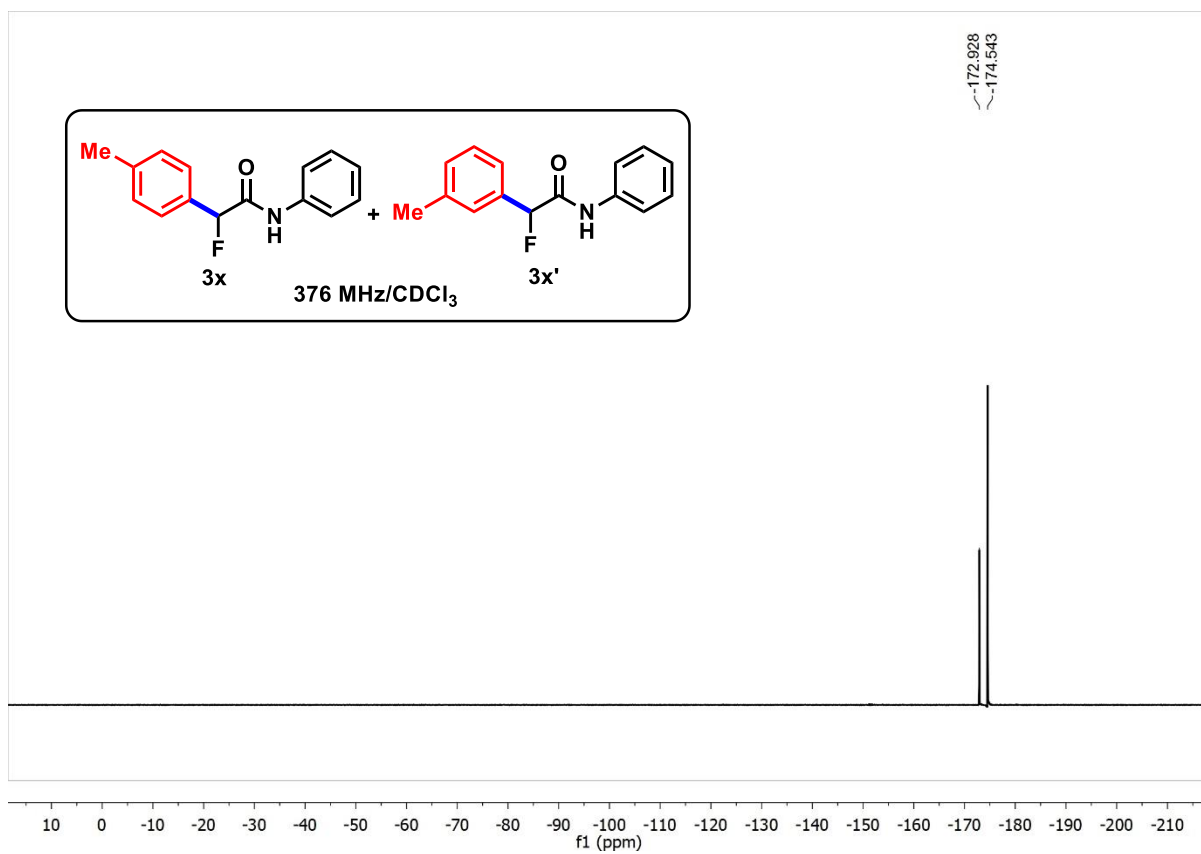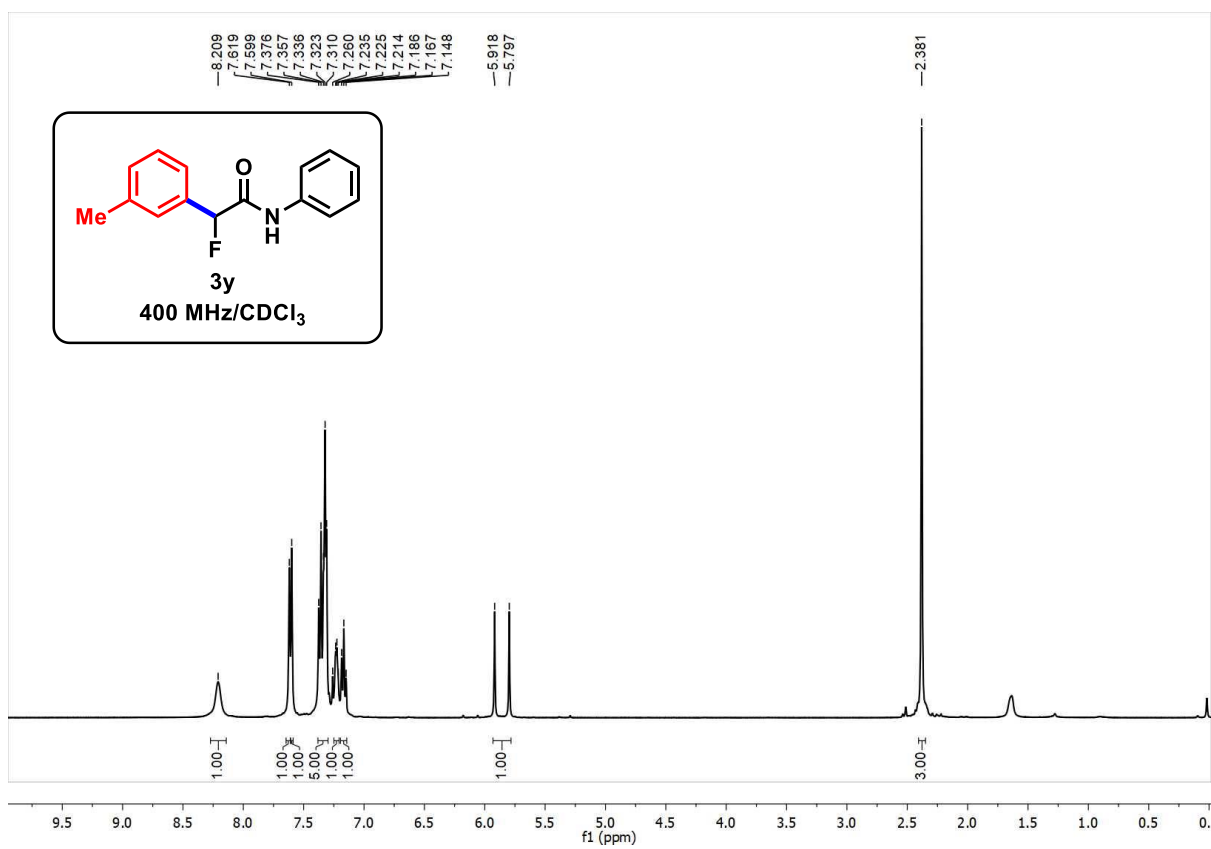

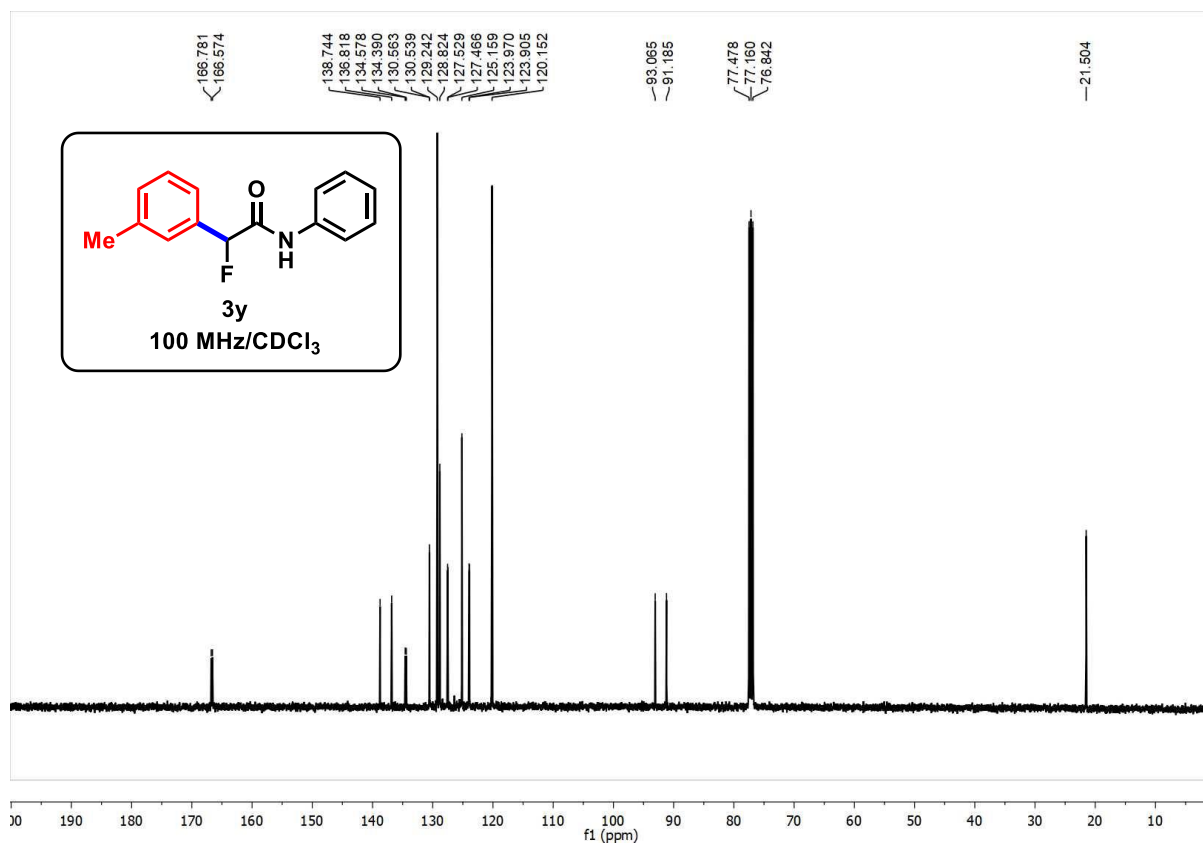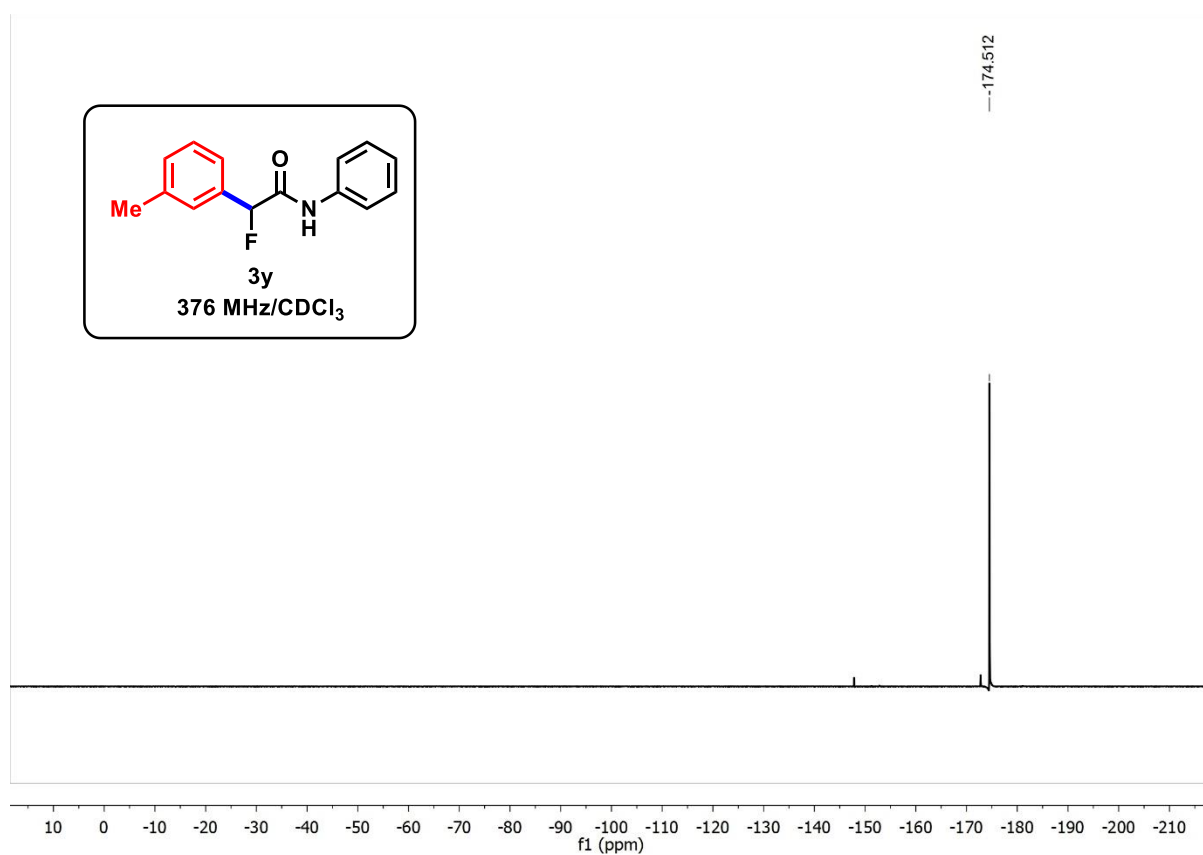

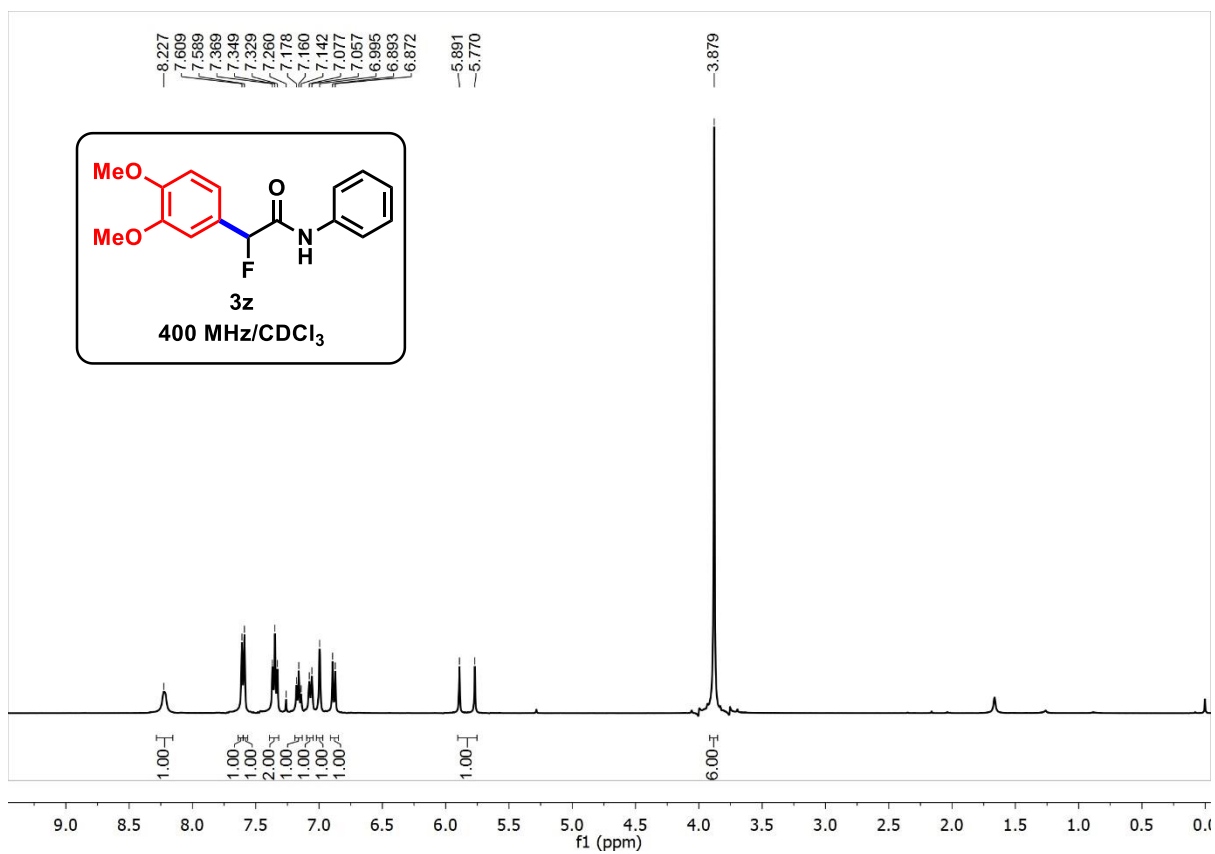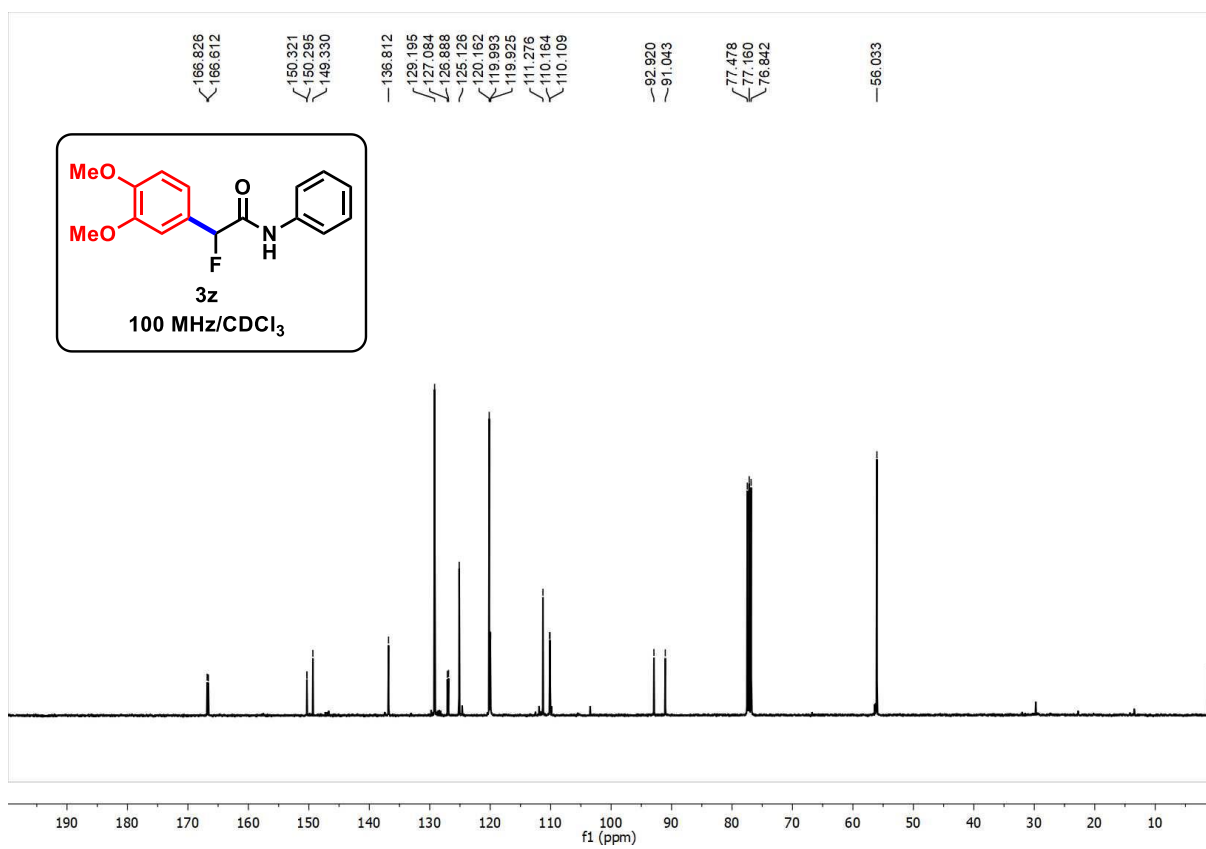

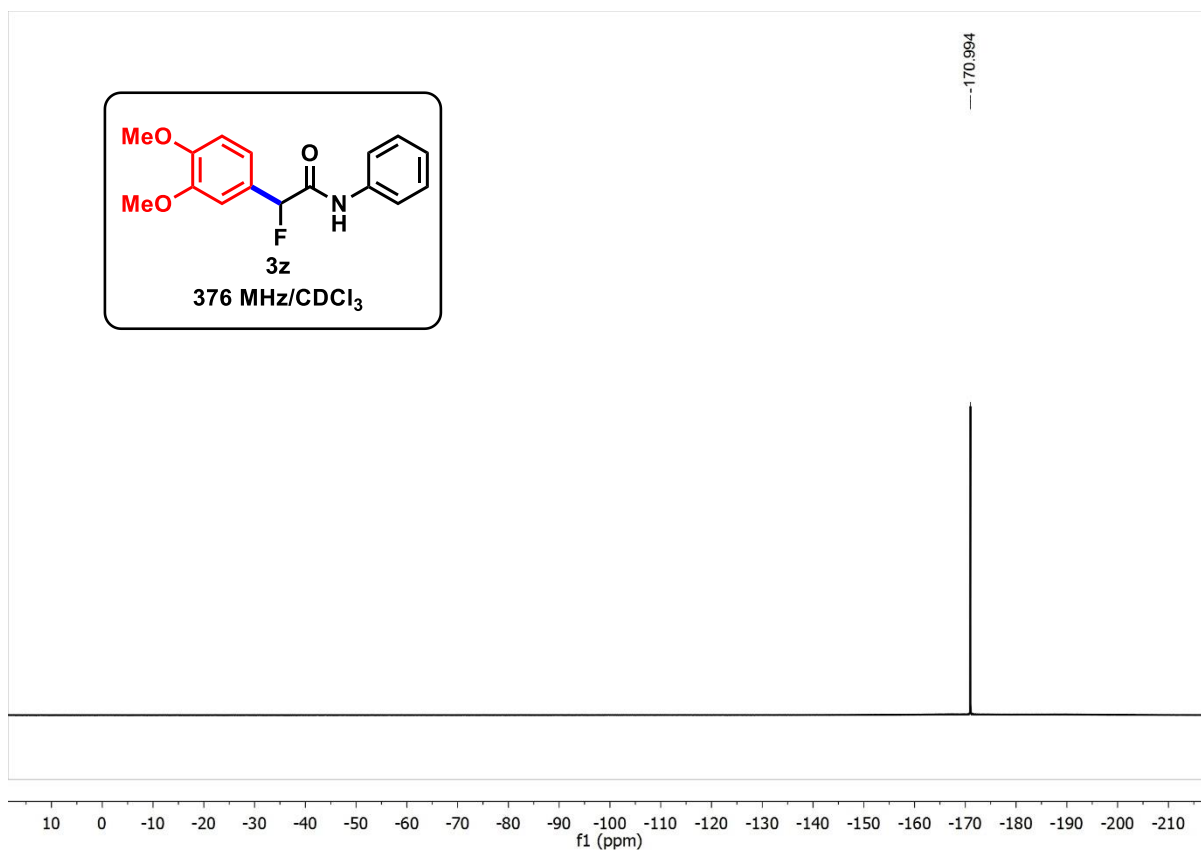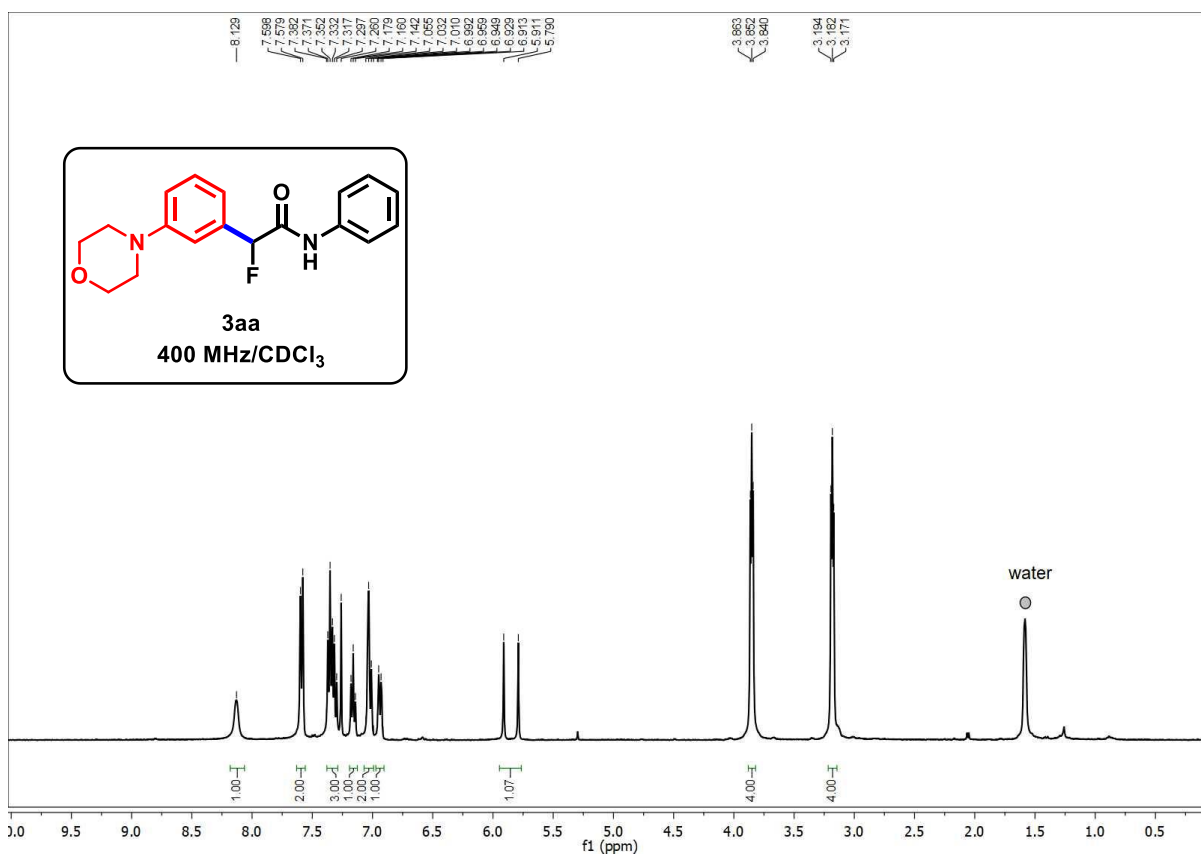

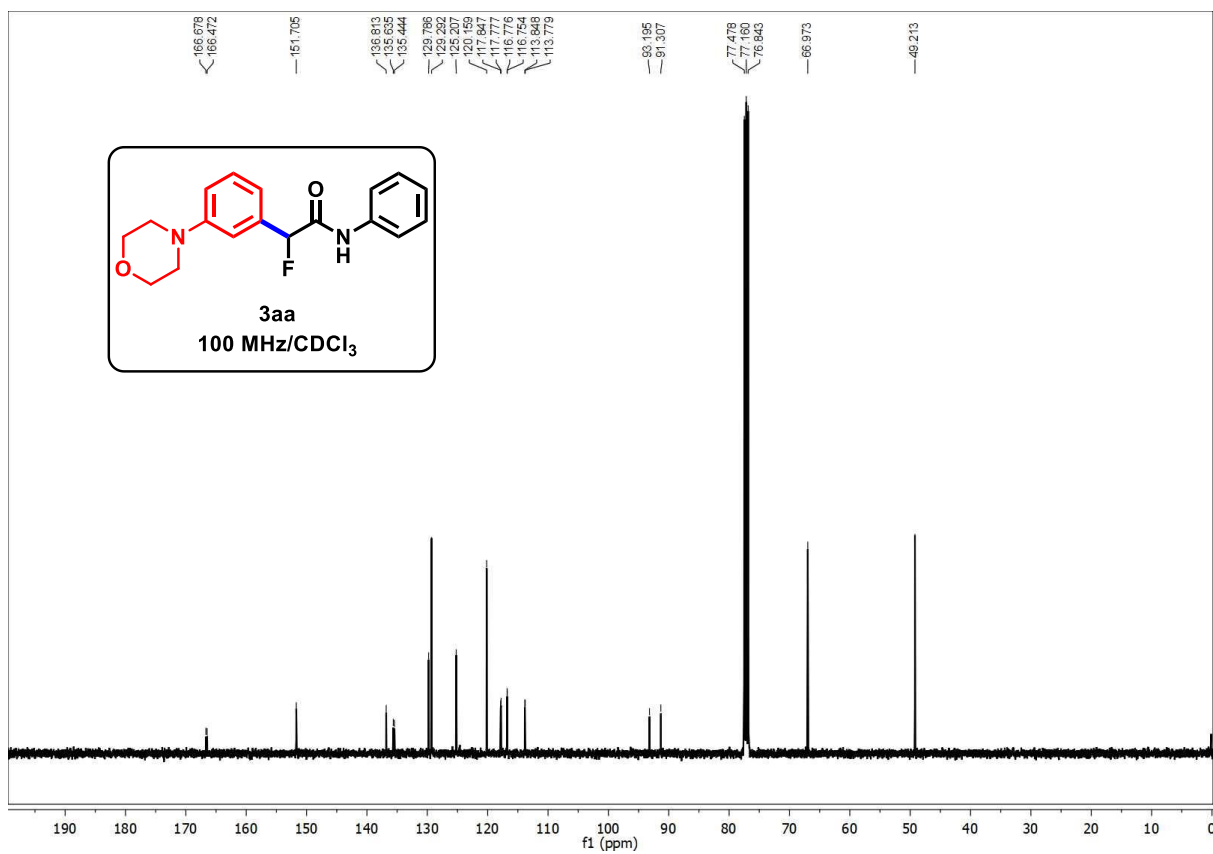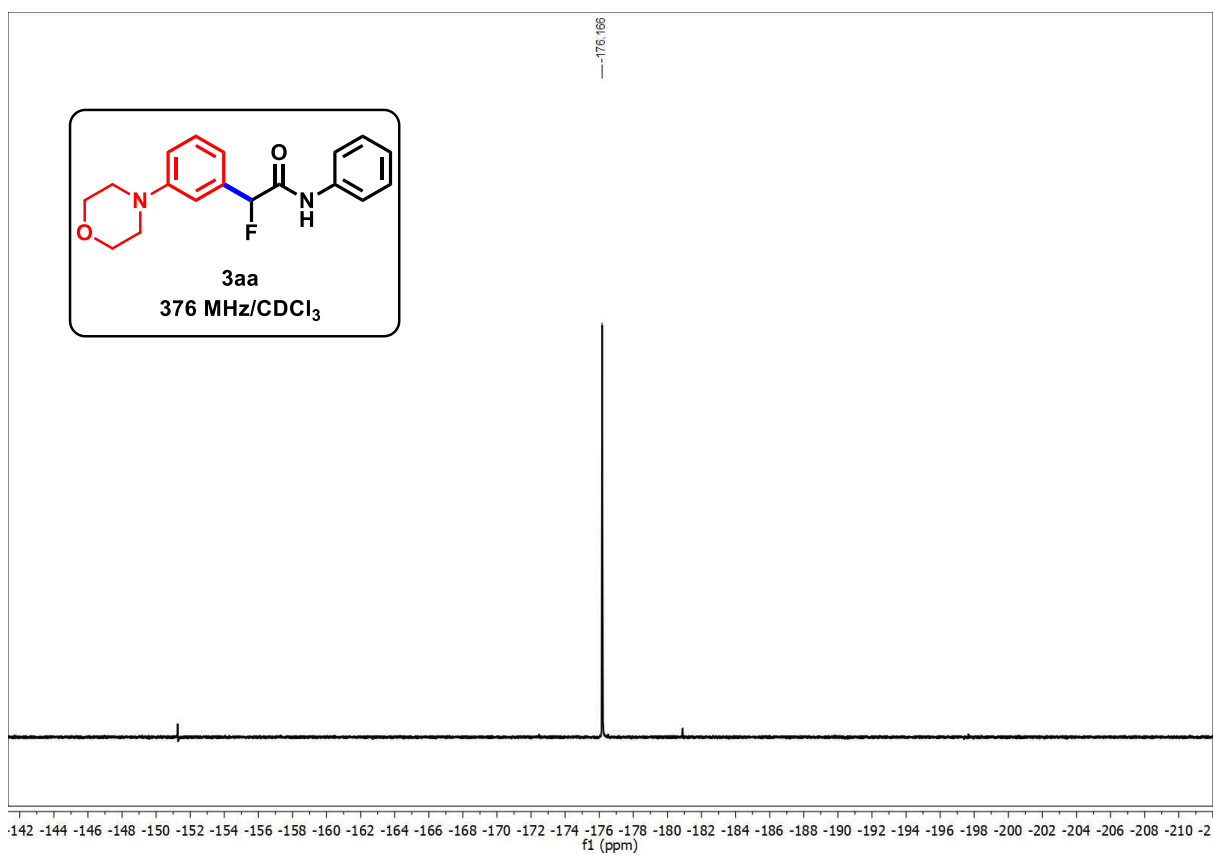

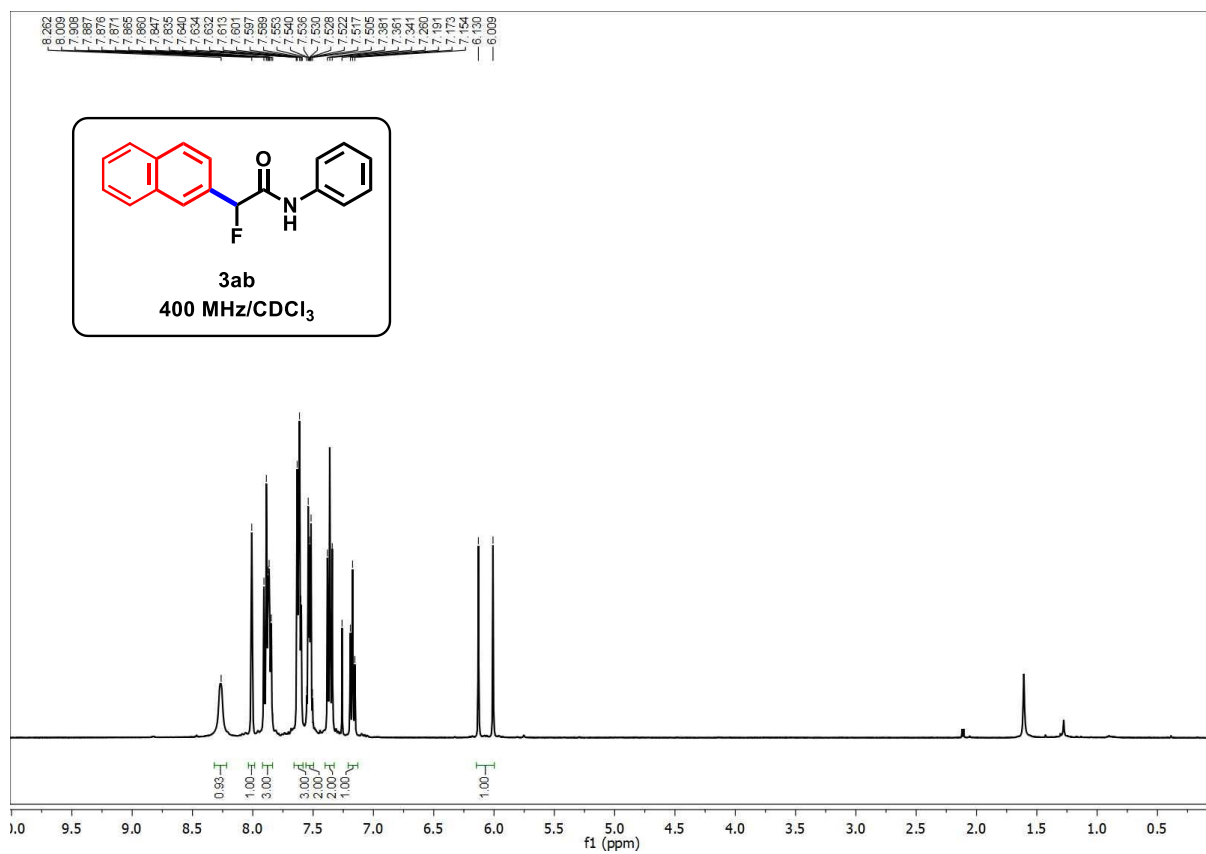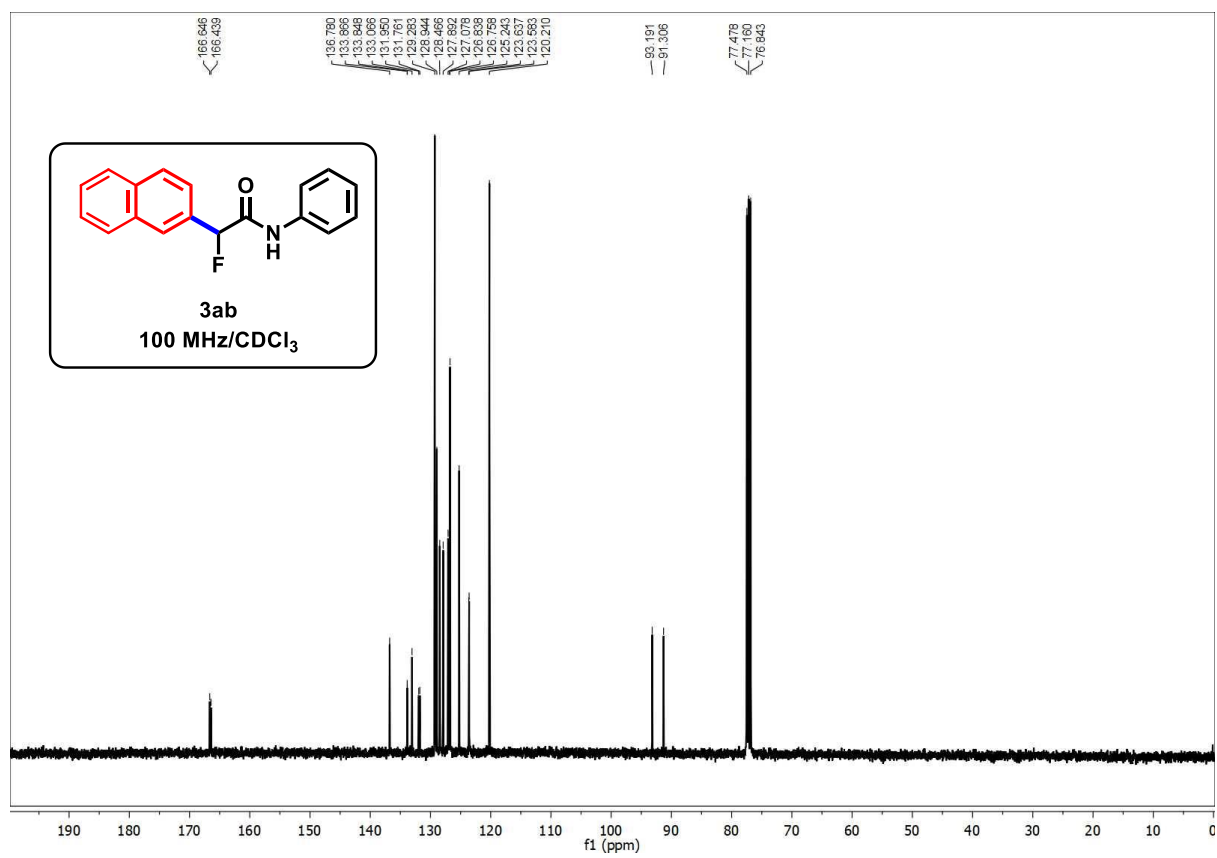

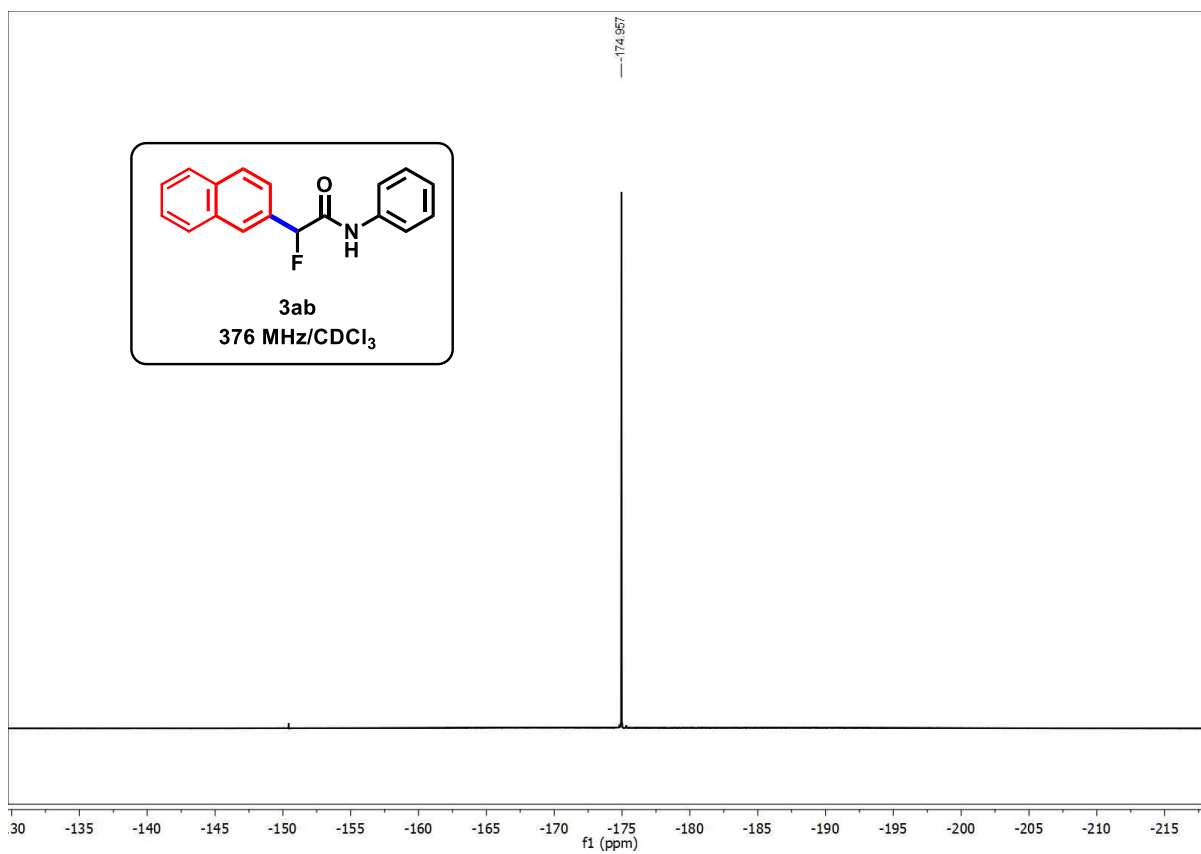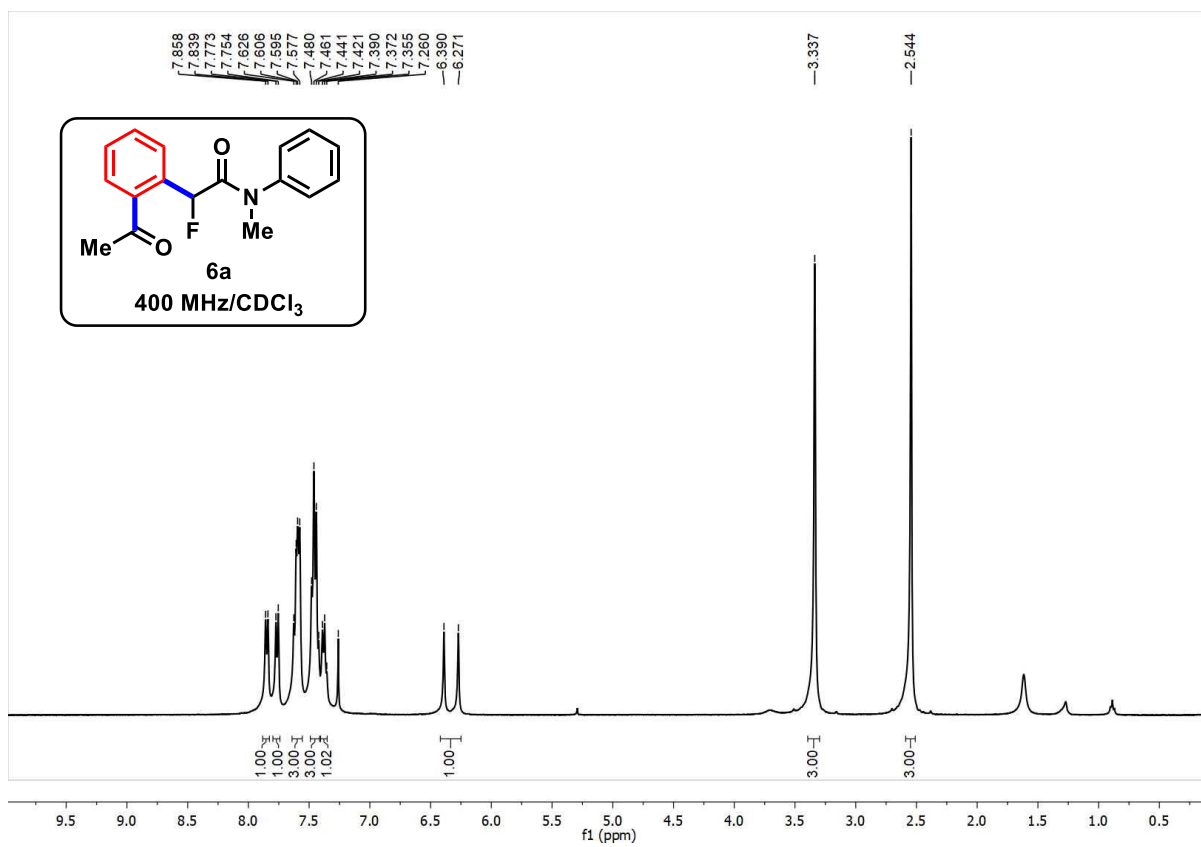



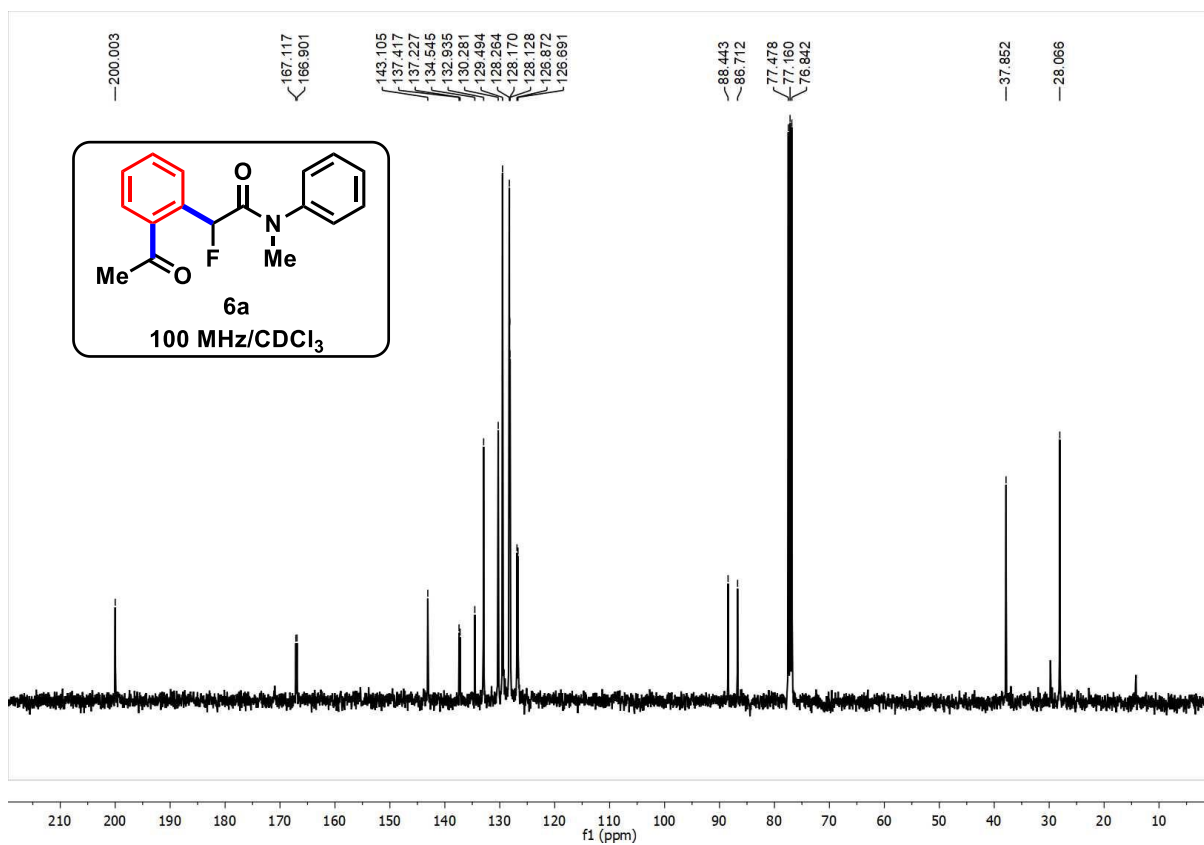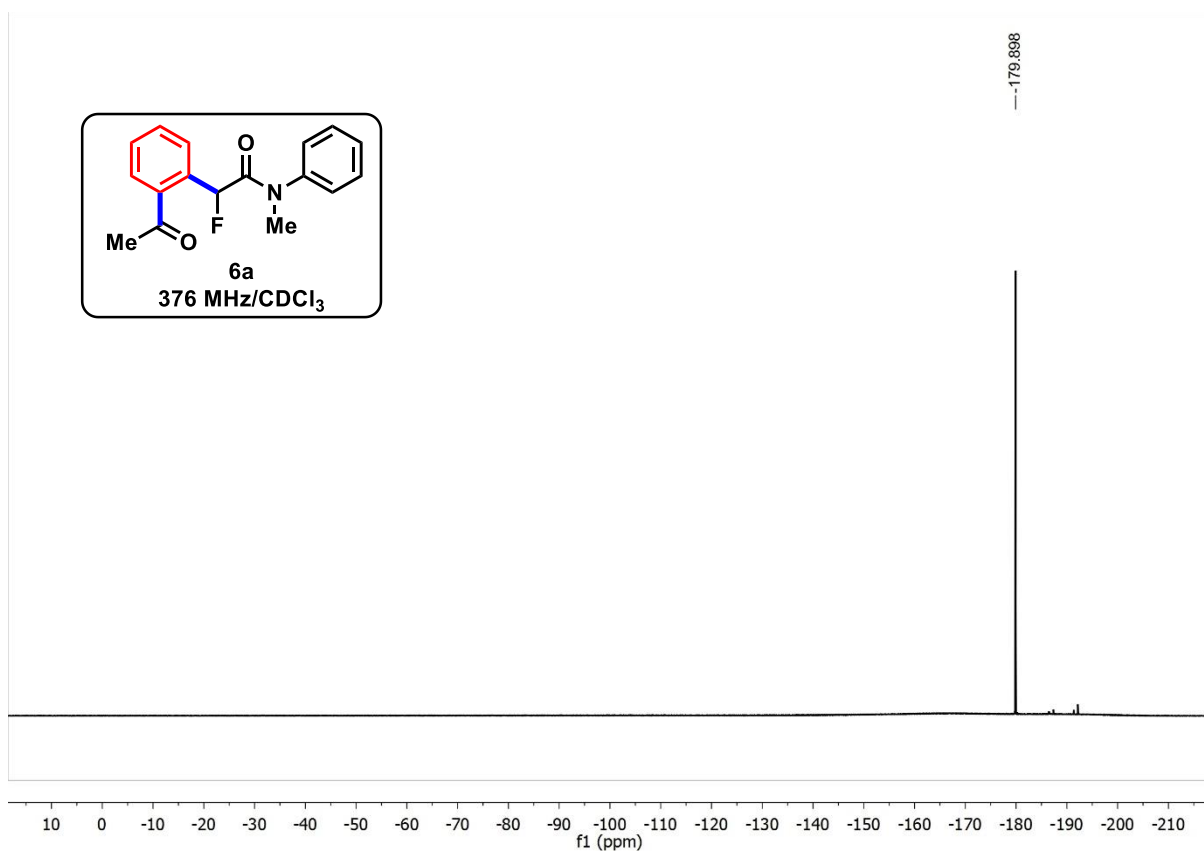

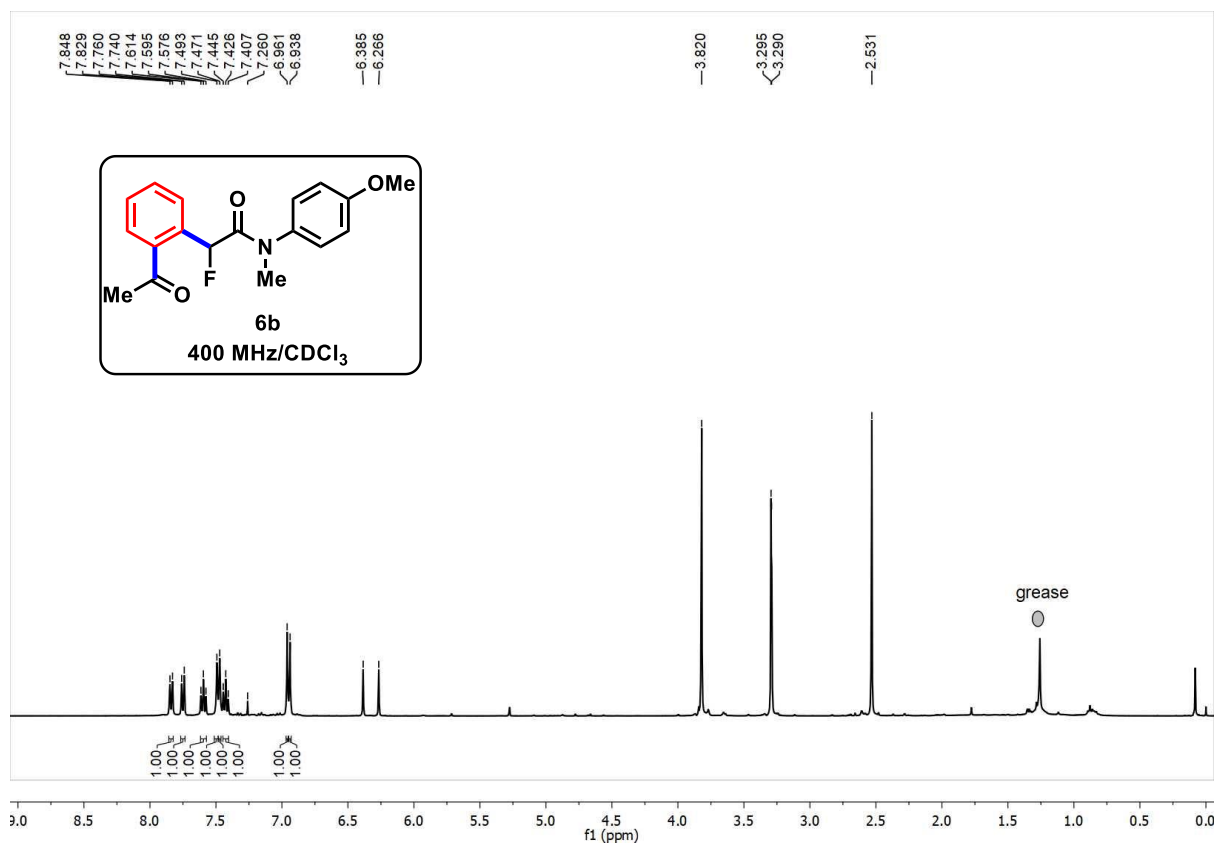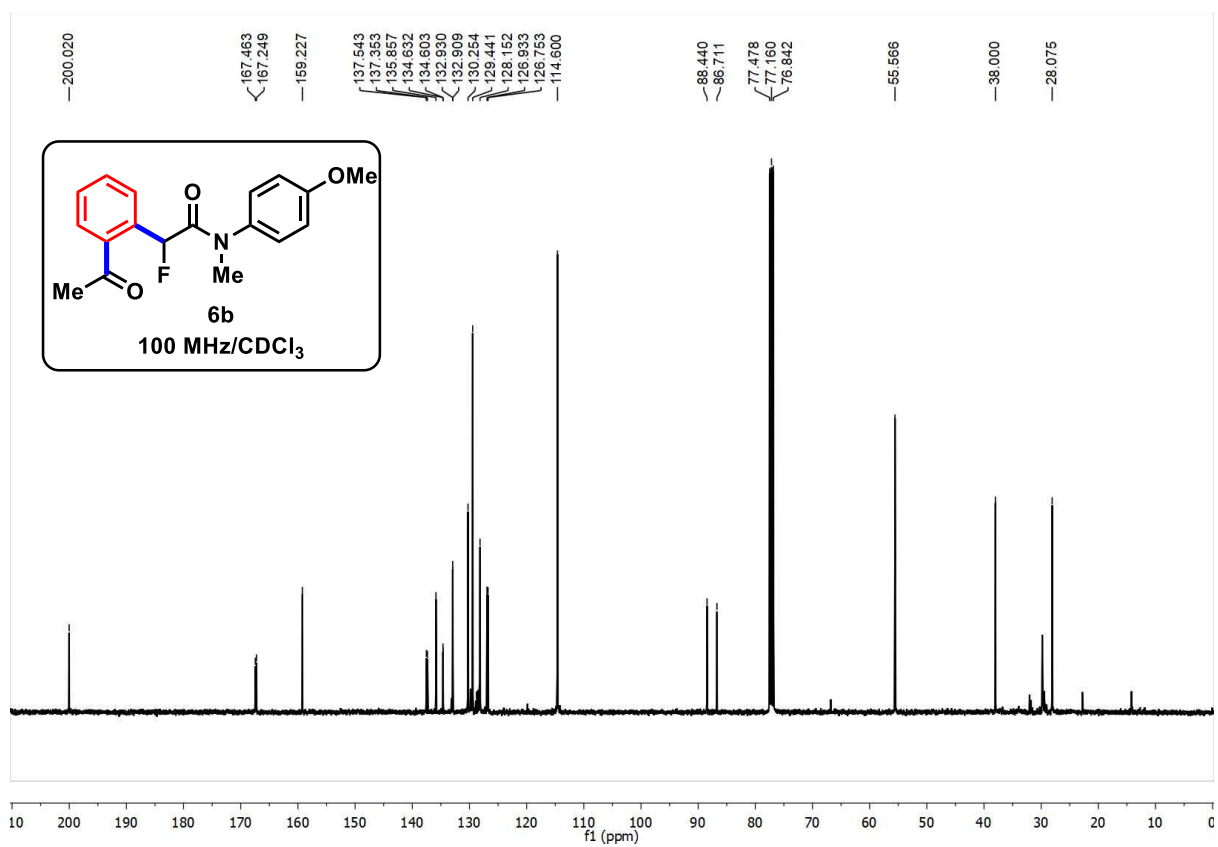

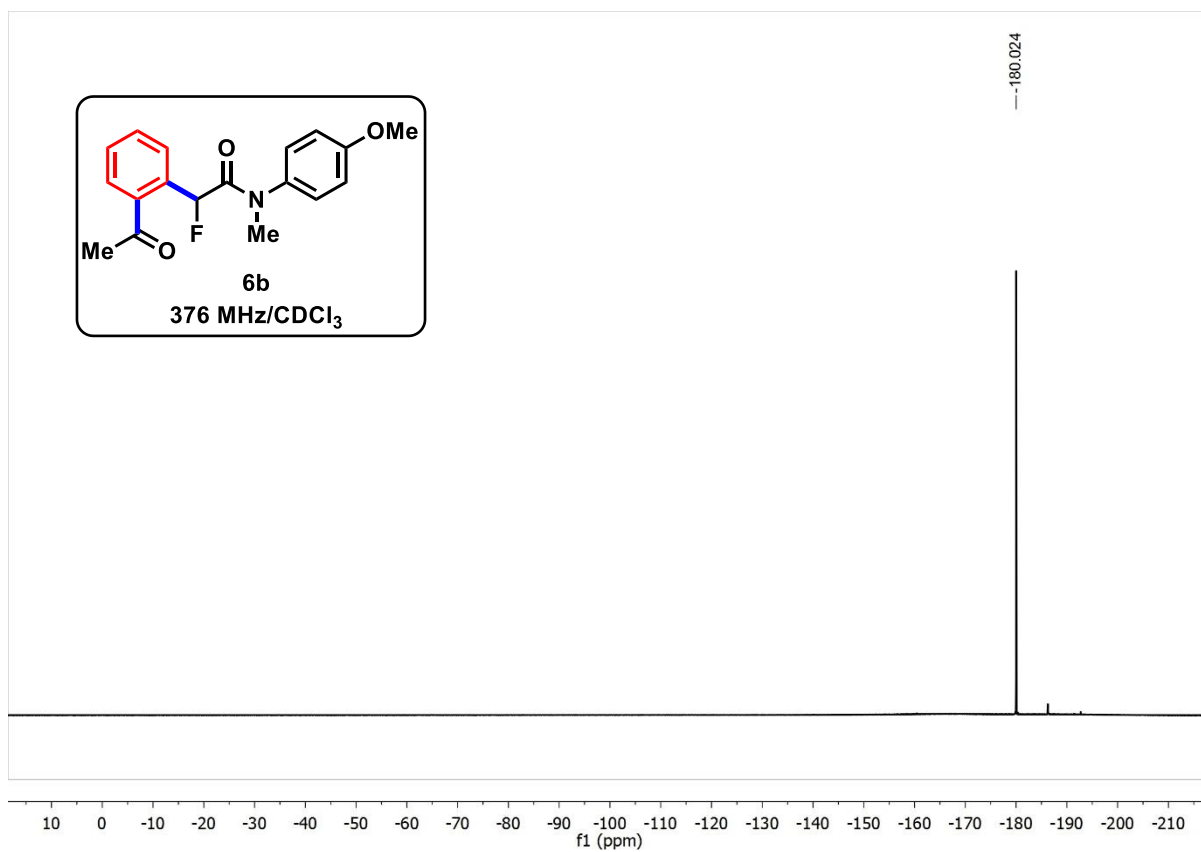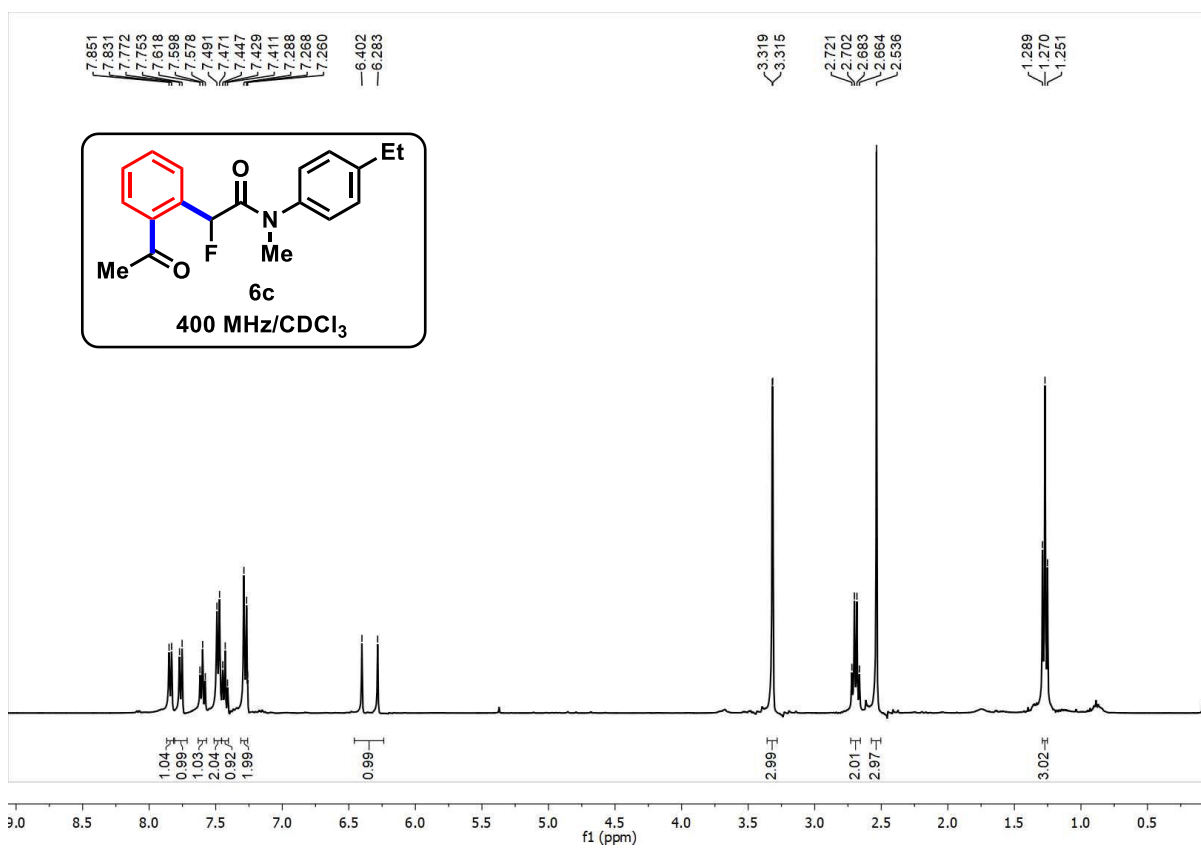

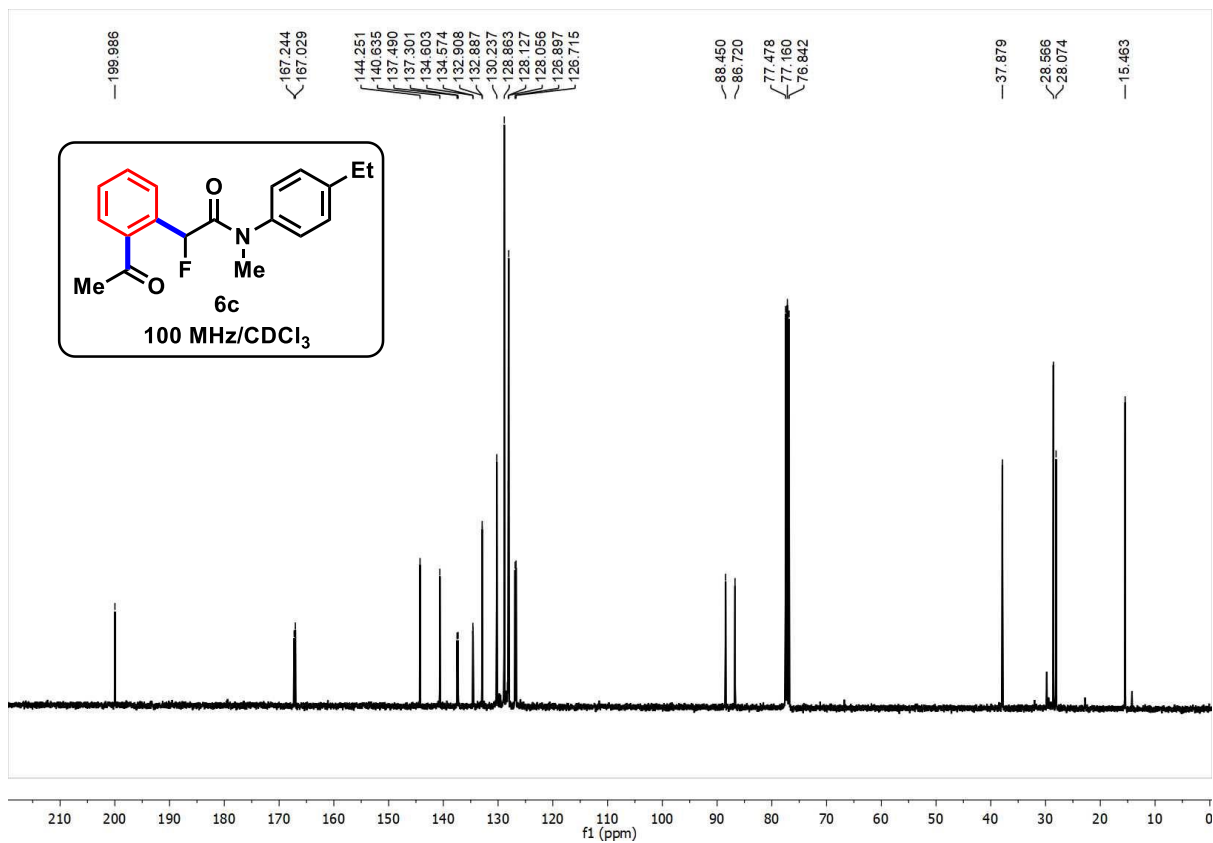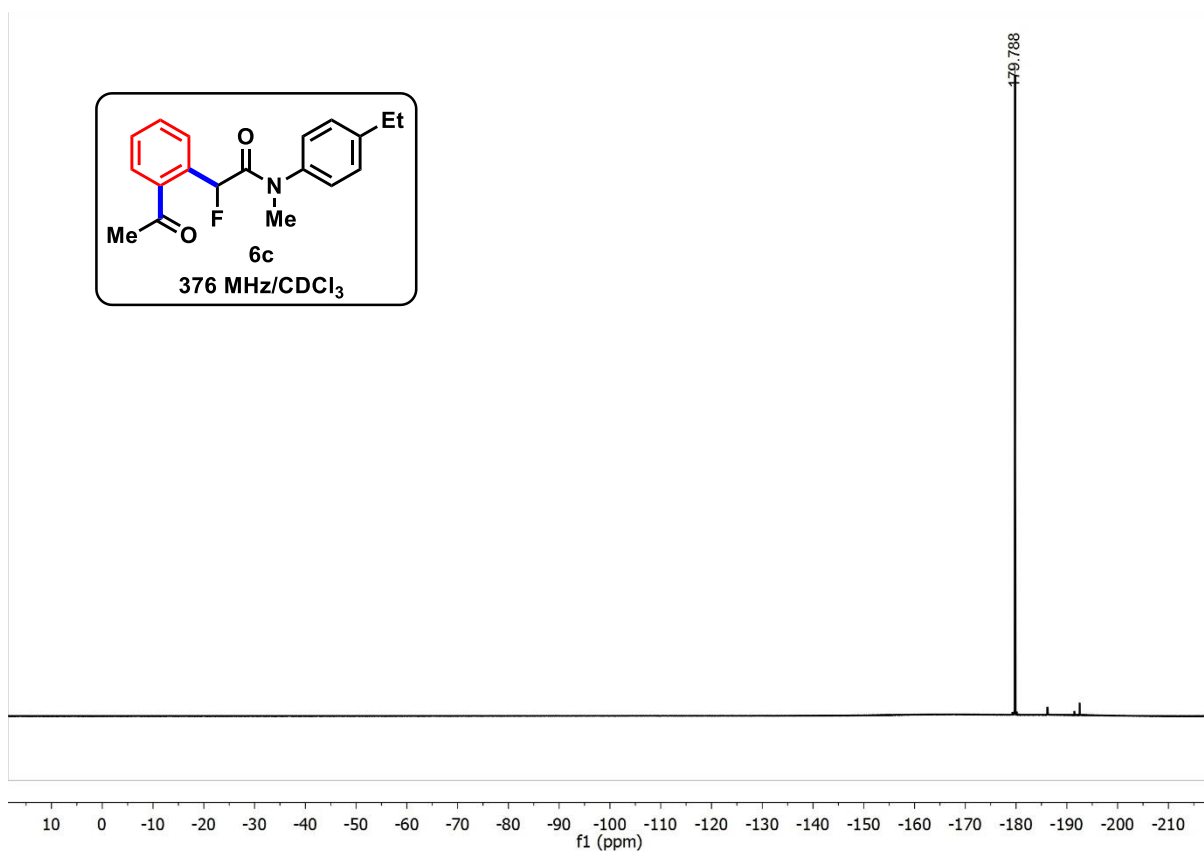

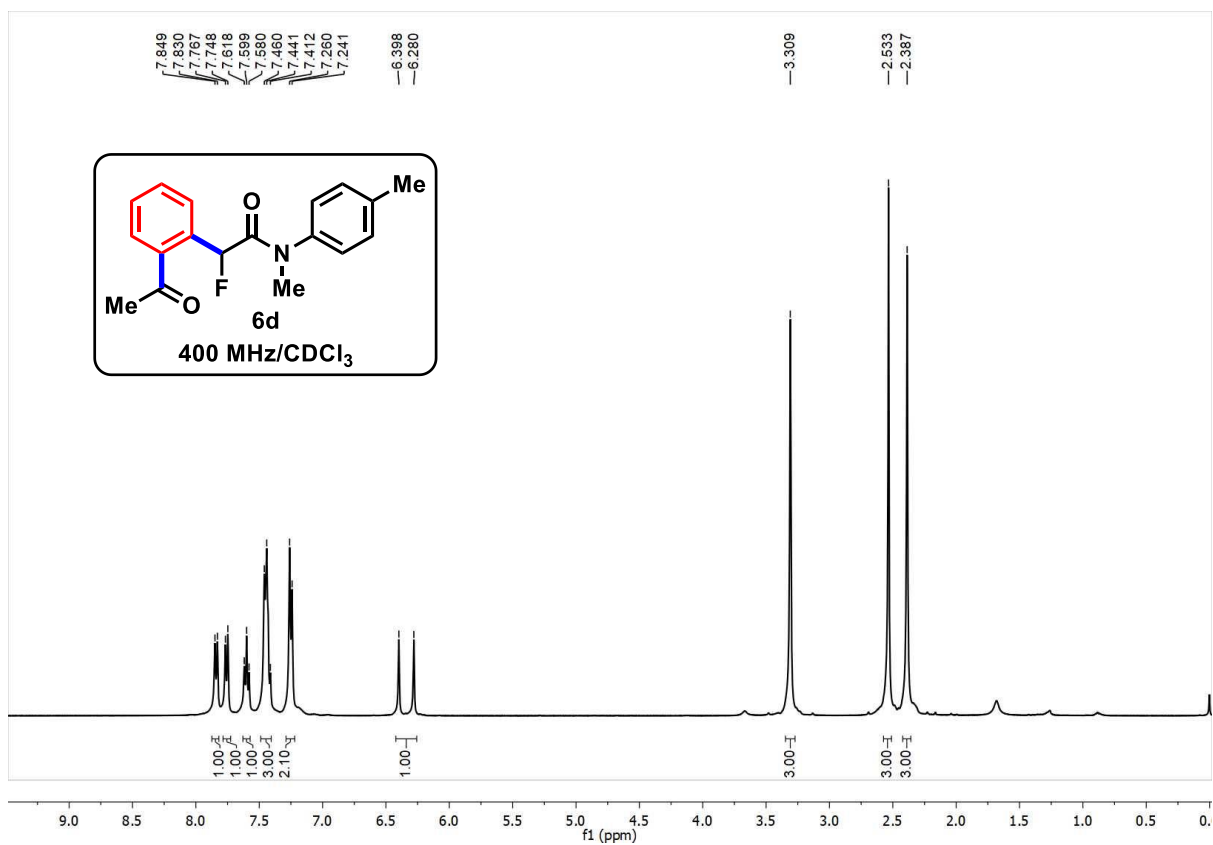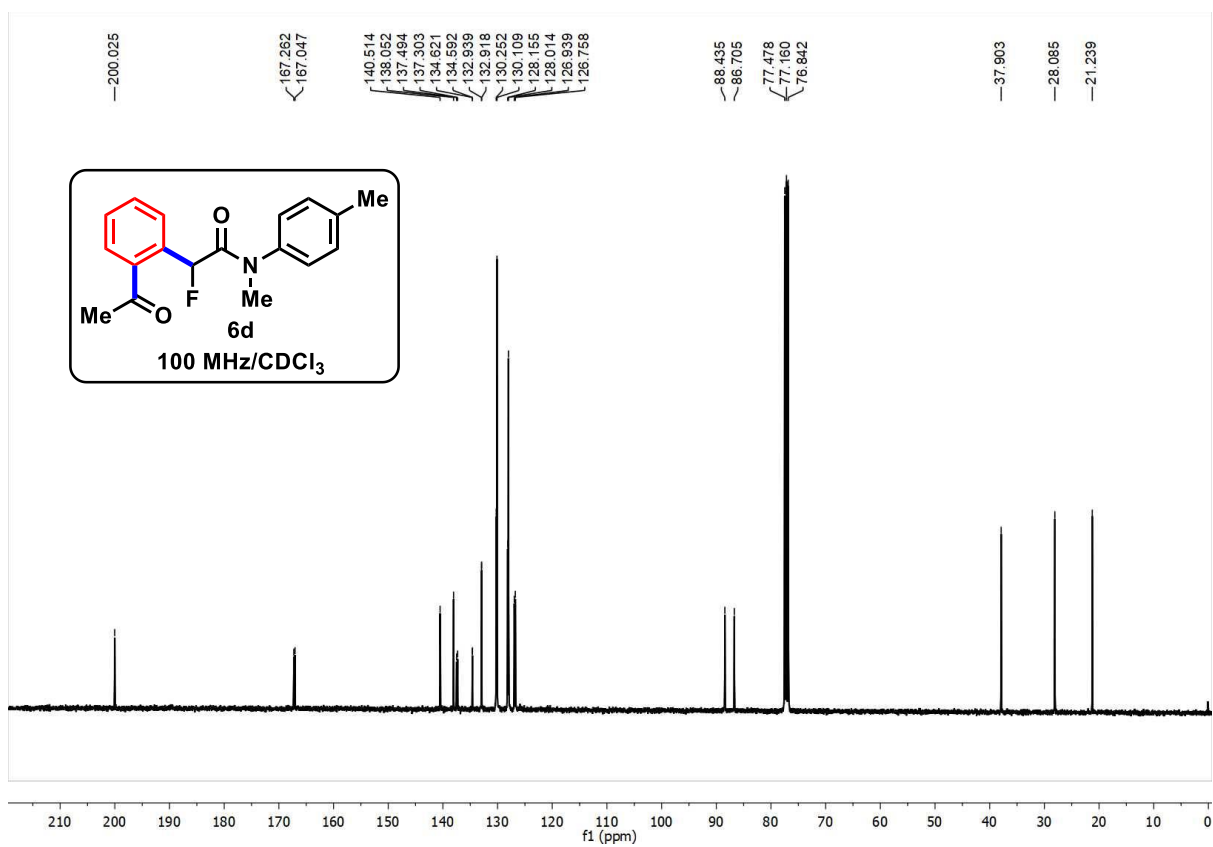

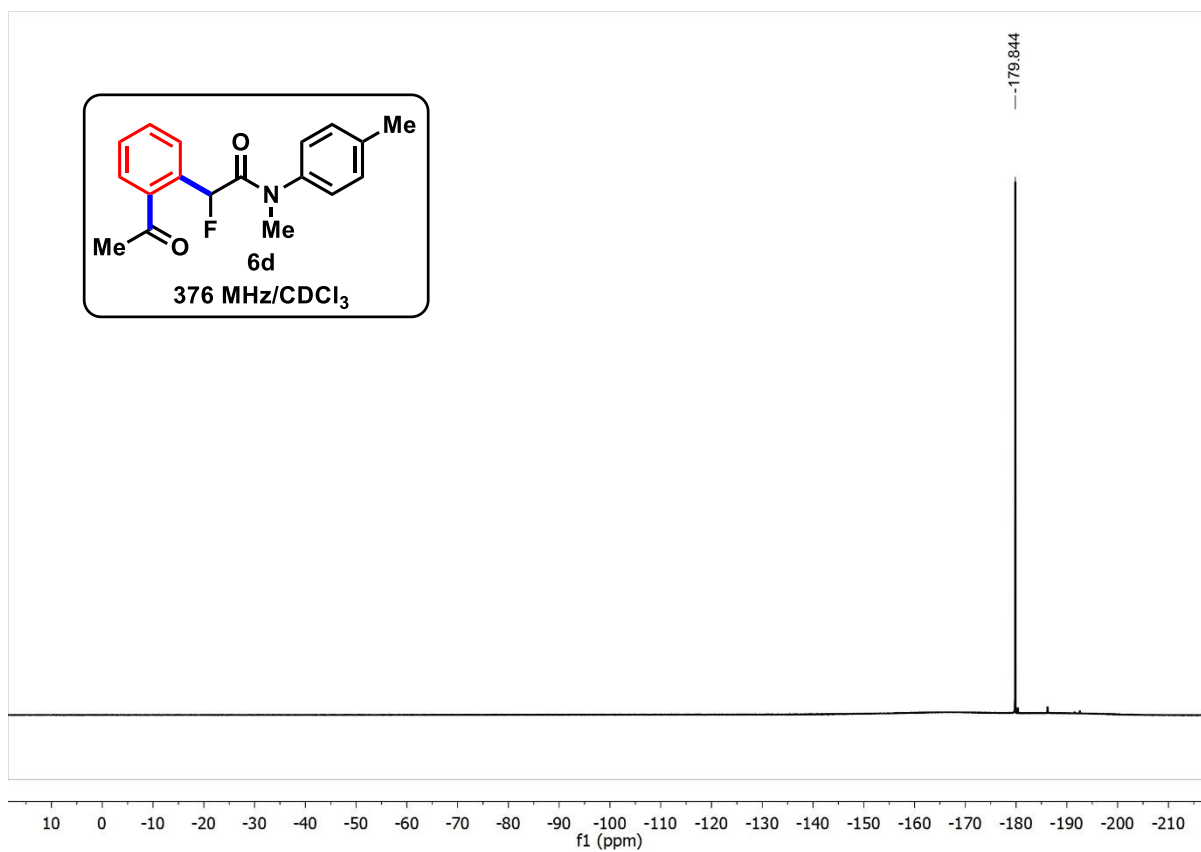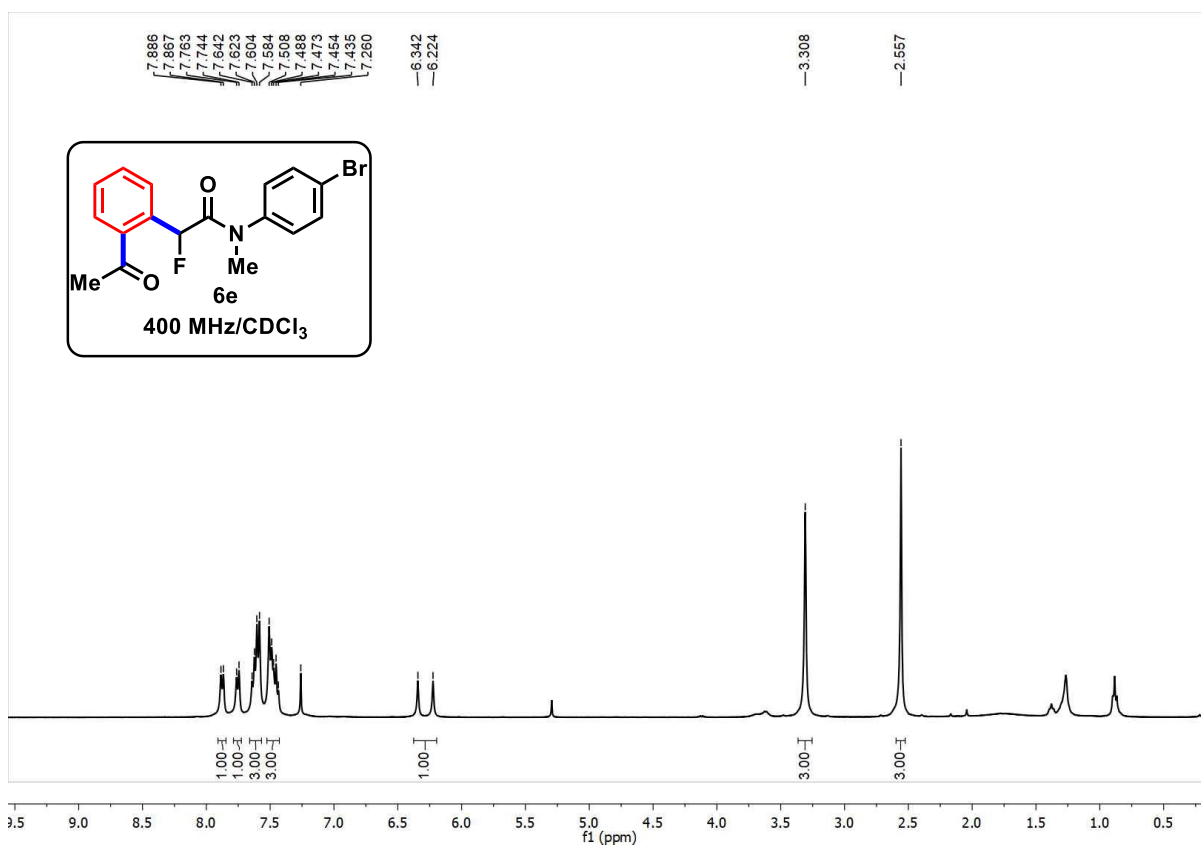

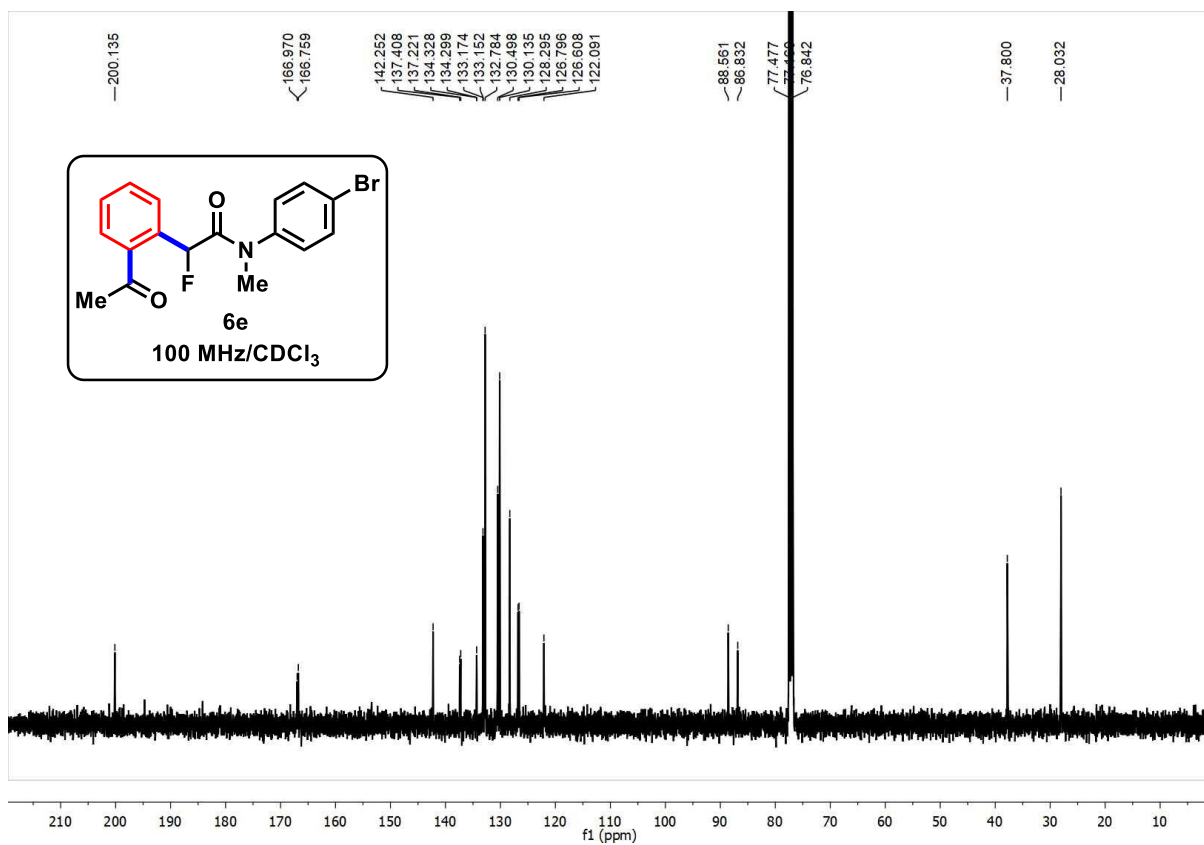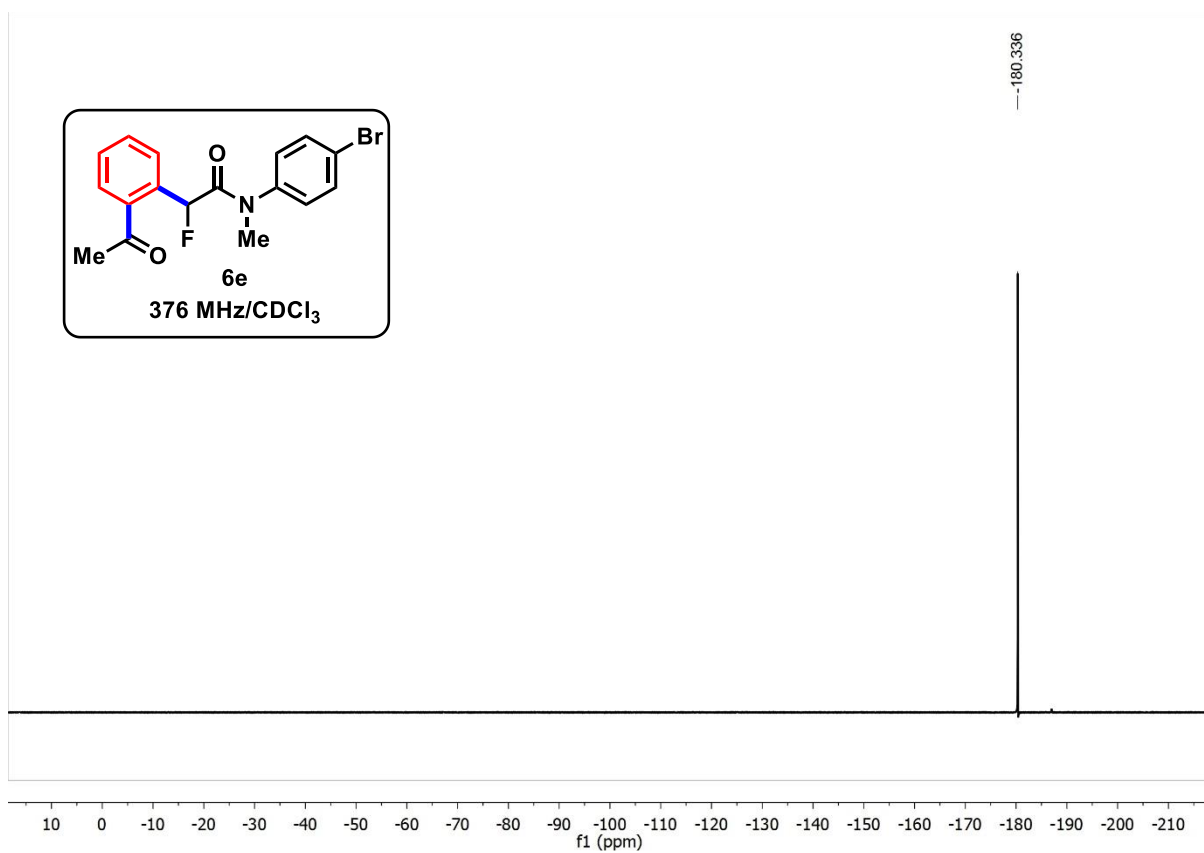

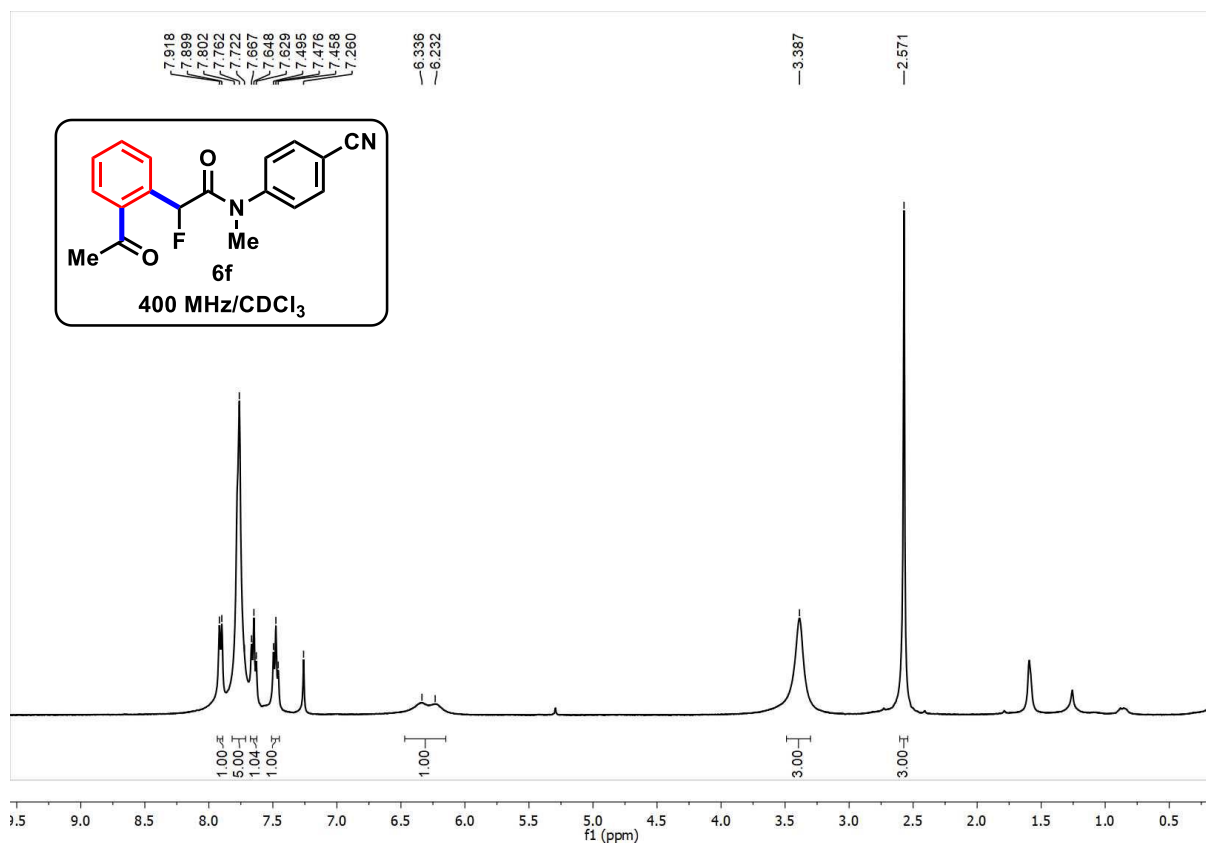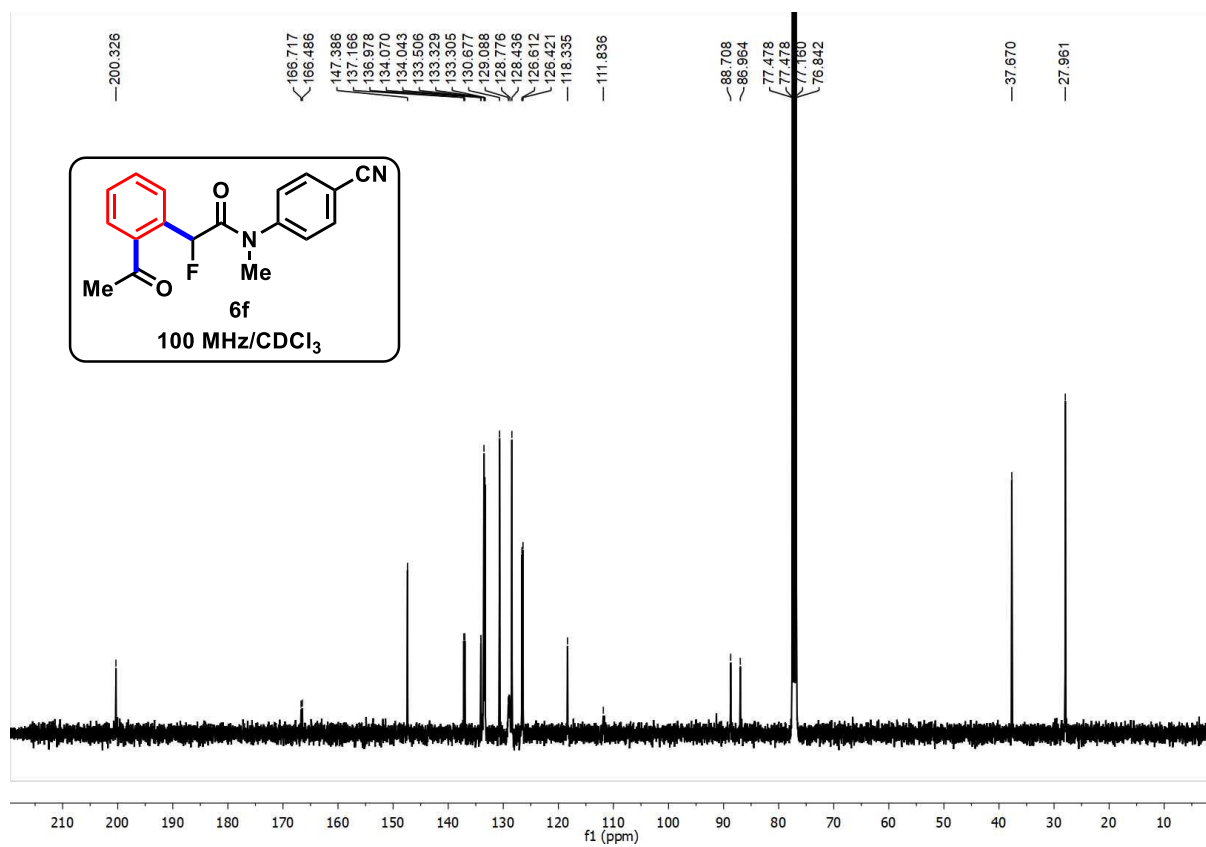



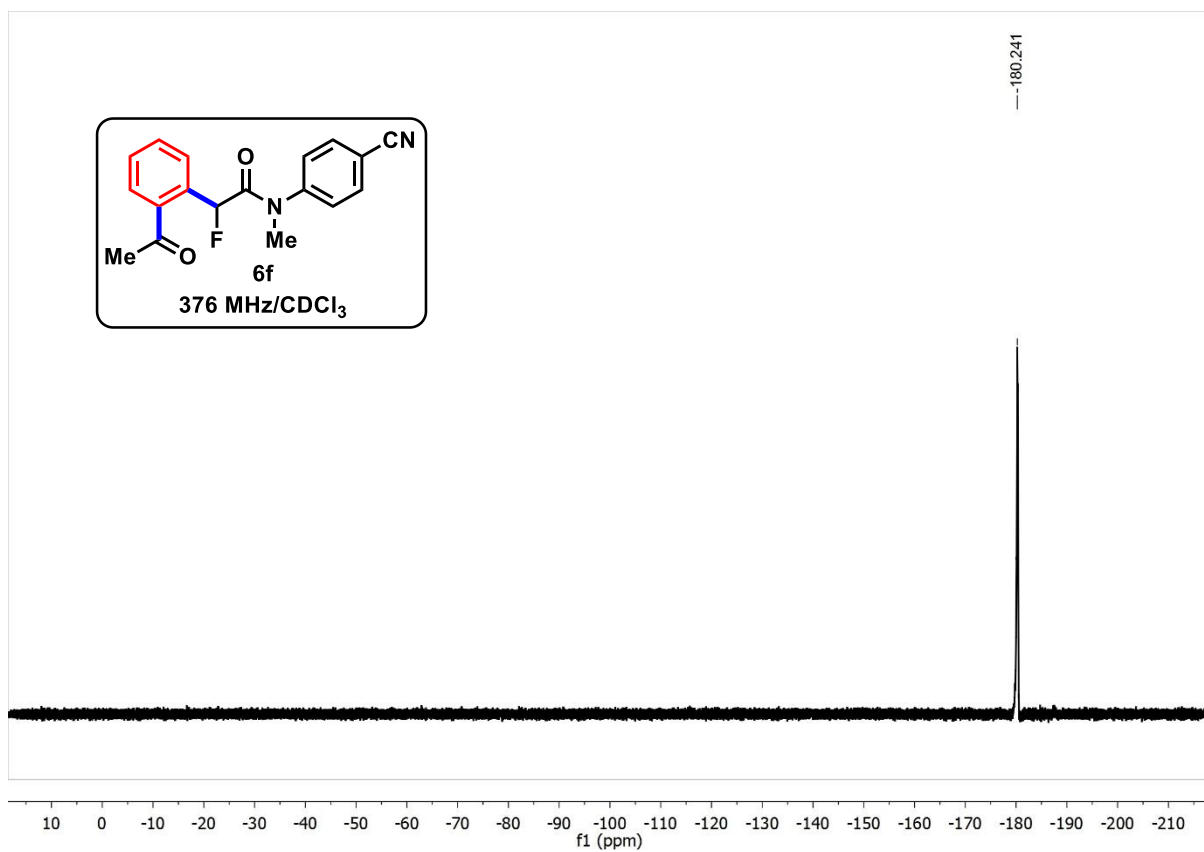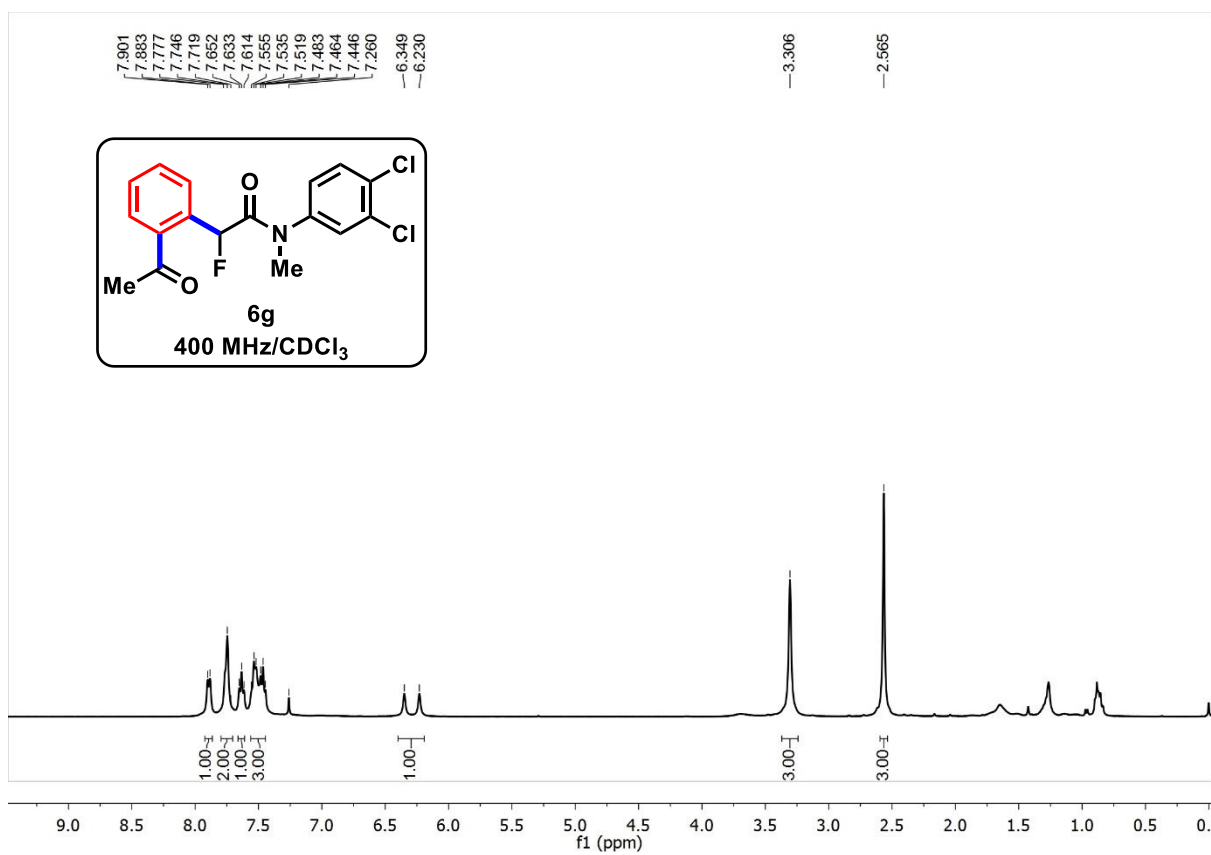

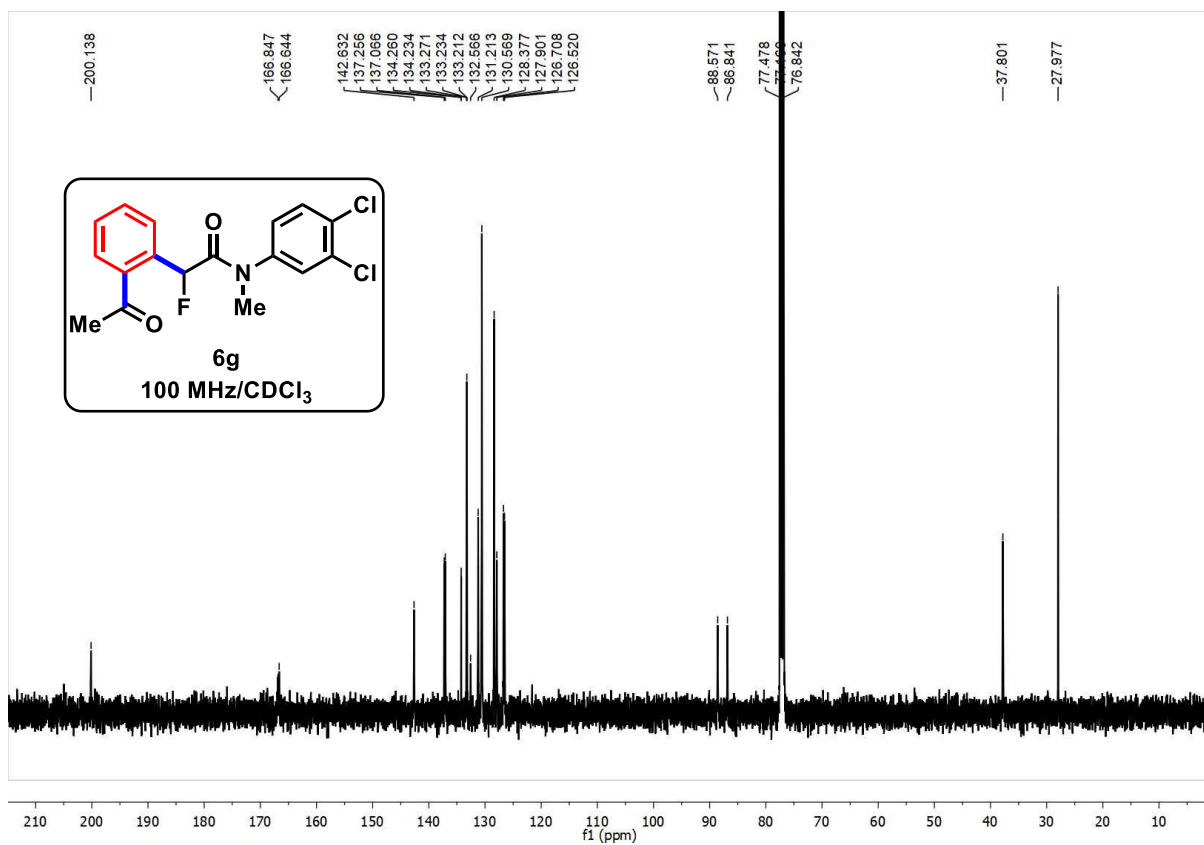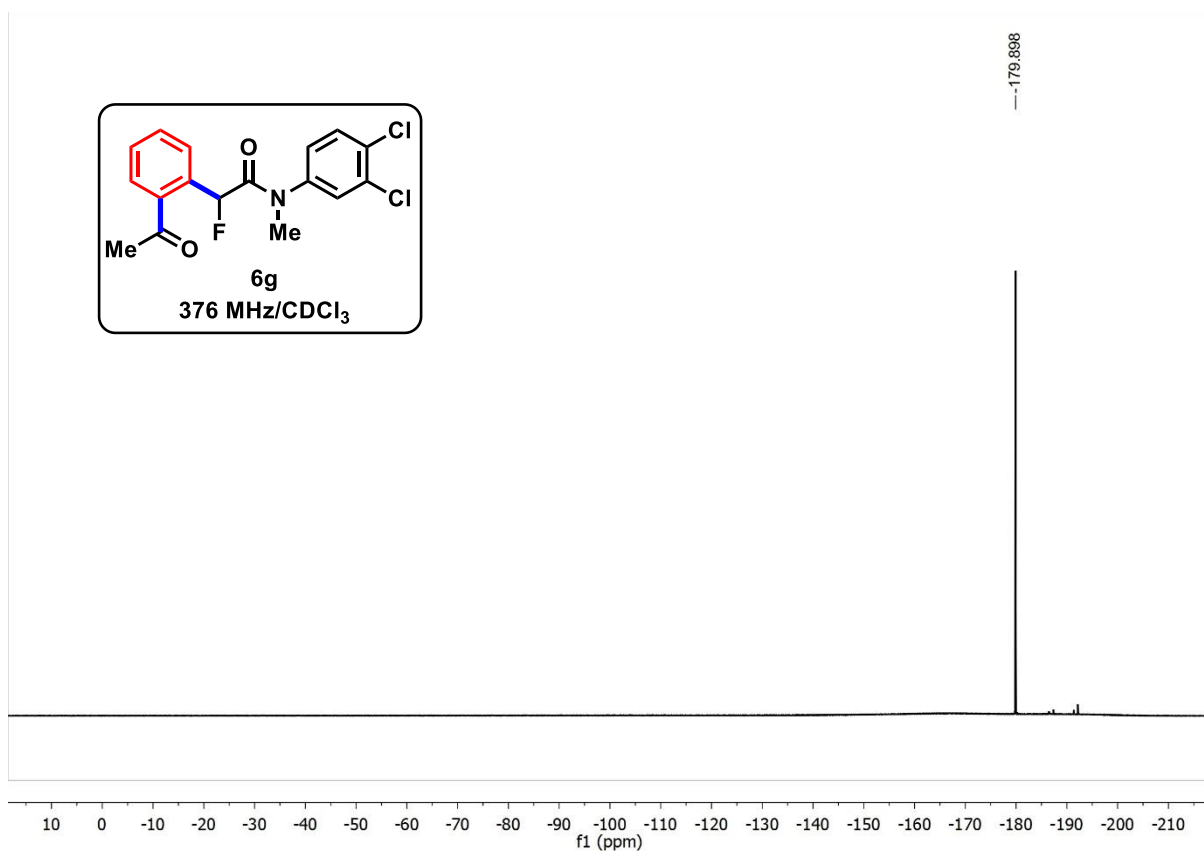

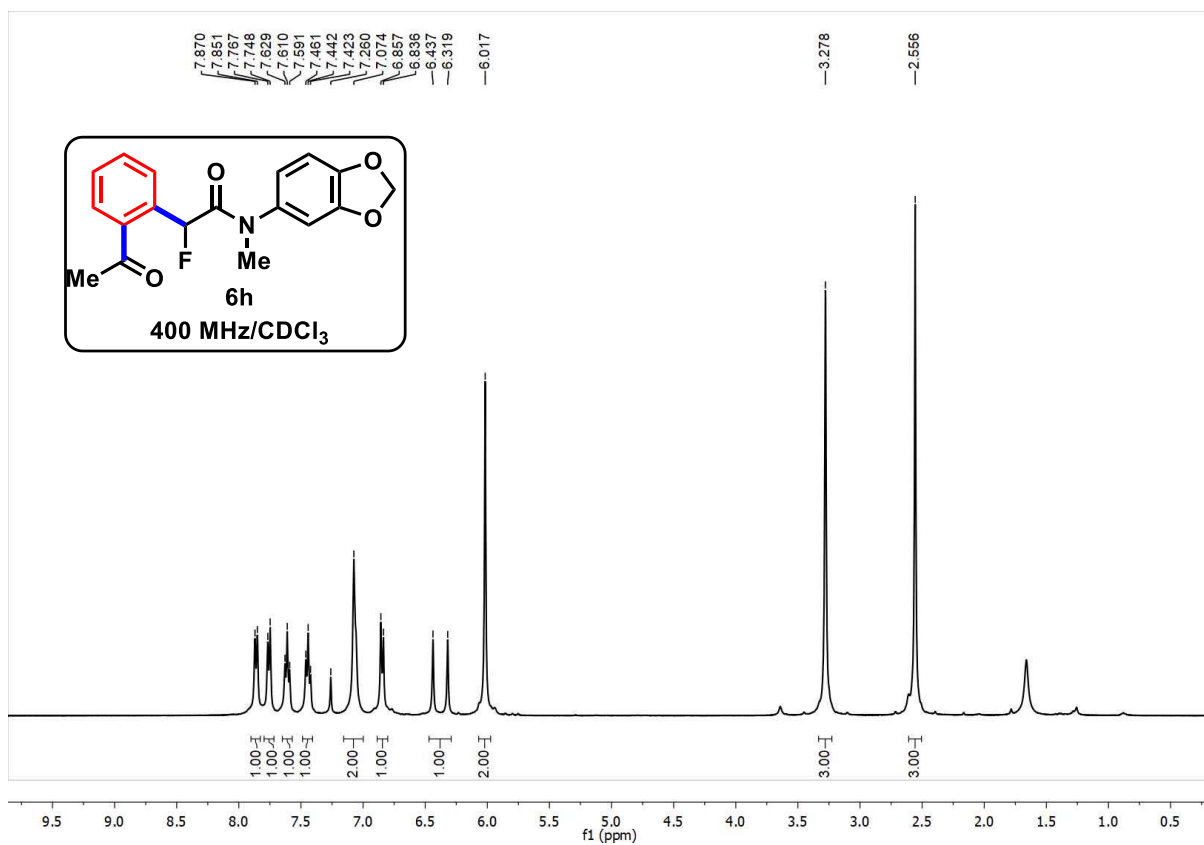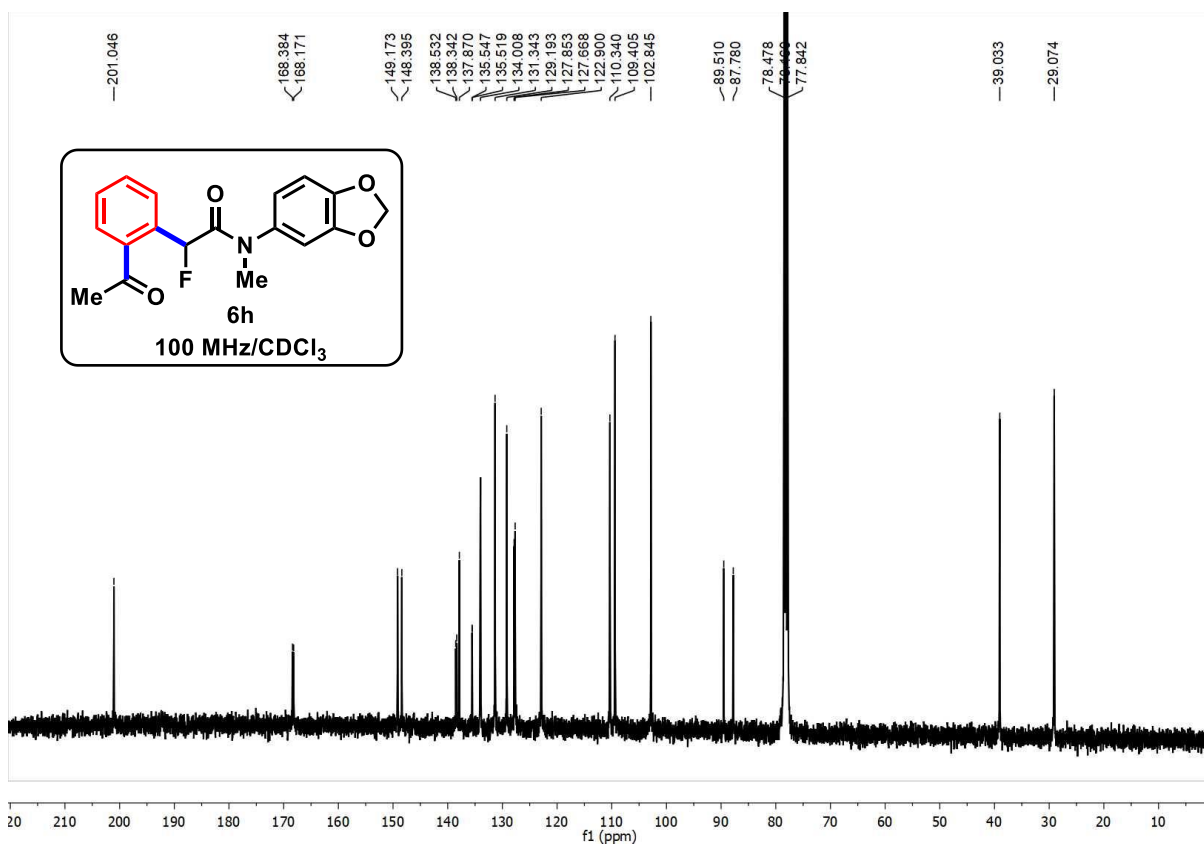

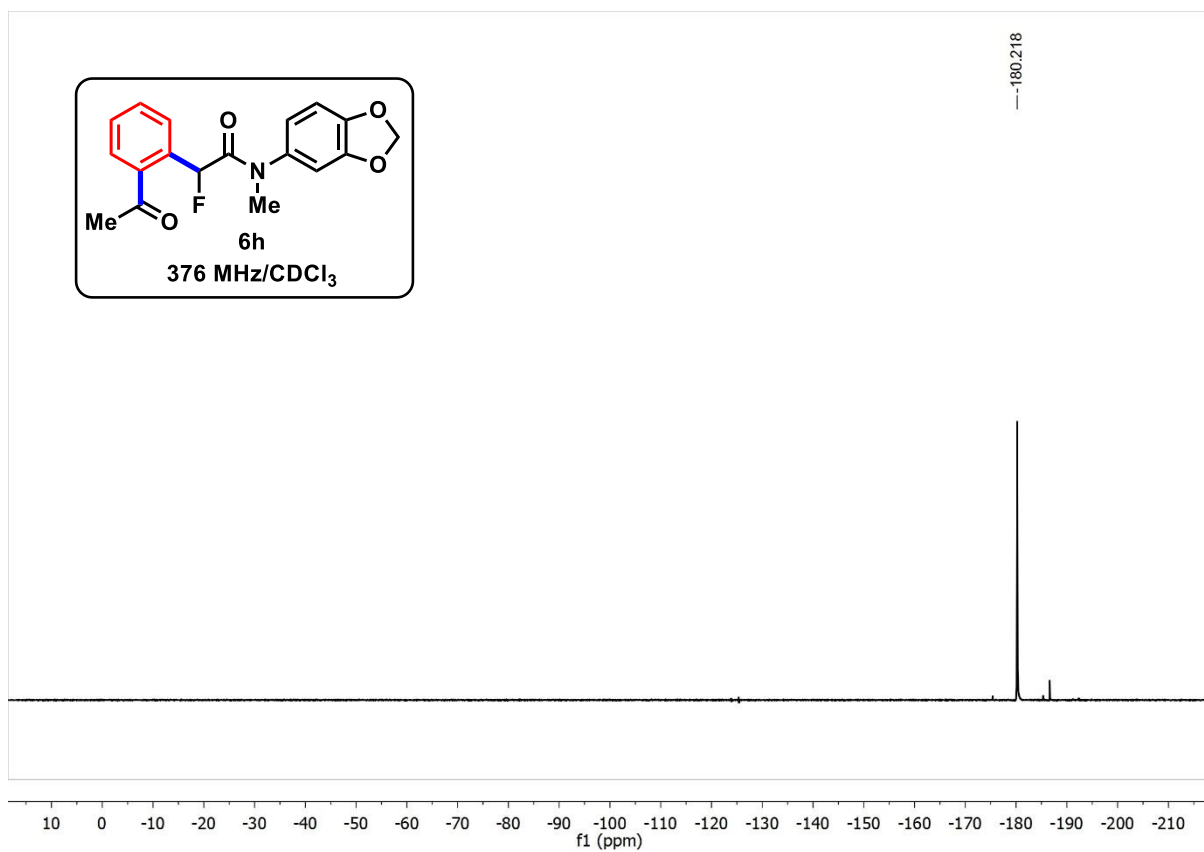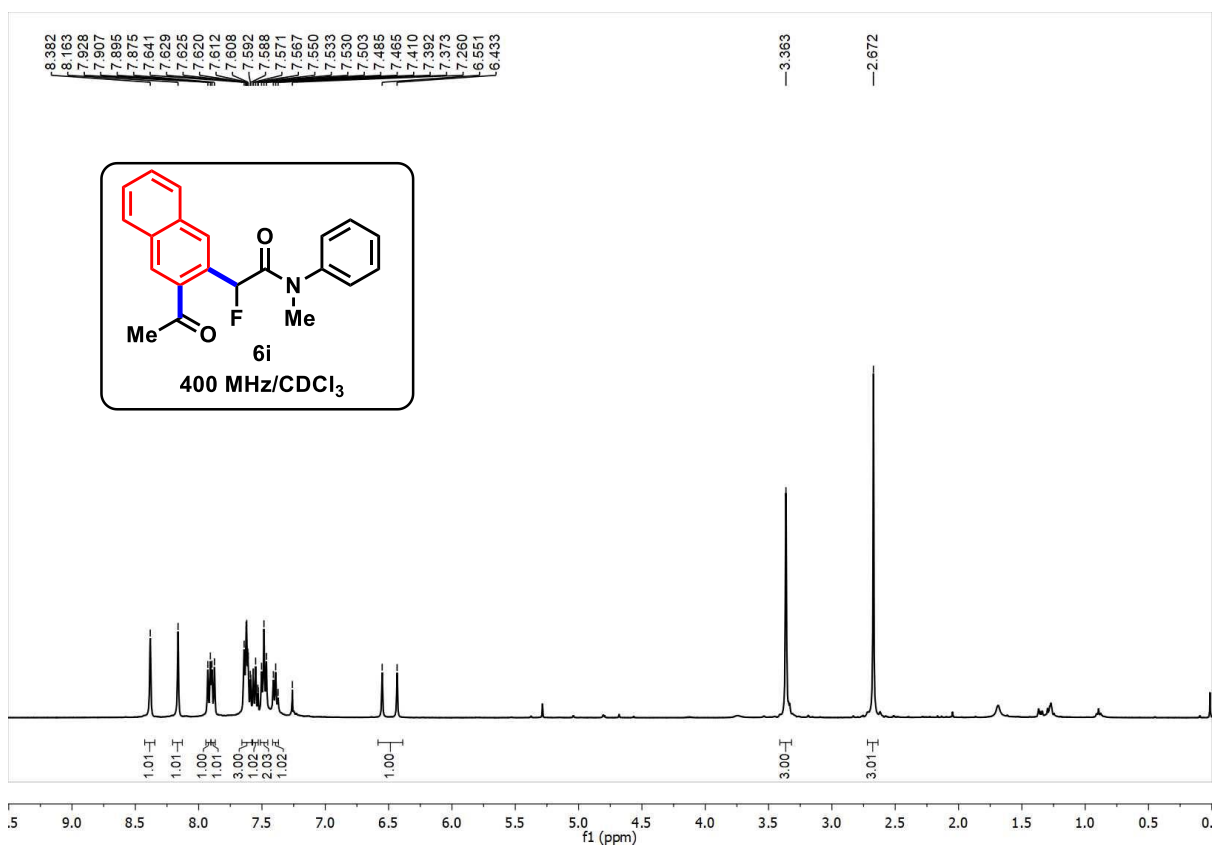

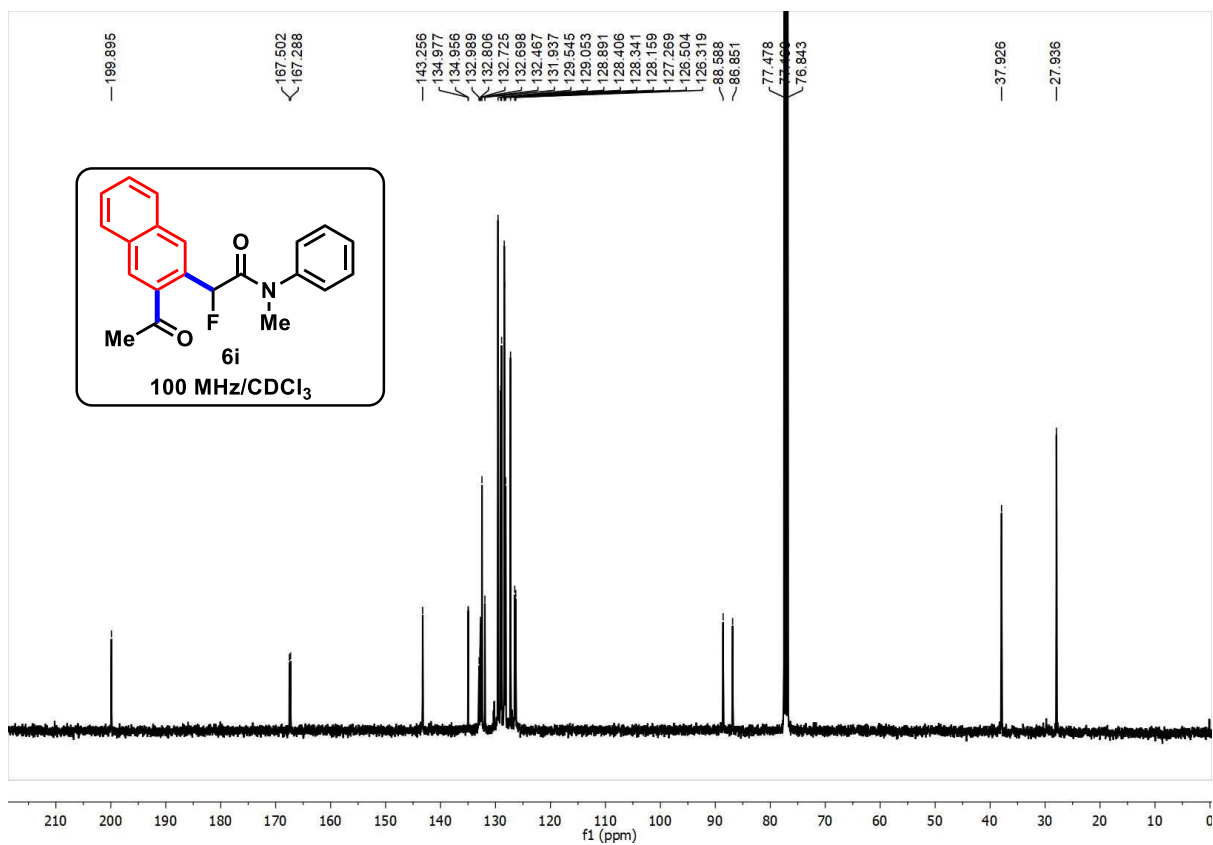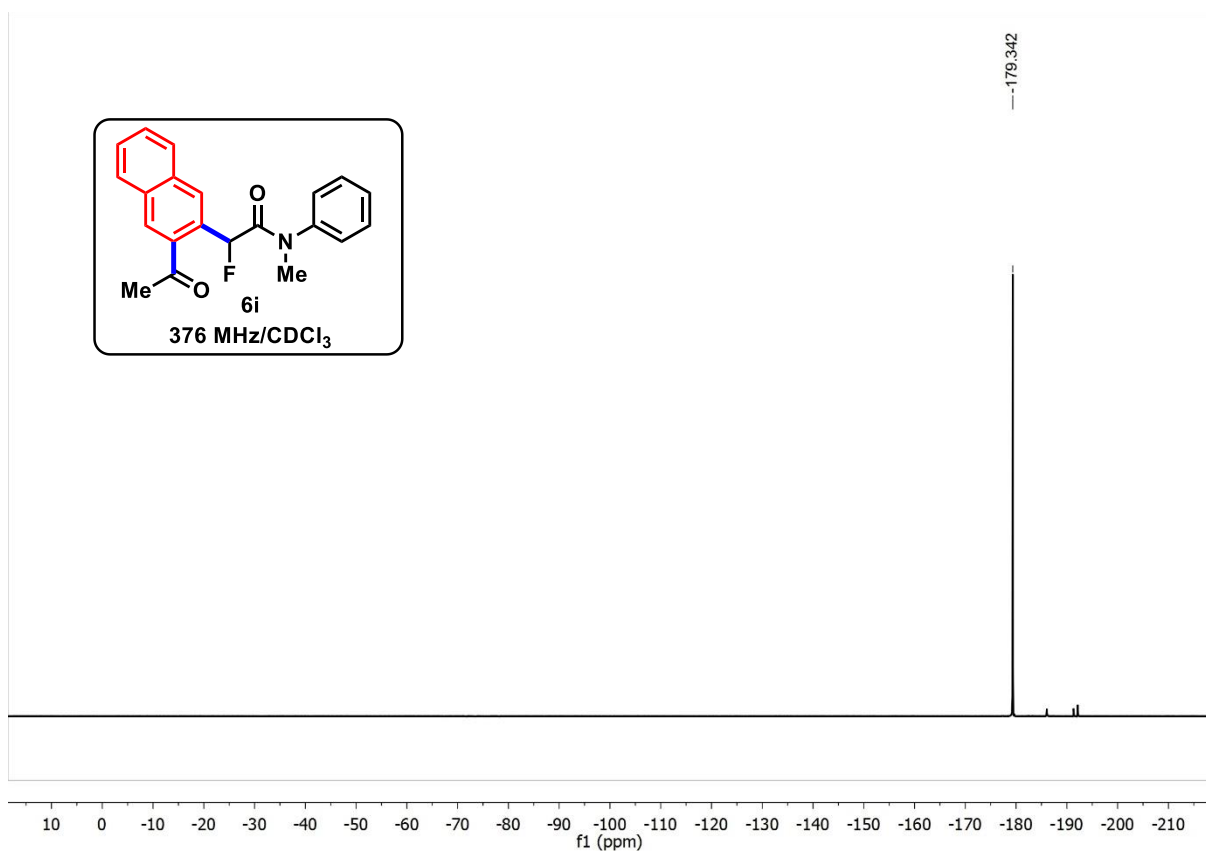

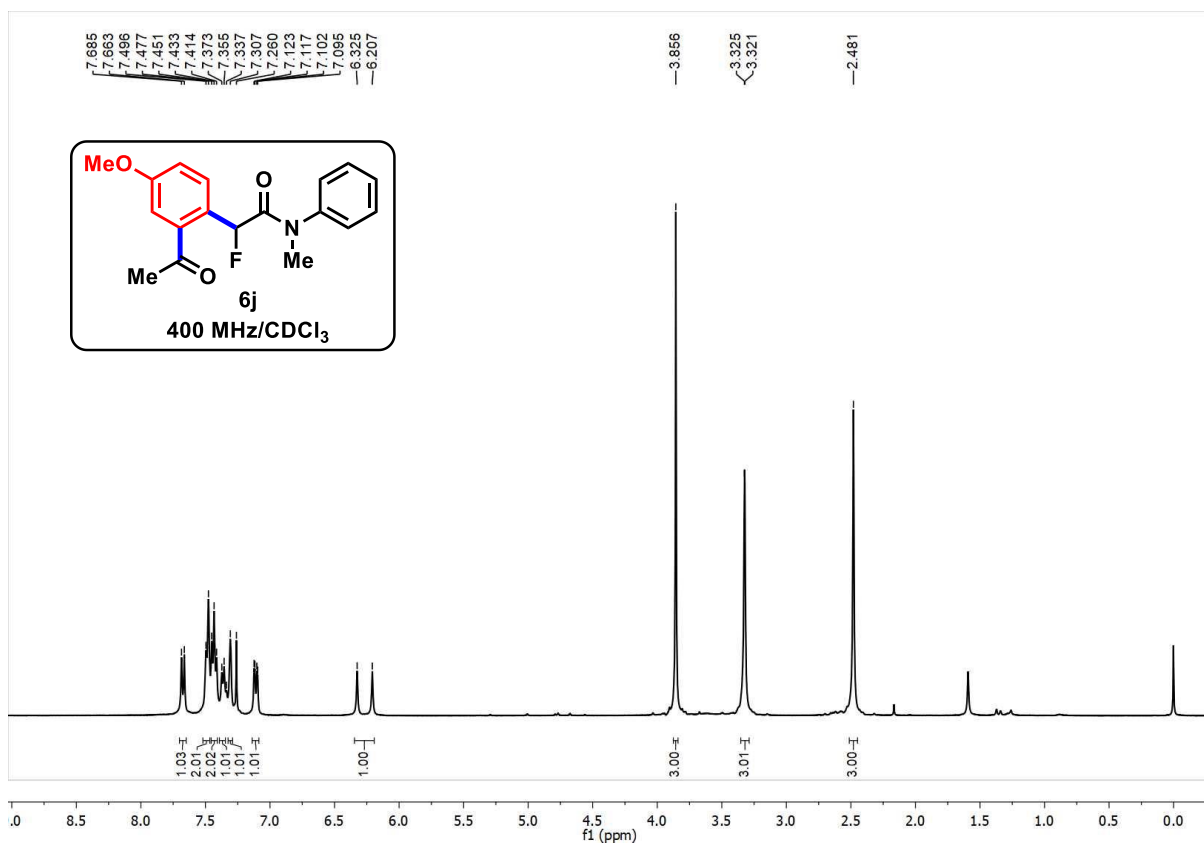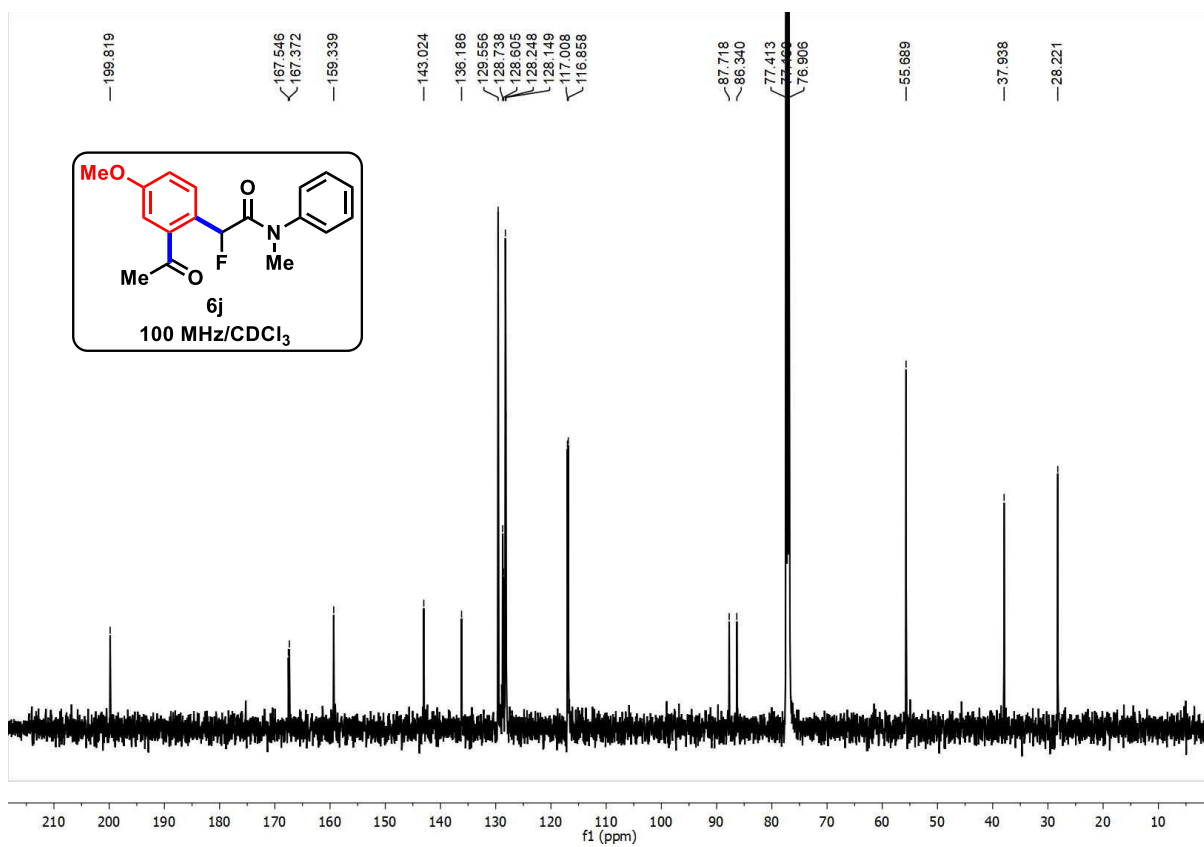

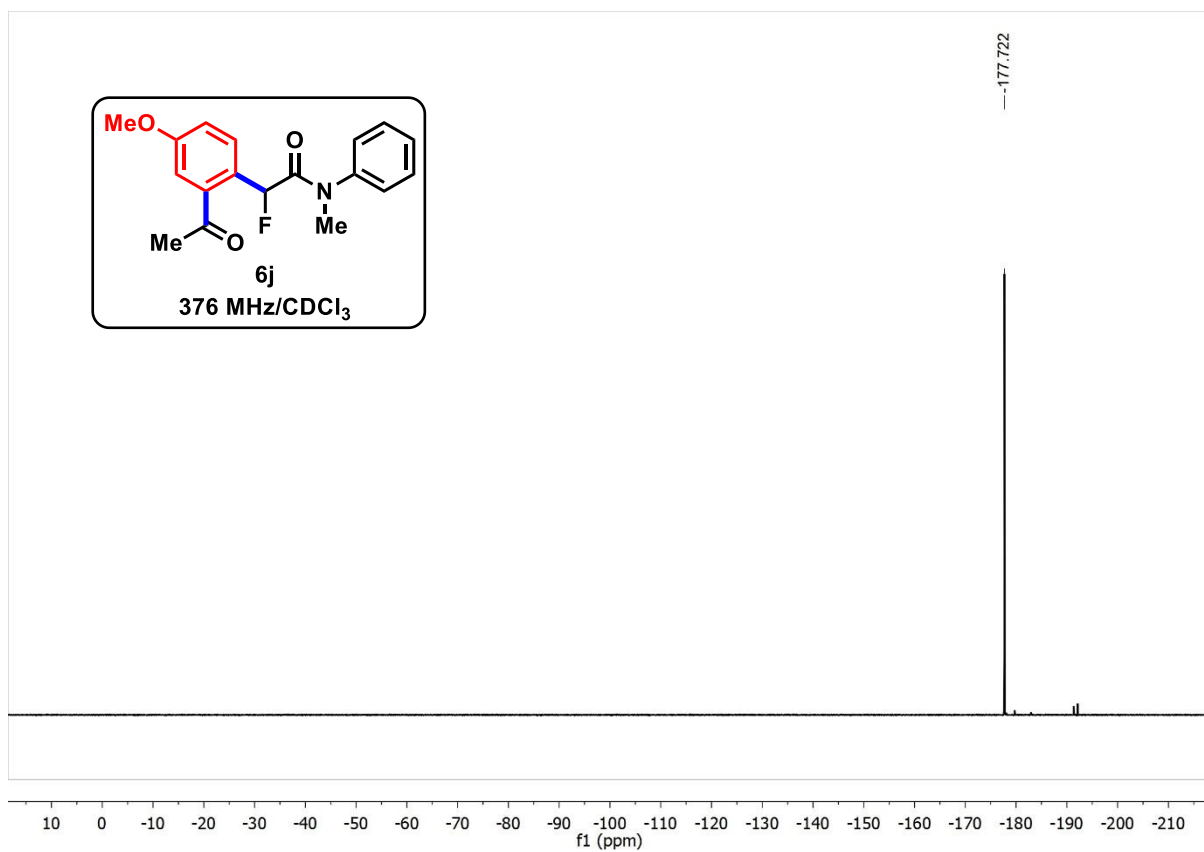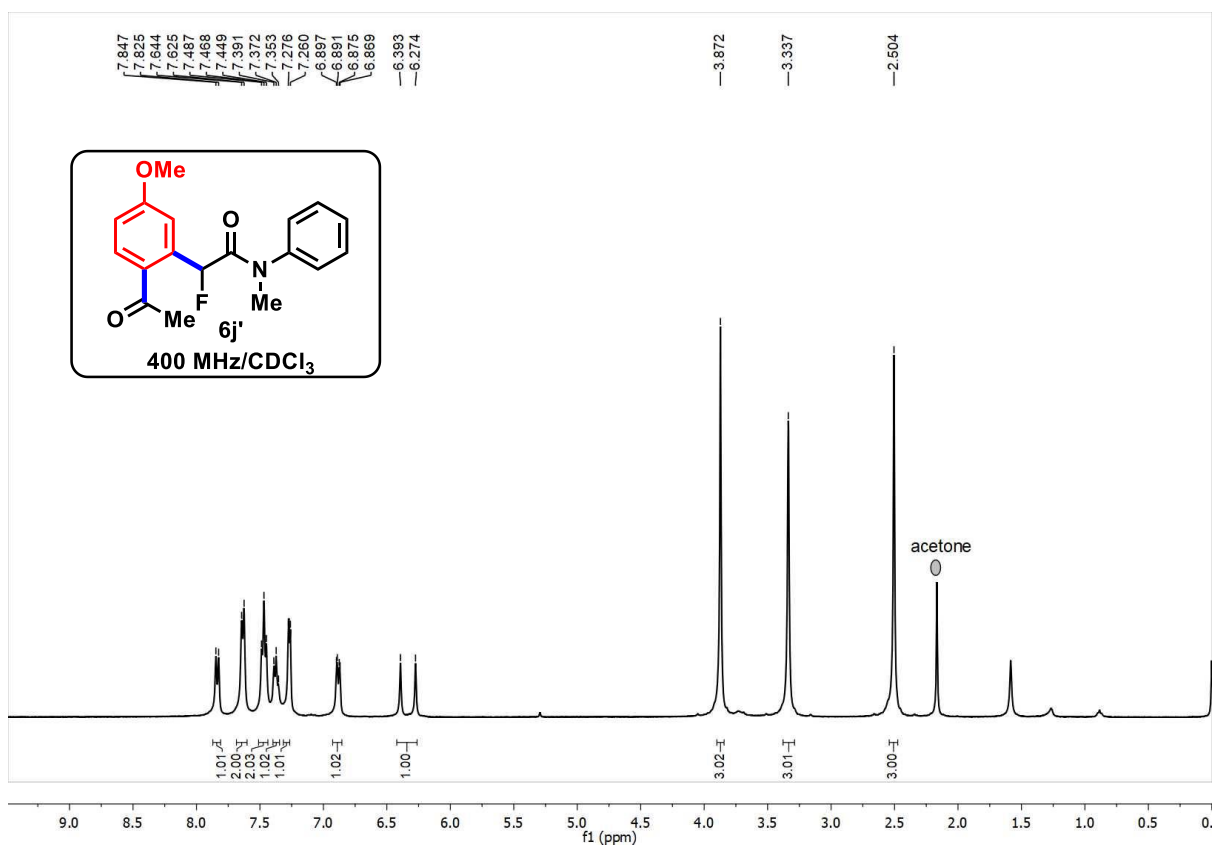

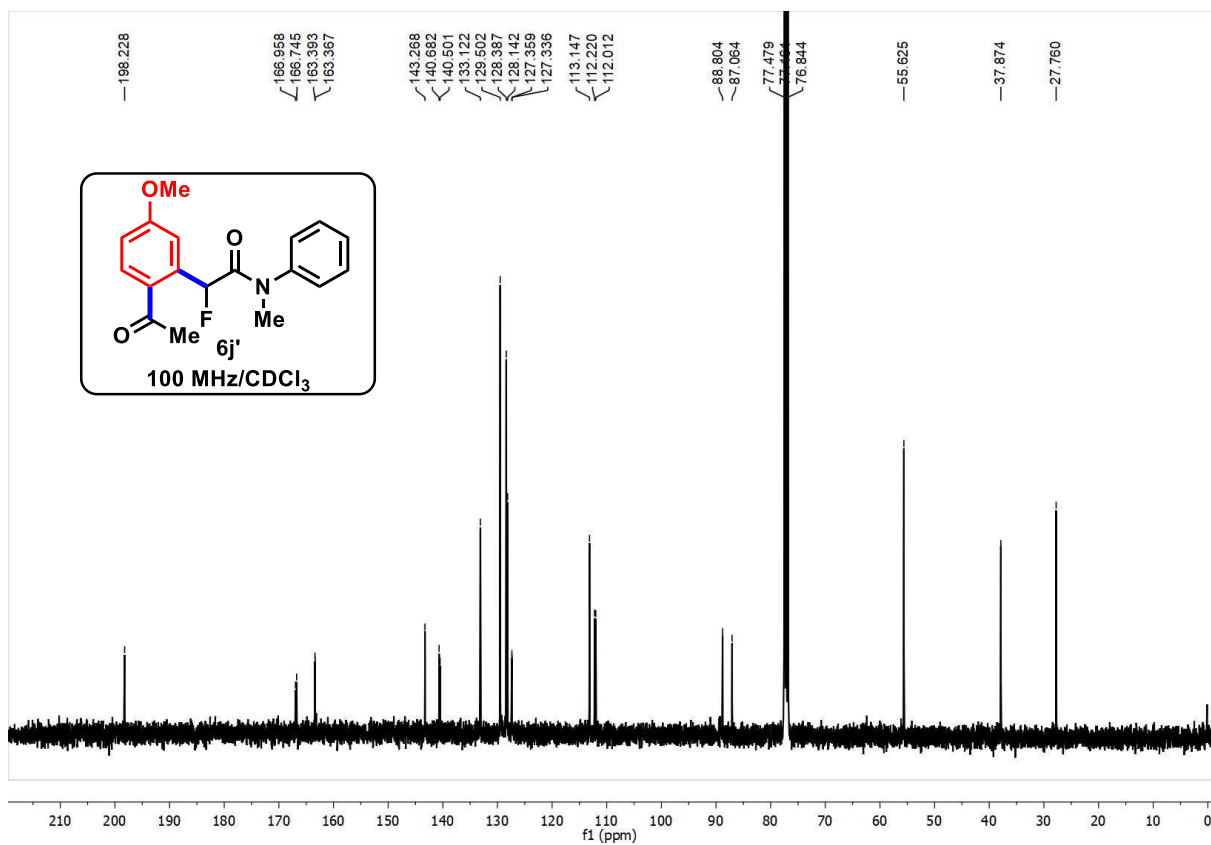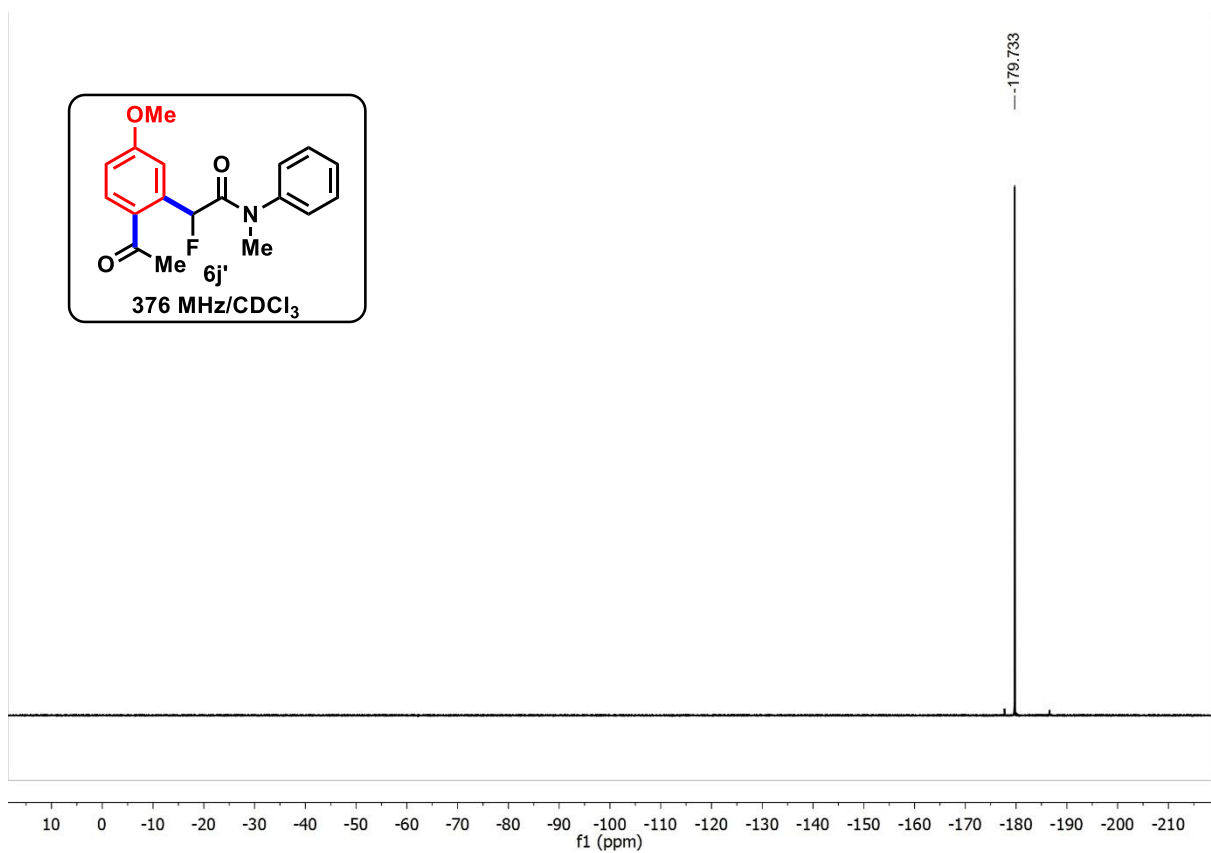



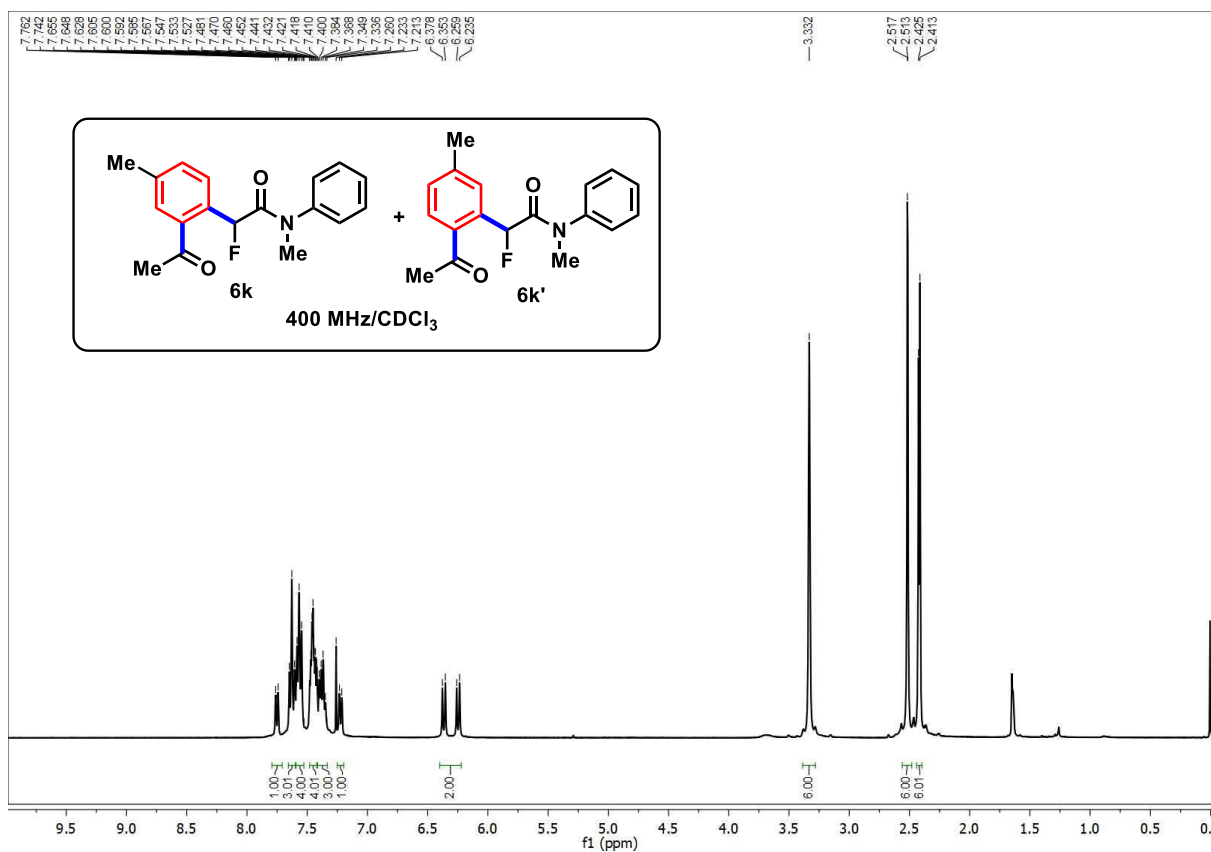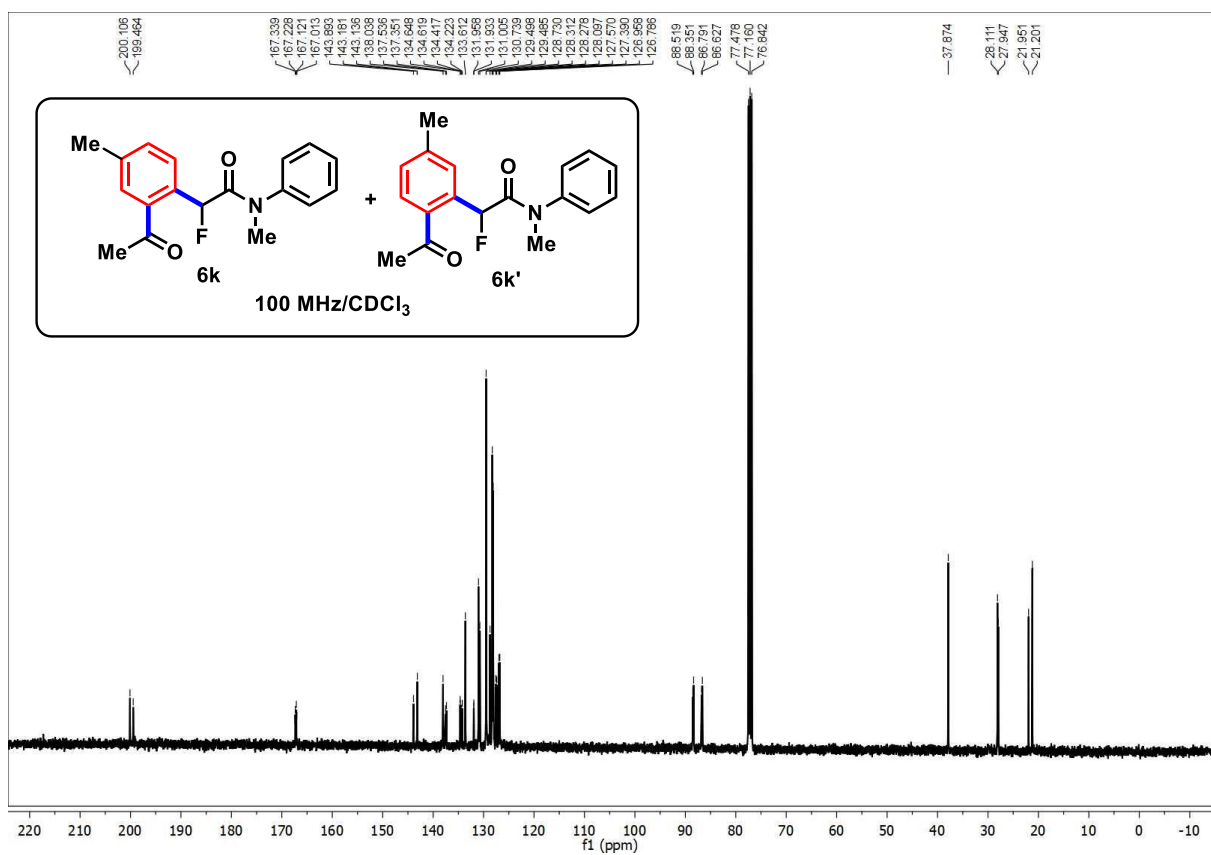

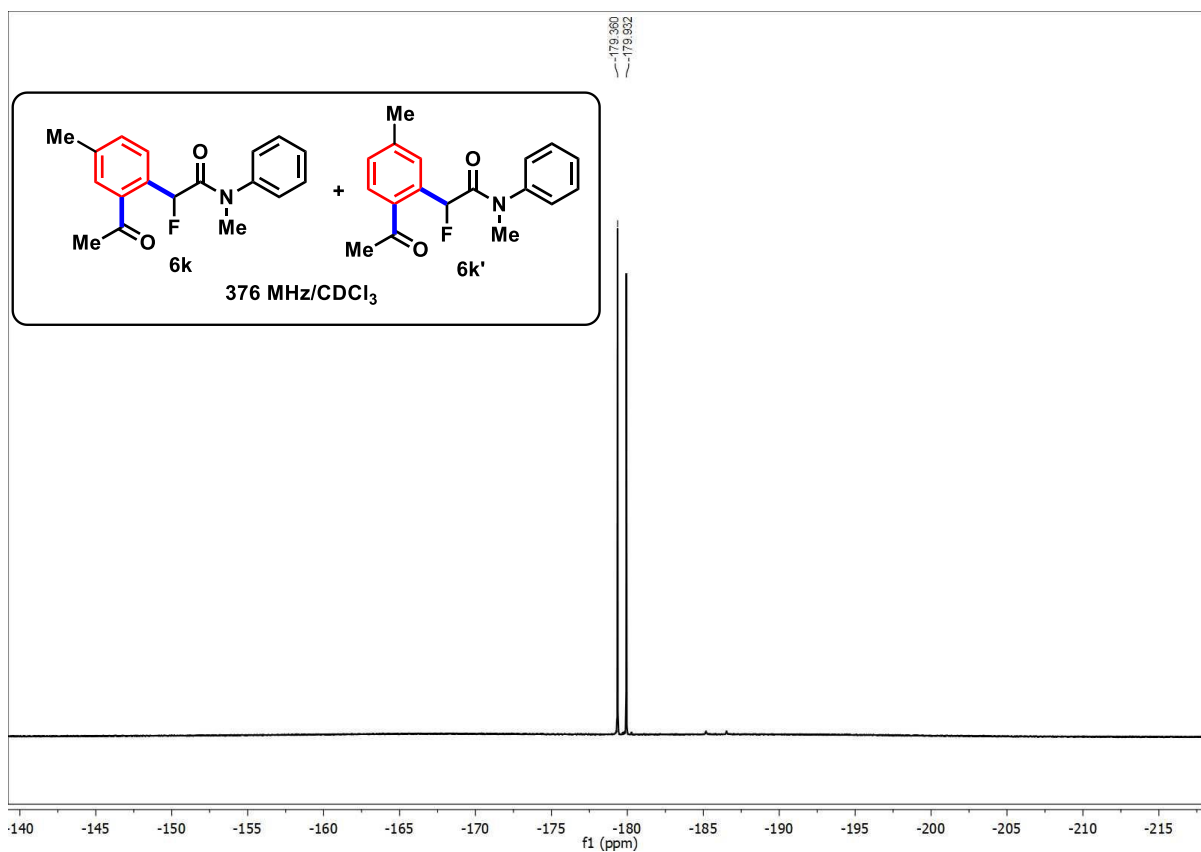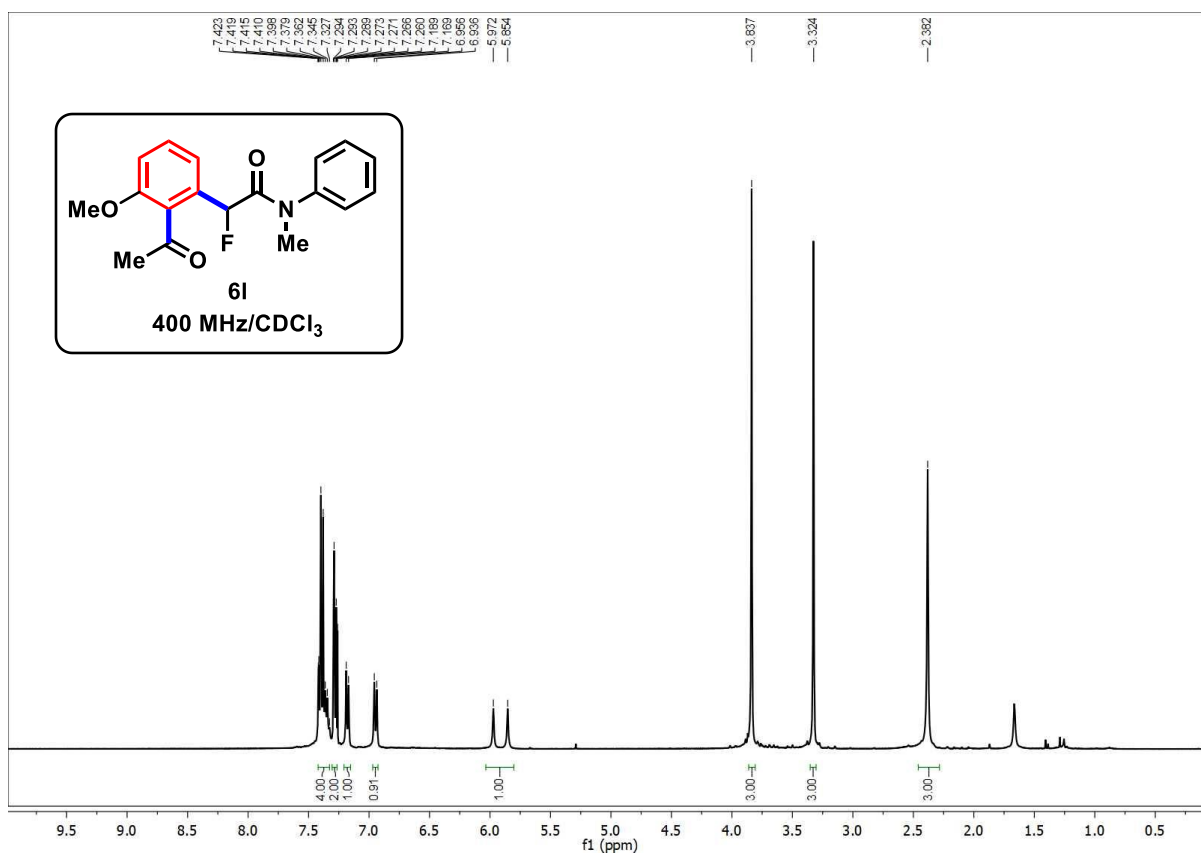

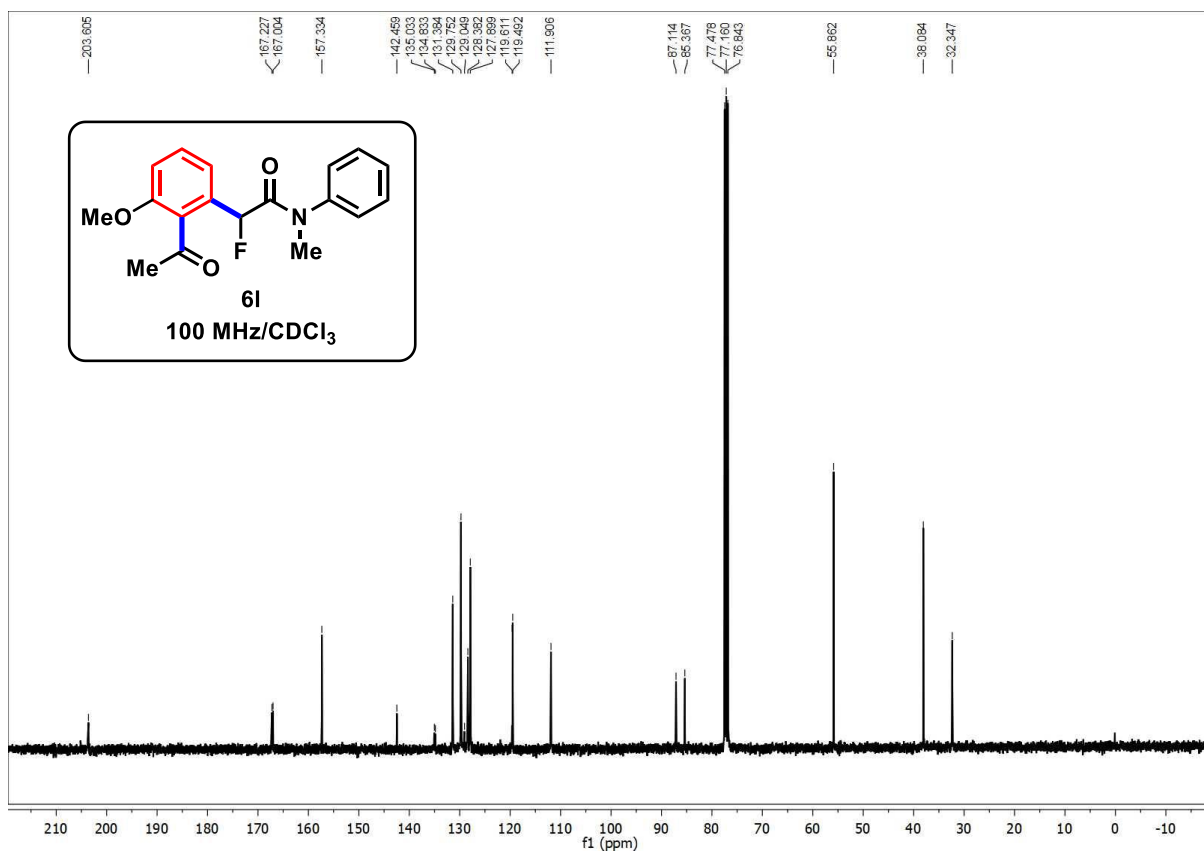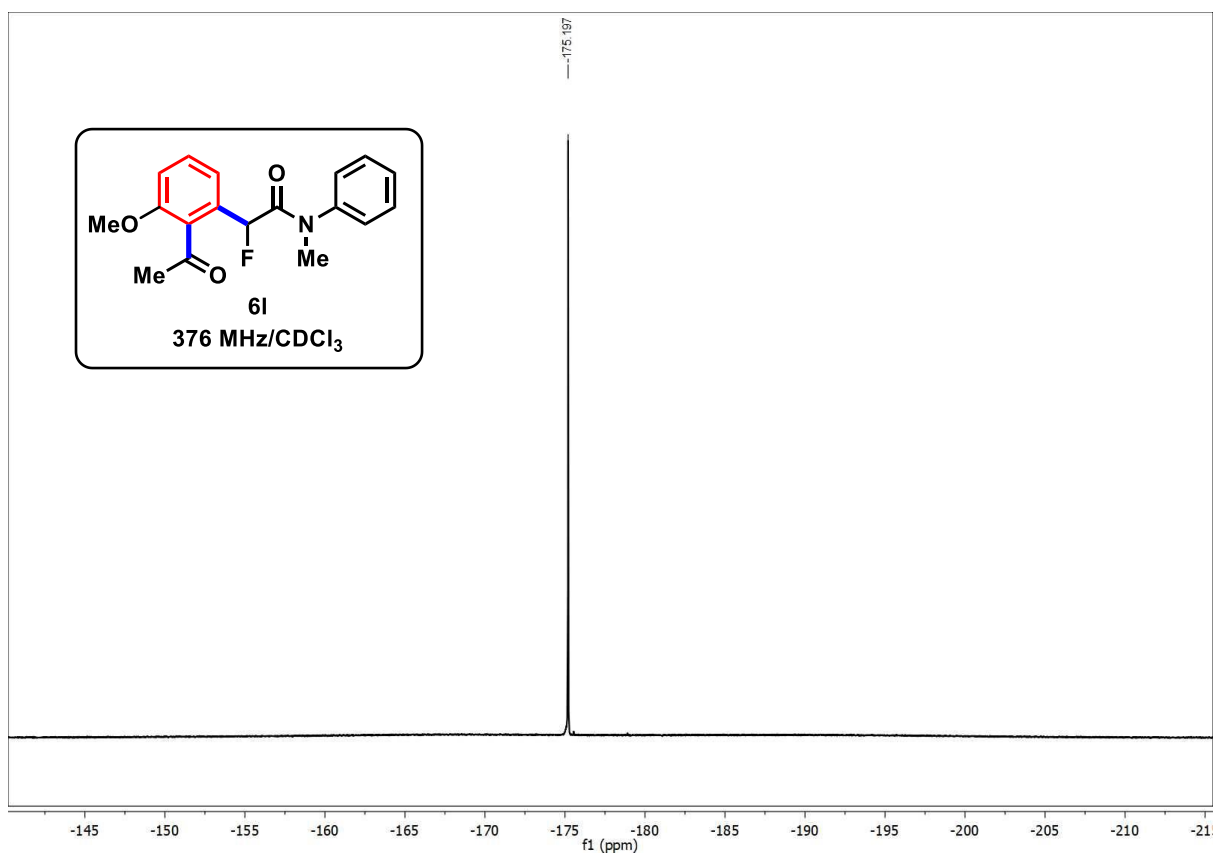

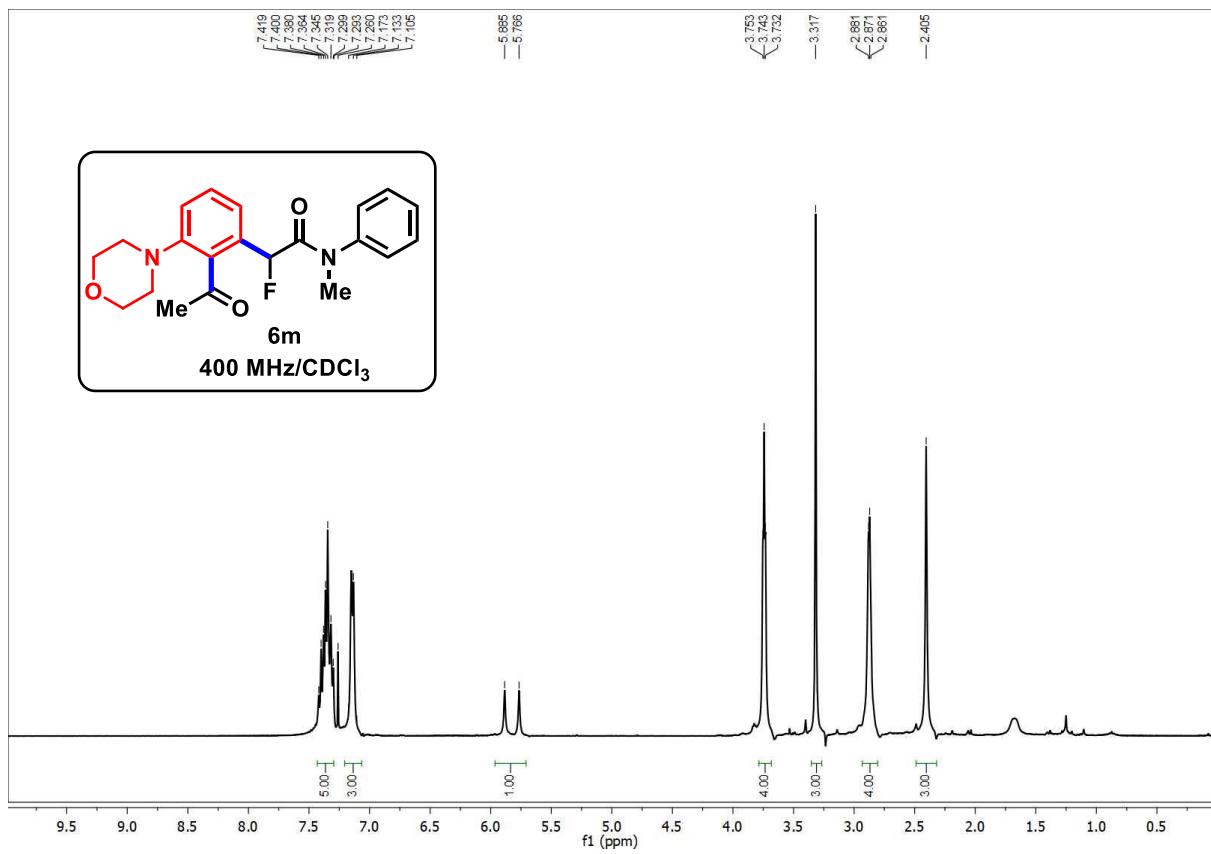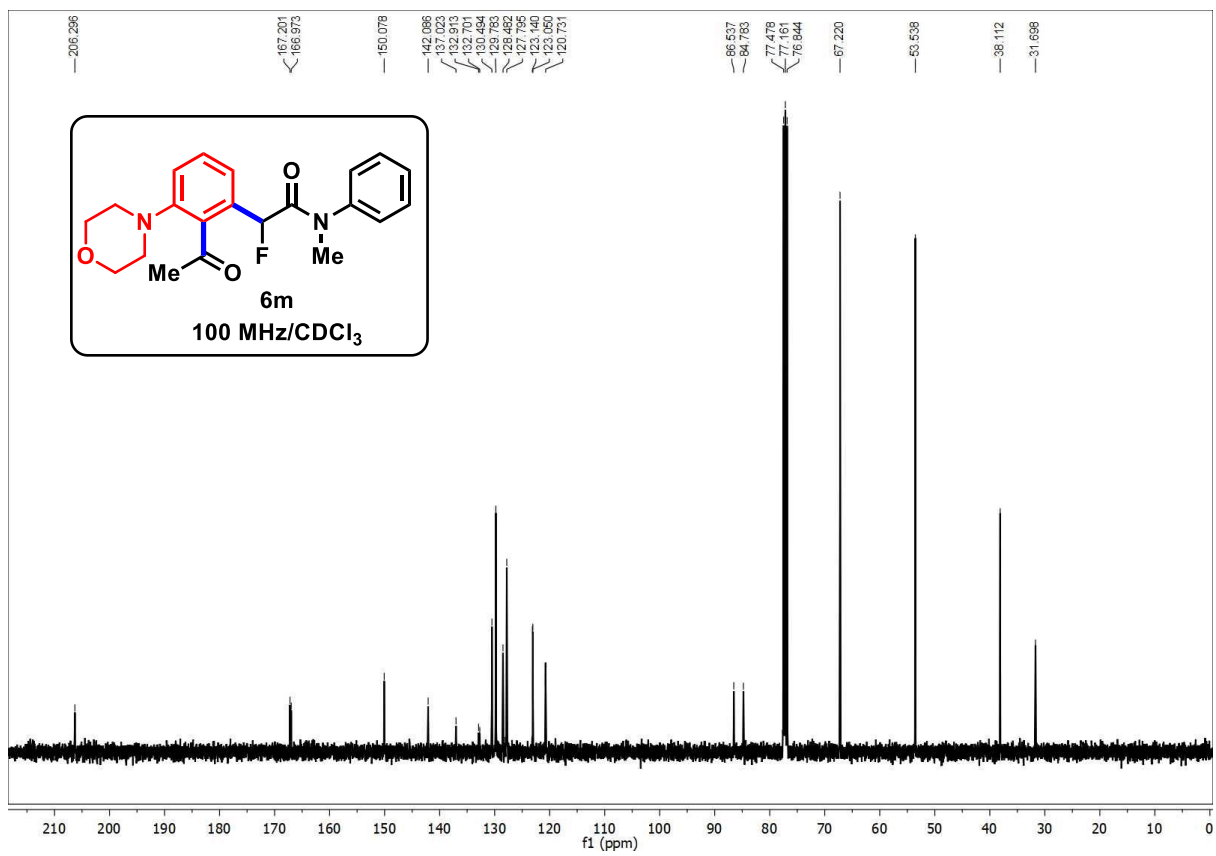

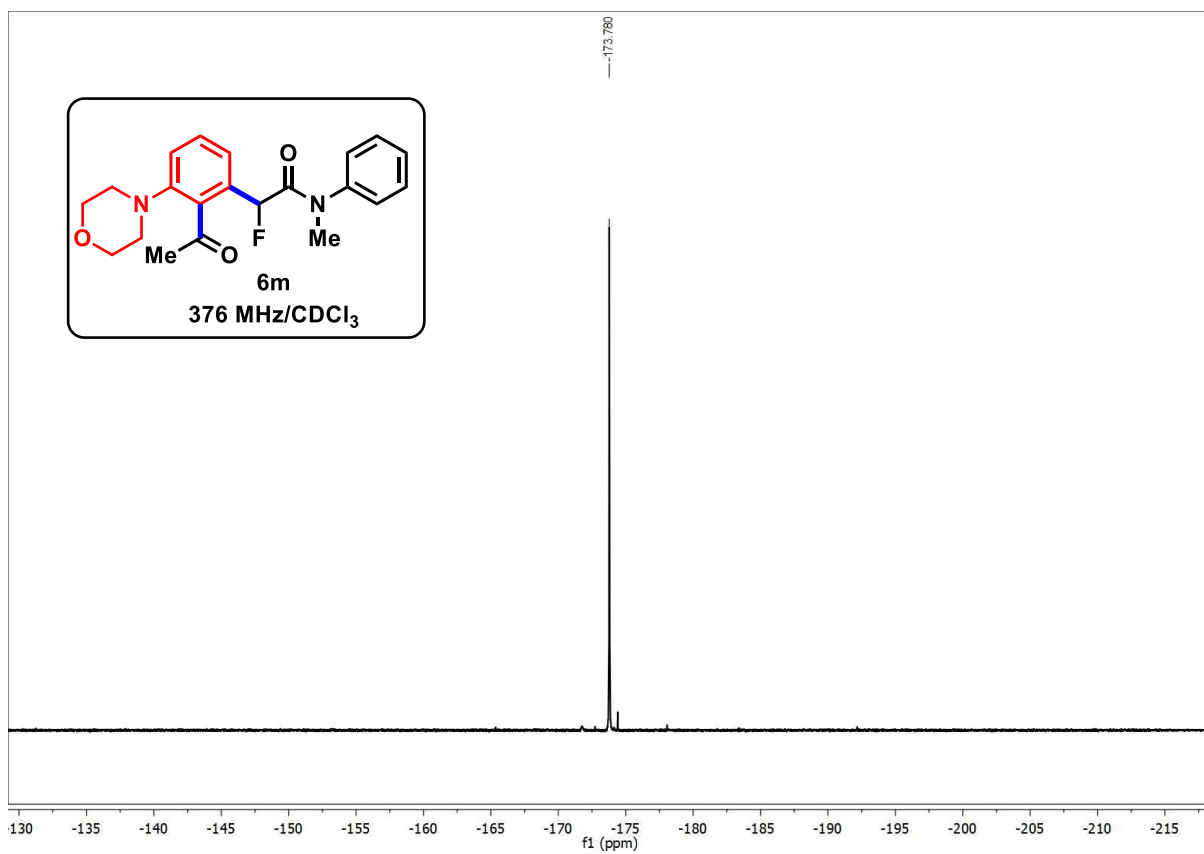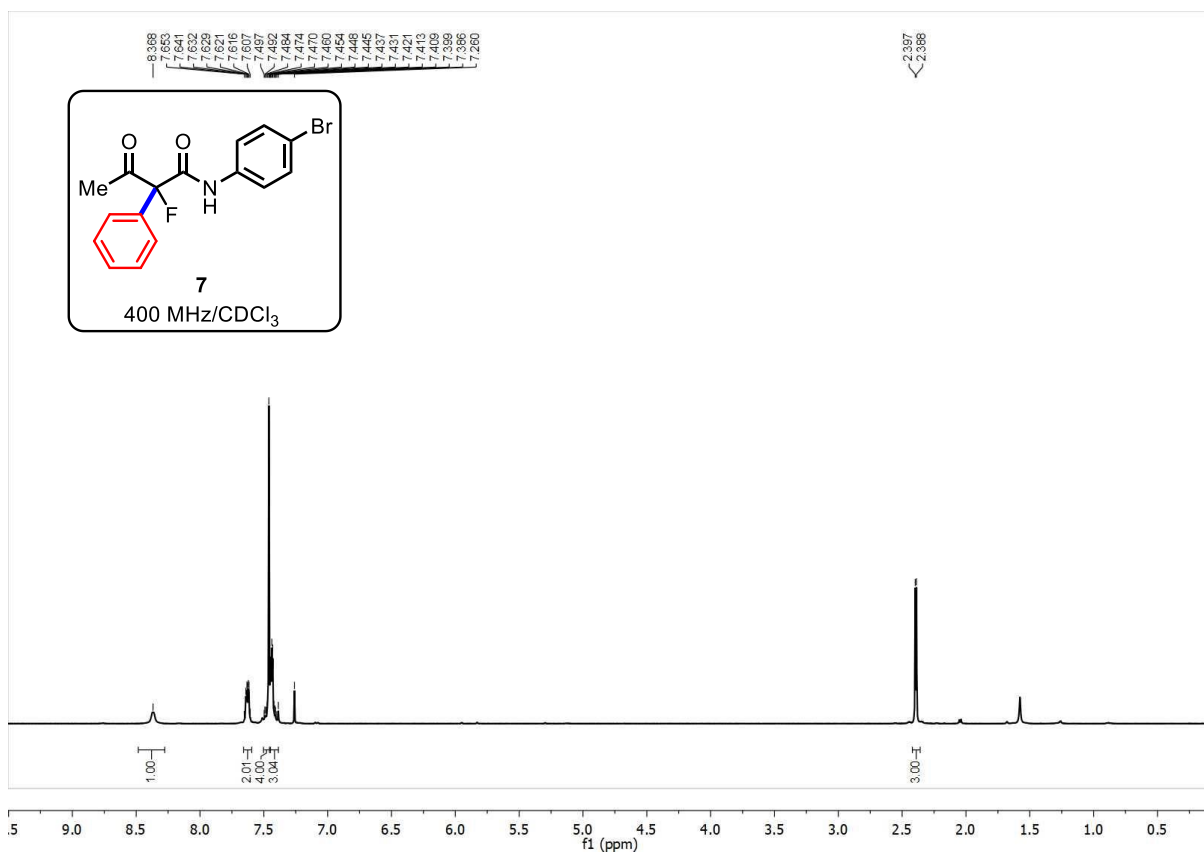

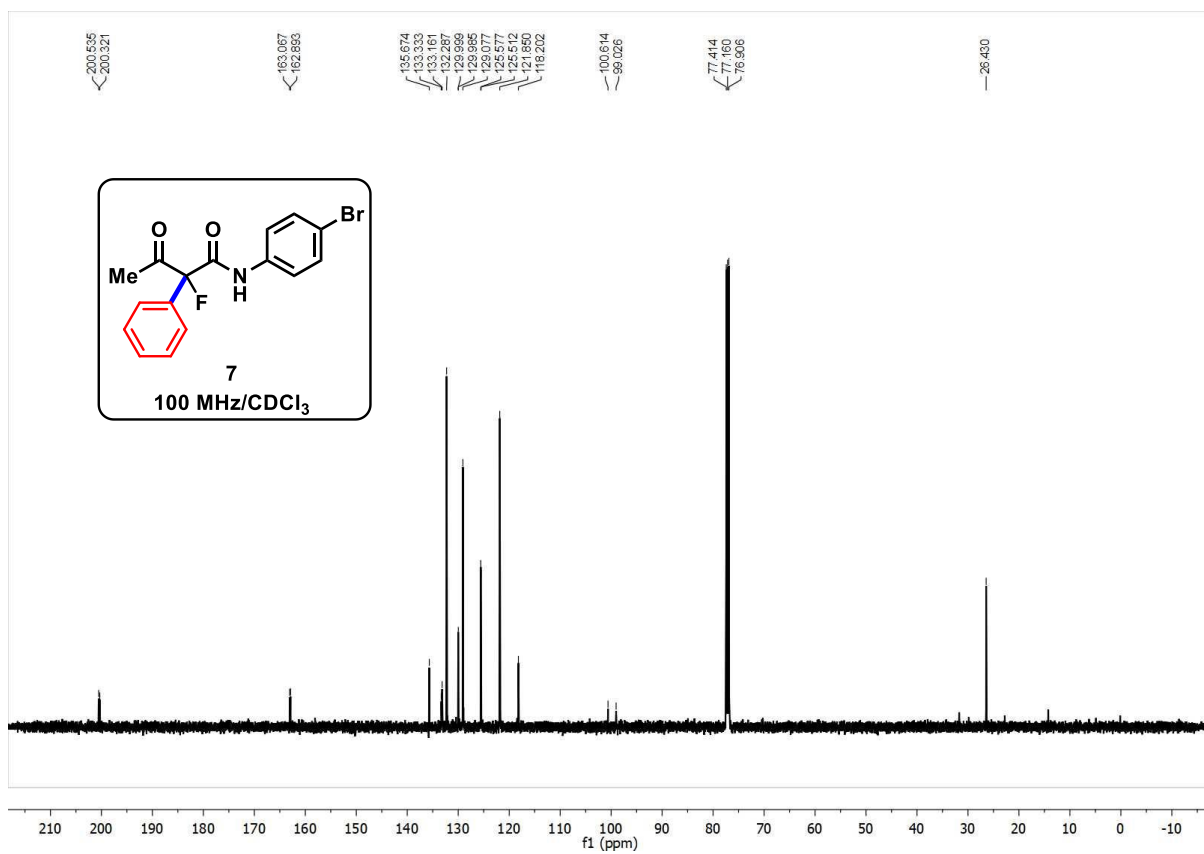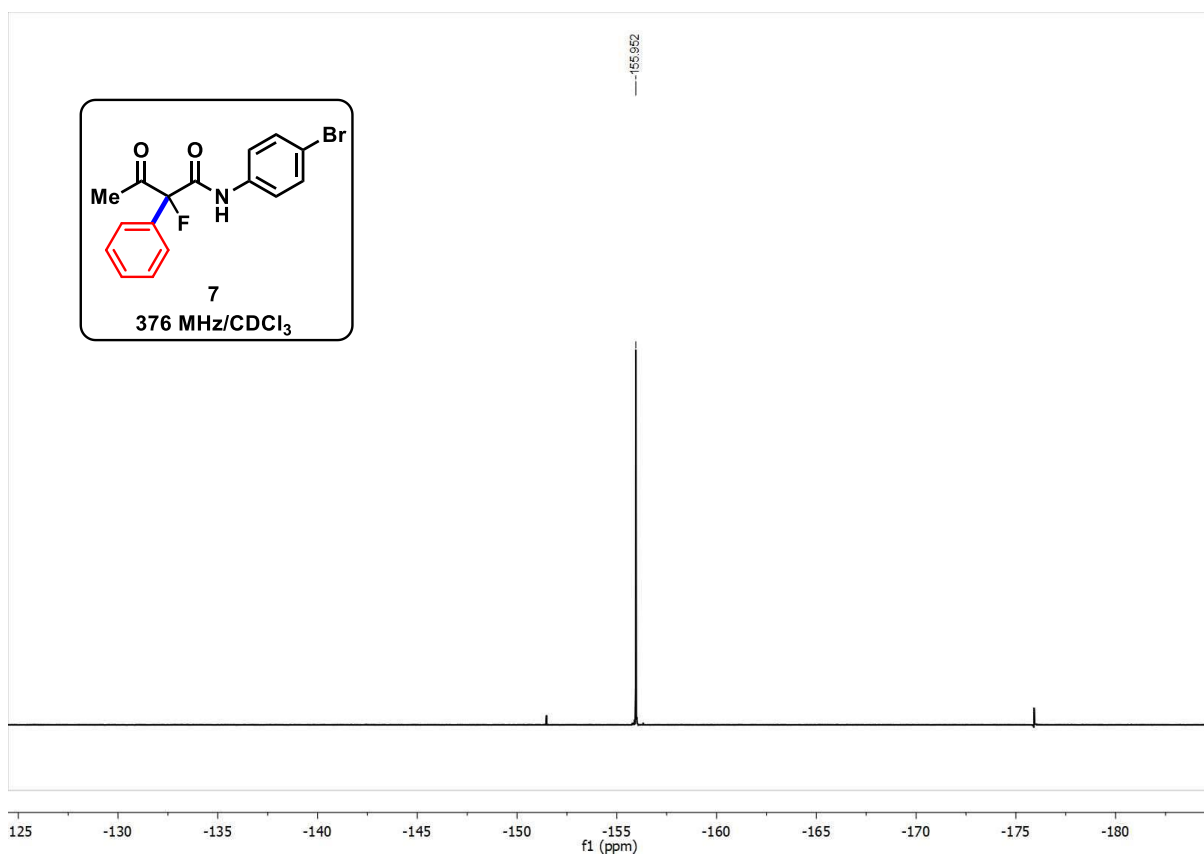

Supplement: d2cc04657a1.pdf [file d2cc04657a1.pdf]
